# Supplementary material for: Reconstruction of Litopenaeus vannamei Genome-Scale Metabolic Network Model and Nutritional Requirements Analysis of Different Shrimp Commercial Varieties
Source: Front Genet. 2021 May 12;12:658109. doi: 10.3389/fgene.2021.658109 (PMC8149995; doi:10.3389/fgene.2021.658109)
Supplement: Supplementary File 2 — The biomass reactions for the five commercial varieties of L. vannamei. [file Table_2.XLSX]

## Sheet: Reaction List
Abbreviation	Description	Reaction	GPR	Genes	Pathway	Lower bound	Upper bound	Objective	Confidence Score	EC Number	Subsystem	Reversibility
R00004	diphosphate phosphohydrolase;	C00013[c] + C00001[c] --> 2 C00009[c]	(pvm:113803221) or (pvm:113803259) or (pvm:113803270)	pvm:113803221;pvm:113803259;pvm:113803270	rn00190	0	1000	0		3.6.1.1	Energy metabolism	N
R00022	chitobiose N-acetylglucosaminohydrolase	C01674[c] + C00001[c] --> 2 C00140[c]	(pvm:113823303) or (pvm:113823305) or (pvm:113823305) or (pvm:113823306) or (pvm:113823306) or (pvm:113823307) or (pvm:113823307) or (pvm:113823330) or (pvm:113823358) or (pvm:113824451) or (pvm:113824467)	pvm:113823303;pvm:113823305;pvm:113823305;pvm:113823306;pvm:113823306;pvm:113823307;pvm:113823307;pvm:113823330;pvm:113823358;pvm:113824451;pvm:113824467	rn00520	0	1000	0		3.2.1.52	Carbohydrate metabolism	N
R00028	maltose glucohydrolase	C00208[c] + C00001[c] --> 2 C00267[c]	(pvm:113822008) or (pvm:113822019) or (pvm:113822027) or (pvm:113822041) or (pvm:113822049)	pvm:113822008;pvm:113822019;pvm:113822027;pvm:113822041;pvm:113822049	rn00500	0	1000	0		3.2.1.20	Carbohydrate metabolism	N
R00036	5-aminolevulinate hydro-lyase (adding 5-aminolevulinate and cyclizing; porphobilinogen-forming)	2 C00430[c] --> C00931[c] + 2 C00001[c]	(pvm:113818707)	pvm:113818707	rn00860	0	1000	0		4.2.1.24	Metabolism of cofactors and vitamins	N
R00057	thiol:oxygen oxidoreductase	C00007[c] + 2 C01525[c] --> C02318[c] + C00027[c]	(pvm:113800362)	pvm:113800362	rn01100	0	1000	0		1.8.3.2	Global and overview maps	N
R00073	reduced acceptor:prostaglandin G2 oxidoreductase	C00427[c] + C00028[c] + C00001[c] --> C05956[c] + C00030[c]	(pvm:113814348)	pvm:113814348	rn00590	0	1000	0		1.14.99.1	Lipid metabolism	N
R00076	ATP:phosphorylase-b phosphotransferase;	4 C00002[c] + 2 C02308[c] --> 4 C00008[c] + C02307[c]	(pvm:113812445)	pvm:113812445	rn00230	0	1000	0		2.7.11.19	Nucleotide metabolism	N
R00078	Fe(II):oxygen oxidoreductase;	C00007[c] + 4 C14818[c] + 4 C00080[c] --> 4 C14819[c] + 2 C00001[c]	(pvm:113816912)	pvm:113816912	rn00860	0	1000	0		1.16.3.1	Metabolism of cofactors and vitamins	N
R00084	porphobilinogen:(4-[2-carboxyethyl]-3-[carboxymethyl]pyrrol-2-yl)methyltransferase (hydrolysing);	4 C00931[c] + C00001[c] --> C01024[c] + 4 C00014[c]	(pvm:113803188)	pvm:113803188	rn00860	0	1000	0		2.5.1.61	Metabolism of cofactors and vitamins	N
R00085	ATP diphosphohydrolase (phosphate-forming)	C00002[c] + 2 C00001[c] --> C00020[c] + 2 C00009[c]	(pvm:113820751)	pvm:113820751	rn00230	0	1000	0		3.6.1.5	Nucleotide metabolism	N
R00089	ATP diphosphate-lyase (cyclizing; 3',5'-cyclic-AMP-forming)	C00002[c] --> C00575[c] + C00013[c]	(pvm:113803630) or (pvm:113803634) or (pvm:113804713) or (pvm:113807037) or (pvm:113807060) or (pvm:113808167)	pvm:113803630;pvm:113803634;pvm:113804713;pvm:113807037;pvm:113807060;pvm:113808167	rn00230	0	1000	0		4.6.1.1	Nucleotide metabolism	N
R00100	NADH:ferricytochrome-b5 oxidoreductase	C00004[c] + 2 C00996[c] --> C00003[c] + 2 C00999[c] + C00080[c]	(pvm:113830388) or (pvm:113830397) or (pvm:113830410) or (pvm:113827169)	pvm:113830388;pvm:113830397;pvm:113830410;pvm:113827169	rn00520	0	1000	0		1.6.2.2	Carbohydrate metabolism	N
R00104	ATP:NAD+ 2'-phosphotransferase	C00002[c] + C00003[c] --> C00008[c] + C00006[c]	(pvm:113801019) or (pvm:113801020) or (pvm:113801022) or (pvm:113801046)	pvm:113801019;pvm:113801020;pvm:113801022;pvm:113801046	rn00760	0	1000	0		2.7.1.23	Metabolism of cofactors and vitamins	N
R00106	NADPH:ferricytochrome oxidoreductase	C00005[c] + 2 C00923[c] --> C00006[c] + 2 C00924[c] + C00080[c]	(pvm:113827174)	pvm:113827174	rn00480	0	1000	0		1.6.2.4	Metabolism of other amino acids	N
R00111	N-(omega)-Hydroxyarginine,NADPH:oxygen oxidoreductase (nitric-oxide-forming)	C00005[c] + 2 C05933[c] + 2 C00007[c] + C00080[c] --> C00006[c] + 2 C00533[c] + 2 C00327[c] + 2 C00001[c]	(pvm:113828597) or (pvm:113828611)	pvm:113828597;pvm:113828611	rn00330	0	1000	0		1.14.13.39	Amino acid metabolism	N
R00122	ADP phosphohydrolase	C00008[c] + C00001[c] --> C00020[c] + C00009[c]	(pvm:113820751)	pvm:113820751	rn00230	0	1000	0		3.6.1.5	Nucleotide metabolism	N
R00124	ATP:ADP phosphatransferase	C00002[c] + C00008[c] <=> C00008[c] + C00002[c]	(pvm:113821087) or (pvm:113821105) or (pvm:113821107)	pvm:113821087;pvm:113821105;pvm:113821107	rn00230	-1000	1000	0		2.7.4.6	Nucleotide metabolism	Y
R00127	ATP:AMP phosphotransferase	C00002[c] + C00020[c] <=> 2 C00008[c]	(pvm:113819998) or (pvm:113821070) or (pvm:113821072)	pvm:113819998;pvm:113821070;pvm:113821072	rn00230	-1000	1000	0		2.7.4.3	Nucleotide metabolism	Y
R00129	(6S)-6beta-hydroxy-1,4,5,6-tetrahydronicotinamide-adenine dinucleotide hydro-lyase (ATP-hydrolysing, NADH-forming)	C00002[c] + C04856[c] --> C00008[c] + C00009[c] + C00004[c]	(pvm:113826815)	pvm:113826815	rn00230	0	1000	0		4.2.1.93	Nucleotide metabolism	N
R00130	ATP:dephospho-CoA 3'-phosphotransferase	C00002[c] + C00882[c] --> C00008[c] + C00010[c]	(pvm:113801056)	pvm:113801056	rn00770	0	1000	0		2.7.1.24	Metabolism of cofactors and vitamins	N
R00132	carbonate hydro-lyase (carbon-dioxide-forming);	C01353[c] <=> C00011[c] + C00001[c]	(pvm:113806982) or (pvm:113806994) or (pvm:113806994) or (pvm:113808119) or (pvm:113809236) or (pvm:113810338) or (pvm:113811565)	pvm:113806982;pvm:113806994;pvm:113806994;pvm:113808119;pvm:113809236;pvm:113810338;pvm:113811565	rn00220	-1000	1000	0		4.2.1.1	Amino acid metabolism	Y
R00135		C00012[c] + C00001[c] --> C00148[c] + C00012[c]	(pvm:113821591) or (pvm:113818476)	pvm:113821591;pvm:113818476	rn00330	0	1000	0		3.4.11.5	Amino acid metabolism	N
R00139	ATP:2'-deoxy-5-hydroxymethylcytidine-5'-diphosphate phosphotransferase	C11038[c] + C00002[c] --> C11039[c] + C00008[c]	(pvm:113821087) or (pvm:113821105) or (pvm:113821107)	pvm:113821087;pvm:113821105;pvm:113821107	rn00240	0	1000	0		2.7.4.6	Nucleotide metabolism	N
R00156	ATP:UDP phosphotransferase	C00002[c] + C00015[c] <=> C00008[c] + C00075[c]	(pvm:113821087) or (pvm:113821105) or (pvm:113821107)	pvm:113821087;pvm:113821105;pvm:113821107	rn00240	-1000	1000	0		2.7.4.6	Nucleotide metabolism	Y
R00157	Uridine triphosphate:AMP phosphotransferase;	C00075[c] + C00020[c] --> C00015[c] + C00008[c]	(pvm:113818784) or (pvm:113819927)	pvm:113818784;pvm:113819927	rn00240	0	1000	0		2.7.4.10	Nucleotide metabolism	N
R00161	ATP:FMN adenylyltransferase	C00002[c] + C00061[c] --> C00013[c] + C00016[c]	(pvm:113828019) or (pvm:113828032)	pvm:113828019;pvm:113828032	rn00740	0	1000	0		2.7.7.2	Metabolism of cofactors and vitamins	N
R00164	Phosphoprotein phosphohydrolase	C00562[c] + C00001[c] --> C00017[c] + C00009[c]	(pvm:113809176) or (pvm:113809193) or (pvm:113809204) or (pvm:113809215) or (pvm:113809219) or (pvm:113809225) or (pvm:113809237) or (pvm:113809326) or (pvm:113809333) or (pvm:113809355) or (pvm:113809364) or (pvm:113809375) or (pvm:113809380) or (pvm:113810483) or (pvm:113810485) or (pvm:113810545) or (pvm:113810562) or (pvm:113811658) or (pvm:113811659) or (pvm:113811660) or (pvm:113811661) or …	pvm:113809176;pvm:113809193;pvm:113809204;pvm:113809215;pvm:113809219;pvm:113809225;pvm:113809237;pvm:113809326;pvm:113809333;pvm:113809355;pvm:113809364;pvm:113809375;pvm:113809380;pvm:113810483;pvm:113810485;pvm:113810545;pvm:113810562;pvm:113811658;pvm:113811659;pvm:113811660;pvm:113811661;pvm:113811679;pvm:113811682;pvm:113811684;pvm:113812787;pvm:113812806;pvm:113812806;pvm:113813900;pvm:113…	rn00450	0	1000	0		3.1.3.16	Metabolism of other amino acids	N
R00173	pyridoxal-5'-phosphate phosphohydrolase	C00018[c] + C00001[c] --> C00250[c] + C00009[c]	(pvm:113817572)	pvm:113817572	rn00750	0	1000	0		3.1.3.74	Metabolism of cofactors and vitamins	N
R00174	ATP:pyridoxal 5'-phosphotransferase	C00002[c] + C00250[c] --> C00008[c] + C00018[c]	(pvm:113802620) or (pvm:113802630)	pvm:113802620;pvm:113802630	rn00750	0	1000	0		2.7.1.35	Metabolism of cofactors and vitamins	N
R00177	ATP:L-methionine S-adenosyltransferase	C00009[c] + C00013[c] + C00019[c] --> C00002[c] + C00073[c] + C00001[c]	(pvm:113802104) or (pvm:113802125)	pvm:113802104;pvm:113802125	rn00270	0	1000	0		2.5.1.6	Amino acid metabolism	N
R00178	S-adenosyl-L-methionine carboxy-lyase [S-adenosyl 3-(methylsulfanyl)propylamine-forming]	C00019[c] + C00080[c] --> C01137[c] + C00011[c]	(pvm:113815291)	pvm:113815291	rn00270	0	1000	0		4.1.1.50	Amino acid metabolism	N
R00183	adenosine 5'-monophosphate phosphohydrolase	C00020[c] + C00001[c] --> C00212[c] + C00009[c]	(pvm:113810309) or (pvm:113810321) or (pvm:113810336) or (pvm:113811537)	pvm:113810309;pvm:113810321;pvm:113810336;pvm:113811537	rn00230	0	1000	0		3.1.3.5	Nucleotide metabolism	N
R00187	P1,P3-bis(5'-adenosyl)-triphosphate adenylohydrolase	C06197[c] + C00001[c] --> C00008[c] + C00020[c]	(pvm:113819561) or (pvm:113819573) or (pvm:113820721)	pvm:113819561;pvm:113819573;pvm:113820721	rn00230	0	1000	0		3.6.1.29	Nucleotide metabolism	N
R00192	S-Adenosyl-L-homocysteine hydrolase	C00021[c] + C00001[c] --> C00212[c] + C00155[c]	(pvm:113829050) or (pvm:113829057)	pvm:113829050;pvm:113829057	rn00270	0	1000	0		3.3.1.1	Amino acid metabolism	N
R00200	ATP:pyruvate 2-O-phosphotransferase	C00008[c] + C00074[c] --> C00002[c] + C00022[c]	(pvm:113802658) or (pvm:113802660)	pvm:113802658;pvm:113802660	rn00010	0	1000	0		2.7.1.40	Carbohydrate metabolism	N
R00216	(S)-Malate:NADP+ oxidoreductase(oxaloacetate-decarboxylating)	C00149[c] + C00006[c] <=> C00022[c] + C00011[c] + C00005[c] + C00080[c]	(pvm:113815719)	pvm:113815719	rn00620	-1000	1000	0		1.1.1.40	Carbohydrate metabolism	Y
R00233	malonyl-CoA carboxy-lyase (acetyl-CoA-forming)	C00083[c] --> C00024[c] + C00011[c]	(pvm:113817850)	pvm:113817850	rn00410	0	1000	0		4.1.1.9	Metabolism of other amino acids	N
R00235	Acetate:CoA ligase (AMP-forming)	C00002[c] + C00033[c] + C00010[c] --> C00020[c] + C00013[c] + C00024[c]	(pvm:113814834) or (pvm:113814834)	pvm:113814834;pvm:113814834	rn00010	0	1000	0		6.2.1.1	Carbohydrate metabolism	N
R00236	acetyl adenylate:CoA acetyltransferase	C05993[c] + C00010[c] <=> C00020[c] + C00024[c]	(pvm:113814834) or (pvm:113814834)	pvm:113814834;pvm:113814834	rn00620	-1000	1000	0		6.2.1.1	Carbohydrate metabolism	Y
R00239	ATP:L-glutamate 5-phosphotransferase	C00002[c] + C00025[c] --> C00008[c] + C03287[c]	(pvm:113817660)	pvm:113817660	rn00330	0	1000	0		2.7.2.11	Amino acid metabolism	N
R00245	L-glutamate gamma-semialdehyde:NAD+ oxidoreductase	C01165[c] + C00003[c] + C00001[c] <=> C00025[c] + C00004[c] + C00080[c]	(pvm:113817770)	pvm:113817770	rn00330	-1000	1000	0		1.2.1.88	Amino acid metabolism	Y
R00251	5-oxo-L-proline amidohydrolase (ATP-hydrolysing)	C00002[c] + C01879[c] + 2 C00001[c] --> C00008[c] + C00009[c] + C00025[c]	(pvm:113807693)	pvm:113807693	rn00480	0	1000	0		3.5.2.9	Metabolism of other amino acids	N
R00253	L-Glutamate:ammonia ligase (ADP-forming)	C00002[c] + C00025[c] + C00014[c] --> C00008[c] + C00009[c] + C00064[c]	(pvm:113805901) or (pvm:113805906) or (pvm:113809347)	pvm:113805901;pvm:113805906;pvm:113809347	rn00250	0	1000	0		6.3.1.2	Amino acid metabolism	N
R00257	Deamido-NAD+:L-glutamine amido-ligase (AMP-forming)	C00002[c] + C00857[c] + C00064[c] + C00001[c] --> C00020[c] + C00013[c] + C00003[c] + C00025[c]	(pvm:113809531) or (pvm:113803960)	pvm:113809531;pvm:113803960	rn00760	0	1000	0		6.3.5.1	Metabolism of cofactors and vitamins	N
R00258	L-Alanine:2-oxoglutarate aminotransferase	C00041[c] + C00026[c] --> C00022[c] + C00025[c]	(pvm:113801959) or (pvm:113801965)	pvm:113801959;pvm:113801965	rn00220	0	1000	0		2.6.1.2	Amino acid metabolism	N
R00261	L-glutamate 1-carboxy-lyase (4-aminobutanoate-forming)	C00025[c] --> C00334[c] + C00011[c]	(pvm:113804944)	pvm:113804944	rn00250	0	1000	0		4.1.1.15	Amino acid metabolism	N
R00267	Isocitrate:NADP+ oxidoreductase (decarboxylating)	C00311[c] + C00006[c] --> C00026[c] + C00011[c] + C00005[c] + C00080[c]	(pvm:113820687) or (pvm:113820688)	pvm:113820687;pvm:113820688	rn00480	0	1000	0		1.1.1.42	Metabolism of other amino acids	N
R00268	oxalosuccinate carboxy-lyase (2-oxoglutarate-forming)	C05379[c] <=> C00026[c] + C00011[c]	(pvm:113820687) or (pvm:113820688)	pvm:113820687;pvm:113820688	rn00020	-1000	1000	0		1.1.1.42	Carbohydrate metabolism	Y
R00274	glutathione:hydrogen-peroxide oxidoreductase	C00027[c] + 2 C00051[c] --> C00127[c] + 2 C00001[c]	(pvm:113806294) or (pvm:113806295) or (pvm:113806297) or (pvm:113807425) or (pvm:113807430)	pvm:113806294;pvm:113806295;pvm:113806297;pvm:113807425;pvm:113807430	rn00480	0	1000	0		1.11.1.9	Metabolism of other amino acids	N
R00277	pyridoxamine-5'-phosphate:oxygen oxidoreductase (deaminating)	C00647[c] + C00001[c] + C00007[c] --> C00018[c] + C00014[c] + C00027[c]	(pvm:113818926)	pvm:113818926	rn00750	0	1000	0		1.4.3.5	Metabolism of cofactors and vitamins	N
R00278	pyridoxine 5'-phosphate:oxygen oxidoreductase	C00627[c] + C00007[c] --> C00027[c] + C00018[c]	(pvm:113818926)	pvm:113818926	rn00750	0	1000	0		1.4.3.5	Metabolism of cofactors and vitamins	N
R00286	UDP-glucose:NAD+ 6-oxidoreductase	C00029[c] + C00001[c] + 2 C00003[c] <=> C00167[c] + 2 C00004[c] + 2 C00080[c]	(pvm:113800170)	pvm:113800170	rn00040	-1000	1000	0		1.1.1.22	Carbohydrate metabolism	Y
R00291	UDP-glucose 4-epimerase;	C00029[c] <=> C00052[c]	(pvm:113817626) or (pvm:113817632) or (pvm:113818729) or (pvm:113819959)	pvm:113817626;pvm:113817632;pvm:113818729;pvm:113819959	rn00052	-1000	1000	0		5.1.3.2	Carbohydrate metabolism	Y
R00310	protoheme ferro-lyase (protoporphyrin-forming)	C02191[c] + C14818[c] --> C00032[c] + 2 C00080[c]	(pvm:113816314)	pvm:113816314	rn00860	0	1000	0		4.99.1.1	Metabolism of cofactors and vitamins	N
R00311	protoheme,NADPH---hemoprotein reductase:oxygen oxidoreductase (alpha-methene-oxidizing, hydroxylating)	C00032[c] + 3 C03024[c] + 3 C00007[c] <=> C00500[c] + C00237[c] + C14818[c] + 3 C03161[c] + 3 C00001[c]	(pvm:113806126)	pvm:113806126	rn00860	-1000	1000	0		1.14.14.18	Metabolism of cofactors and vitamins	Y
R00316	ATP:acetate adenylyltransferase	C00002[c] + C00033[c] <=> C00013[c] + C05993[c]	(pvm:113814834) or (pvm:113814834)	pvm:113814834;pvm:113814834	rn00620	-1000	1000	0		6.2.1.1	Carbohydrate metabolism	Y
R00317	Acetyl phosphate phosphohydrolase	C00227[c] + C00001[c] --> C00033[c] + C00009[c]	(pvm:113803315)	pvm:113803315	rn00620	0	1000	0		3.6.1.7	Carbohydrate metabolism	N
R00330	ATP:GDP phosphotransferase	C00002[c] + C00035[c] <=> C00008[c] + C00044[c]	(pvm:113821087) or (pvm:113821105) or (pvm:113821107)	pvm:113821087;pvm:113821105;pvm:113821107	rn00230	-1000	1000	0		2.7.4.6	Nucleotide metabolism	Y
R00331	ATP:nucleoside-diphosphate phosphotransferase	C00002[c] + C00454[c] --> C00008[c] + C00201[c]	(pvm:113821087) or (pvm:113821105) or (pvm:113821107)	pvm:113821087;pvm:113821105;pvm:113821107	rn00230	0	1000	0		2.7.4.6	Nucleotide metabolism	N
R00332	ATP:GMP phosphotransferase	C00002[c] + C00144[c] <=> C00008[c] + C00035[c]	(pvm:113822241)	pvm:113822241	rn00230	-1000	1000	0		2.7.4.8	Nucleotide metabolism	Y
R00336	guanosine-3',5'-bis(diphosphate) 3'-diphosphohydrolase	C01228[c] + C00001[c] <=> C00035[c] + C00013[c]	(pvm:113828125)	pvm:113828125	rn00230	-1000	1000	0		3.1.7.2	Nucleotide metabolism	Y
R00344	Pyruvate:carbon-dioxide ligase (ADP-forming)	C00002[c] + C00022[c] + C00288[c] + C00080[c] --> C00008[c] + C00009[c] + C00036[c]	(pvm:113829541)	pvm:113829541	rn00020	0	1000	0		6.4.1.1	Carbohydrate metabolism	N
R00348	2-oxosuccinamate amidohydrolase	C02362[c] + C00001[c] --> C00036[c] + C00014[c]	(pvm:113827471)	pvm:113827471	rn00250	0	1000	0		3.5.1.3	Amino acid metabolism	N
R00352	acetyl-CoA:oxaloacetate C-acetyltransferase [(pro-S)-carboxymethyl-forming, ADP-phosphorylating]	C00002[c] + C00158[c] + C00010[c] <=> C00008[c] + C00009[c] + C00024[c] + C00036[c]	(pvm:113812943)	pvm:113812943	rn00020	-1000	1000	0		2.3.3.8	Carbohydrate metabolism	Y
R00355	L-Aspartate:2-oxoglutarate aminotransferase	C00049[c] + C00026[c] <=> C00036[c] + C00025[c]	(pvm:113805416) or (pvm:113805442)	pvm:113805416;pvm:113805442	rn00250	-1000	1000	0		2.6.1.1	Amino acid metabolism	Y
R00369	L-Alanine:glyoxylate aminotransferase	C00041[c] + C00048[c] --> C00022[c] + C00037[c]	(pvm:113809969) or (pvm:113809946)	pvm:113809969;pvm:113809946	rn00250	0	1000	0		2.6.1.44	Amino acid metabolism	N
R00371	Acetyl-CoA:glycine C-acetyltransferase	C00024[c] + C00037[c] <=> C00010[c] + C03508[c]	(pvm:113812128)	pvm:113812128	rn00260	-1000	1000	0		2.3.1.29	Amino acid metabolism	Y
R00375	Deoxyadenosine 5'-triphosphate:DNA deoxynucleotidyltransferase (DNA-directed)	C00131[c] + C00039[c] --> C00013[c] + C00039[c]	(pvm:113816050) or (pvm:113816062) or (pvm:113816028) or (pvm:113817335) or (pvm:113818451) or (pvm:113818469) or (pvm:113818478) or (pvm:113818487) or (pvm:113818492) or (pvm:113819663) or (pvm:113819666) or (pvm:113819666) or (pvm:113819701) or (pvm:113819703) or (pvm:113819706) or (pvm:113820781) or (pvm:113820783) or (pvm:113820785) or (pvm:113820787) or (pvm:113820810) or (pvm:113820823) or …	pvm:113816050;pvm:113816062;pvm:113816028;pvm:113817335;pvm:113818451;pvm:113818469;pvm:113818478;pvm:113818487;pvm:113818492;pvm:113819663;pvm:113819666;pvm:113819666;pvm:113819701;pvm:113819703;pvm:113819706;pvm:113820781;pvm:113820783;pvm:113820785;pvm:113820787;pvm:113820810;pvm:113820823;pvm:113820835;pvm:113820845	rn00230	0	1000	0		2.7.7.7	Nucleotide metabolism	N
R00376	Deoxyguanosine 5'-triphosphate:DNA deoxynucleotidyltransferase (DNA-directed)	C00286[c] + C00039[c] --> C00013[c] + C00039[c]	(pvm:113816050) or (pvm:113816062) or (pvm:113816028) or (pvm:113817335) or (pvm:113818451) or (pvm:113818469) or (pvm:113818478) or (pvm:113818487) or (pvm:113818492) or (pvm:113819663) or (pvm:113819666) or (pvm:113819666) or (pvm:113819701) or (pvm:113819703) or (pvm:113819706) or (pvm:113820781) or (pvm:113820783) or (pvm:113820785) or (pvm:113820787) or (pvm:113820810) or (pvm:113820823) or …	pvm:113816050;pvm:113816062;pvm:113816028;pvm:113817335;pvm:113818451;pvm:113818469;pvm:113818478;pvm:113818487;pvm:113818492;pvm:113819663;pvm:113819666;pvm:113819666;pvm:113819701;pvm:113819703;pvm:113819706;pvm:113820781;pvm:113820783;pvm:113820785;pvm:113820787;pvm:113820810;pvm:113820823;pvm:113820835;pvm:113820845	rn00230	0	1000	0		2.7.7.7	Nucleotide metabolism	N
R00377	Deoxycytidine triphosphate:DNA deoxynucleotidyltransferase (DNA-directed)	C00458[c] + C00039[c] --> C00013[c] + C00039[c]	(pvm:113816050) or (pvm:113816062) or (pvm:113816028) or (pvm:113817335) or (pvm:113818451) or (pvm:113818469) or (pvm:113818478) or (pvm:113818487) or (pvm:113818492) or (pvm:113819663) or (pvm:113819666) or (pvm:113819666) or (pvm:113819701) or (pvm:113819703) or (pvm:113819706) or (pvm:113820781) or (pvm:113820783) or (pvm:113820785) or (pvm:113820787) or (pvm:113820810) or (pvm:113820823) or …	pvm:113816050;pvm:113816062;pvm:113816028;pvm:113817335;pvm:113818451;pvm:113818469;pvm:113818478;pvm:113818487;pvm:113818492;pvm:113819663;pvm:113819666;pvm:113819666;pvm:113819701;pvm:113819703;pvm:113819706;pvm:113820781;pvm:113820783;pvm:113820785;pvm:113820787;pvm:113820810;pvm:113820823;pvm:113820835;pvm:113820845	rn00240	0	1000	0		2.7.7.7	Nucleotide metabolism	N
R00378	deoxythymidine triphosphate:DNA deoxynucleotidyltransferase (DNA-directed)	C00459[c] + C00039[c] --> C00013[c] + C00039[c]	(pvm:113816050) or (pvm:113816062) or (pvm:113816028) or (pvm:113817335) or (pvm:113818451) or (pvm:113818469) or (pvm:113818478) or (pvm:113818487) or (pvm:113818492) or (pvm:113819663) or (pvm:113819666) or (pvm:113819666) or (pvm:113819701) or (pvm:113819703) or (pvm:113819706) or (pvm:113820781) or (pvm:113820783) or (pvm:113820785) or (pvm:113820787) or (pvm:113820810) or (pvm:113820823) or …	pvm:113816050;pvm:113816062;pvm:113816028;pvm:113817335;pvm:113818451;pvm:113818469;pvm:113818478;pvm:113818487;pvm:113818492;pvm:113819663;pvm:113819666;pvm:113819666;pvm:113819701;pvm:113819703;pvm:113819706;pvm:113820781;pvm:113820783;pvm:113820785;pvm:113820787;pvm:113820810;pvm:113820823;pvm:113820835;pvm:113820845	rn00240	0	1000	0		2.7.7.7	Nucleotide metabolism	N
R00388	Acyl-CoA:oxygen 2-oxidoreductase	C00040[c] + C00007[c] + C06547[c] --> C00658[c] + C00027[c]	(pvm:113823684) or (pvm:113823690) or (pvm:113823704) or (pvm:113823712)	pvm:113823684;pvm:113823690;pvm:113823704;pvm:113823712	rn00630	0	1000	0		1.3.3.6	Carbohydrate metabolism	N
R00389	medium-chain-fatty-acid:CoA ligase (AMP-forming)	C00002[c] + C00060[c] + C00010[c] + C00080[c] --> C00020[c] + C00013[c] + C00040[c]	(pvm:113818601) or (pvm:113818601) or (pvm:113818601)	pvm:113818601;pvm:113818601;pvm:113818601	rn00071	0	1000	0		6.2.1.2	Lipid metabolism	N
R00390	long-chain-fatty-acid:CoA ligase (AMP-forming)	C00002[c] + C00347[c] + C00010[c] --> C00020[c] + C00013[c] + C00040[c] + C06547[c]	(pvm:113827912) or (pvm:113804690) or (pvm:113808128) or (pvm:113811548) or (pvm:113811579) or (pvm:113812698)	pvm:113827912;pvm:113804690;pvm:113808128;pvm:113811548;pvm:113811579;pvm:113812698	rn00061	0	1000	0		6.2.1.3	Lipid metabolism	N
R00405	Succinate:CoA ligase (ADP-forming)	C00002[c] + C00042[c] + C00010[c] <=> C00008[c] + C00009[c] + C00091[c]	(pvm:113824552) or (pvm:113824552) or (pvm:113824571) or (pvm:113825733)	pvm:113824552;pvm:113824552;pvm:113824571;pvm:113825733	rn00020	-1000	1000	0		6.2.1.5	Carbohydrate metabolism	Y
R00410	succinyl-CoA:acetoacetate CoA-transferase	C00091[c] + C00164[c] <=> C00042[c] + C00332[c]	(pvm:113826605)	pvm:113826605	rn00072	-1000	1000	0		2.8.3.5	Lipid metabolism	Y
R00416	UTP:N-acetyl-alpha-D-glucosamine-1-phosphate uridylyltransferase	C00075[c] + C04501[c] --> C00013[c] + C00043[c]	(pvm:113828035)	pvm:113828035	rn00520	0	1000	0		2.7.7.23	Carbohydrate metabolism	N
R00424	GTP 7,8-8,9-dihydrolase	C00044[c] + C00001[c] --> C04895[c] + C00058[c]	(pvm:113814667) or (pvm:113815860) or (pvm:113817190)	pvm:113814667;pvm:113815860;pvm:113817190	rn00230	0	1000	0		3.5.4.16	Nucleotide metabolism	N
R00428	GTP 8,9-hydrolase	C00044[c] + C00001[c] --> C05922[c]	(pvm:113814667) or (pvm:113815860) or (pvm:113817190)	pvm:113814667;pvm:113815860;pvm:113817190	rn00790	0	1000	0		3.5.4.16	Metabolism of cofactors and vitamins	N
R00430	GTP:pyruvate 2-O-phosphotransferase	C00044[c] + C00022[c] <=> C00035[c] + C00074[c]	(pvm:113802658) or (pvm:113802660)	pvm:113802658;pvm:113802660	rn00230	-1000	1000	0		2.7.1.40	Nucleotide metabolism	Y
R00431	GTP:oxaloacetate carboxy-lyase (adding GTP;phosphoenolpyruvate-forming);	C00044[c] + C00036[c] <=> C00035[c] + C00074[c] + C00011[c]	(pvm:113814032) or (pvm:113814032) or (pvm:113814039)	pvm:113814032;pvm:113814032;pvm:113814039	rn00620	-1000	1000	0		4.1.1.32	Carbohydrate metabolism	Y
R00432	Succinate:CoA ligase (GDP-forming)	C00044[c] + C00042[c] + C00010[c] <=> C00035[c] + C00009[c] + C00091[c]	(pvm:113824470) or (pvm:113802516) or (pvm:113803627) or (pvm:113804700)	pvm:113824470;pvm:113802516;pvm:113803627;pvm:113804700	rn00020	-1000	1000	0		6.2.1.4	Carbohydrate metabolism	Y
R00437	polyribonucleotide:phosphate adenylyltransferase	C00046[c] + C00009[c] --> C00046[c] + C00008[c]	(pvm:113821987)	pvm:113821987	rn00230	0	1000	0		2.7.7.8	Nucleotide metabolism	N
R00438	polyribonucleotide:phosphate uridylyltransferase	C00046[c] + C00009[c] --> C00046[c] + C00015[c]	(pvm:113821987)	pvm:113821987	rn00230	0	1000	0		2.7.7.8	Nucleotide metabolism	N
R00439	polyribonucleotide:phosphate guanylyltransferase	C00046[c] + C00009[c] --> C00046[c] + C00035[c]	(pvm:113821987)	pvm:113821987	rn00230	0	1000	0		2.7.7.8	Nucleotide metabolism	N
R00440	polyribonucleotide:phosphate cytidylyltransferase	C00046[c] + C00009[c] --> C00046[c] + C00112[c]	(pvm:113821987)	pvm:113821987	rn00240	0	1000	0		2.7.7.8	Nucleotide metabolism	N
R00451	meso-2,6-diaminoheptanedioate carboxy-lyase (L-lysine-forming)	C00680[c] --> C00047[c] + C00011[c]	(pvm:113808413)	pvm:113808413	rn00300	0	1000	0		4.1.1.20	Amino acid metabolism	N
R00465	glycolate:NADP+ oxidoreductase	C00160[c] + C00006[c] <=> C00048[c] + C00005[c] + C00080[c]	(pvm:113824098)	pvm:113824098	rn00630	-1000	1000	0		1.1.1.79	Carbohydrate metabolism	Y
R00471	4-hydroxy-2-oxoglutarate glyoxylate-lyase (pyruvate-forming)	C05946[c] --> C00022[c] + C00048[c]	(pvm:113804688)	pvm:113804688	rn00330	0	1000	0		4.1.3.16	Amino acid metabolism	N
R00475	glycolate:oxygen 2-oxidoreductase	C00160[c] + C00007[c] --> C00048[c] + C00027[c]	(pvm:113827607)	pvm:113827607	rn00630	0	1000	0		1.1.3.15	Carbohydrate metabolism	N
R00494	glutathione gamma-glutamylaminopeptidase	C00051[c] + C00001[c] --> C01419[c] + C00025[c]	(pvm:113810472) or (pvm:113811680)	pvm:113810472;pvm:113811680	rn00480	0	1000	0		3.4.19.13	Metabolism of other amino acids	N
R00497	gamma-L-glutamyl-L-cysteine:glycine ligase (ADP-forming)	C00002[c] + C00669[c] + C00037[c] --> C00008[c] + C00009[c] + C00051[c]	(pvm:113824606) or (pvm:113825764)	pvm:113824606;pvm:113825764	rn00480	0	1000	0		6.3.2.3	Metabolism of other amino acids	N
R00503	UDP-alpha-D-galactose:D-glucose 4-beta-D-galactosyltransferase	C00052[c] + C00267[c] --> C00015[c] + C00243[c]	(pvm:113828354) or (pvm:113828357) or (pvm:113828366) or (pvm:113828370) or (pvm:113828374) or (pvm:113828381)	pvm:113828354;pvm:113828357;pvm:113828366;pvm:113828370;pvm:113828374;pvm:113828381	rn00052	0	1000	0		2.4.1.22	Carbohydrate metabolism	N
R00508	3'-phospho-5'-adenylyl sulfate 3'-phosphohydrolase	C00053[c] + C00001[c] --> C00224[c] + C00009[c]	(pvm:113817504) or (pvm:113817521) or (pvm:113817571)	pvm:113817504;pvm:113817521;pvm:113817571	rn00920	0	1000	0		3.1.3.7	Energy metabolism	N
R00509	ATP:adenylylsulfate 3'-phosphotransferase	C00002[c] + C00224[c] --> C00008[c] + C00053[c]	(pvm:113801064)	pvm:113801064	rn00230	0	1000	0		2.7.1.25	Nucleotide metabolism	N
R00514	CDP phosphohydrolase	C00112[c] + C00001[c] --> C00055[c] + C00009[c]	(pvm:113820751)	pvm:113820751	rn00240	0	1000	0		3.6.1.5	Nucleotide metabolism	N
R00516	UTP:cytidine 5'-phosphotransferase	C00075[c] + C00475[c] --> C00015[c] + C00055[c]	(pvm:113803732) or (pvm:113803763)	pvm:113803732;pvm:113803763	rn00240	0	1000	0		2.7.1.48	Nucleotide metabolism	N
R00517	GTP:cytidine 5'-phosphotransferase	C00044[c] + C00475[c] --> C00035[c] + C00055[c]	(pvm:113803732) or (pvm:113803763)	pvm:113803732;pvm:113803763	rn00240	0	1000	0		2.7.1.48	Nucleotide metabolism	N
R00527	S-Formylglutathione hydrolase	C01031[c] + C00001[c] --> C00058[c] + C00051[c]	(pvm:113803366) or (pvm:113803397)	pvm:113803366;pvm:113803397	rn00680	0	1000	0		3.1.2.12	Energy metabolism	N
R00529	ATP:sulfate adenylyltransferase	C00002[c] + C00059[c] <=> C00013[c] + C00224[c]	(pvm:113829107)	pvm:113829107	rn00920	-1000	1000	0		2.7.7.4	Energy metabolism	Y
R00533	Sulfite:oxygen oxidoreductase	C00094[c] + C00007[c] + C00001[c] --> C00059[c] + C00027[c]	(pvm:113830432) or (pvm:113830447)	pvm:113830432;pvm:113830447	rn00920	0	1000	0		1.8.3.1	Energy metabolism	N
R00539	Acyl phosphate phosphohydrolase	C02133[c] + C00001[c] --> C00060[c] + C00009[c] + C00080[c]	(pvm:113803315)	pvm:113803315	rn00561	0	1000	0		3.6.1.7	Lipid metabolism	N
R00543	3-Acylpyruvate acylhydrolase	C02119[c] + C00001[c] --> C00060[c] + C00022[c] + C00080[c]	(pvm:113801170)	pvm:113801170	rn00010	0	1000	0		3.7.1.5	Carbohydrate metabolism	N
R00549	ATP:riboflavin 5'-phosphotransferase	C00002[c] + C00255[c] --> C00008[c] + C00061[c]	(pvm:113801067)	pvm:113801067	rn00740	0	1000	0		2.7.1.26	Metabolism of cofactors and vitamins	N
R00551	L-Arginine amidinohydrolase	C00062[c] + C00001[c] --> C00077[c] + C00086[c]	(pvm:113807721)	pvm:113807721	rn00220	0	1000	0		3.5.3.1	Amino acid metabolism	N
R00554	ATP:L-arginine Nomega-phosphotransferase	C00002[c] + C00062[c] --> C00008[c] + C05945[c]	(pvm:113818778) or (pvm:113818778)	pvm:113818778;pvm:113818778	rn00330	0	1000	0		2.7.3.3	Amino acid metabolism	N
R00557	L-arginine,NADPH:oxygen oxidoreductase (nitric-oxide-forming)	2 C00062[c] + 4 C00007[c] + 3 C00005[c] + 3 C00080[c] <=> 2 C00533[c] + 2 C00327[c] + 3 C00006[c] + 4 C00001[c]	(pvm:113828597) or (pvm:113828611)	pvm:113828597;pvm:113828611	rn00220	-1000	1000	0		1.14.13.39	Amino acid metabolism	Y
R00558	L-arginine,NADPH:oxygen oxidoreductase (N-(omega)-hydroxyarginine-forming)	C00062[c] + C00007[c] + C00005[c] + C00080[c] --> C05933[c] + C00006[c] + C00001[c]	(pvm:113828597) or (pvm:113828611)	pvm:113828597;pvm:113828611	rn00330	0	1000	0		1.14.13.39	Amino acid metabolism	N
R00569	CTP phosphohydrolase	C00063[c] + C00001[c] --> C00112[c] + C00009[c]	(pvm:113820751)	pvm:113820751	rn00240	0	1000	0		3.6.1.5	Nucleotide metabolism	N
R00570	ATP:CDP phosphotransferase	C00002[c] + C00112[c] <=> C00008[c] + C00063[c]	(pvm:113821087) or (pvm:113821105) or (pvm:113821107)	pvm:113821087;pvm:113821105;pvm:113821107	rn00240	-1000	1000	0		2.7.4.6	Nucleotide metabolism	Y
R00571	UTP:ammonia ligase (ADP-forming)	C00002[c] + C00075[c] + C00014[c] --> C00008[c] + C00009[c] + C00063[c]	(pvm:113820119)	pvm:113820119	rn00240	0	1000	0		6.3.4.2	Nucleotide metabolism	N
R00572	CTP:pyruvate 2-O-phosphotransferase	C00063[c] + C00022[c] --> C00112[c] + C00074[c]	(pvm:113802658) or (pvm:113802660)	pvm:113802658;pvm:113802660	rn00240	0	1000	0		2.7.1.40	Nucleotide metabolism	N
R00573	UTP:L-glutamine amido-ligase (ADP-forming)	C00002[c] + C00075[c] + C00064[c] + C00001[c] --> C00008[c] + C00009[c] + C00063[c] + C00025[c]	(pvm:113820119)	pvm:113820119	rn00240	0	1000	0		6.3.4.2	Nucleotide metabolism	N
R00575	HCO3-:L-glutamine amido-ligase (ADP-forming, carbamate-phosphorylating)	2 C00002[c] + C00064[c] + C00288[c] + C00001[c] + C00080[c] --> 2 C00008[c] + C00009[c] + C00025[c] + C00169[c]	(pvm:113827202)	pvm:113827202	rn00240	0	1000	0		6.3.5.5	Nucleotide metabolism	N
R00582	O-phospho-L-serine phosphohydrolase	C01005[c] + C00001[c] --> C00065[c] + C00009[c]	(pvm:113820062)	pvm:113820062	rn00260	0	1000	0		3.1.3.3	Amino acid metabolism	N
R00585	L-Serine:pyruvate aminotransferase	C00065[c] + C00022[c] <=> C00168[c] + C00041[c]	(pvm:113811233)	pvm:113811233	rn00260	-1000	1000	0		2.6.1.51	Amino acid metabolism	Y
R00588	L-Serine:glyoxylate aminotransferase	C00065[c] + C00048[c] <=> C00168[c] + C00037[c]	(pvm:113811197)	pvm:113811197	rn00260	-1000	1000	0		2.6.1.45	Amino acid metabolism	Y
R00590	L-serine hydro-lyase	C00065[c] --> C02218[c] + C00001[c]	(pvm:113817880)	pvm:113817880	rn00270	0	1000	0		4.3.1.17	Amino acid metabolism	N
R00597	S-adenosyl-L-methionine:tRNA guanine N1-methyltransferase;	C00019[c] + C01977[c] --> C00021[c] + C04157[c]	(pvm:113807660)	pvm:113807660	rn00270	0	1000	0		2.1.1.228	Amino acid metabolism	N
R00600	S-Adenosyl-L-methionine:tRNA guanine N7-methyltransferase;	C00019[c] + C01977[c] --> C00021[c] + C04160[c]	(pvm:113801845)	pvm:113801845	rn00261	0	1000	0		2.1.1.33	Biosynthesis of other secondary metabolites	N
R00610	sarcosine:oxygen oxidoreductase (demethylating)	C00213[c] + C00001[c] + C00007[c] --> C00037[c] + C00067[c] + C00027[c]	(pvm:113823540) or (pvm:113823545) or (pvm:113823550) or (pvm:113823573) or (pvm:113824668)	pvm:113823540;pvm:113823545;pvm:113823550;pvm:113823573;pvm:113824668	rn00260	0	1000	0		1.5.3.1	Amino acid metabolism	N
R00611	sarcosine:electron-transfer flavoprotein oxidoreductase (demethylating)	C00213[c] + C04253[c] + C00001[c] --> C00037[c] + C00067[c] + C04570[c]	(pvm:113829262) or (pvm:113829271)	pvm:113829262;pvm:113829271	rn00260	0	1000	0		1.5.8.3	Amino acid metabolism	N
R00619	ATP:thiamine diphosphotransferase	C00002[c] + C00378[c] --> C00020[c] + C00068[c]	(pvm:113824542)	pvm:113824542	rn00730	0	1000	0		2.7.6.2	Metabolism of cofactors and vitamins	N
R00621		C00026[c] + C00068[c] --> C05381[c] + C00011[c]	(pvm:113815367) or (pvm:113815379)	pvm:113815367;pvm:113815379	rn00020	0	1000	0		1.2.4.2	Carbohydrate metabolism	N
R00624	Secondary_alcohol:NAD+ oxidoreductase	C01612[c] + C00003[c] --> C01450[c] + C00004[c] + C00080[c]	(pvm:113824313) or (pvm:113806470)	pvm:113824313;pvm:113806470	rn00730	0	1000	0		1.1.1.1	Metabolism of cofactors and vitamins	N
R00630	Carboxylic-ester hydrolase	C02391[c] + C00001[c] --> C00069[c] + C00060[c] + C00080[c]	(pvm:113827729) or (pvm:113827743)	pvm:113827729;pvm:113827743	rn01100	0	1000	0		3.1.1.1	Global and overview maps	N
R00650	S-Adenosyl-L-methionine:L-homocysteine S-methyltransferase	C00019[c] + C00155[c] --> C00021[c] + C00073[c]	(pvm:113803089)	pvm:113803089	rn00270	0	1000	0		2.1.1.10	Amino acid metabolism	N
R00659	UTP:pyruvate 2-O-phosphotransferase	C00075[c] + C00022[c] --> C00015[c] + C00074[c]	(pvm:113802658) or (pvm:113802660)	pvm:113802658;pvm:113802660	rn00240	0	1000	0		2.7.1.40	Nucleotide metabolism	N
R00667	L-Ornithine:2-oxo-acid aminotransferase	C00077[c] + C00026[c] <=> C01165[c] + C00025[c]	(pvm:113800343)	pvm:113800343	rn00330	-1000	1000	0		2.6.1.13	Amino acid metabolism	Y
R00668	L-ornithine:2-oxoglutarate aminotransferase	C00077[c] + C00026[c] --> C04322[c] + C00025[c] + C00001[c]	(pvm:113800343)	pvm:113800343	rn00220	0	1000	0		2.6.1.13	Amino acid metabolism	N
R00670	L-ornithine carboxy-lyase (putrescine-forming)	C00077[c] --> C00134[c] + C00011[c]	(pvm:113804955)	pvm:113804955	rn00330	0	1000	0		4.1.1.17	Amino acid metabolism	N
R00703	(S)-Lactate:NAD+ oxidoreductase	C00186[c] + C00003[c] <=> C00022[c] + C00004[c] + C00080[c]	(pvm:113805256)	pvm:113805256	rn00010	-1000	1000	0		1.1.1.27	Carbohydrate metabolism	Y
R00706	3-Oxopropanoate:NADP+ oxidoreductase (decarboxylating, CoA-acetylating)	C00222[c] + C00010[c] + C00006[c] --> C00024[c] + C00011[c] + C00005[c] + C00080[c]	(pvm:113823845)	pvm:113823845	rn00410	0	1000	0		1.2.1.18	Metabolism of other amino acids	N
R00707	(S)-1-pyrroline-5-carboxylate:NAD+ oxidoreductase	C03912[c] + C00003[c] + 2 C00001[c] <=> C00025[c] + C00004[c] + C00080[c]	(pvm:113817770)	pvm:113817770	rn00250	-1000	1000	0		1.2.1.88	Amino acid metabolism	Y
R00708	(S)-1-pyrroline-5-carboxylate:NADP+ oxidoreductase	C03912[c] + C00006[c] + 2 C00001[c] <=> C00025[c] + C00005[c] + C00080[c]	(pvm:113817770)	pvm:113817770	rn00250	-1000	1000	0		1.2.1.88	Amino acid metabolism	Y
R00716	N6-(L-1,3-Dicarboxypropyl)-L-lysine:NADP+ oxidoreductase (L-lysine-forming)	C00449[c] + C00006[c] + C00001[c] --> C00047[c] + C00026[c] + C00005[c] + C00080[c]	(pvm:113823514) or (pvm:113823514)	pvm:113823514;pvm:113823514	rn00310	0	1000	0		1.5.1.8	Amino acid metabolism	N
R00722	ATP:IDP phosphotransferase	C00002[c] + C00104[c] <=> C00008[c] + C00081[c]	(pvm:113821087) or (pvm:113821105) or (pvm:113821107)	pvm:113821087;pvm:113821105;pvm:113821107	rn00230	-1000	1000	0		2.7.4.6	Nucleotide metabolism	Y
R00724	ITP:pyruvate 2-O-phosphotransferase	C00081[c] + C00022[c] --> C00104[c] + C00074[c]	(pvm:113802658) or (pvm:113802660)	pvm:113802658;pvm:113802660	rn00230	0	1000	0		2.7.1.40	Nucleotide metabolism	N
R00725	ITP:D-glucose 6-phosphotransferase	C00081[c] + C00267[c] --> C00104[c] + C00668[c]	(pvm:113813437) or (pvm:113813438)	pvm:113813437;pvm:113813438	rn00230	0	1000	0		2.7.1.1	Nucleotide metabolism	N
R00726	ITP:oxaloacetate carboxy-lyase (adding ITP; phosphoenolpyruvate-forming);	C00081[c] + C00036[c] <=> C00104[c] + C00074[c] + C00011[c]	(pvm:113814032) or (pvm:113814032) or (pvm:113814039)	pvm:113814032;pvm:113814032;pvm:113814039	rn00620	-1000	1000	0		4.1.1.32	Carbohydrate metabolism	Y
R00727	Succinate:CoA ligase (IDP-forming)	C00081[c] + C00042[c] + C00010[c] <=> C00104[c] + C00009[c] + C00091[c]	(pvm:113824470) or (pvm:113802516) or (pvm:113803627) or (pvm:113804700)	pvm:113824470;pvm:113802516;pvm:113803627;pvm:113804700	rn00020	-1000	1000	0		6.2.1.4	Carbohydrate metabolism	Y
R00731	L-Tyrosine:oxygen oxidoreductase	C00082[c] + C00007[c] + 2 C00080[c] + 2 C05359[c] --> C00355[c] + C00001[c]	(pvm:113813169)	pvm:113813169	rn00350	0	1000	0		1.14.18.1	Amino acid metabolism	N
R00748	ethanolamine-phosphate phosphate-lyase (deaminating; acetaldehyde-forming)	C00346[c] + C00001[c] --> C00084[c] + C00014[c] + C00009[c]	(pvm:113827918) or (pvm:113830205) or (pvm:113800047) or (pvm:113800052)	pvm:113827918;pvm:113830205;pvm:113800047;pvm:113800052	rn00564	0	1000	0		4.2.3.2	Lipid metabolism	N
R00763	beta-D-fructose-2,6-bisphosphate 2-phosphohydrolase	C00665[c] + C00001[c] --> C05345[c] + C00009[c]	(pvm:113806787) or (pvm:113806828)	pvm:113806787;pvm:113806828	rn00051	0	1000	0		3.1.3.46	Carbohydrate metabolism	N
R00765	D-glucosamine-6-phosphate aminohydrolase (ketol isomerizing);	C00352[c] + C00001[c] --> C05345[c] + C00014[c]	(pvm:113802200)	pvm:113802200	rn00520	0	1000	0		3.5.99.6	Carbohydrate metabolism	N
R00767	CTP:D-fructose-6-phosphate 1-phosphotransferase	C00063[c] + C00085[c] --> C00112[c] + C00354[c]	(pvm:113815914) or (pvm:113815919)	pvm:113815914;pvm:113815919	rn00240	0	1000	0		2.7.1.11	Nucleotide metabolism	N
R00768	L-glutamine:D-fructose-6-phosphate isomerase (deaminating);	C00064[c] + C05345[c] --> C00025[c] + C00352[c]	(pvm:113801904)	pvm:113801904	rn00250	0	1000	0		2.6.1.16	Amino acid metabolism	N
R00769	UTP:D-fructose-6-phosphate 1-phosphotransferase	C00075[c] + C00085[c] --> C00015[c] + C00354[c]	(pvm:113815914) or (pvm:113815919)	pvm:113815914;pvm:113815919	rn00240	0	1000	0		2.7.1.11	Nucleotide metabolism	N
R00770	ITP:D-fructose-6-phosphate 1-phosphotransferase	C00081[c] + C00085[c] --> C00104[c] + C00354[c]	(pvm:113815914) or (pvm:113815919)	pvm:113815914;pvm:113815919	rn00230	0	1000	0		2.7.1.11	Nucleotide metabolism	N
R00814	trans-1,2-dihydrobenzene-1,2-diol:NADP+ oxidoreductase	C04221[c] + C00006[c] --> C00090[c] + C00005[c] + C00080[c]	(pvm:113817902) or (pvm:113817903)	pvm:113817902;pvm:113817903	rn00480	0	1000	0		1.3.1.20	Metabolism of other amino acids	N
R00830	succinyl-CoA:glycine C-succinyltransferase (decarboxylating)	C00091[c] + C00037[c] --> C00430[c] + C00010[c] + C00011[c]	(pvm:113815688) or (pvm:113815694)	pvm:113815688;pvm:113815694	rn00260	0	1000	0		2.3.1.37	Amino acid metabolism	N
R00833	(R)-Methylmalonyl-CoA CoA-carbonylmutase	C01213[c] <=> C00091[c]	(pvm:113822923)	pvm:113822923	rn00280	-1000	1000	0		5.4.99.2	Amino acid metabolism	Y
R00847	ATP:glycerol 3-phosphotransferase	C00002[c] + C00116[c] --> C00008[c] + C00093[c]	(pvm:113801071) or (pvm:113802608)	pvm:113801071;pvm:113802608	rn00561	0	1000	0		2.7.1.30	Lipid metabolism	N
R00848	sn-Glycerol-3-phosphate:(acceptor) 2-oxidoreductase	C00093[c] + C00016[c] <=> C00111[c] + C01352[c]	(pvm:113827608) or (pvm:113827616)	pvm:113827608;pvm:113827616	rn00564	-1000	1000	0		1.1.5.3	Lipid metabolism	Y
R00849	sn-glycerol 3-phosphate:quinone oxidoreductase	C00093[c] + C15602[c] --> C00111[c] + C15603[c]	(pvm:113827608) or (pvm:113827616)	pvm:113827608;pvm:113827616	rn00010	0	1000	0		1.1.5.3	Carbohydrate metabolism	N
R00851	acyl-CoA:sn-glycerol-3-phosphate 1-O-acyltransferase	C00093[c] + C00040[c] --> C00681[c] + C00010[c]	(pvm:113823998) or (pvm:113824028) or (pvm:113824041) or (pvm:113824052) or (pvm:113824062) or (pvm:113824063)	pvm:113823998;pvm:113824028;pvm:113824041;pvm:113824052;pvm:113824062;pvm:113824063	rn00561	0	1000	0		2.3.1.15	Lipid metabolism	N
R00866	ATP:D-fructose 1-phosphotransferase	C00002[c] + C02336[c] --> C00008[c] + C01094[c]	(pvm:113801069) or (pvm:113801069)	pvm:113801069;pvm:113801069	rn00051	0	1000	0		2.7.1.3	Carbohydrate metabolism	N
R00876	ITP:D-fructose 6-phosphotransferase	C00081[c] + C02336[c] --> C00104[c] + C05345[c]	(pvm:113813437) or (pvm:113813438)	pvm:113813437;pvm:113813438	rn00230	0	1000	0		2.7.1.1	Nucleotide metabolism	N
R00878	alpha-D-Glucose aldose-ketose-isomerase	C00267[c] <=> C02336[c]	(pvm:113800179) or (pvm:113800184) or (pvm:113806240) or (pvm:113807483) or (pvm:113810916)	pvm:113800179;pvm:113800184;pvm:113806240;pvm:113807483;pvm:113810916	rn00051	-1000	1000	0		5.3.1.5	Carbohydrate metabolism	Y
R00885	GTP:alpha-D-mannose-1-phosphate guanylyltransferase	C00044[c] + C00636[c] --> C00013[c] + C00096[c]	(pvm:113825724) or (pvm:113825741) or (pvm:113826831)	pvm:113825724;pvm:113825741;pvm:113826831	rn00051	0	1000	0		2.7.7.13	Carbohydrate metabolism	N
R00888	GDP-alpha-D-mannose 4,6-hydro-lyase (GDP-4-dehydro-alpha-D-rhamnose-forming);	C00096[c] --> C01222[c] + C00001[c]	(pvm:113823290)	pvm:113823290	rn00051	0	1000	0		4.2.1.47	Carbohydrate metabolism	N
R00891	L-serine hydro-lyase (adding hydrogen sulfide, L-cysteine-forming)	C00065[c] + C00283[c] --> C00097[c] + C00001[c]	(pvm:113818694)	pvm:113818694	rn00260	0	1000	0		4.2.1.22	Amino acid metabolism	N
R00893	L-Cysteine:oxygen oxidoreductase	C00097[c] + C00007[c] --> C00606[c]	(pvm:113808580)	pvm:113808580	rn00270	0	1000	0		1.13.11.20	Amino acid metabolism	N
R00894	L-glutamate:L-cysteine gamma-ligase (ADP-forming)	C00002[c] + C00025[c] + C00097[c] --> C00008[c] + C00009[c] + C00669[c]	(pvm:113817683)	pvm:113817683	rn00480	0	1000	0		6.3.2.2	Metabolism of other amino acids	N
R00896	L-cysteine:2-oxoglutarate aminotransferase	C00097[c] + C00026[c] <=> C00957[c] + C00302[c]	(pvm:113805416) or (pvm:113805442)	pvm:113805416;pvm:113805442	rn00270	-1000	1000	0		2.6.1.1	Amino acid metabolism	Y
R00905	3-ureidopropanoate amidohydrolase	C02642[c] + C00001[c] <=> C00099[c] + C00011[c] + C00014[c]	(pvm:113828695)	pvm:113828695	rn00410	-1000	1000	0		3.5.1.6	Metabolism of other amino acids	Y
R00922	2-Methyl-3-oxopropanoate:NAD+ oxidoreductase (CoA-propanoylating)	C00349[c] + C00010[c] + C00003[c] --> C00100[c] + C00011[c] + C00004[c] + C00080[c]	(pvm:113824986)	pvm:113824986	rn00280	0	1000	0		1.2.1.27	Amino acid metabolism	N
R00935	(S)-Methylmalonate semialdehyde:NAD+ oxidoreductase (CoA-propanoylating)	C06002[c] + C00010[c] + C00003[c] --> C00100[c] + C00011[c] + C00004[c] + C00080[c]	(pvm:113824986)	pvm:113824986	rn00640	0	1000	0		1.2.1.27	Carbohydrate metabolism	N
R00936	5,6,7,8-tetrahydrofolate:NAD+ oxidoreductase	C00101[c] + C00003[c] <=> C00415[c] + C00004[c] + C00080[c]	(pvm:113821217)	pvm:113821217	rn00670	-1000	1000	0		1.5.1.3	Metabolism of cofactors and vitamins	Y
R00937	5,6,7,8-tetrahydrofolate:NAD+ oxidoreductase	C00101[c] + 2 C00003[c] --> C00504[c] + 2 C00004[c] + 2 C00080[c]	(pvm:113821217)	pvm:113821217	rn00670	0	1000	0		1.5.1.3	Metabolism of cofactors and vitamins	N
R00939	5,6,7,8-tetrahydrofolate:NADP+ oxidoreductase	C00101[c] + C00006[c] <=> C00415[c] + C00005[c] + C00080[c]	(pvm:113821217)	pvm:113821217	rn00790	-1000	1000	0		1.5.1.3	Metabolism of cofactors and vitamins	Y
R00940	5,6,7,8-tetrahydrofolate:NADP+ oxidoreductase	C00101[c] + 2 C00006[c] --> C00504[c] + 2 C00005[c] + 2 C00080[c]	(pvm:113821217)	pvm:113821217	rn00670	0	1000	0		1.5.1.3	Metabolism of cofactors and vitamins	N
R00941	10-formyltetrahydrofolate:NADP+ oxidoreductase	C00234[c] + C00006[c] + C00001[c] --> C00101[c] + C00011[c] + C00005[c] + C00080[c]	(pvm:113822421)	pvm:113822421	rn00670	0	1000	0		1.5.1.6	Metabolism of cofactors and vitamins	N
R00942	Tetrahydrofolate:L-glutamate gamma-ligase (ADP-forming)	C00002[c] + C00101[c] + C00025[c] <=> C00008[c] + C00009[c] + C09332[c]	(pvm:113815113)	pvm:113815113	rn00790	-1000	1000	0		6.3.2.17	Metabolism of cofactors and vitamins	Y
R00943	Formate:tetrahydrofolate ligase (ADP-forming)	C00101[c] + C00058[c] + C00002[c] --> C00008[c] + C00009[c] + C00234[c]	(pvm:113810720) or (pvm:113817865)	pvm:113810720;pvm:113817865	rn00720	0	1000	0		6.3.4.3	Energy metabolism	N
R00945	5,10-Methylenetetrahydrofolate:glycine hydroxymethyltransferase	C00143[c] + C00037[c] + C00001[c] <=> C00101[c] + C00065[c]	(pvm:113820593) or (pvm:113820596)	pvm:113820593;pvm:113820596	rn00260	-1000	1000	0		2.1.2.1	Amino acid metabolism	Y
R00946	5-methyltetrahydrofolate:L-homocysteine S-methyltransferase	C00440[c] + C00155[c] <=> C00101[c] + C00073[c]	(pvm:113804255)	pvm:113804255	rn00670	-1000	1000	0		2.1.1.13	Metabolism of cofactors and vitamins	Y
R00955	UDP-glucose:alpha-D-galactose-1-phosphate uridylyltransferase	C00029[c] + C00446[c] <=> C00103[c] + C00052[c]	(pvm:113825690)	pvm:113825690	rn00052	-1000	1000	0		2.7.7.12	Carbohydrate metabolism	Y
R00962	ITP:cytidine 5'-phosphotransferase	C00081[c] + C00475[c] --> C00104[c] + C00055[c]	(pvm:113803732) or (pvm:113803763)	pvm:113803732;pvm:113803763	rn00240	0	1000	0		2.7.1.48	Nucleotide metabolism	N
R00963	uridine 5'-monophosphate phosphohydrolase	C00105[c] + C00001[c] --> C00299[c] + C00009[c]	(pvm:113810309) or (pvm:113810321) or (pvm:113810336) or (pvm:113811537)	pvm:113810309;pvm:113810321;pvm:113810336;pvm:113811537	rn00240	0	1000	0		3.1.3.5	Nucleotide metabolism	N
R00965	orotidine-5'-phosphate carboxy-lyase (UMP-forming)	C01103[c] --> C00105[c] + C00011[c]	(pvm:113812937)	pvm:113812937	rn00240	0	1000	0		4.1.1.23	Nucleotide metabolism	N
R00966	UMP:diphosphate phospho-alpha-D-ribosyltransferase	C00105[c] + C00013[c] <=> C00106[c] + C00119[c]	(pvm:113819574) or (pvm:113819630)	pvm:113819574;pvm:113819630	rn00240	-1000	1000	0		2.4.2.9	Nucleotide metabolism	Y
R00967	UTP:uridine 5'-phosphotransferase	C00075[c] + C00299[c] --> C00015[c] + C00105[c]	(pvm:113803732) or (pvm:113803763)	pvm:113803732;pvm:113803763	rn00240	0	1000	0		2.7.1.48	Nucleotide metabolism	N
R00968	GTP:uridine 5'-phosphotransferase	C00044[c] + C00299[c] --> C00035[c] + C00105[c]	(pvm:113803732) or (pvm:113803763)	pvm:113803732;pvm:113803763	rn00240	0	1000	0		2.7.1.48	Nucleotide metabolism	N
R00969	P1,P4-bis(5'-uridyl)-tetraphosphate uridylohydrolase	C06198[c] + C00001[c] --> C00075[c] + C00105[c]	(pvm:113813496)	pvm:113813496	rn00240	0	1000	0		3.6.1.17	Nucleotide metabolism	N
R00970	ITP:uridine 5'-phosphotransferase	C00081[c] + C00299[c] --> C00104[c] + C00105[c]	(pvm:113803732) or (pvm:113803763)	pvm:113803732;pvm:113803763	rn00240	0	1000	0		2.7.1.48	Nucleotide metabolism	N
R00978	5,6-Dihydrouracil:NADP+ oxidoreductase	C00429[c] + C00006[c] <=> C00106[c] + C00005[c] + C00080[c]	(pvm:113817899)	pvm:113817899	rn00240	-1000	1000	0		1.3.1.2	Nucleotide metabolism	Y
R00987	L-Kynurenine hydrolase	C00328[c] + C00001[c] --> C00108[c] + C00041[c]	(pvm:113799986)	pvm:113799986	rn00380	0	1000	0		3.7.1.3	Amino acid metabolism	N
R00996	L-threonine ammonia-lyase (2-oxobutanoate-forming)	C00188[c] --> C00109[c] + C00014[c]	(pvm:113818996)	pvm:113818996	rn00260	0	1000	0		4.3.1.19	Amino acid metabolism	N
R01000	2-hydroxybutyrate:NAD+ oxidoreductase	C05984[c] + C00003[c] <=> C00109[c] + C00004[c] + C00080[c]	(pvm:113805256)	pvm:113805256	rn00640	-1000	1000	0		1.1.1.27	Carbohydrate metabolism	Y
R01001	L-cystathionine cysteine-lyase (deaminating; 2-oxobutanoate-forming)	C02291[c] + C00001[c] <=> C00097[c] + C00014[c] + C00109[c]	(pvm:113829361)	pvm:113829361	rn00270	-1000	1000	0		4.4.1.1	Amino acid metabolism	Y
R01004	Dolichyl-diphosphate phosphohydrolase	C00621[c] + C00001[c] --> C00110[c] + C00009[c]	(pvm:113820742)	pvm:113820742	rn00510	0	1000	0		3.6.1.43	Glycan biosynthesis and metabolism	N
R01005	UDPglucose:dolichyl-phosphate beta-D-glucosyltransferase	C00029[c] + C00110[c] --> C00015[c] + C01246[c]	(pvm:113815316) or (pvm:113815316)	pvm:113815316;pvm:113815316	rn00510	0	1000	0		2.4.1.117	Glycan biosynthesis and metabolism	N
R01007	UDP-N-acetyl-D-glucosamine:dolichyl-phosphate N-acetyl-D-glucosamine phosphotransferase	C00043[c] + C00110[c] --> C00105[c] + C04500[c]	(pvm:113824291)	pvm:113824291	rn00240	0	1000	0		2.7.8.15	Nucleotide metabolism	N
R01009	GDPmannose:dolichyl-phosphate O-beta-D-mannosyltransferase	C00096[c] + C00110[c] --> C00035[c] + C03862[c]	(pvm:113807830)	pvm:113807830	rn00510	0	1000	0		2.4.1.83	Glycan biosynthesis and metabolism	N
R01013	Acyl-CoA:glycerone-phosphate O-acyltransferase	C00040[c] + C00111[c] --> C00010[c] + C03372[c]	(pvm:113816963)	pvm:113816963	rn00564	0	1000	0		2.3.1.42	Lipid metabolism	N
R01015	D-glyceraldehyde-3-phosphate aldose-ketose-isomerase	C00118[c] <=> C00111[c]	(pvm:113822471) or (pvm:113824803) or (pvm:113827051) or (pvm:113828234) or (pvm:113800041) or (pvm:113805011) or (pvm:113805021) or (pvm:113808480) or (pvm:113809548) or (pvm:113810731) or (pvm:113810738) or (pvm:113811866) or (pvm:113820242) or (pvm:113824842) or (pvm:113825971) or (pvm:113825972) or (pvm:113827133) or (pvm:113802857) or (pvm:113803991) or (pvm:113807408) or (pvm:113810833) or …	pvm:113822471;pvm:113824803;pvm:113827051;pvm:113828234;pvm:113800041;pvm:113805011;pvm:113805021;pvm:113808480;pvm:113809548;pvm:113810731;pvm:113810738;pvm:113811866;pvm:113820242;pvm:113824842;pvm:113825971;pvm:113825972;pvm:113827133;pvm:113802857;pvm:113803991;pvm:113807408;pvm:113810833;pvm:113815486;pvm:113821451	rn00010	-1000	1000	0		5.3.1.1	Carbohydrate metabolism	Y
R01018	CTP:dolichol O-phosphotransferase	C00063[c] + C00381[c] --> C00112[c] + C00110[c]	(pvm:113815914)	pvm:113815914	rn00510	0	1000	0		2.7.1.108	Glycan biosynthesis and metabolism	N
R01021	ATP:choline phosphotransferase	C00002[c] + C00114[c] --> C00008[c] + C00588[c]	(pvm:113802608)	pvm:113802608	rn00564	0	1000	0		2.7.1.32	Lipid metabolism	N
R01023	Acetyl-CoA:choline O-acetyltransferase	C00024[c] + C00114[c] --> C00010[c] + C01996[c]	(pvm:113826307)	pvm:113826307	rn00564	0	1000	0		2.3.1.6	Lipid metabolism	N
R01025	choline:acceptor 1-oxidoreductase	C00114[c] + C00028[c] --> C00576[c] + C00030[c]	(pvm:113827622) or (pvm:113829809) or (pvm:113829822) or (pvm:113829842) or (pvm:113800021) or (pvm:113800031) or (pvm:113800048) or (pvm:113800054)	pvm:113827622;pvm:113829809;pvm:113829822;pvm:113829842;pvm:113800021;pvm:113800031;pvm:113800048;pvm:113800054	rn00260	0	1000	0		1.1.99.1	Amino acid metabolism	N
R01049	ATP:D-ribose-5-phosphate diphosphotransferase	C00002[c] + C00117[c] --> C00020[c] + C00119[c]	(pvm:113823424)	pvm:113823424	rn00230	0	1000	0		2.7.6.1	Nucleotide metabolism	N
R01051	ATP:D-ribose 5-phosphotransferase	C00002[c] + C00121[c] <=> C00008[c] + C00117[c]	(pvm:113818305)	pvm:113818305	rn00030	-1000	1000	0		2.7.1.15	Carbohydrate metabolism	Y
R01055	uracil hydro-lyase (adding D-ribose 5-phosphate;pseudouridine-5'-phosphate-forming)	C00106[c] + C00117[c] <=> C01168[c] + C00001[c]	(pvm:113825628) or (pvm:113825650)	pvm:113825628;pvm:113825650	rn00240	-1000	1000	0		4.2.1.70	Nucleotide metabolism	Y
R01056	D-ribose-5-phosphate aldose-ketose-isomerase	C00117[c] <=> C00199[c]	(pvm:113813149)	pvm:113813149	rn00030	-1000	1000	0		5.3.1.6	Carbohydrate metabolism	Y
R01066	2-deoxy-D-ribose-5-phosphate acetaldehyde-lyase (D-glyceraldehyde-3-phosphate-forming)	C00673[c] <=> C00118[c] + C00084[c]	(pvm:113828239)	pvm:113828239	rn00030	-1000	1000	0		4.1.2.4	Carbohydrate metabolism	Y
R01070	beta-D-fructose-1,6-bisphosphate D-glyceraldehyde-3-phosphate-lyase (glycerone-phosphate-forming)	C05378[c] <=> C00111[c] + C00118[c]	(pvm:113820161) or (pvm:113821322)	pvm:113820161;pvm:113821322	rn00010	-1000	1000	0		4.1.2.13	Carbohydrate metabolism	Y
R01072	5-phosphoribosylamine:diphosphate phospho-alpha-D-ribosyltransferase (glutamate-amidating)	C03090[c] + C00013[c] + C00025[c] --> C00064[c] + C00119[c] + C00001[c]	(pvm:113811303)	pvm:113811303	rn00230	0	1000	0		2.4.2.14	Nucleotide metabolism	N
R01082	(S)-malate hydro-lyase (fumarate-forming)	C00149[c] <=> C00122[c] + C00001[c]	(pvm:113817518)	pvm:113817518	rn00020	-1000	1000	0		4.2.1.2	Carbohydrate metabolism	Y
R01083	N6-(1,2-dicarboxyethyl)AMP AMP-lyase (fumarate-forming)	C03794[c] --> C00122[c] + C00020[c]	(pvm:113820224)	pvm:113820224	rn00230	0	1000	0		4.3.2.2	Nucleotide metabolism	N
R01086	2-(Nomega-L-arginino)succinate arginine-lyase (fumarate-forming)	C03406[c] --> C00122[c] + C00062[c]	(pvm:113820203)	pvm:113820203	rn00220	0	1000	0		4.3.2.1	Amino acid metabolism	N
R01092	ATP:alpha-D-galactose 1-phosphotransferase	C00002[c] + C00984[c] --> C00008[c] + C00446[c]	(pvm:113804867)	pvm:113804867	rn00052	0	1000	0		2.7.1.6	Carbohydrate metabolism	N
R01105	Galactan galactohydrolase	C05796[c] + C00001[c] --> C00124[c] + C05796[c]	(pvm:113823164)	pvm:113823164	rn00052	0	1000	0		3.2.1.23	Carbohydrate metabolism	N
R01117	CTP:N-acetylneuraminate cytidylyltransferase	C00063[c] + C00270[c] <=> C00013[c] + C00128[c]	(pvm:113829124)	pvm:113829124	rn00520	-1000	1000	0		2.7.7.43	Carbohydrate metabolism	Y
R01121	ATP:(R)-5-diphosphomevalonate carboxy-lyase (adding ATP; isopentenyl-diphosphate-forming);	C00002[c] + C01143[c] --> C00008[c] + C00009[c] + C00129[c] + C00011[c]	(pvm:113814087)	pvm:113814087	rn00900	0	1000	0		4.1.1.33	Metabolism of terpenoids and polyketides	N
R01122	delta2-isopentenyl-diphosphate:tRNA isopentenyltransferase	C00235[c] + C17324[c] --> C00013[c] + C04432[c]	(pvm:113803192) or (pvm:113803192)	pvm:113803192;pvm:113803192	rn00908	0	1000	0		2.5.1.75	Metabolism of terpenoids and polyketides	N
R01123	Isopentenyl-diphosphate delta3-delta2-isomerase	C00129[c] <=> C00235[c]	(pvm:113818036)	pvm:113818036	rn00900	-1000	1000	0		5.3.3.2	Metabolism of terpenoids and polyketides	Y
R01127	IMP 1,2-hydrolase (decyclizing)	C00130[c] + C00001[c] <=> C04734[c]	(pvm:113808882) or (pvm:113809985)	pvm:113808882;pvm:113809985	rn00230	-1000	1000	0		3.5.4.10	Nucleotide metabolism	Y
R01130	IMP:NAD+ oxidoreductase	C00130[c] + C00003[c] + C00001[c] --> C00655[c] + C00004[c] + C00080[c]	(pvm:113800167)	pvm:113800167	rn00230	0	1000	0		1.1.1.205	Nucleotide metabolism	N
R01132	IMP:diphosphate phospho-D-ribosyltransferase	C00130[c] + C00013[c] <=> C00262[c] + C00119[c]	(pvm:113818431) or (pvm:113819550)	pvm:113818431;pvm:113819550	rn00230	-1000	1000	0		2.4.2.8	Nucleotide metabolism	Y
R01134	inosine-5'-phosphate:NADP+ oxidoreductase (aminating);	C00130[c] + C00014[c] + C00006[c] --> C00144[c] + C00005[c] + C00080[c]	(pvm:113828312)	pvm:113828312	rn00230	0	1000	0		1.7.1.7	Nucleotide metabolism	N
R01135	IMP:L-aspartate ligase (GDP-forming)	C00044[c] + C00130[c] + C00049[c] --> C00035[c] + C00009[c] + C03794[c]	(pvm:113801198)	pvm:113801198	rn00230	0	1000	0		6.3.4.4	Nucleotide metabolism	N
R01137	ATP:dADP phosphotransferase	C00002[c] + C00206[c] <=> C00008[c] + C00131[c]	(pvm:113821087) or (pvm:113821105) or (pvm:113821107)	pvm:113821087;pvm:113821105;pvm:113821107	rn00230	-1000	1000	0		2.7.4.6	Nucleotide metabolism	Y
R01138	dATP:pyruvate 2-O-phosphotransferase	C00131[c] + C00022[c] <=> C00206[c] + C00074[c]	(pvm:113802658) or (pvm:113802660)	pvm:113802658;pvm:113802660	rn00230	-1000	1000	0		2.7.1.40	Nucleotide metabolism	Y
R01139	dATP:D-glucose 6-phosphotransferase	C00131[c] + C00267[c] --> C00206[c] + C00668[c]	(pvm:113813437) or (pvm:113813438)	pvm:113813437;pvm:113813438	rn00230	0	1000	0		2.7.1.1	Nucleotide metabolism	N
R01140	dATP:D-fructose 6-phosphotransferase	C00131[c] + C02336[c] --> C00206[c] + C05345[c]	(pvm:113813437) or (pvm:113813438)	pvm:113813437;pvm:113813438	rn00230	0	1000	0		2.7.1.1	Nucleotide metabolism	N
R01157	Agmatine amidinohydrolase	C00179[c] + C00001[c] --> C00134[c] + C00086[c]	(pvm:113808830)	pvm:113808830	rn00330	0	1000	0		3.5.3.11	Amino acid metabolism	N
R01168	L-histidine ammonia-lyase (urocanate-forming)	C00135[c] --> C00785[c] + C00014[c]	(pvm:113819001)	pvm:113819001	rn00340	0	1000	0		4.3.1.3	Amino acid metabolism	N
R01176	Butanoate:CoA ligase (AMP-forming)	C00002[c] + C00246[c] + C00010[c] --> C00020[c] + C00013[c] + C00136[c]	(pvm:113818601) or (pvm:113818601) or (pvm:113818601)	pvm:113818601;pvm:113818601;pvm:113818601	rn00650	0	1000	0		6.2.1.2	Carbohydrate metabolism	N
R01184	myo-Inositol:oxygen oxidoreductase	C00137[c] + C00007[c] --> C00191[c] + C00001[c]	(pvm:113819336) or (pvm:113819337)	pvm:113819336;pvm:113819337	rn00053	0	1000	0		1.13.99.1	Carbohydrate metabolism	N
R01185	1D-myo-inositol 1-phosphate phosphohydrolase	C01177[c] + C00001[c] --> C00137[c] + C00009[c]	(pvm:113820052)	pvm:113820052	rn00562	0	1000	0		3.1.3.25	Carbohydrate metabolism	N
R01186	1D-myo-inositol 4-phosphate phosphohydrolase	C03546[c] + C00001[c] --> C00137[c] + C00009[c]	(pvm:113820052)	pvm:113820052	rn00562	0	1000	0		3.1.3.25	Carbohydrate metabolism	N
R01187	1D-myo-inositol 3-phosphate phosphohydrolase	C04006[c] + C00001[c] --> C00137[c] + C00009[c]	(pvm:113820052)	pvm:113820052	rn00521	0	1000	0		3.1.3.25	Biosynthesis of other secondary metabolites	N
R01201	ATP:N-acetyl-D-glucosamine 6-phosphotransferase	C00002[c] + C00140[c] --> C00008[c] + C00357[c]	(pvm:113803765) or (pvm:113803774)	pvm:113803765;pvm:113803774	rn00520	0	1000	0		2.7.1.59	Carbohydrate metabolism	N
R01205	UDP-alpha-D-galactose:N-acetyl-D-glucosamine 4-beta-D-galactosyltransferase	C00052[c] + C00140[c] --> C00015[c] + C00611[c]	(pvm:113808973) or (pvm:113809990) or (pvm:113809991) or (pvm:113809993) or (pvm:113809994) or (pvm:113810036)	pvm:113808973;pvm:113809990;pvm:113809991;pvm:113809993;pvm:113809994;pvm:113810036	rn00052	0	1000	0		2.4.1.90	Carbohydrate metabolism	N
R01206	[1,4-(N-Acetyl-beta-D-glucosaminyl)]n glycanohydrolase	C00461[c] + C00001[c] --> C00140[c] + C00461[c]	(pvm:113830326) or (pvm:113830326) or (pvm:113830327) or (pvm:113830338) or (pvm:113830345) or (pvm:113830347) or (pvm:113830349) or (pvm:113830370) or (pvm:113817379) or (pvm:113817380) or (pvm:113817395) or (pvm:113817398) or (pvm:113817408) or (pvm:113817415) or (pvm:113817416) or (pvm:113818503) or (pvm:113818504) or (pvm:113818535) or (pvm:113818542) or (pvm:113818563) or (pvm:113818567) or …	pvm:113830326;pvm:113830326;pvm:113830327;pvm:113830338;pvm:113830345;pvm:113830347;pvm:113830349;pvm:113830370;pvm:113817379;pvm:113817380;pvm:113817395;pvm:113817398;pvm:113817408;pvm:113817415;pvm:113817416;pvm:113818503;pvm:113818504;pvm:113818535;pvm:113818542;pvm:113818563;pvm:113818567;pvm:113819729;pvm:113819738;pvm:113819759;pvm:113819760	rn00520	0	1000	0		3.2.1.14	Carbohydrate metabolism	N
R01218	5,10-methylenetetrahydrofolate:NAD+ oxidoreductase	C00143[c] + C00003[c] <=> C00445[c] + C00004[c]	(pvm:113820074)	pvm:113820074	rn00670	-1000	1000	0		1.5.1.15	Metabolism of cofactors and vitamins	Y
R01220	5,10-methylenetetrahydrofolate:NADP+ oxidoreductase	C00143[c] + C00006[c] <=> C00445[c] + C00005[c]	(pvm:113822383) or (pvm:113822409)	pvm:113822383;pvm:113822409	rn00670	-1000	1000	0		1.5.1.5	Metabolism of cofactors and vitamins	Y
R01224	5-methyltetrahydrofolate:NADP+ oxidoreductase	C00440[c] + C00006[c] --> C00143[c] + C00005[c] + C00080[c]	(pvm:113820096)	pvm:113820096	rn00670	0	1000	0		1.5.1.20	Metabolism of cofactors and vitamins	N
R01227	guanosine 5'-monophosphate phosphohydrolase	C00144[c] + C00001[c] --> C00387[c] + C00009[c]	(pvm:113810309) or (pvm:113810321) or (pvm:113810336) or (pvm:113811537)	pvm:113810309;pvm:113810321;pvm:113810336;pvm:113811537	rn00230	0	1000	0		3.1.3.5	Nucleotide metabolism	N
R01230	Xanthosine-5'-phosphate:ammonia ligase (AMP-forming)	C00002[c] + C00655[c] + C00014[c] --> C00020[c] + C00013[c] + C00144[c]	(pvm:113805059)	pvm:113805059	rn00230	0	1000	0		6.3.5.2	Nucleotide metabolism	N
R01231	Xanthosine-5'-phosphate:L-glutamine amido-ligase (AMP-forming)	C00002[c] + C00655[c] + C00064[c] + C00001[c] --> C00020[c] + C00013[c] + C00144[c] + C00025[c]	(pvm:113805059)	pvm:113805059	rn00230	0	1000	0		6.3.5.2	Nucleotide metabolism	N
R01232	P1,P4-bis(5'-guanosyl)-tetraphosphate guanylylhydrolase	C01261[c] + C00001[c] --> C00044[c] + C00144[c]	(pvm:113813496)	pvm:113813496	rn00230	0	1000	0		3.6.1.17	Nucleotide metabolism	N
R01248	L-Proline:NAD+ 5-oxidoreductase	C00148[c] + C00003[c] <=> C03912[c] + C00004[c] + C00080[c]	(pvm:113820086) or (pvm:113820089)	pvm:113820086;pvm:113820089	rn00330	-1000	1000	0		1.5.1.2	Amino acid metabolism	Y
R01251	L-Proline:NADP+ 5-oxidoreductase	C00148[c] + C00006[c] <=> C03912[c] + C00005[c] + C00080[c]	(pvm:113820086) or (pvm:113820089)	pvm:113820086;pvm:113820089	rn00330	-1000	1000	0		1.5.1.2	Amino acid metabolism	Y
R01253	L-proline:quinone oxidoreductase	C00148[c] + C15602[c] --> C03912[c] + C15603[c]	(pvm:113829236)	pvm:113829236	rn00330	0	1000	0		1.5.5.2	Amino acid metabolism	N
R01262	glutathione:L-amino-acid 5-glutamyltransferase	C00051[c] + C00151[c] --> C01419[c] + C03740[c]	(pvm:113801114) or (pvm:113801149)	pvm:113801114;pvm:113801149	rn00480	0	1000	0		2.3.2.2	Metabolism of other amino acids	N
R01263	N-Acyl-L-amino-acid amidohydrolase	C02850[c] + C00001[c] --> C00060[c] + C00151[c] + C00080[c]	(pvm:113821725) or (pvm:113822901)	pvm:113821725;pvm:113822901	rn00480	0	1000	0		3.5.1.14	Metabolism of other amino acids	N
R01271	nicotinamide-D-ribonucleotide:diphosphate phospho-alpha-D-ribosyltransferase	C00455[c] + C00013[c] <=> C00153[c] + C00119[c]	(pvm:113811259) or (pvm:113811284)	pvm:113811259;pvm:113811284	rn00760	-1000	1000	0		2.4.2.12	Metabolism of cofactors and vitamins	Y
R01280	Palmitate:CoA ligase (AMP-forming)	C00002[c] + C00249[c] + C00010[c] <=> C00020[c] + C00154[c] + C00013[c]	(pvm:113827912) or (pvm:113804690) or (pvm:113808128) or (pvm:113811548) or (pvm:113811579) or (pvm:113812698)	pvm:113827912;pvm:113804690;pvm:113808128;pvm:113811548;pvm:113811579;pvm:113812698	rn00061	-1000	1000	0		6.2.1.3	Lipid metabolism	Y
R01281	Palmitoyl-CoA:L-serine C-palmitoyltransferase (decarboxylating)	C00154[c] + C00065[c] --> C02934[c] + C00010[c] + C00011[c]	(pvm:113820409) or (pvm:113820410)	pvm:113820409;pvm:113820410	rn00600	0	1000	0		2.3.1.50	Lipid metabolism	N
R01286	L-cystathionine L-homocysteine-lyase (deaminating; pyruvate-forming)	C02291[c] + C00001[c] --> C00155[c] + C00014[c] + C00022[c]	(pvm:113829381)	pvm:113829381	rn00270	0	1000	0		4.4.1.13	Amino acid metabolism	N
R01289	L-Serine hydro-lyase (adding homocysteine)	C00065[c] + C00155[c] --> C00542[c] + C00001[c]	(pvm:113818694)	pvm:113818694	rn00270	0	1000	0		4.2.1.22	Amino acid metabolism	N
R01290	L-serine hydro-lyase (adding homocysteine; L-cystathionine-forming)	C00065[c] + C00155[c] --> C02291[c] + C00001[c]	(pvm:113818694)	pvm:113818694	rn00270	0	1000	0		4.2.1.22	Amino acid metabolism	N
R01309	phosphatidylcholine acylhydrolase	C00157[c] + 2 C00001[c] + C00080[c] --> C00670[c] + 2 C00162[c]	(pvm:113802580) or (pvm:113803646) or (pvm:113803653) or (pvm:113803690)	pvm:113802580;pvm:113803646;pvm:113803653;pvm:113803690	rn00062	0	1000	0		3.1.1.5	Lipid metabolism	N
R01310	phosphatidylcholine phosphatidohydrolase	C00157[c] + C00001[c] + C00080[c] --> C00416[c] + C00114[c]	(pvm:113824601) or (pvm:113824614) or (pvm:113824615) or (pvm:113824616) or (pvm:113824636) or (pvm:113824661) or (pvm:113825750) or (pvm:113825759) or (pvm:113825768) or (pvm:113825776)	pvm:113824601;pvm:113824614;pvm:113824615;pvm:113824616;pvm:113824636;pvm:113824661;pvm:113825750;pvm:113825759;pvm:113825768;pvm:113825776	rn00564	0	1000	0		3.1.4.4	Lipid metabolism	N
R01313	Phosphatidylcholine 2-acylhydrolase	C00157[c] + C00001[c] --> C04230[c] + C00060[c]	(pvm:113800992) or (pvm:113800996) or (pvm:113801002) or (pvm:113801003) or (pvm:113801004) or (pvm:113801005) or (pvm:113801006)	pvm:113800992;pvm:113800996;pvm:113801002;pvm:113801003;pvm:113801004;pvm:113801005;pvm:113801006	rn00564	0	1000	0		3.1.1.4	Lipid metabolism	N
R01315	phosphatidylcholine 2-acylhydrolase	C00157[c] + C00001[c] + C00080[c] --> C04230[c] + C00162[c]	(pvm:113800992) or (pvm:113800996) or (pvm:113801002) or (pvm:113801003) or (pvm:113801004) or (pvm:113801005) or (pvm:113801006)	pvm:113800992;pvm:113800996;pvm:113801002;pvm:113801003;pvm:113801004;pvm:113801005;pvm:113801006	rn00564	0	1000	0		3.1.1.4	Lipid metabolism	N
R01318	Acyl-CoA:1-acyl-sn-glycero-3-phosphocholine O-acyltransferase	C00040[c] + C04230[c] --> C00010[c] + C00157[c] + C00080[c]	(pvm:113806206) or (pvm:113806207)	pvm:113806206;pvm:113806207	rn00564	0	1000	0		2.3.1.23	Lipid metabolism	N
R01321	CDP-choline:1,2-diacyl-sn-glycerol cholinephosphotransferase	C00307[c] + C00641[c] --> C00055[c] + C00157[c]	(pvm:113825401)	pvm:113825401	rn00564	0	1000	0		2.7.8.2	Lipid metabolism	N
R01324	citrate hydroxymutase	C00158[c] <=> C00311[c]	(pvm:113820999) or (pvm:113821011)	pvm:113820999;pvm:113821011	rn01100	-1000	1000	0		4.2.1.3	Global and overview maps	Y
R01325	citrate hydro-lyase (cis-aconitate-forming)	C00158[c] <=> C00417[c] + C00001[c]	(pvm:113820999) or (pvm:113821011)	pvm:113820999;pvm:113821011	rn00020	-1000	1000	0		4.2.1.3	Carbohydrate metabolism	Y
R01327	ITP:D-mannose 6-phosphotransferase	C00081[c] + C00159[c] --> C00104[c] + C00275[c]	(pvm:113813437) or (pvm:113813438)	pvm:113813437;pvm:113813438	rn00230	0	1000	0		2.7.1.1	Nucleotide metabolism	N
R01330	dATP:D-mannose 6-phosphotransferase	C00131[c] + C00159[c] --> C00206[c] + C00275[c]	(pvm:113813437) or (pvm:113813438)	pvm:113813437;pvm:113813438	rn00230	0	1000	0		2.7.1.1	Nucleotide metabolism	N
R01334	2-phosphoglycolate phosphohydrolase	C00988[c] + C00001[c] --> C00160[c] + C00009[c]	(pvm:113818834) or (pvm:113818834)	pvm:113818834;pvm:113818834	rn00630	0	1000	0		3.1.3.18	Carbohydrate metabolism	N
R01340	D-Amino-acid:oxygen oxidoreductase (deaminating)	C00405[c] + C00001[c] + C00007[c] --> C00161[c] + C00014[c] + C00027[c]	(pvm:113818896)	pvm:113818896	rn01100	0	1000	0		1.4.3.3	Global and overview maps	N
R01341	(S)-2-Hydroxy-acid:oxygen 2-oxidoreductase	C15565[c] + C00007[c] --> C00161[c] + C00027[c]	(pvm:113827607)	pvm:113827607	rn01100	0	1000	0		1.1.3.15	Global and overview maps	N
R01343	L-Ornithine:2-oxo-acid aminotransferase	C00077[c] + C00161[c] --> C01165[c] + C00151[c]	(pvm:113800343)	pvm:113800343	rn01100	0	1000	0		2.6.1.13	Global and overview maps	N
R01351	1-acylglycerol acylhydrolase	C01885[c] + C00001[c] --> C00116[c] + C00162[c]	(pvm:113800928) or (pvm:113800933)	pvm:113800928;pvm:113800933	rn00561	0	1000	0		3.1.1.23	Lipid metabolism	N
R01352	2-acylglycerol acylhydrolase	C02112[c] + C00001[c] --> C00116[c] + C00162[c]	(pvm:113800928) or (pvm:113800933)	pvm:113800928;pvm:113800933	rn01100	0	1000	0		3.1.1.23	Global and overview maps	N
R01357	Acetoacetate:CoA ligase (AMP-forming)	C00002[c] + C00164[c] + C00010[c] --> C00020[c] + C00013[c] + C00332[c]	(pvm:113814950)	pvm:113814950	rn00280	0	1000	0		6.2.1.16	Amino acid metabolism	N
R01360	(S)-3-hydroxy-3-methylglutaryl-CoA acetoacetate-lyase (acetyl-CoA-forming)	C00356[c] --> C00024[c] + C00164[c]	(pvm:113805763) or (pvm:113805768)	pvm:113805763;pvm:113805768	rn00072	0	1000	0		4.1.3.4	Lipid metabolism	N
R01361	(R)-3-Hydroxybutanoate:NAD+ oxidoreductase	C01089[c] + C00003[c] <=> C00164[c] + C00004[c] + C00080[c]	(pvm:113806382) or (pvm:113806416) or (pvm:113806416) or (pvm:113806416) or (pvm:113806421) or (pvm:113806422) or (pvm:113806440) or (pvm:113807583) or (pvm:113807583) or (pvm:113807601)	pvm:113806382;pvm:113806416;pvm:113806416;pvm:113806416;pvm:113806421;pvm:113806422;pvm:113806440;pvm:113807583;pvm:113807583;pvm:113807601	rn00072	-1000	1000	0		1.1.1.30	Lipid metabolism	Y
R01364	4-fumarylacetoacetate fumarylhydrolase	C00164[c] + C00122[c] --> C01061[c] + C00001[c]	(pvm:113799986)	pvm:113799986	rn00350	0	1000	0		3.7.1.2	Amino acid metabolism	N
R01368	Acyl-CoA:2-acylglycerol O-acyltransferase	C00040[c] + C02112[c] --> C00010[c] + C00165[c]	(pvm:113802825)	pvm:113802825	rn00062	0	1000	0		2.3.1.22	Lipid metabolism	N
R01372	Phenylpyruvate:oxygen oxidoreductase (hydroxylating,decarboxylating)	C00166[c] + C00007[c] --> C05852[c] + C00011[c]	(pvm:113809704)	pvm:113809704	rn00360	0	1000	0		1.13.11.27	Amino acid metabolism	N
R01375	L-Glutamine:phenylpyruvate aminotransferase	C00064[c] + C00166[c] --> C00940[c] + C00079[c]	(pvm:113812323)	pvm:113812323	rn00220	0	1000	0		2.6.1.64	Amino acid metabolism	N
R01378	Phenylpyruvate keto-enol-isomerase	C00166[c] <=> C02763[c]	(pvm:113814324) or (pvm:113814324)	pvm:113814324;pvm:113814324	rn00360	-1000	1000	0		5.3.2.1	Amino acid metabolism	Y
R01383	UDPglucuronate beta-D-glucuronosyltransferase (acceptor-unspecific)	C00167[c] + C01335[c] <=> C00015[c] + C03033[c]	(pvm:113823738) or (pvm:113823745) or (pvm:113823747) or (pvm:113823748) or (pvm:113823750) or (pvm:113823750) or (pvm:113823785) or (pvm:113823789) or (pvm:113823789) or (pvm:113823792) or (pvm:113823795)	pvm:113823738;pvm:113823745;pvm:113823747;pvm:113823748;pvm:113823750;pvm:113823750;pvm:113823785;pvm:113823789;pvm:113823789;pvm:113823792;pvm:113823795	rn00040	-1000	1000	0		2.4.1.17	Carbohydrate metabolism	Y
R01384	UDP-D-glucuronate carboxy-lyase (UDP-D-xylose-forming)	C00167[c] --> C00190[c] + C00011[c]	(pvm:113814087)	pvm:113814087	rn00520	0	1000	0		4.1.1.35	Carbohydrate metabolism	N
R01394	hydroxypyruvate aldose-ketose-isomerase	C00168[c] --> C01146[c]	(pvm:113826082)	pvm:113826082	rn00630	0	1000	0		5.3.1.22	Carbohydrate metabolism	N
R01397	carbamoyl-phosphate:L-aspartate carbamoyltransferase	C00169[c] + C00049[c] --> C00009[c] + C00438[c]	(pvm:113821736)	pvm:113821736	rn00240	0	1000	0		2.1.3.2	Nucleotide metabolism	N
R01402	S-methyl-5'-thioadenosine:phosphate S-methyl-5-thio-alpha-D-ribosyl-transferase	C00170[c] + C00009[c] --> C00147[c] + C04188[c]	(pvm:113812398) or (pvm:113812417)	pvm:113812398;pvm:113812417	rn00270	0	1000	0		2.4.2.28	Amino acid metabolism	N
R01415	5,6-Dihydrothymine:NADP+ oxidoreductase	C21028[c] + C00006[c] <=> C00178[c] + C00005[c] + C00080[c]	(pvm:113817899)	pvm:113817899	rn00240	-1000	1000	0		1.3.1.2	Nucleotide metabolism	Y
R01421	Benzoyl phosphate phosphohydrolase	C06206[c] + C00001[c] --> C00180[c] + C00009[c]	(pvm:113803315)	pvm:113803315	rn00627	0	1000	0		3.6.1.7	Xenobiotics biodegradation and metabolism	N
R01430	D-xylose:NADP+ 1-oxidoreductase	C00181[c] + C00006[c] --> C02266[c] + C00005[c] + C00080[c]	(pvm:113821709) or (pvm:113826363)	pvm:113821709;pvm:113826363	rn00040	0	1000	0		1.1.1.179	Carbohydrate metabolism	N
R01432	D-xylose aldose-ketose-isomerase	C00181[c] <=> C00310[c]	(pvm:113800179) or (pvm:113800184) or (pvm:113806240) or (pvm:113807483) or (pvm:113810916)	pvm:113800179;pvm:113800184;pvm:113806240;pvm:113807483;pvm:113810916	rn00040	-1000	1000	0		5.3.1.5	Carbohydrate metabolism	Y
R01451	Cholesterol:NAD+ delta7-oxidoreductase	C00187[c] + C00003[c] --> C01164[c] + C00004[c] + C00080[c]	(pvm:113817922)	pvm:113817922	rn00100	0	1000	0		1.3.1.21	Lipid metabolism	N
R01456	cholesterol:NADP+ delta7-oxidoreductase	C00187[c] + C00006[c] --> C01164[c] + C00005[c] + C00080[c]	(pvm:113817922)	pvm:113817922	rn00100	0	1000	0		1.3.1.21	Lipid metabolism	N
R01457	cholesterol:NADP+ Delta24-oxidoreductase	C00187[c] + C00006[c] <=> C01802[c] + C00080[c] + C00005[c]	(pvm:113820205) or (pvm:113820218)	pvm:113820205;pvm:113820218	rn00100	-1000	1000	0		1.3.1.72	Lipid metabolism	Y
R01461	Acyl-CoA:cholesterol O-acyltransferase	C00040[c] + C00187[c] <=> C00010[c] + C02530[c]	(pvm:113809781)	pvm:113809781	rn00100	-1000	1000	0		2.3.1.26	Lipid metabolism	Y
R01462	cholesterol ester acylhydrolase	C02530[c] + C00001[c] --> C00187[c] + C00162[c]	(pvm:113827769) or (pvm:113827780) or (pvm:113828831) or (pvm:113828849) or (pvm:113828857) or (pvm:113828872)	pvm:113827769;pvm:113827780;pvm:113828831;pvm:113828849;pvm:113828857;pvm:113828872	rn00100	0	1000	0		3.1.1.13	Lipid metabolism	N
R01465	L-threonine:NAD+ oxidoreductase	C00188[c] + C00003[c] --> C03508[c] + C00004[c] + C00080[c]	(pvm:113809495)	pvm:113809495	rn00260	0	1000	0		1.1.1.103	Amino acid metabolism	N
R01468	ATP:ethanolamine O-phosphotransferase	C00002[c] + C00189[c] --> C00008[c] + C00346[c]	(pvm:113807145) or (pvm:113807146)	pvm:113807145;pvm:113807146	rn00564	0	1000	0		2.7.1.82	Lipid metabolism	N
R01476	ATP:D-glucuronate 1-phosphotransferase	C00002[c] + C00191[c] <=> C00008[c] + C05385[c]	(pvm:113803728)	pvm:113803728	rn00040	-1000	1000	0		2.7.1.43	Carbohydrate metabolism	Y
R01492	ATP:cob(I)alamin Co-beta-adenosyltransferase	C00002[c] + C00853[c] --> C00536[c] + C00194[c]	(pvm:113825319)	pvm:113825319	rn00860	0	1000	0		2.5.1.17	Metabolism of cofactors and vitamins	N
R01493	N-Acylsphingosine amidohydrolase	C00195[c] + C00001[c] --> C00060[c] + C00319[c] + C00080[c]	(pvm:113822940) or (pvm:113822940) or (pvm:113824066) or (pvm:113825207)	pvm:113822940;pvm:113822940;pvm:113824066;pvm:113825207	rn00600	0	1000	0		3.5.1.23	Lipid metabolism	N
R01494	N-Acylsphingosine amidohydrolase	C00195[c] + C00001[c] --> C00162[c] + C00319[c]	(pvm:113822940) or (pvm:113822940) or (pvm:113824066) or (pvm:113825207)	pvm:113822940;pvm:113822940;pvm:113824066;pvm:113825207	rn00600	0	1000	0		3.5.1.23	Lipid metabolism	N
R01497	UDP-glucose:N-acylsphingosine D-glucosyltransferase	C00029[c] + C00195[c] --> C00015[c] + C01190[c]	(pvm:113807827)	pvm:113807827	rn00600	0	1000	0		2.4.1.80	Lipid metabolism	N
R01500	UDP-alpha-D-galactose:N-acylsphingosine D-galactosyltransferase	C00052[c] + C00195[c] --> C00015[c] + C02686[c]	(pvm:113828240)	pvm:113828240	rn00600	0	1000	0		2.4.1.47	Lipid metabolism	N
R01512	ATP:3-phospho-D-glycerate 1-phosphotransferase	C00002[c] + C00197[c] <=> C00008[c] + C00236[c]	(pvm:113818725)	pvm:113818725	rn00010	-1000	1000	0		2.7.2.3	Carbohydrate metabolism	Y
R01513	3-Phospho-D-glycerate:NAD+ 2-oxidoreductase	C00197[c] + C00003[c] <=> C03232[c] + C00004[c] + C00080[c]	(pvm:113827588)	pvm:113827588	rn00260	-1000	1000	0		1.1.1.95	Amino acid metabolism	Y
R01515	3-Phospho-D-glyceroyl phosphate phosphohydrolase	C00236[c] + C00001[c] --> C00197[c] + C00009[c]	(pvm:113803315)	pvm:113803315	rn00010	0	1000	0		3.6.1.7	Carbohydrate metabolism	N
R01516	2,3-bisphospho-D-glycerate 2-phosphohydrolase	C01159[c] + C00615[c] <=> C00197[c] + C04262[c]	(pvm:113821656) or (pvm:113826315)	pvm:113821656;pvm:113826315	rn00010	-1000	1000	0		5.4.2.11	Carbohydrate metabolism	Y
R01519	D-Glucono-1,5-lactone lactonohydrolase	C00198[c] + C00001[c] --> C00257[c]	(pvm:113828884) or (pvm:113828906) or (pvm:113830003) or (pvm:113830010) or (pvm:113830013) or (pvm:113830017) or (pvm:113830026)	pvm:113828884;pvm:113828906;pvm:113830003;pvm:113830010;pvm:113830013;pvm:113830017;pvm:113830026	rn00030	0	1000	0		3.1.1.17	Carbohydrate metabolism	N
R01529	D-Ribulose-5-phosphate 3-epimerase	C00199[c] <=> C00231[c]	(pvm:113816330)	pvm:113816330	rn00030	-1000	1000	0		5.1.3.1	Carbohydrate metabolism	Y
R01532	nucleoside-triphosphate diphosphohydrolase	C00201[c] + C00001[c] --> C00215[c] + C00013[c]	(pvm:113813587) or (pvm:113814754) or (pvm:113819647) or (pvm:113819647)	pvm:113813587;pvm:113814754;pvm:113819647;pvm:113819647	rn01100	0	1000	0		3.6.1.9	Global and overview maps	N
R01548	dATP:cytidine 5'-phosphotransferase	C00131[c] + C00475[c] --> C00206[c] + C00055[c]	(pvm:113803732) or (pvm:113803763)	pvm:113803732;pvm:113803763	rn00240	0	1000	0		2.7.1.48	Nucleotide metabolism	N
R01549	dATP:uridine 5'-phosphotransferase	C00131[c] + C00299[c] --> C00206[c] + C00105[c]	(pvm:113803732) or (pvm:113803763)	pvm:113803732;pvm:113803763	rn00240	0	1000	0		2.7.1.48	Nucleotide metabolism	N
R01560	Adenosine aminohydrolase	C00212[c] + C00001[c] --> C00294[c] + C00014[c]	(pvm:113824077) or (pvm:113826424) or (pvm:113826425)	pvm:113824077;pvm:113826424;pvm:113826425	rn00230	0	1000	0		3.5.4.4	Nucleotide metabolism	N
R01561	adenosine:phosphate alpha-D-ribosyltransferase	C00212[c] + C00009[c] <=> C00147[c] + C00620[c]	(pvm:113810046)	pvm:113810046	rn00230	-1000	1000	0		2.4.2.1	Nucleotide metabolism	Y
R01565	N,N-dimethylglycine,5,6,7,8-tetrahydrofolate:electron-transferflavoprotein oxidoreductase (demethylating,5,10-methylenetetrahydrofolate-forming)	C01026[c] + C00101[c] + C04253[c] --> C00213[c] + C00143[c] + C04570[c]	(pvm:113829292)	pvm:113829292	rn00260	0	1000	0		1.5.8.4	Amino acid metabolism	N
R01567	ATP:thymidine 5'-phosphotransferase	C00002[c] + C00214[c] --> C00008[c] + C00364[c]	(pvm:113799947)	pvm:113799947	rn00240	0	1000	0		2.7.1.21	Nucleotide metabolism	N
R01590	Arachidonate:oxygen oxidoreductase	C00219[c] + 2 C00007[c] --> C05956[c]	(pvm:113814348)	pvm:113814348	rn00590	0	1000	0		1.14.99.1	Lipid metabolism	N
R01595	Arachidonate:oxygen 5-oxidoreductase	C00219[c] + C00007[c] --> C05356[c]	(pvm:113809704)	pvm:113809704	rn00590	0	1000	0		1.13.11.34	Lipid metabolism	N
R01599	Arachidonate,reduced acceptor:oxygen oxidoreductase	C00219[c] + C00030[c] + 2 C00007[c] --> C00427[c] + C00028[c] + C00001[c]	(pvm:113814348)	pvm:113814348	rn00590	0	1000	0		1.14.99.1	Lipid metabolism	N
R01602	D-glucose 1-epimerase	C00267[c] <=> C00221[c]	(pvm:113819971)	pvm:113819971	rn00010	-1000	1000	0		5.1.3.3	Carbohydrate metabolism	Y
R01616	4-Coumarate:CoA ligase (AMP-forming)	C00002[c] + C00811[c] + C00010[c] --> C00020[c] + C00013[c] + C00223[c]	(pvm:113816148) or (pvm:113823190) or (pvm:113824334) or (pvm:113830072) or (pvm:113830090) or (pvm:113803418) or (pvm:113804620) or (pvm:113804621) or (pvm:113808051) or (pvm:113808051) or (pvm:113814950)	pvm:113816148;pvm:113823190;pvm:113824334;pvm:113830072;pvm:113830090;pvm:113803418;pvm:113804620;pvm:113804621;pvm:113808051;pvm:113808051;pvm:113814950	rn00130	0	1000	0		6.2.1.12	Metabolism of cofactors and vitamins	N
R01639	ATP:D-xylulose 5-phosphotransferase	C00002[c] + C00310[c] <=> C00008[c] + C00231[c]	(pvm:113800913)	pvm:113800913	rn00040	-1000	1000	0		2.7.1.17	Carbohydrate metabolism	Y
R01641	sedoheptulose-7-phosphate:D-glyceraldehyde-3-phosphate glycolaldehyde transferase	C05382[c] + C00118[c] <=> C00117[c] + C00231[c]	(pvm:113822883)	pvm:113822883	rn00030	-1000	1000	0		2.2.1.1	Carbohydrate metabolism	Y
R01648	4-aminobutanoate:2-oxoglutarate aminotransferase	C00334[c] + C00026[c] <=> C00232[c] + C00025[c]	(pvm:113801943) or (pvm:113801950)	pvm:113801943;pvm:113801950	rn00250	-1000	1000	0		2.6.1.19	Amino acid metabolism	Y
R01655	5,10-Methenyltetrahydrofolate 5-hydrolase (decyclizing)	C00445[c] + C00001[c] <=> C00234[c] + C00080[c]	(pvm:113827619) or (pvm:113828758) or (pvm:113802181)	pvm:113827619;pvm:113828758;pvm:113802181	rn00670	-1000	1000	0		3.5.4.9	Metabolism of cofactors and vitamins	Y
R01658	Dimethylallyl-diphosphate:isopentenyl-diphosphate dimethylallyltranstransferase	C00235[c] + C00129[c] --> C00013[c] + C00341[c]	(pvm:113820765) or (pvm:113821841) or (pvm:113821845)	pvm:113820765;pvm:113821841;pvm:113821845	rn00900	0	1000	0		2.5.1.1	Metabolism of terpenoids and polyketides	N
R01663	dCMP aminohydrolase	C00239[c] + C00001[c] --> C00365[c] + C00014[c]	(pvm:113811195) or (pvm:113814628)	pvm:113811195;pvm:113814628	rn00240	0	1000	0		3.5.4.12	Nucleotide metabolism	N
R01667	dCDP nucleotidohydrolase	C00705[c] + C00001[c] --> C00239[c] + C00009[c]	(pvm:113806629)	pvm:113806629	rn00240	0	1000	0		3.6.1.12	Nucleotide metabolism	N
R01676	Guanine aminohydrolase	C00242[c] + C00001[c] --> C00385[c] + C00014[c]	(pvm:113818288) or (pvm:113818292) or (pvm:113818296) or (pvm:113819468)	pvm:113818288;pvm:113818292;pvm:113818296;pvm:113819468	rn00230	0	1000	0		3.5.4.3	Nucleotide metabolism	N
R01687	(5-L-glutamyl)-peptide:taurine 5-glutamyltransferase	C03193[c] + C00245[c] --> C00012[c] + C05844[c]	(pvm:113801114) or (pvm:113801149)	pvm:113801114;pvm:113801149	rn00430	0	1000	0		2.3.2.2	Metabolism of other amino acids	N
R01698	Dihydrolipoamide:NAD+ oxidoreductase	C00579[c] + C00003[c] --> C00248[c] + C00004[c] + C00080[c]	(pvm:113829387) or (pvm:113829410)	pvm:113829387;pvm:113829410	rn01100	0	1000	0		1.8.1.4	Global and overview maps	N
R01699	pyruvate:[dihydrolipoyllysine-residue acetyltransferase]-lipoyllysine 2-oxidoreductase (decarboxylating, acceptor-acetylating)	C00022[c] + C15972[c] --> C16255[c] + C00011[c]	(pvm:113817772) or (pvm:113817781) or (pvm:113815366)	pvm:113817772;pvm:113817781;pvm:113815366	rn00010	0	1000	0		1.2.4.1	Carbohydrate metabolism	N
R01700	2-oxoglutarate:[dihydrolipoyllysine-residue succinyltransferase]-lipoyllysine 2-oxidoreductase (decarboxylating, acceptor-succinylating)	C00026[c] + C15972[c] --> C16254[c] + C00011[c]	(pvm:113815367) or (pvm:113815379)	pvm:113815367;pvm:113815379	rn01100	0	1000	0		1.2.4.2	Global and overview maps	N
R01701	3-methyl-2-oxobutanoate:[dihydrolipoyllysine-residue (2-methylpropanoyl)transferase] lipoyllysine 2-oxidoreductase (decarboxylating, acceptor-2-methylpropanoylating)	C00141[c] + C15972[c] <=> C15977[c] + C00011[c]	(pvm:113815389) or (pvm:113816682)	pvm:113815389;pvm:113816682	rn01100	-1000	1000	0		1.2.4.4	Global and overview maps	Y
R01702	4-methyl-2-oxopentanoate:[dihydrolipoyllysine-residue (2-methylpropanoyl)transferase] lipoyllysine 2-oxidoreductase (decarboxylating, acceptor-2-methylpropanoylating)	C00233[c] + C15972[c] <=> C15975[c] + C00011[c]	(pvm:113815389) or (pvm:113816682)	pvm:113815389;pvm:113816682	rn01100	-1000	1000	0		1.2.4.4	Global and overview maps	Y
R01705	Palmitoyl-protein hydrolase	C00249[c] + C00017[c] --> C06412[c] + C00001[c]	(pvm:113800811) or (pvm:113800811) or (pvm:113800812)	pvm:113800811;pvm:113800811;pvm:113800812	rn00061	0	1000	0		3.1.2.22	Lipid metabolism	N
R01710	pyridoxamine:oxygen oxidoreductase (deaminating)	C00534[c] + C00001[c] + C00007[c] <=> C00250[c] + C00014[c] + C00027[c]	(pvm:113818926)	pvm:113818926	rn00750	-1000	1000	0		1.4.3.5	Metabolism of cofactors and vitamins	Y
R01724	5-phospho-alpha-D-ribose 1-diphosphate:nicotinate ligase (ADP, diphosphate-forming)	C01185[c] + C00013[c] + C00008[c] + C00009[c] <=> C00253[c] + C00119[c] + C00002[c] + C00001[c] + C00080[c]	(pvm:113806063)	pvm:113806063	rn00760	-1000	1000	0		6.3.4.21	Metabolism of cofactors and vitamins	Y
R01736	(R)-S-Lactoylglutathione hydrolase	C03451[c] + C00001[c] --> C00051[c] + C00256[c]	(pvm:113800847)	pvm:113800847	rn00620	0	1000	0		3.1.2.6	Carbohydrate metabolism	N
R01752	D-Glyceraldehyde:NAD+ oxidoreductase	C00577[c] + C00003[c] + C00001[c] <=> C00258[c] + C00004[c] + C00080[c]	(pvm:113825010) or (pvm:113825013) or (pvm:113826103) or (pvm:113826145) or (pvm:113826151) or (pvm:113826159) or (pvm:113826162) or (pvm:113816548)	pvm:113825010;pvm:113825013;pvm:113826103;pvm:113826145;pvm:113826151;pvm:113826159;pvm:113826162;pvm:113816548	rn00561	-1000	1000	0		1.2.1.3	Lipid metabolism	Y
R01768	hypoxanthine:NAD+ oxidoreductase	C00262[c] + C00003[c] + C00001[c] --> C00385[c] + C00004[c] + C00080[c]	(pvm:113818032) or (pvm:113818059) or (pvm:113819175) or (pvm:113819187) or (pvm:113819198) or (pvm:113819205) or (pvm:113819214) or (pvm:113819217)	pvm:113818032;pvm:113818059;pvm:113819175;pvm:113819187;pvm:113819198;pvm:113819205;pvm:113819214;pvm:113819217	rn00230	0	1000	0		1.17.1.4	Nucleotide metabolism	N
R01769	Hypoxanthine:oxygen oxidoreductase	C00262[c] + C00007[c] + C00001[c] --> C00385[c] + C00027[c]	(pvm:113819219) or (pvm:113820335) or (pvm:113820343) or (pvm:113820345) or (pvm:113820345) or (pvm:113820385) or (pvm:113820388) or (pvm:113821490)	pvm:113819219;pvm:113820335;pvm:113820343;pvm:113820345;pvm:113820345;pvm:113820385;pvm:113820388;pvm:113821490	rn00230	0	1000	0		1.17.3.2	Nucleotide metabolism	N
R01780	Succinyl-CoA:3-oxo-acid CoA-transferase	C00091[c] + C01656[c] --> C00042[c] + C00264[c]	(pvm:113826605)	pvm:113826605	rn00020	0	1000	0		2.8.3.5	Carbohydrate metabolism	N
R01788	alpha-D-Glucose 6-phosphate phosphohydrolase	C00668[c] + C00001[c] <=> C00267[c] + C00009[c]	(pvm:113818702) or (pvm:113819863)	pvm:113818702;pvm:113819863	rn00052	-1000	1000	0		3.1.3.9	Carbohydrate metabolism	Y
R01790	1,4-alpha-D-Glucan glucohydrolase	C00369[c] + C00001[c] --> C00267[c] + C00369[c]	(pvm:113823203)	pvm:113823203	rn00500	0	1000	0		3.2.1.3	Carbohydrate metabolism	N
R01793	5,6,7,8-tetrahydrobiopterin:NAD+ oxidoreductase	C00268[c] + C00004[c] + C00080[c] <=> C00272[c] + C00003[c]	(pvm:113821236)	pvm:113821236	rn00790	-1000	1000	0		1.5.1.34	Metabolism of cofactors and vitamins	Y
R01794	5,6,7,8-tetrahydrobiopterin:NADP+ oxidoreductase	C00268[c] + C00005[c] + C00080[c] <=> C00272[c] + C00006[c]	(pvm:113821236)	pvm:113821236	rn00790	-1000	1000	0		1.5.1.34	Metabolism of cofactors and vitamins	Y
R01795	L-Phenylalanine,tetrahydrobiopterin:oxygen oxidoreductase (4-hydroxylating)	C00272[c] + C00079[c] + C00007[c] --> C00268[c] + C00082[c] + C00001[c]	(pvm:113813041)	pvm:113813041	rn00360	0	1000	0		1.14.16.1	Amino acid metabolism	N
R01799	CTP:phosphatidate cytidyltransferase	C00063[c] + C00416[c] --> C00013[c] + C00269[c]	(pvm:113829113)	pvm:113829113	rn00564	0	1000	0		2.7.7.41	Lipid metabolism	N
R01801	CDP-diacylglycerol:sn-glycerol-3-phosphate 3-phosphatidyltransferase	C00269[c] + C00093[c] --> C00055[c] + C03892[c]	(pvm:113819835)	pvm:113819835	rn00564	0	1000	0		2.7.8.5	Lipid metabolism	N
R01802	CDP-diacylglycerol:myo-inositol 3-phosphatidyltransferase	C00269[c] + C00137[c] --> C00055[c] + C01194[c]	(pvm:113824285)	pvm:113824285	rn00562	0	1000	0		2.7.8.11	Carbohydrate metabolism	N
R01804	phosphoenolpyruvate:N-acetyl-D-mannosamine C-(1-carboxyvinyl)transferase (phosphate-hydrolysing, 2-carboxy-2-oxoethyl-forming)	C00270[c] + C00009[c] --> C00645[c] + C00074[c] + C00001[c]	(pvm:113802077)	pvm:113802077	rn00520	0	1000	0		2.5.1.56	Carbohydrate metabolism	N
R01805	N-Acetylneuraminate 9-phosphate phosphohydrolase	C06241[c] + C00001[c] --> C00270[c] + C00009[c]	(pvm:113820054)	pvm:113820054	rn00520	0	1000	0		3.1.3.29	Carbohydrate metabolism	N
R01807	Acetyl-CoA:N-acetylneuraminate 7-O-acetyltransferase	C00024[c] + C00270[c] --> C00010[c] + C04016[c]	(pvm:113817000)	pvm:113817000	rn00010	0	1000	0		2.3.1.45	Carbohydrate metabolism	N
R01808	Acetyl-CoA:N-acetylneuraminate 9-O-acetyltransferase	C00024[c] + C00270[c] --> C00010[c] + C04017[c]	(pvm:113817000)	pvm:113817000	rn00010	0	1000	0		2.3.1.45	Carbohydrate metabolism	N
R01811	N-Acetylneuraminate pyruvate-lyase (N-acetyl-D-mannosamine-forming)	C00270[c] --> C00645[c] + C00022[c]	(pvm:113805744) or (pvm:113805746)	pvm:113805744;pvm:113805746	rn00520	0	1000	0		4.1.3.3	Carbohydrate metabolism	N
R01812	5,6,7,8-Tetrahydrobiopterin:NADP+ oxidoreductase	C00272[c] + 2 C00006[c] --> C06313[c] + 2 C00005[c] + 2 C00080[c]	(pvm:113821225) or (pvm:113821223)	pvm:113821225;pvm:113821223	rn00480	0	1000	0		1.5.1.33	Metabolism of other amino acids	N
R01813	tetrahydrobiopterin:NADP+ oxidoreductase	C00272[c] + C00006[c] --> C04244[c] + C00005[c] + C00080[c]	(pvm:113811172)	pvm:113811172	rn00790	0	1000	0		1.1.1.153	Metabolism of cofactors and vitamins	N
R01814	L-Tryptophan,tetrahydrobiopterin:oxygen oxidoreductase (5-hydroxylating)	C00272[c] + C00078[c] + C00007[c] --> C00643[c] + C00268[c] + C00001[c]	(pvm:113813054)	pvm:113813054	rn00380	0	1000	0		1.14.16.4	Amino acid metabolism	N
R01815	L-Tyrosine,tetrahydrobiopterin:oxygen oxidoreductase (3-hydroxylating)	C00272[c] + C00082[c] + C00007[c] --> C00355[c] + C00268[c] + C00001[c]	(pvm:113813041)	pvm:113813041	rn00350	0	1000	0		1.14.16.2	Amino acid metabolism	N
R01829	sedoheptulose 1,7-bisphosphate D-glyceraldehyde-3-phosphate-lyase	C00447[c] --> C00111[c] + C00279[c]	(pvm:113820161) or (pvm:113821322)	pvm:113820161;pvm:113821322	rn00710	0	1000	0		4.1.2.13	Energy metabolism	N
R01830	beta-D-Fructose 6-phosphate:D-glyceraldehyde-3-phosphate glycolaldehyde transferase	C05345[c] + C00118[c] <=> C00279[c] + C00231[c]	(pvm:113822883)	pvm:113822883	rn00030	-1000	1000	0		2.2.1.1	Carbohydrate metabolism	Y
R01842	androstenedione,NADPH---hemoprotein reductase:oxygen oxidoreductase (7alpha-hydroxylating)	C00280[c] + C03024[c] + C00007[c] --> C05296[c] + C03161[c] + C00001[c]	(pvm:113829697) or (pvm:113801218) or (pvm:113802729) or (pvm:113802766) or (pvm:113803893) or (pvm:113803906) or (pvm:113803903) or (pvm:113803928) or (pvm:113805029) or (pvm:113805029) or (pvm:113805053)	pvm:113829697;pvm:113801218;pvm:113802729;pvm:113802766;pvm:113803893;pvm:113803906;pvm:113803903;pvm:113803928;pvm:113805029;pvm:113805029;pvm:113805053	rn00140	0	1000	0		1.14.14.1	Lipid metabolism	N
R01843	ATP:Sedoheptulose 7-phosphate 1-phosphotransferase	C00002[c] + C05382[c] --> C00008[c] + C00447[c]	(pvm:113815914) or (pvm:113815919)	pvm:113815914;pvm:113815919	rn00230	0	1000	0		2.7.1.11	Nucleotide metabolism	N
R01844	ATP:sedoheptulose 7-phosphate	C00002[c] + C02076[c] <=> C00008[c] + C05382[c]	(pvm:113817189)	pvm:113817189	rn00710	-1000	1000	0		2.7.1.14	Energy metabolism	Y
R01851	Methanethiol:oxygen oxidoreductase	C00409[c] + C00007[c] + C00001[c] --> C00283[c] + C00067[c] + C00027[c]	(pvm:113800367) or (pvm:113800367)	pvm:113800367;pvm:113800367	rn00920	0	1000	0		1.8.3.4	Energy metabolism	N
R01857	ATP:dGDP phosphotransferase	C00002[c] + C00361[c] <=> C00008[c] + C00286[c]	(pvm:113821087) or (pvm:113821105) or (pvm:113821107)	pvm:113821087;pvm:113821105;pvm:113821107	rn00230	-1000	1000	0		2.7.4.6	Nucleotide metabolism	Y
R01858	dGTP:pyruvate 2-O-phosphotransferase	C00286[c] + C00022[c] --> C00361[c] + C00074[c]	(pvm:113802658) or (pvm:113802660)	pvm:113802658;pvm:113802660	rn00230	0	1000	0		2.7.1.40	Nucleotide metabolism	N
R01859	propanoyl-CoA:carbon-dioxide ligase (ADP-forming)	C00002[c] + C00100[c] + C00288[c] + C00080[c] --> C00008[c] + C00009[c] + C00683[c]	(pvm:113804087) or (pvm:113808626) or (pvm:113818123)	pvm:113804087;pvm:113808626;pvm:113818123	rn00720	0	1000	0		6.4.1.3	Energy metabolism	N
R01868	(S)-dihydroorotate:quinone oxidoreductase	C00337[c] + C15602[c] <=> C00295[c] + C15603[c]	(pvm:113825995) or (pvm:113826004)	pvm:113825995;pvm:113826004	rn00240	-1000	1000	0		1.3.5.2	Nucleotide metabolism	Y
R01870	Orotidine-5'-phosphate:diphosphate phospho-alpha-D-ribosyl-transferase	C01103[c] + C00013[c] <=> C00295[c] + C00119[c]	(pvm:113811244)	pvm:113811244	rn00240	-1000	1000	0		2.4.2.10	Nucleotide metabolism	Y
R01878	Cytidine aminohydrolase	C00475[c] + C00001[c] --> C00299[c] + C00014[c]	(pvm:113827551)	pvm:113827551	rn00240	0	1000	0		3.5.4.5	Nucleotide metabolism	N
R01880	dGTP:uridine 5'-phosphotransferase	C00286[c] + C00299[c] --> C00361[c] + C00105[c]	(pvm:113803732) or (pvm:113803763)	pvm:113803732;pvm:113803763	rn00240	0	1000	0		2.7.1.48	Nucleotide metabolism	N
R01890	CTP:choline-phosphate cytidylyltransferase	C00063[c] + C00588[c] --> C00013[c] + C00307[c] + C00080[c]	(pvm:113826837)	pvm:113826837	rn00564	0	1000	0		2.7.7.15	Lipid metabolism	N
R01899	Isocitrate:NADP+ oxidoreductase	C00311[c] + C00006[c] <=> C05379[c] + C00005[c] + C00080[c]	(pvm:113820687) or (pvm:113820688)	pvm:113820687;pvm:113820688	rn00020	-1000	1000	0		1.1.1.42	Carbohydrate metabolism	Y
R01900	isocitrate hydro-lyase (cis-aconitate-forming)	C00311[c] <=> C00417[c] + C00001[c]	(pvm:113820999) or (pvm:113821011)	pvm:113820999;pvm:113821011	rn00020	-1000	1000	0		4.2.1.3	Carbohydrate metabolism	Y
R01904	Xylitol:NADP+ 4-oxidoreductase (L-xylulose-forming)	C00379[c] + C00006[c] <=> C00312[c] + C00005[c] + C00080[c]	(pvm:113820466)	pvm:113820466	rn00040	-1000	1000	0		1.1.1.10	Carbohydrate metabolism	Y
R01909	ATP:pyridoxine 5'-phosphotransferase	C00002[c] + C00314[c] --> C00008[c] + C00627[c]	(pvm:113802620) or (pvm:113802630)	pvm:113802620;pvm:113802630	rn00750	0	1000	0		2.7.1.35	Metabolism of cofactors and vitamins	N
R01911	pyridoxine-5'-phosphate phosphohydrolase	C00314[c] + C00009[c] --> C00627[c] + C00001[c]	(pvm:113817572)	pvm:113817572	rn00750	0	1000	0		3.1.3.74	Metabolism of cofactors and vitamins	N
R01920	S-adenosylmethioninamine:putrescine 3-aminopropyltransferase	C01137[c] + C00134[c] --> C00170[c] + C00315[c] + C00080[c]	(pvm:113824173)	pvm:113824173	rn00330	0	1000	0		2.5.1.16	Amino acid metabolism	N
R01923	palmitoyl-CoA:L-carnitine O-palmitoyltransferase	C00154[c] + C00318[c] <=> C00010[c] + C02990[c]	(pvm:113802801) or (pvm:113802806) or (pvm:113802808) or (pvm:113802814)	pvm:113802801;pvm:113802806;pvm:113802808;pvm:113802814	rn00071	-1000	1000	0		2.3.1.21	Lipid metabolism	Y
R01926	ATP:sphingosine 1-phosphotransferase;	C00319[c] + C00002[c] --> C06124[c] + C00008[c]	(pvm:113808336)	pvm:113808336	rn00600	0	1000	0		2.7.1.91	Lipid metabolism	N
R01939	L-2-aminoadipate:2-oxoglutarate aminotransferase	C00956[c] + C00026[c] <=> C00322[c] + C00025[c]	(pvm:113804151) or (pvm:113804173) or (pvm:113806546) or (pvm:113806546) or (pvm:113806580) or (pvm:113808841) or (pvm:113808840) or (pvm:113809927)	pvm:113804151;pvm:113804173;pvm:113806546;pvm:113806546;pvm:113806580;pvm:113808841;pvm:113808840;pvm:113809927	rn00300	-1000	1000	0		2.6.1.39	Amino acid metabolism	Y
R01943	Caffeate:CoA ligase (AMP-forming);	C00002[c] + C01197[c] + C00010[c] --> C00020[c] + C00013[c] + C00323[c]	(pvm:113816148) or (pvm:113823190) or (pvm:113824334) or (pvm:113830072) or (pvm:113830090) or (pvm:113803418) or (pvm:113804620) or (pvm:113804621) or (pvm:113808051) or (pvm:113808051) or (pvm:113814950)	pvm:113816148;pvm:113823190;pvm:113824334;pvm:113830072;pvm:113830090;pvm:113803418;pvm:113804620;pvm:113804621;pvm:113808051;pvm:113808051;pvm:113814950	rn00940	0	1000	0		6.2.1.12	Biosynthesis of other secondary metabolites	N
R01951	GTP:beta-L-fucose-1-phosphate guanylyltransferase	C00044[c] + C02985[c] <=> C00013[c] + C00325[c]	(pvm:113828048)	pvm:113828048	rn00051	-1000	1000	0		2.7.7.30	Carbohydrate metabolism	Y
R01954	L-Citrulline:L-aspartate ligase (AMP-forming)	C00002[c] + C00327[c] + C00049[c] --> C00020[c] + C00013[c] + C03406[c]	(pvm:113801201)	pvm:113801201	rn00220	0	1000	0		6.3.4.5	Amino acid metabolism	N
R01956	L-Kynurenine:2-oxoglutarate aminotransferase	C00328[c] + C00026[c] --> C01252[c] + C00025[c]	(pvm:113812331) or (pvm:113812334) or (pvm:113813400) or (pvm:113813400) or (pvm:113813421) or (pvm:113813424) or (pvm:113813427) or (pvm:113813430) or (pvm:113813433)	pvm:113812331;pvm:113812334;pvm:113813400;pvm:113813400;pvm:113813421;pvm:113813424;pvm:113813427;pvm:113813430;pvm:113813433	rn00380	0	1000	0		2.6.1.7	Amino acid metabolism	N
R01960	L-Kynurenine,NADPH:oxygen oxidoreductase (3-hydroxylating)	C00328[c] + C00007[c] + C00005[c] + C00080[c] --> C03227[c] + C00006[c] + C00001[c]	(pvm:113828622)	pvm:113828622	rn00380	0	1000	0		1.14.13.9	Amino acid metabolism	N
R01963	N-Sulfo-D-glucosamine sulfohydrolase	C01075[c] + C00001[c] --> C00329[c] + C00059[c]	(pvm:113829181)	pvm:113829181	rn00520	0	1000	0		3.10.1.1	Carbohydrate metabolism	N
R01964	ITP:D-glucosamine 6-phosphotransferase	C00081[c] + C00329[c] --> C00104[c] + C00352[c]	(pvm:113813437) or (pvm:113813438)	pvm:113813437;pvm:113813438	rn00230	0	1000	0		2.7.1.1	Nucleotide metabolism	N
R01965	dATP:D-glucosamine 6-phosphotransferase	C00131[c] + C00329[c] --> C00206[c] + C00352[c]	(pvm:113813437) or (pvm:113813438)	pvm:113813437;pvm:113813438	rn00230	0	1000	0		2.7.1.1	Nucleotide metabolism	N
R01975	(S)-3-Hydroxybutanoyl-CoA:NAD+ oxidoreductase	C01144[c] + C00003[c] <=> C00332[c] + C00004[c] + C00080[c]	(pvm:113813321) or (pvm:113814456)	pvm:113813321;pvm:113814456	rn00071	-1000	1000	0		1.1.1.35	Lipid metabolism	Y
R01978	acetyl-CoA:acetoacetyl-CoA C-acetyltransferase (thioester-hydrolysing, carboxymethyl-forming)	C00356[c] + C00010[c] --> C00024[c] + C00001[c] + C00332[c]	(pvm:113812939)	pvm:113812939	rn00072	0	1000	0		2.3.3.10	Lipid metabolism	N
R01986	4-Aminobutyraldehyde:NAD+ oxidoreductase	C00555[c] + C00006[c] + C00001[c] --> C00334[c] + C00005[c] + C00080[c]	(pvm:113825010) or (pvm:113825013) or (pvm:113826103) or (pvm:113826145) or (pvm:113826151) or (pvm:113826159) or (pvm:113826162) or (pvm:113816548)	pvm:113825010;pvm:113825013;pvm:113826103;pvm:113826145;pvm:113826151;pvm:113826159;pvm:113826162;pvm:113816548	rn00330	0	1000	0		1.2.1.3	Amino acid metabolism	N
R01993	(S)-dihydroorotate amidohydrolase	C00337[c] + C00001[c] <=> C00438[c]	(pvm:113807693)	pvm:113807693	rn00240	-1000	1000	0		3.5.2.3	Nucleotide metabolism	Y
R01999	Acyl-CoA:long-chain-alcohol O-acyltransferase	C00040[c] + C00339[c] --> C00010[c] + C02434[c]	(pvm:113827476)	pvm:113827476	rn00073	0	1000	0		2.3.1.75	Lipid metabolism	N
R02003	Geranyl-diphosphate:isopentenyl-diphosphate geranyltrans-transferase	C00341[c] + C00129[c] --> C00013[c] + C00448[c]	(pvm:113821880) or (pvm:113821885) or (pvm:113823021)	pvm:113821880;pvm:113821885;pvm:113823021	rn00900	0	1000	0		2.5.1.10	Metabolism of terpenoids and polyketides	N
R02016	NADPH:oxidized-thioredoxin oxidoreductase	C00342[c] + C00006[c] --> C00343[c] + C00005[c] + C00080[c]	(pvm:113830545)	pvm:113830545	rn01100	0	1000	0		1.8.1.9	Global and overview maps	N
R02017	2'-Deoxyadenosine 5'-diphosphate:oxidized-thioredoxin 2'-oxidoreductase	C00206[c] + C00343[c] + C00001[c] --> C00342[c] + C00008[c]	(pvm:113821498)	pvm:113821498	rn00230	0	1000	0		1.17.4.1	Nucleotide metabolism	N
R02018	2'-Deoxyuridine 5'-diphosphate:oxidized-thioredoxin 2'-oxidoreductase	C01346[c] + C00343[c] + C00001[c] --> C00342[c] + C00015[c]	(pvm:113821498)	pvm:113821498	rn00240	0	1000	0		1.17.4.1	Nucleotide metabolism	N
R02019	2'-Deoxyguanosine 5'-diphosphate:oxidized-thioredoxin 2'-oxidoreductase	C00361[c] + C00343[c] + C00001[c] --> C00035[c] + C00342[c]	(pvm:113821498)	pvm:113821498	rn00230	0	1000	0		1.17.4.1	Nucleotide metabolism	N
R02024	2'-Deoxycytidine diphosphate:oxidized-thioredoxin 2'-oxidoreductase	C00705[c] + C00343[c] + C00001[c] --> C00342[c] + C00112[c]	(pvm:113821498)	pvm:113821498	rn00240	0	1000	0		1.17.4.1	Nucleotide metabolism	N
R02030	CDP-diacylglycerol:phosphatidylglycerol 3-phosphatidyltransferase	C00344[c] + C00269[c] --> C05980[c] + C00055[c]	(pvm:113819833)	pvm:113819833	rn00564	0	1000	0		2.7.8.41	Lipid metabolism	N
R02035	6-Phospho-D-glucono-1,5-lactone lactonohydrolase	C01236[c] + C00001[c] <=> C00345[c]	(pvm:113800990)	pvm:113800990	rn00030	-1000	1000	0		3.1.1.31	Carbohydrate metabolism	Y
R02037	S-Adenosyl-L-methionine:ethanolamine-phosphate N-methyltransferase	C00019[c] + C00346[c] --> C00021[c] + C01210[c]	(pvm:113803116) or (pvm:113803123) or (pvm:113803123) or (pvm:113803137) or (pvm:113804220) or (pvm:113804228)	pvm:113803116;pvm:113803123;pvm:113803123;pvm:113803137;pvm:113804220;pvm:113804228	rn00564	0	1000	0		2.1.1.103	Lipid metabolism	N
R02038	CTP:ethanolamine-phosphate cytidylyltransferase	C00063[c] + C00346[c] --> C00013[c] + C00570[c]	(pvm:113826839)	pvm:113826839	rn00564	0	1000	0		2.7.7.14	Lipid metabolism	N
R02047	3-Hydroxy-2-methylpropanoate:NAD+ oxidoreductase	C01188[c] + C00003[c] --> C00349[c] + C00004[c] + C00080[c]	(pvm:113812167)	pvm:113812167	rn00730	0	1000	0		1.1.1.31	Metabolism of cofactors and vitamins	N
R02050	(R)-3-Amino-2-methylpropanoate:pyruvate aminotransferase	C01205[c] + C00022[c] <=> C00349[c] + C00041[c]	(pvm:113809949)	pvm:113809949	rn00280	-1000	1000	0		2.6.1.40	Amino acid metabolism	Y
R02051	phosphatidylethanolamine phosphatidohydrolase	C00350[c] + C00001[c] --> C00189[c] + C00416[c]	(pvm:113824601) or (pvm:113824614) or (pvm:113824615) or (pvm:113824616) or (pvm:113824636) or (pvm:113824661) or (pvm:113825750) or (pvm:113825759) or (pvm:113825768) or (pvm:113825776)	pvm:113824601;pvm:113824614;pvm:113824615;pvm:113824616;pvm:113824636;pvm:113824661;pvm:113825750;pvm:113825759;pvm:113825768;pvm:113825776	rn00564	0	1000	0		3.1.4.4	Lipid metabolism	N
R02053	phosphatidylethanolamine 2-acylhydrolase	C00350[c] + C00001[c] --> C04438[c] + C00162[c]	(pvm:113800992) or (pvm:113800996) or (pvm:113801002) or (pvm:113801003) or (pvm:113801004) or (pvm:113801005) or (pvm:113801006)	pvm:113800992;pvm:113800996;pvm:113801002;pvm:113801003;pvm:113801004;pvm:113801005;pvm:113801006	rn00564	0	1000	0		3.1.1.4	Lipid metabolism	N
R02055	Phsophatidyl-L-serine carboxy-lyase	C02737[c] --> C00350[c] + C00011[c]	(pvm:113815295)	pvm:113815295	rn00564	0	1000	0		4.1.1.65	Lipid metabolism	N
R02057	CDPethanolamine:1,2-diacylglycerol ethanolaminephosphotransferase	C00570[c] + C00641[c] --> C00055[c] + C00350[c]	(pvm:113824240) or (pvm:113824240) or (pvm:113824281)	pvm:113824240;pvm:113824240;pvm:113824281	rn00564	0	1000	0		2.7.8.1	Lipid metabolism	N
R02058	acetyl-CoA:D-glucosamine-6-phosphate N-acetyltransferase	C00024[c] + C00352[c] --> C00010[c] + C00357[c]	(pvm:113816960)	pvm:113816960	rn00520	0	1000	0		2.3.1.4	Carbohydrate metabolism	N
R02059	N-Acetyl-D-glucosamine-6-phosphate amidohydrolase	C00357[c] + C00001[c] --> C00352[c] + C00033[c]	(pvm:113825233)	pvm:113825233	rn00520	0	1000	0		3.5.1.25	Carbohydrate metabolism	N
R02061	trans,trans-Farnesyl-diphosphate:isopentenyl-diphosphate farnesyltranstransferase	C00448[c] + C00129[c] --> C00013[c] + C00353[c]	(pvm:5333212) or (pvm:5333217)	pvm:5333212;pvm:5333217	rn00900	0	1000	0		2.5.1.29	Metabolism of terpenoids and polyketides	N
R02082	(R)-Mevalonate:NADP+ oxidoreductase (CoA acylating)	C00418[c] + C00010[c] + 2 C00006[c] --> C00356[c] + 2 C00005[c] + 2 C00080[c]	(pvm:113813269)	pvm:113813269	rn00900	0	1000	0		1.1.1.34	Metabolism of terpenoids and polyketides	N
R02084	succinyl-CoA:3-hydroxy-3-methylglutarate CoA-transferase	C00091[c] + C03761[c] --> C00042[c] + C00356[c]	(pvm:113826602)	pvm:113826602	rn00020	0	1000	0		2.8.3.13	Carbohydrate metabolism	N
R02085	(S)-3-Hydroxy-3-methylglutaryl-CoA hydro-lyase (trans-3-methylglutaconyl-CoA-forming)	C00356[c] <=> C03231[c] + C00001[c]	(pvm:113815012) or (pvm:113815012)	pvm:113815012;pvm:113815012	rn00280	-1000	1000	0		4.2.1.18	Amino acid metabolism	Y
R02091	dGTP:cytidine 5'-phosphotransferase	C00286[c] + C00475[c] --> C00361[c] + C00055[c]	(pvm:113803732) or (pvm:113803763)	pvm:113803732;pvm:113803763	rn00240	0	1000	0		2.7.1.48	Nucleotide metabolism	N
R02092	dTDP phosphohydrolase	C00363[c] + C00001[c] --> C00364[c] + C00009[c]	(pvm:113820751)	pvm:113820751	rn00240	0	1000	0		3.6.1.5	Nucleotide metabolism	N
R02093	ATP:dTDP phosphotransferase	C00002[c] + C00363[c] <=> C00008[c] + C00459[c]	(pvm:113821087) or (pvm:113821105) or (pvm:113821107)	pvm:113821087;pvm:113821105;pvm:113821107	rn00240	-1000	1000	0		2.7.4.6	Nucleotide metabolism	Y
R02096	dTTP:cytidine 5'-phosphotransferase	C00459[c] + C00475[c] --> C00363[c] + C00055[c]	(pvm:113803732) or (pvm:113803763)	pvm:113803732;pvm:113803763	rn00240	0	1000	0		2.7.1.48	Nucleotide metabolism	N
R02097	dTTP:uridine 5'-phosphotransferase	C00459[c] + C00299[c] --> C00363[c] + C00105[c]	(pvm:113803732) or (pvm:113803763)	pvm:113803732;pvm:113803763	rn00240	0	1000	0		2.7.1.48	Nucleotide metabolism	N
R02099	ATP:deoxyuridine 5'-phosphotransferase	C00002[c] + C00526[c] --> C00008[c] + C00365[c]	(pvm:113799947)	pvm:113799947	rn00240	0	1000	0		2.7.1.21	Nucleotide metabolism	N
R02101	5,10-Methylenetetrahydrofolate:dUMP C-methyltransferase	C00365[c] + C00143[c] <=> C00415[c] + C00364[c]	(pvm:113817100)	pvm:113817100	rn00670	-1000	1000	0		2.1.1.45	Metabolism of cofactors and vitamins	Y
R02103	xanthine:NAD+ oxidoreductase	C00385[c] + C00003[c] + C00001[c] --> C00366[c] + C00004[c] + C00080[c]	(pvm:113818032) or (pvm:113818059) or (pvm:113819175) or (pvm:113819187) or (pvm:113819198) or (pvm:113819205) or (pvm:113819214) or (pvm:113819217)	pvm:113818032;pvm:113818059;pvm:113819175;pvm:113819187;pvm:113819198;pvm:113819205;pvm:113819214;pvm:113819217	rn00230	0	1000	0		1.17.1.4	Nucleotide metabolism	N
R02106	urate:oxygen oxidoreductase	C00366[c] + C00007[c] + C00001[c] --> C11821[c] + C00027[c]	(pvm:113828324)	pvm:113828324	rn00230	0	1000	0		1.7.3.3	Nucleotide metabolism	N
R02107	Xanthine:oxygen oxidoreductase	C00385[c] + C00001[c] + C00007[c] --> C00366[c] + C00027[c]	(pvm:113819219) or (pvm:113820335) or (pvm:113820343) or (pvm:113820345) or (pvm:113820345) or (pvm:113820385) or (pvm:113820388) or (pvm:113821490)	pvm:113819219;pvm:113820335;pvm:113820343;pvm:113820345;pvm:113820345;pvm:113820385;pvm:113820388;pvm:113821490	rn00230	0	1000	0		1.17.3.2	Nucleotide metabolism	N
R02108	1,4-alpha-D-Glucan glucanohydrolase	C00369[c] + C00001[c] --> C00721[c] + C00369[c]	(pvm:113829155) or (pvm:113829189) or (pvm:113829191) or (pvm:113829191) or (pvm:113829192) or (pvm:113829192)	pvm:113829155;pvm:113829189;pvm:113829191;pvm:113829191;pvm:113829192;pvm:113829192	rn00500	0	1000	0		3.2.1.1	Carbohydrate metabolism	N
R02109	Dextrin 6-alpha-D-glucanohydrolase	C00369[c] + C00001[c] --> C00718[c] + C00267[c]	(pvm:113824347) or (pvm:113824348)	pvm:113824347;pvm:113824348	rn00500	0	1000	0		3.2.1.33	Carbohydrate metabolism	N
R02110	1,4-alpha-D-Glucan:1,4-alpha-D-glucan 6-alpha-D-(1,4-alpha-D-glucano)-transferase	C00718[c] --> C00369[c]	(pvm:113826071)	pvm:113826071	rn00500	0	1000	0		2.4.1.18	Carbohydrate metabolism	N
R02111	1,4-alpha-D-Glucan:orthophosphate alpha-D-glucosyltransferase	C00369[c] + C00009[c] --> C00718[c] + C00103[c]	(pvm:113812950)	pvm:113812950	rn00500	0	1000	0		2.4.1.1	Carbohydrate metabolism	N
R02115	Steryl-ester acylhydrolase	C01958[c] + C00001[c] --> C00370[c] + C00162[c]	(pvm:113827769) or (pvm:113827780) or (pvm:113828831) or (pvm:113828849) or (pvm:113828857) or (pvm:113828872)	pvm:113827769;pvm:113827780;pvm:113828831;pvm:113828849;pvm:113828857;pvm:113828872	rn01100	0	1000	0		3.1.1.13	Global and overview maps	N
R02144	S-adenosyl-L-methionine:carnosine N-methyltransferase	C00019[c] + C00386[c] --> C00021[c] + C01262[c]	(pvm:113806514)	pvm:113806514	rn00340	0	1000	0		2.1.1.22	Amino acid metabolism	N
R02156	quercetin:oxygen 2,3-oxidoreductase (decyclizing)	C00389[c] + C00007[c] --> C04524[c] + C00237[c]	(pvm:113808612)	pvm:113808612	rn00941	0	1000	0		1.13.11.24	Biosynthesis of other secondary metabolites	N
R02180	3'-Phosphoadenylylsulfate:chondroitin 4'-sulfotransferase	C00053[c] + C00401[c] --> C00054[c] + C00634[c]	(pvm:113826729) or (pvm:113826744) or (pvm:113826749) or (pvm:113827876) or (pvm:113827887) or (pvm:113827909) or (pvm:113827909) or (pvm:113828991) or (pvm:113828992) or (pvm:113829016) or (pvm:113829016) or (pvm:113829016) or (pvm:113829017) or (pvm:113829022) or (pvm:113830107) or (pvm:113830107) or (pvm:113830107) or (pvm:113830146) or (pvm:113830150) or (pvm:113826580) or (pvm:113826580) or …	pvm:113826729;pvm:113826744;pvm:113826749;pvm:113827876;pvm:113827887;pvm:113827909;pvm:113827909;pvm:113828991;pvm:113828992;pvm:113829016;pvm:113829016;pvm:113829016;pvm:113829017;pvm:113829022;pvm:113830107;pvm:113830107;pvm:113830107;pvm:113830146;pvm:113830150;pvm:113826580;pvm:113826580;pvm:113826602	rn00532	0	1000	0		2.8.2.5	Glycan biosynthesis and metabolism	N
R02181	3'-Phosphoadenylylsulfate:chondroitin 6'-sulfotransferase	C00053[c] + C00401[c] --> C00054[c] + C00635[c]	(pvm:113825517) or (pvm:113825518) or (pvm:113825543) or (pvm:113825544) or (pvm:113825545)	pvm:113825517;pvm:113825518;pvm:113825543;pvm:113825544;pvm:113825545	rn00230	0	1000	0		2.8.2.17	Nucleotide metabolism	N
R02183	UDP-N-acetyl-D-galactosamine:polypeptide N-acetylgalactosaminyl transferase	C00203[c] + C00403[c] --> C00015[c] + C04387[c]	(pvm:113823577) or (pvm:113823632) or (pvm:113824789) or (pvm:113825898) or (pvm:113825904) or (pvm:113825910) or (pvm:113825929) or (pvm:113825942) or (pvm:113825947) or (pvm:113825944) or (pvm:113825951) or (pvm:113828236)	pvm:113823577;pvm:113823632;pvm:113824789;pvm:113825898;pvm:113825904;pvm:113825910;pvm:113825929;pvm:113825942;pvm:113825947;pvm:113825944;pvm:113825951;pvm:113828236	rn00240	0	1000	0		2.4.1.41	Nucleotide metabolism	N
R02194	Ferulate:CoA ligase (AMP-forming)	C00002[c] + C01494[c] + C00010[c] --> C00020[c] + C00013[c] + C00406[c]	(pvm:113816148) or (pvm:113823190) or (pvm:113824334) or (pvm:113830072) or (pvm:113830090) or (pvm:113803418) or (pvm:113804620) or (pvm:113804621) or (pvm:113808051) or (pvm:113808051) or (pvm:113814950)	pvm:113816148;pvm:113823190;pvm:113824334;pvm:113830072;pvm:113830090;pvm:113803418;pvm:113804620;pvm:113804621;pvm:113808051;pvm:113808051;pvm:113814950	rn00940	0	1000	0		6.2.1.12	Biosynthesis of other secondary metabolites	N
R02199	L-Isoleucine:2-oxoglutarate aminotransferase	C00407[c] + C00026[c] <=> C00671[c] + C00025[c]	(pvm:113809964)	pvm:113809964	rn00280	-1000	1000	0		2.6.1.42	Amino acid metabolism	Y
R02204	L-Pipecolate:oxygen 1,6-oxidoreductase	C00408[c] + C00007[c] --> C00450[c] + C00027[c]	(pvm:113827002) or (pvm:113827009) or (pvm:113827042) or (pvm:113828152) or (pvm:113828152)	pvm:113827002;pvm:113827009;pvm:113827042;pvm:113828152;pvm:113828152	rn00310	0	1000	0		1.5.3.7	Amino acid metabolism	N
R02208	5alpha-pregnane-3,20-dione:NADP+ delta4-oxidoreductase	C03681[c] + C00006[c] --> C00410[c] + C00005[c] + C00080[c]	(pvm:113818992) or (pvm:113818994) or (pvm:113819003)	pvm:113818992;pvm:113818994;pvm:113819003	rn00140	0	1000	0		1.3.1.22	Lipid metabolism	N
R02221	Sinapate:CoA ligase (AMP-forming)	C00002[c] + C00482[c] + C00010[c] --> C00020[c] + C00013[c] + C00411[c]	(pvm:113816148) or (pvm:113823190) or (pvm:113824334) or (pvm:113830072) or (pvm:113830090) or (pvm:113803418) or (pvm:113804620) or (pvm:113804621) or (pvm:113808051) or (pvm:113808051) or (pvm:113814950)	pvm:113816148;pvm:113823190;pvm:113824334;pvm:113830072;pvm:113830090;pvm:113803418;pvm:113804620;pvm:113804621;pvm:113808051;pvm:113808051;pvm:113814950	rn00940	0	1000	0		6.2.1.12	Biosynthesis of other secondary metabolites	N
R02222	steroyl-CoA,hydrogen-donor:oxygen oxidoreductase	C00412[c] + 2 C00999[c] + C00007[c] + 2 C00080[c] --> C00510[c] + 2 C00996[c] + 2 C00001[c]	(pvm:113813193)	pvm:113813193	rn01040	0	1000	0		1.14.19.1	Lipid metabolism	N
R02235	dihydrofolate:NAD+ oxidoreductase	C00415[c] + C00003[c] <=> C00504[c] + C00004[c] + C00080[c]	(pvm:113821217)	pvm:113821217	rn00670	-1000	1000	0		1.5.1.3	Metabolism of cofactors and vitamins	Y
R02236	dihydrofolate:NADP+ oxidoreductase	C00415[c] + C00006[c] <=> C00504[c] + C00005[c] + C00080[c]	(pvm:113821217)	pvm:113821217	rn00670	-1000	1000	0		1.5.1.3	Metabolism of cofactors and vitamins	Y
R02240	ATP:1,2-diacylglycerol 3-phosphotransferase	C00002[c] + C00641[c] --> C00008[c] + C00416[c]	(pvm:113814629) or (pvm:113814632) or (pvm:113815859) or (pvm:113815882) or (pvm:113815914)	pvm:113814629;pvm:113814632;pvm:113815859;pvm:113815882;pvm:113815914	rn00561	0	1000	0		2.7.1.107	Lipid metabolism	N
R02241	acyl-CoA:1-acyl-sn-glycerol-3-phosphate 2-O-acyltransferase	C00416[c] + C00010[c] --> C00681[c] + C00040[c]	(pvm:113820423) or (pvm:113820442) or (pvm:113820483) or (pvm:113820484) or (pvm:113821590) or (pvm:113821604)	pvm:113820423;pvm:113820442;pvm:113820483;pvm:113820484;pvm:113821590;pvm:113821604	rn00561	0	1000	0		2.3.1.51	Lipid metabolism	N
R02245	ATP:(R)-mevalonate 5-phosphotransferase	C00002[c] + C00418[c] --> C00008[c] + C01107[c]	(pvm:113802630)	pvm:113802630	rn00900	0	1000	0		2.7.1.36	Metabolism of terpenoids and polyketides	N
R02248	Polynucleotide 3'-phosphohydrolase	C03463[c] + C00001[c] --> C00419[c] + C00009[c]	(pvm:113804514)	pvm:113804514	rn01100	0	1000	0		3.1.3.32	Global and overview maps	N
R02250	triacylglycerol acylhydrolase	C00422[c] + C00001[c] --> C00641[c] + C00162[c]	(pvm:113800971) or (pvm:113800987) or (pvm:113800988) or (pvm:113800989)	pvm:113800971;pvm:113800987;pvm:113800988;pvm:113800989	rn00561	0	1000	0		3.1.1.3	Lipid metabolism	N
R02251	acyl-CoA:1,2-diacyl-sn-glycerol O-acyltransferase	C00422[c] + C00010[c] --> C00641[c] + C00040[c]	(pvm:113801308)	pvm:113801308	rn00561	0	1000	0		2.3.1.20	Lipid metabolism	N
R02255	trans-Cinnamate:CoA ligase (AMP-forming)	C00002[c] + C00423[c] + C00010[c] --> C00020[c] + C00013[c] + C00540[c]	(pvm:113816148) or (pvm:113823190) or (pvm:113824334) or (pvm:113830072) or (pvm:113830090) or (pvm:113803418) or (pvm:113804620) or (pvm:113804621) or (pvm:113808051) or (pvm:113808051) or (pvm:113814950)	pvm:113816148;pvm:113823190;pvm:113824334;pvm:113830072;pvm:113830090;pvm:113803418;pvm:113804620;pvm:113804621;pvm:113808051;pvm:113808051;pvm:113814950	rn00940	0	1000	0		6.2.1.12	Biosynthesis of other secondary metabolites	N
R02265	(5Z,13E)-(15S)-9alpha,11alpha-epidioxy-15-hydroxyprosta-5,13- dienoate E-isomerase	C00427[c] --> C00584[c]	(pvm:113800315) or (pvm:113805267) or (pvm:113811058)	pvm:113800315;pvm:113805267;pvm:113811058	rn00590	0	1000	0		5.3.99.3	Lipid metabolism	N
R02266	(5Z,13E)-(15S)-9alpha,11alpha-epidioxy-15-hydroxyprosta-5,13- dienoate D-isomerase	C00427[c] --> C00696[c]	(pvm:113822797) or (pvm:113800308)	pvm:113822797;pvm:113800308	rn00590	0	1000	0		5.3.99.2	Lipid metabolism	N
R02268	(5Z,13E)-(15S)-9alpha,11alpha-Epidioxy-15-hydroxyprosta-5,13-thromboxane-A2-isomerase	C00427[c] --> C02198[c]	(pvm:113817021) or (pvm:113819329)	pvm:113817021;pvm:113819329	rn00590	0	1000	0		5.3.99.5	Lipid metabolism	N
R02269	5,6-Dihydrouracil amidohydrolase	C00429[c] + C00001[c] <=> C02642[c]	(pvm:113807691)	pvm:113807691	rn00240	-1000	1000	0		3.5.2.2	Nucleotide metabolism	Y
R02287	5-Formiminotetrahydrofolate:L-glutamate N-formiminotransferase	C00664[c] + C00025[c] <=> C00101[c] + C00439[c]	(pvm:113821713)	pvm:113821713	rn00340	-1000	1000	0		2.1.2.5	Amino acid metabolism	Y
R02288	4-imidazolone-5-propanoate amidohydrolase	C03680[c] + C00001[c] --> C00439[c]	(pvm:113807693)	pvm:113807693	rn00340	0	1000	0		3.5.2.7	Amino acid metabolism	N
R02291	L-Aspartate-4-semialdehyde:NADP+ oxidoreductase (phosphorylating)	C00441[c] + C00009[c] + C00006[c] --> C03082[c] + C00005[c] + C00080[c]	(pvm:113822687)	pvm:113822687	rn00260	0	1000	0		1.2.1.11	Amino acid metabolism	N
R02294	N-Ribosylnicotinamide:orthophosphate ribosyltransferase	C03150[c] + C00009[c] <=> C00153[c] + C00620[c] + C00080[c]	(pvm:113810046)	pvm:113810046	rn00760	-1000	1000	0		2.4.2.1	Metabolism of cofactors and vitamins	Y
R02295	Nicotinate D-ribonucleoside:orthophosphate ribosyltransferase	C05841[c] + C00009[c] <=> C00253[c] + C00620[c] + C00080[c]	(pvm:113810046)	pvm:113810046	rn00760	-1000	1000	0		2.4.2.1	Metabolism of cofactors and vitamins	Y
R02300	S-Aminomethyldihydrolipoylprotein:(6S)-tetrahydrofolate aminomethyltransferase (ammonia-forming)	C03479[c] + C00080[c] --> C00445[c] + C00001[c]	(pvm:113820606)	pvm:113820606	rn00670	0	1000	0		2.1.2.10	Metabolism of cofactors and vitamins	N
R02301	5-Formyltetrahydrofolate cyclo-ligase (ADP-forming)	C00002[c] + C03479[c] + C00080[c] --> C00008[c] + C00009[c] + C00445[c]	(pvm:113808323)	pvm:113808323	rn00670	0	1000	0		6.3.3.2	Metabolism of cofactors and vitamins	N
R02302	5-Formiminotetrahydrofolate ammonia-lyase (cyclizing)	C00664[c] + C00080[c] <=> C00445[c] + C00014[c]	(pvm:113819047)	pvm:113819047	rn00670	-1000	1000	0		4.3.1.4	Metabolism of cofactors and vitamins	Y
R02313	N6-(L-1,3-Dicarboxypropyl)-L-lysine:NAD+ oxidoreductase;	C00449[c] + C00003[c] + C00001[c] <=> C00025[c] + C04076[c] + C00004[c] + C00080[c]	(pvm:113823517) or (pvm:113823538)	pvm:113823517;pvm:113823538	rn00310	-1000	1000	0		1.5.1.9	Amino acid metabolism	Y
R02320	NTP:pyruvate O2-phosphotransferase	C00201[c] + C00022[c] --> C00454[c] + C00074[c]	(pvm:113802658) or (pvm:113802660)	pvm:113802658;pvm:113802660	rn00620	0	1000	0		2.7.1.40	Carbohydrate metabolism	N
R02324	ATP:N-ribosylnicotinamide 5'-phosphotransferase	C00002[c] + C03150[c] --> C00008[c] + C00455[c] + C00080[c]	(pvm:113801014) or (pvm:113801015)	pvm:113801014;pvm:113801015	rn00760	0	1000	0		2.7.1.22	Metabolism of cofactors and vitamins	N
R02326	ATP:dCDP phosphotransferase	C00002[c] + C00705[c] <=> C00008[c] + C00458[c]	(pvm:113821087) or (pvm:113821105) or (pvm:113821107)	pvm:113821087;pvm:113821105;pvm:113821107	rn00240	-1000	1000	0		2.7.4.6	Nucleotide metabolism	Y
R02327	dCTP:uridine 5'-phosphotransferase	C00458[c] + C00299[c] --> C00705[c] + C00105[c]	(pvm:113803732) or (pvm:113803763)	pvm:113803732;pvm:113803763	rn00240	0	1000	0		2.7.1.48	Nucleotide metabolism	N
R02331	ATP:dUDP phosphotransferase	C00002[c] + C01346[c] <=> C00008[c] + C00460[c]	(pvm:113821087) or (pvm:113821105) or (pvm:113821107)	pvm:113821087;pvm:113821105;pvm:113821107	rn00240	-1000	1000	0		2.7.4.6	Nucleotide metabolism	Y
R02332	dUTP:uridine 5'-phosphotransferase	C00460[c] + C00299[c] --> C01346[c] + C00105[c]	(pvm:113803732) or (pvm:113803763)	pvm:113803732;pvm:113803763	rn00240	0	1000	0		2.7.1.48	Nucleotide metabolism	N
R02334	[1,4-(N-Acetyl-beta-D-glucosaminyl)]n glycanohydrolase	C00461[c] + C00001[c] --> C01674[c] + C00461[c]	(pvm:113830326) or (pvm:113830326) or (pvm:113830327) or (pvm:113830338) or (pvm:113830345) or (pvm:113830347) or (pvm:113830349) or (pvm:113830370) or (pvm:113817379) or (pvm:113817380) or (pvm:113817395) or (pvm:113817398) or (pvm:113817408) or (pvm:113817415) or (pvm:113817416) or (pvm:113818503) or (pvm:113818504) or (pvm:113818535) or (pvm:113818542) or (pvm:113818563) or (pvm:113818567) or …	pvm:113830326;pvm:113830326;pvm:113830327;pvm:113830338;pvm:113830345;pvm:113830347;pvm:113830349;pvm:113830370;pvm:113817379;pvm:113817380;pvm:113817395;pvm:113817398;pvm:113817408;pvm:113817415;pvm:113817416;pvm:113818503;pvm:113818504;pvm:113818535;pvm:113818542;pvm:113818563;pvm:113818567;pvm:113819729;pvm:113819738;pvm:113819759;pvm:113819760	rn00520	0	1000	0		3.2.1.14	Carbohydrate metabolism	N
R02335	UDP-N-acetyl-D-glucosamine:chitin 4-beta-N-acetylglucosaminyl-transferase	C00043[c] + C00461[c] --> C00015[c] + C00461[c]	(pvm:113822651)	pvm:113822651	rn00520	0	1000	0		2.4.1.16	Carbohydrate metabolism	N
R02354		C00468[c] + C00080[c] + C00007[c] + C00004[c] --> C05298[c] + C00003[c] + C00001[c]	(pvm:113829697) or (pvm:113801218) or (pvm:113802729) or (pvm:113802766) or (pvm:113803893) or (pvm:113803906) or (pvm:113803903) or (pvm:113803928) or (pvm:113805029) or (pvm:113805029) or (pvm:113805053)	pvm:113829697;pvm:113801218;pvm:113802729;pvm:113802766;pvm:113803893;pvm:113803906;pvm:113803903;pvm:113803928;pvm:113805029;pvm:113805029;pvm:113805053	rn00140	0	1000	0		1.14.14.1	Lipid metabolism	N
R02355		C00468[c] + C00080[c] + C00007[c] + C00005[c] --> C05298[c] + C00006[c] + C00001[c]	(pvm:113829697) or (pvm:113801218) or (pvm:113802729) or (pvm:113802766) or (pvm:113803893) or (pvm:113803906) or (pvm:113803903) or (pvm:113803928) or (pvm:113805029) or (pvm:113805029) or (pvm:113805053)	pvm:113829697;pvm:113801218;pvm:113802729;pvm:113802766;pvm:113803893;pvm:113803906;pvm:113803903;pvm:113803928;pvm:113805029;pvm:113805029;pvm:113805053	rn00140	0	1000	0		1.14.14.1	Lipid metabolism	N
R02358	UDPglucuronate beta-D-glucuronosyltransferase(acceptor-unspecific)	C00468[c] + C00167[c] --> C11133[c] + C00015[c]	(pvm:113823738) or (pvm:113823745) or (pvm:113823747) or (pvm:113823748) or (pvm:113823750) or (pvm:113823750) or (pvm:113823785) or (pvm:113823789) or (pvm:113823789) or (pvm:113823792) or (pvm:113823795)	pvm:113823738;pvm:113823745;pvm:113823747;pvm:113823748;pvm:113823750;pvm:113823750;pvm:113823785;pvm:113823789;pvm:113823789;pvm:113823792;pvm:113823795	rn00140	0	1000	0		2.4.1.17	Lipid metabolism	N
R02363	Hydroquinone:oxygen oxidoreductase	2 C00530[c] + C00007[c] --> 2 C00472[c] + 2 C00001[c]	(pvm:113813169)	pvm:113813169	rn00350	0	1000	0		1.14.18.1	Amino acid metabolism	N
R02364	NADPH2:quinone oxidoreductase	2 C15602[c] + C00005[c] + C00080[c] --> 2 C05309[c] + C00006[c]	(pvm:113827180)	pvm:113827180	rn00480	0	1000	0		1.6.5.5	Metabolism of other amino acids	N
R02366	Acyl-CoA:retinol O-acyltransferase	C00040[c] + C00473[c] --> C00010[c] + C02075[c]	(pvm:113827476)	pvm:113827476	rn00830	0	1000	0		2.3.1.76	Metabolism of cofactors and vitamins	N
R02367	Palmitoyl-CoA:retinol O-acyltransferase	C00154[c] + C00473[c] --> C00010[c] + C02588[c]	(pvm:113827476)	pvm:113827476	rn00830	0	1000	0		2.3.1.76	Metabolism of cofactors and vitamins	N
R02371	dCTP:cytidine 5'-phosphotransferase	C00458[c] + C00475[c] --> C00705[c] + C00055[c]	(pvm:113803732) or (pvm:113803763)	pvm:113803732;pvm:113803763	rn00240	0	1000	0		2.7.1.48	Nucleotide metabolism	N
R02372	dUTP:cytidine 5'-phosphotransferase	C00460[c] + C00475[c] --> C01346[c] + C00055[c]	(pvm:113803732) or (pvm:113803763)	pvm:113803732;pvm:113803763	rn00240	0	1000	0		2.7.1.48	Nucleotide metabolism	N
R02389	UDPglucuronate beta-D-glucuronosyltransferase(acceptor-unspecific)	2 C00167[c] + C00486[c] --> 2 C00015[c] + C05787[c]	(pvm:113823738) or (pvm:113823745) or (pvm:113823747) or (pvm:113823748) or (pvm:113823750) or (pvm:113823750) or (pvm:113823785) or (pvm:113823789) or (pvm:113823789) or (pvm:113823792) or (pvm:113823795)	pvm:113823738;pvm:113823745;pvm:113823747;pvm:113823748;pvm:113823750;pvm:113823750;pvm:113823785;pvm:113823789;pvm:113823789;pvm:113823792;pvm:113823795	rn00860	0	1000	0		2.4.1.17	Metabolism of cofactors and vitamins	N
R02391	Bilirubin:NAD+ oxidoreductase	C00486[c] + C00003[c] --> C00500[c] + C00004[c] + C00080[c]	(pvm:113819009)	pvm:113819009	rn00860	0	1000	0		1.3.1.24	Metabolism of cofactors and vitamins	N
R02393	Bilirubin:NADP+ oxidoreductase	C00486[c] + C00006[c] --> C00500[c] + C00005[c] + C00080[c]	(pvm:113819009)	pvm:113819009	rn00860	0	1000	0		1.3.1.24	Metabolism of cofactors and vitamins	N
R02396	Acetyl-CoA:carnitine O-acetyltransferase	C00024[c] + C00487[c] --> C00010[c] + C02571[c]	(pvm:113826365) or (pvm:113826383)	pvm:113826365;pvm:113826383	rn00310	0	1000	0		2.3.1.7	Amino acid metabolism	N
R02397	4-Trimethylammoniobutanoate,2-oxoglutarate:oxygen oxidoreductase (3-hydroxylating)	C01181[c] + C00026[c] + C00007[c] --> C00487[c] + C00042[c] + C00011[c]	(pvm:113819349) or (pvm:113819352) or (pvm:113819386) or (pvm:113819389) or (pvm:113820536) or (pvm:113820552) or (pvm:113820552) or (pvm:113820552)	pvm:113819349;pvm:113819352;pvm:113819386;pvm:113819389;pvm:113820536;pvm:113820552;pvm:113820552;pvm:113820552	rn00310	0	1000	0		1.14.11.1	Amino acid metabolism	N
R02404	Itaconate:CoA ligase (ADP-forming)	C00002[c] + C00490[c] + C00010[c] <=> C00008[c] + C00009[c] + C00531[c]	(pvm:113824552) or (pvm:113824552) or (pvm:113824571) or (pvm:113825733)	pvm:113824552;pvm:113824552;pvm:113824571;pvm:113825733	rn00660	-1000	1000	0		6.2.1.5	Carbohydrate metabolism	Y
R02405	Itaconate:CoA ligase (GDP-forming)	C00044[c] + C00490[c] + C00010[c] --> C00035[c] + C00009[c] + C00531[c]	(pvm:113824470) or (pvm:113802516) or (pvm:113803627) or (pvm:113804700)	pvm:113824470;pvm:113802516;pvm:113803627;pvm:113804700	rn00230	0	1000	0		6.2.1.4	Nucleotide metabolism	N
R02406	Itaconate:CoA ligase (IDP-forming)	C00081[c] + C00490[c] + C00010[c] --> C00104[c] + C00009[c] + C00531[c]	(pvm:113824470) or (pvm:113802516) or (pvm:113803627) or (pvm:113804700)	pvm:113824470;pvm:113802516;pvm:113803627;pvm:113804700	rn00230	0	1000	0		6.2.1.4	Nucleotide metabolism	N
R02418	Ubiquitin-C-terminal-thiolester hydrolase	C04090[c] + C00001[c] --> C00496[c] + C00145[c]	(pvm:113808531) or (pvm:113810840) or (pvm:113814212) or (pvm:113819149) or (pvm:113820313) or (pvm:113821425) or (pvm:113821432) or (pvm:113821461) or (pvm:113821475) or (pvm:113822622) or (pvm:113824900) or (pvm:113827244) or (pvm:113827249) or (pvm:113827249) or (pvm:113827251) or (pvm:113828352) or (pvm:113829442) or (pvm:113830593) or (pvm:113830600) or (pvm:113800937) or (pvm:113800937) or …	pvm:113808531;pvm:113810840;pvm:113814212;pvm:113819149;pvm:113820313;pvm:113821425;pvm:113821432;pvm:113821461;pvm:113821475;pvm:113822622;pvm:113824900;pvm:113827244;pvm:113827249;pvm:113827249;pvm:113827251;pvm:113828352;pvm:113829442;pvm:113830593;pvm:113830600;pvm:113800937;pvm:113800937;pvm:113800946;pvm:113801001;pvm:113802559;pvm:113803688;pvm:113804788;pvm:113804789;pvm:113804806;pvm:113…	rn01100	0	1000	0		3.4.19.12	Global and overview maps	N
R02422	Allantoate amidinohydrolase	C00499[c] + C00001[c] <=> C00603[c] + C00086[c]	(pvm:113808874)	pvm:113808874	rn00230	-1000	1000	0		3.5.3.4	Nucleotide metabolism	Y
R02425	(S)-allantoin amidohydrolase	C02350[c] + C00001[c] <=> C00499[c]	(pvm:113807693)	pvm:113807693	rn00230	-1000	1000	0		3.5.2.5	Nucleotide metabolism	Y
R02433	L-cysteate:2-oxoglutarate aminotransferase	C00506[c] + C00026[c] <=> C05528[c] + C00025[c]	(pvm:113805416) or (pvm:113805442)	pvm:113805416;pvm:113805442	rn00270	-1000	1000	0		2.6.1.1	Amino acid metabolism	Y
R02457	D-Ornithine:oxygen oxidoreductase (deaminating)	C00515[c] + C00001[c] + C00007[c] --> C01110[c] + C00014[c] + C00027[c]	(pvm:113818896)	pvm:113818896	rn00472	0	1000	0		1.4.3.3	Metabolism of other amino acids	N
R02464	Sphinganine-1-phosphate pamlmitaldehyde-lyase	C01120[c] --> C00346[c] + C00517[c]	(pvm:113823600) or (pvm:113823600) or (pvm:113824777)	pvm:113823600;pvm:113823600;pvm:113824777	rn00600	0	1000	0		4.1.2.27	Lipid metabolism	N
R02467	Cysteamine:oxygen oxidoreductase	C01678[c] + C00007[c] --> C00519[c]	(pvm:113808565)	pvm:113808565	rn00430	0	1000	0		1.13.11.19	Metabolism of other amino acids	N
R02478	UDPglucuronate beta-D-glucuronosyltransferase(acceptor-unspecific)	C00523[c] + C00167[c] --> C11135[c] + C00015[c]	(pvm:113823738) or (pvm:113823745) or (pvm:113823747) or (pvm:113823748) or (pvm:113823750) or (pvm:113823750) or (pvm:113823785) or (pvm:113823789) or (pvm:113823789) or (pvm:113823792) or (pvm:113823795)	pvm:113823738;pvm:113823745;pvm:113823747;pvm:113823748;pvm:113823750;pvm:113823750;pvm:113823785;pvm:113823789;pvm:113823789;pvm:113823792;pvm:113823795	rn00140	0	1000	0		2.4.1.17	Lipid metabolism	N
R02480	Cytochrome c apocytochrome-c-lyase	C00524[c] --> C02248[c] + C00032[c]	(pvm:113829411) or (pvm:113802464)	pvm:113829411;pvm:113802464	rn00860	0	1000	0		4.4.1.17	Metabolism of cofactors and vitamins	N
R02485	deoxycytidine aminohydrolase	C00881[c] + C00001[c] --> C00526[c] + C00014[c]	(pvm:113827551)	pvm:113827551	rn00240	0	1000	0		3.5.4.5	Nucleotide metabolism	N
R02487	glutaryl-CoA:electron-transfer flavoprotein 2,3-oxidoreductase (decarboxylating)	C00527[c] + C00016[c] --> C01352[c] + C00877[c] + C00011[c]	(pvm:113827258)	pvm:113827258	rn00071	0	1000	0		1.3.8.6	Lipid metabolism	N
R02488	glutaryl-CoA:electron-transfer flavoprotein 2,3-oxidoreductase (decarboxylating)	C00527[c] + C04253[c] --> C00877[c] + C04570[c] + C00011[c]	(pvm:113827258)	pvm:113827258	rn00310	0	1000	0		1.3.8.6	Amino acid metabolism	N
R02493	ATP:pyridoxal 5'-phosphotransferase	C00002[c] + C00534[c] --> C00008[c] + C00647[c]	(pvm:113802620) or (pvm:113802630)	pvm:113802620;pvm:113802630	rn00750	0	1000	0		2.7.1.35	Metabolism of cofactors and vitamins	N
R02494	pyridoxamine-5'-phosphate phosphohydrolase	C00534[c] + C00009[c] --> C00647[c] + C00001[c]	(pvm:113817572)	pvm:113817572	rn00750	0	1000	0		3.1.3.74	Metabolism of cofactors and vitamins	N
R02497	dihydrotestosterone:NADP+ delta4-oxidoreductase	C03917[c] + C00006[c] --> C00535[c] + C00005[c] + C00080[c]	(pvm:113818992) or (pvm:113818994) or (pvm:113819003)	pvm:113818992;pvm:113818994;pvm:113819003	rn00140	0	1000	0		1.3.1.22	Lipid metabolism	N
R02502	17beta-hydroxysteroid UDP-glucuronosyltransferase	C00535[c] + C00167[c] --> C11134[c] + C00015[c]	(pvm:113823738) or (pvm:113823745) or (pvm:113823747) or (pvm:113823748) or (pvm:113823750) or (pvm:113823750) or (pvm:113823785) or (pvm:113823789) or (pvm:113823789) or (pvm:113823792) or (pvm:113823795)	pvm:113823738;pvm:113823745;pvm:113823747;pvm:113823748;pvm:113823750;pvm:113823750;pvm:113823785;pvm:113823789;pvm:113823789;pvm:113823792;pvm:113823795	rn00140	0	1000	0		2.4.1.17	Lipid metabolism	N
R02503	testosterone,NADPH---hemoprotein reductase:oxygen oxidoreductase (7alpha-hydroxylating)	C00535[c] + C03024[c] + C00007[c] --> C05291[c] + C03161[c] + C00001[c]	(pvm:113829697) or (pvm:113801218) or (pvm:113802729) or (pvm:113802766) or (pvm:113803893) or (pvm:113803906) or (pvm:113803903) or (pvm:113803928) or (pvm:113805029) or (pvm:113805029) or (pvm:113805053)	pvm:113829697;pvm:113801218;pvm:113802729;pvm:113802766;pvm:113803893;pvm:113803906;pvm:113803903;pvm:113803928;pvm:113805029;pvm:113805029;pvm:113805053	rn00140	0	1000	0		1.14.14.1	Lipid metabolism	N
R02513	Nomega,Nomega'-dimethyl-L-arginine dimethylamidohydrolase	C03626[c] + C00001[c] --> C00543[c] + C00327[c]	(pvm:113808837)	pvm:113808837	rn00220	0	1000	0		3.5.3.18	Amino acid metabolism	N
R02519	Homogentisate:oxygen 1,2-oxidoreductase (decyclizing)	C00544[c] + C00007[c] --> C01036[c]	(pvm:113810884)	pvm:113810884	rn00350	0	1000	0		1.13.11.5	Amino acid metabolism	N
R02521	4-Hydroxyphenylpyruvate:oxygen oxidoreductase (hydroxylating,decarboxylating)	C01179[c] + C00007[c] --> C00544[c] + C00011[c]	(pvm:113809704)	pvm:113809704	rn00130	0	1000	0		1.13.11.27	Metabolism of cofactors and vitamins	N
R02530	(R)-S-Lactoylglutathione methylglyoxal-lyase (isomerizing)	C03451[c] <=> C00051[c] + C00546[c]	(pvm:113802513)	pvm:113802513	rn00620	-1000	1000	0		4.4.1.5	Carbohydrate metabolism	Y
R02532	4-[(1R)-2-Amino-1-hydroxyethyl]-1,2-benzenediol:oxygen oxidoreductase(deaminating)(flavin-containing)	C00547[c] + C00001[c] + C00007[c] --> C05577[c] + C00014[c] + C00027[c]	(pvm:113818908)	pvm:113818908	rn00350	0	1000	0		1.4.3.4	Amino acid metabolism	N
R02541	Sphingomyelin cholinephosphohydrolase	C00550[c] + C00001[c] --> C00195[c] + C00588[c]	(pvm:113821066) or (pvm:113822153) or (pvm:113822154) or (pvm:113822154) or (pvm:113822166) or (pvm:113821171) or (pvm:113821182) or (pvm:113821188) or (pvm:113822274) or (pvm:113822322) or (pvm:113822324)	pvm:113821066;pvm:113822153;pvm:113822154;pvm:113822154;pvm:113822166;pvm:113821171;pvm:113821182;pvm:113821188;pvm:113822274;pvm:113822322;pvm:113822324	rn00600	0	1000	0		3.1.4.12	Lipid metabolism	N
R02556	Deoxyadenosine aminohydrolase	C00559[c] + C00001[c] <=> C05512[c] + C00014[c]	(pvm:113824077) or (pvm:113826424) or (pvm:113826425)	pvm:113824077;pvm:113826424;pvm:113826425	rn00230	-1000	1000	0		3.5.4.4	Nucleotide metabolism	Y
R02557	Deoxyadenosine:orthophosphate ribosyltransferase	C00559[c] + C00009[c] <=> C00147[c] + C00672[c]	(pvm:113810046)	pvm:113810046	rn00230	-1000	1000	0		2.4.2.1	Nucleotide metabolism	Y
R02565	p-cumic alcohol:NAD+ oxidoreductase	C00576[c] + C00003[c] + C00001[c] --> C00719[c] + C00004[c] + 2 C00080[c]	(pvm:113817729)	pvm:113817729	rn00260	0	1000	0		1.2.1.8	Amino acid metabolism	N
R02566	p-Cumic alcohol:NADP+ oxidoreductase	C00576[c] + C00006[c] + C00001[c] --> C00719[c] + C00005[c] + 2 C00080[c]	(pvm:113817729)	pvm:113817729	rn00260	0	1000	0		1.2.1.8	Amino acid metabolism	N
R02568	D-fructose 1-phosphate D-glyceraldehyde-3-phosphate-lyase	C01094[c] <=> C00111[c] + C00577[c]	(pvm:113820161) or (pvm:113821322)	pvm:113820161;pvm:113821322	rn00051	-1000	1000	0		4.1.2.13	Carbohydrate metabolism	Y
R02569	acetyl-CoA:enzyme N6-(dihydrolipoyl)lysine S-acetyltransferase	C00024[c] + C15973[c] <=> C00010[c] + C16255[c]	(pvm:113822929) or (pvm:113824020)	pvm:113822929;pvm:113824020	rn00010	-1000	1000	0		2.3.1.12	Carbohydrate metabolism	Y
R02570	succinyl-CoA:enzyme N6-(dihydrolipoyl)lysine S-succinyltransferase	C00091[c] + C15973[c] <=> C00010[c] + C16254[c]	(pvm:113826338)	pvm:113826338	rn00020	-1000	1000	0		2.3.1.61	Carbohydrate metabolism	Y
R02580	(5Z,13E)-(15S)-11alpha,15-Dihydroxy-9-oxoprost-13-enoate:NAD+15-oxidoreductase	C00584[c] + C00003[c] --> C04707[c] + C00004[c] + C00080[c]	(pvm:113812123)	pvm:113812123	rn00730	0	1000	0		1.1.1.141	Metabolism of cofactors and vitamins	N
R02585	Protein-tyrosine-phosphate phosphohydrolase	C01167[c] + C00001[c] --> C00585[c] + C00009[c]	(pvm:113806841) or (pvm:113807992) or (pvm:113808006) or (pvm:113809051) or (pvm:113809052) or (pvm:113809063) or (pvm:113809063) or (pvm:113809079) or (pvm:113809087) or (pvm:113810127) or (pvm:113810130) or (pvm:113810143) or (pvm:113811391) or (pvm:113811401) or (pvm:113811402) or (pvm:113811432) or (pvm:113811439) or (pvm:113811444) or (pvm:113812507) or (pvm:113812483) or (pvm:113812551) or …	pvm:113806841;pvm:113807992;pvm:113808006;pvm:113809051;pvm:113809052;pvm:113809063;pvm:113809063;pvm:113809079;pvm:113809087;pvm:113810127;pvm:113810130;pvm:113810143;pvm:113811391;pvm:113811401;pvm:113811402;pvm:113811432;pvm:113811439;pvm:113811444;pvm:113812507;pvm:113812483;pvm:113812551;pvm:113812552;pvm:113812556;pvm:113812556;pvm:113812557;pvm:113812558;pvm:113812569;pvm:113813618;pvm:113…	rn01100	0	1000	0		3.1.3.48	Global and overview maps	N
R02586	3'-Phosphoadenylylsulfate:protein-tyrosine O-sulfotransferase	C00053[c] + C00585[c] --> C00054[c] + C03721[c]	(pvm:113825546)	pvm:113825546	rn00230	0	1000	0		2.8.2.20	Nucleotide metabolism	N
R02590	CTP:choline-phosphate cytidylyltransferase	C00063[c] + C06459[c] --> C00013[c] + C05674[c]	(pvm:113826837)	pvm:113826837	rn00440	0	1000	0		2.7.7.15	Metabolism of other amino acids	N
R02597	N-Acylneuraminate-9-phosphate phosphohydrolase	C01200[c] + C00001[c] --> C00591[c] + C00009[c]	(pvm:113820054)	pvm:113820054	rn01100	0	1000	0		3.1.3.29	Global and overview maps	N
R02599	CTP:N-acylneuraminate cytidylyltransferase	C00063[c] + C00591[c] --> C00013[c] + C01064[c]	(pvm:113829124)	pvm:113829124	rn01100	0	1000	0		2.7.7.43	Global and overview maps	N
R02610	5alpha-cholestan-3-one:NADP+ delta4-oxidoreductase	C03238[c] + C00006[c] --> C00599[c] + C00005[c] + C00080[c]	(pvm:113818992) or (pvm:113818994) or (pvm:113819003)	pvm:113818992;pvm:113818994;pvm:113819003	rn00480	0	1000	0		1.3.1.22	Metabolism of other amino acids	N
R02619	3-sulfino-L-alanine:2-oxoglutarate aminotransferase	C00606[c] + C00026[c] --> C05527[c] + C00025[c]	(pvm:113805416) or (pvm:113805442)	pvm:113805416;pvm:113805442	rn00270	0	1000	0		2.6.1.1	Amino acid metabolism	N
R02627	S-Adenosyl-L-methionine:protein-L-histidine N-tele-methyltransferase	C00019[c] + C00615[c] --> C00021[c] + C04087[c]	(pvm:113819457)	pvm:113819457	rn00261	0	1000	0		2.1.1.85	Biosynthesis of other secondary metabolites	N
R02640	L-Gulonate:NAD+ 3-oxidoreductase	C00800[c] + C00003[c] <=> C00618[c] + C00004[c] + C00080[c]	(pvm:113821773)	pvm:113821773	rn00040	-1000	1000	0		1.1.1.45	Carbohydrate metabolism	Y
R02644	3-Oxo-delta5-steroid delta5-delat4-isomerase	C01034[c] <=> C00619[c]	(pvm:113815560)	pvm:113815560	rn01100	-1000	1000	0		5.3.3.1	Global and overview maps	Y
R02654	UDP-N-acetyl-D-glucosamine:phosphatidylinositol N-acetyl-D-glucosaminyltransferase	C00043[c] + C01194[c] --> C00015[c] + C01288[c]	(pvm:113826097)	pvm:113826097	rn00240	0	1000	0		2.4.1.198	Nucleotide metabolism	N
R02662	2-methylpropanoyl-CoA:enzyme N6-(dihydrolipoyl)lysine S-(2-methylpropanoyl)transferase	C00630[c] + C15973[c] --> C00010[c] + C15977[c]	(pvm:113825174)	pvm:113825174	rn00280	0	1000	0		2.3.1.168	Amino acid metabolism	N
R02665	3-Hydroxyanthranilate:oxygen 3,4-oxidoreductase (decyclizing)	C00632[c] + C00007[c] --> C04409[c]	(pvm:113812035)	pvm:113812035	rn00380	0	1000	0		1.13.11.6	Amino acid metabolism	N
R02668	3-Hydroxy-L-kynurenine hydrolase	C03227[c] + C00001[c] --> C00632[c] + C00041[c]	(pvm:113799986)	pvm:113799986	rn00380	0	1000	0		3.7.1.3	Amino acid metabolism	N
R02678	Indole-3-acetaldehyde:NAD+ oxidoreductase	C00637[c] + C00003[c] + C00001[c] --> C00954[c] + C00004[c] + C00080[c]	(pvm:113825010) or (pvm:113825013) or (pvm:113826103) or (pvm:113826145) or (pvm:113826151) or (pvm:113826159) or (pvm:113826162) or (pvm:113816548)	pvm:113825010;pvm:113825013;pvm:113826103;pvm:113826145;pvm:113826151;pvm:113826159;pvm:113826162;pvm:113816548	rn00380	0	1000	0		1.2.1.3	Amino acid metabolism	N
R02687	1,2-diacyl-sn-glycerol acylhydrolase	C00641[c] + C00001[c] --> C01885[c] + C00162[c]	(pvm:113800971) or (pvm:113800987) or (pvm:113800988) or (pvm:113800989)	pvm:113800971;pvm:113800987;pvm:113800988;pvm:113800989	rn00561	0	1000	0		3.1.1.3	Lipid metabolism	N
R02688	1,2-Diacyl-sn-glycerol acylhydrolase	C00641[c] + C00001[c] --> C02112[c] + C00162[c]	(pvm:113800971) or (pvm:113800987) or (pvm:113800988) or (pvm:113800989)	pvm:113800971;pvm:113800987;pvm:113800988;pvm:113800989	rn00062	0	1000	0		3.1.1.3	Lipid metabolism	N
R02701	5-Hydroxy-L-tryptophan decarboxy-lyase	C00643[c] --> C00780[c] + C00011[c]	(pvm:113812953)	pvm:113812953	rn00380	0	1000	0		4.1.1.28	Amino acid metabolism	N
R02719	xanthosine 5'-phosphate phosphohydrolase	C00655[c] + C00001[c] --> C01762[c] + C00009[c]	(pvm:113810309) or (pvm:113810321) or (pvm:113810336) or (pvm:113811537)	pvm:113810309;pvm:113810321;pvm:113810336;pvm:113811537	rn00230	0	1000	0		3.1.3.5	Nucleotide metabolism	N
R02731	D-Fructose-2,6-bisphosphate 2-phosphohydrolase	C00665[c] + C00001[c] --> C05345[c] + C00009[c]	(pvm:113806787) or (pvm:113806828)	pvm:113806787;pvm:113806828	rn00051	0	1000	0		3.1.3.46	Carbohydrate metabolism	N
R02732	ATP:D-fructose-6-phosphate 2-phosphotransferase	C00002[c] + C05345[c] --> C00008[c] + C00665[c]	(pvm:113813442)	pvm:113813442	rn00051	0	1000	0		2.7.1.105	Carbohydrate metabolism	N
R02740	alpha-D-Glucose 6-phosphate ketol-isomerase	C00668[c] <=> C05345[c]	(pvm:113813181)	pvm:113813181	rn00010	-1000	1000	0		5.3.1.9	Carbohydrate metabolism	Y
R02743	gamma-L-glutamyl-L-cysteine gamma-glutamyl cyclotransferase (5-oxoproline-forming)	C00669[c] --> C01879[c] + C00097[c]	(pvm:113828351)	pvm:113828351	rn00480	0	1000	0		4.3.2.9	Metabolism of other amino acids	N
R02746	1-Acyl-sn-glycero-3-phosphocholine acylhydrolase	C04230[c] + C00001[c] --> C00670[c] + C00162[c]	(pvm:113802580) or (pvm:113803646) or (pvm:113803653) or (pvm:113803690)	pvm:113802580;pvm:113803646;pvm:113803653;pvm:113803690	rn00564	0	1000	0		3.1.1.5	Lipid metabolism	N
R02747	2-Acyl-sn-glycero-3-phosphocholine acylhydrolase	C04233[c] + C00001[c] --> C00670[c] + C00162[c]	(pvm:113802580) or (pvm:113803646) or (pvm:113803653) or (pvm:113803690)	pvm:113802580;pvm:113803646;pvm:113803653;pvm:113803690	rn00564	0	1000	0		3.1.1.5	Lipid metabolism	N
R02749	2-deoxy-D-ribose 1-phosphate 1,5-phosphomutase	C00672[c] <=> C00673[c]	(pvm:113822890) or (pvm:113822923)	pvm:113822890;pvm:113822923	rn00030	-1000	1000	0		5.4.2.7	Carbohydrate metabolism	Y
R02757	ATP:acylglycerol 3-phosphotransferase	C00002[c] + C01885[c] --> C00008[c] + C00681[c]	(pvm:113808337)	pvm:113808337	rn00561	0	1000	0		2.7.1.94	Lipid metabolism	N
R02758	ATP:acylglycerol 3-phosphotransferase	C00002[c] + C02112[c] --> C00008[c] + C03974[c]	(pvm:113808337)	pvm:113808337	rn00230	0	1000	0		2.7.1.94	Nucleotide metabolism	N
R02765	Methylmalonyl-CoA epimerase	C01213[c] <=> C00683[c]	(pvm:113819971)	pvm:113819971	rn00280	-1000	1000	0		5.1.99.1	Amino acid metabolism	Y
R02769	phosphoenolpyruvate:N-acyl-D-mannosamine-6-phosphate C-(1-carboxyvinyl)transferase (phosphate-hydrolysing, 2-carboxy-2-oxoethyl-forming);	C01200[c] + C00009[c] --> C00686[c] + C00074[c] + C00001[c]	(pvm:113802081)	pvm:113802081	rn01100	0	1000	0		2.5.1.57	Global and overview maps	N
R02778	Trehalose-6-phosphate phosphohydrolase	C00689[c] + C00001[c] --> C01083[c] + C00009[c]	(pvm:113808091)	pvm:113808091	rn00500	0	1000	0		3.1.3.12	Carbohydrate metabolism	N
R02805	P1,P4-Bis(5'-nucleosyl)-tetraphosphate nucleotidohydrolase	C04392[c] + C00001[c] --> C00700[c] + C00655[c]	(pvm:113813496)	pvm:113813496	rn00230	0	1000	0		3.6.1.17	Nucleotide metabolism	N
R02821	Trimethylaminoacetate:L-homosysteine S-methyltransferase	C00719[c] + C00155[c] --> C01026[c] + C00073[c]	(pvm:113817107) or (pvm:113817114)	pvm:113817107;pvm:113817114	rn00260	0	1000	0		2.1.1.5	Amino acid metabolism	N
R02824	glutathione:insulin oxidoreductase	C00723[c] + 2 C00051[c] --> C02288[c] + C00127[c]	(pvm:113802029)	pvm:113802029	rn00480	0	1000	0		1.8.4.2	Metabolism of other amino acids	N
R02848	ATP:D-hexose 6-phosphotransferase	C00002[c] + C00738[c] --> C00008[c] + C02965[c]	(pvm:113813437) or (pvm:113813438)	pvm:113813437;pvm:113813438	rn00230	0	1000	0		2.7.1.1	Nucleotide metabolism	N
R02849	ITP:D-hexose 6-phosphotransferase	C00081[c] + C00738[c] --> C00104[c] + C02965[c]	(pvm:113813437) or (pvm:113813438)	pvm:113813437;pvm:113813438	rn00230	0	1000	0		2.7.1.1	Nucleotide metabolism	N
R02850	dATP:D-hexose 6-phosphotransferase	C00131[c] + C00738[c] --> C00206[c] + C02965[c]	(pvm:113813437) or (pvm:113813438)	pvm:113813437;pvm:113813438	rn00230	0	1000	0		2.7.1.1	Nucleotide metabolism	N
R02853	D-O-Phosphoserine phosphohydrolase	C02532[c] + C00001[c] --> C00740[c] + C00009[c]	(pvm:113820062)	pvm:113820062	rn01100	0	1000	0		3.1.3.3	Global and overview maps	N
R02865	ATP:D-hexose 6-phosphotransferase	C00002[c] + C00794[c] --> C00008[c] + C01096[c]	(pvm:113813437) or (pvm:113813438)	pvm:113813437;pvm:113813438	rn00230	0	1000	0		2.7.1.1	Nucleotide metabolism	N
R02867	ITP:D-hexose 6-phosphotransferase	C00081[c] + C00794[c] --> C00104[c] + C01096[c]	(pvm:113813437) or (pvm:113813438)	pvm:113813437;pvm:113813438	rn00230	0	1000	0		2.7.1.1	Nucleotide metabolism	N
R02868	dATP:D-hexose 6-phosphotransferase	C00131[c] + C00794[c] --> C00206[c] + C01096[c]	(pvm:113813437) or (pvm:113813438)	pvm:113813437;pvm:113813438	rn00230	0	1000	0		2.7.1.1	Nucleotide metabolism	N
R02869	S-adenosylmethioninamine:spermidine 3-aminopropyltransferase	C01137[c] + C00315[c] <=> C00170[c] + C00750[c] + C00080[c]	(pvm:5333205) or (pvm:5333208)	pvm:5333205;pvm:5333208	rn00410	-1000	1000	0		2.5.1.22	Metabolism of other amino acids	Y
R02884	ATP:Caldesmon phosphotransferase (Ca2+/calmodulin-dependent)	C00002[c] + C00759[c] --> C00008[c] + C01022[c]	(pvm:113811368) or (pvm:113811370) or (pvm:113811380) or (pvm:113811381) or (pvm:113812443)	pvm:113811368;pvm:113811370;pvm:113811380;pvm:113811381;pvm:113812443	rn00230	0	1000	0		2.7.11.17	Nucleotide metabolism	N
R02892	4,5alpha-dihydrocortisone:NADP+ delta4-oxidoreductase	C03588[c] + C00006[c] --> C00762[c] + C00005[c] + C00080[c]	(pvm:113818992) or (pvm:113818994) or (pvm:113819003)	pvm:113818992;pvm:113818994;pvm:113819003	rn00480	0	1000	0		1.3.1.22	Metabolism of other amino acids	N
R02894	D-Proline:oxygen oxidoreductase	C00763[c] + C00007[c] --> C03564[c] + C00027[c]	(pvm:113818896)	pvm:113818896	rn00330	0	1000	0		1.4.3.3	Amino acid metabolism	N
R02902		C00777[c] + C00167[c] --> C11061[c] + C00015[c]	(pvm:113823738) or (pvm:113823745) or (pvm:113823747) or (pvm:113823748) or (pvm:113823750) or (pvm:113823750) or (pvm:113823785) or (pvm:113823789) or (pvm:113823789) or (pvm:113823792) or (pvm:113823795)	pvm:113823738;pvm:113823745;pvm:113823747;pvm:113823748;pvm:113823750;pvm:113823750;pvm:113823785;pvm:113823789;pvm:113823789;pvm:113823792;pvm:113823795	rn00830	0	1000	0		2.4.1.17	Metabolism of cofactors and vitamins	N
R02908	5-Hydroxytryptamine:oxygen oxidoreductase(deaminating)(flavin-containing)	C00780[c] + C00001[c] + C00007[c] --> C05634[c] + C00014[c] + C00027[c]	(pvm:113818908)	pvm:113818908	rn00380	0	1000	0		1.4.3.4	Amino acid metabolism	N
R02917	S-Adenosyl-L-methionine:tRNA (guanosine-2'-O-)-methyltransferase	C00019[c] + C01977[c] --> C00021[c] + C04545[c]	(pvm:113801894)	pvm:113801894	rn00261	0	1000	0		2.1.1.34	Biosynthesis of other secondary metabolites	N
R02918	L-Tyrosine:tRNA(Tyr) ligase (AMP-forming)	C00002[c] + C00082[c] + C00787[c] --> C00020[c] + C00013[c] + C02839[c]	(pvm:113812351) or (pvm:113815921)	pvm:113812351;pvm:113815921	rn00970	0	1000	0		6.1.1.1	Aminoacyl-tRNA biosynthesis	N
R02919	4-[(1R)-1-Hydroxy-2-(methylamino)ethyl]-1,2-benzenediol:oxygen oxidoreductase(deaminating)(flavin-containing)	C00788[c] + C00001[c] + C00007[c] --> C05577[c] + C00218[c] + C00027[c]	(pvm:113818908)	pvm:113818908	rn00350	0	1000	0		1.4.3.4	Amino acid metabolism	N
R02921	CTP:D-ribitol-5-phosphate cytidylyltransferase	C00063[c] + C01068[c] <=> C00013[c] + C00789[c]	(pvm:113829108)	pvm:113829108	rn00040	-1000	1000	0		2.7.7.40	Carbohydrate metabolism	Y
R02923	D-Arginine:oxygen oxidoreductase (deaminating)	C00792[c] + C00001[c] + C00007[c] --> C03771[c] + C00014[c] + C00027[c]	(pvm:113818896)	pvm:113818896	rn00472	0	1000	0		1.4.3.3	Metabolism of other amino acids	N
R02940	2-Propyn-1-al:NAD+ oxidoreductase	C05985[c] + C00003[c] + C00001[c] --> C00804[c] + C00004[c] + C00080[c]	(pvm:113825010) or (pvm:113825013) or (pvm:113826103) or (pvm:113826145) or (pvm:113826151) or (pvm:113826159) or (pvm:113826162) or (pvm:113816548)	pvm:113825010;pvm:113825013;pvm:113826103;pvm:113826145;pvm:113826151;pvm:113826159;pvm:113826162;pvm:113816548	rn01100	0	1000	0		1.2.1.3	Global and overview maps	N
R02950	4-Coumarate:oxygen oxidoreductase	C00811[c] + C00007[c] + C01197[c] --> C01197[c] + C00001[c] + C16828[c]	(pvm:113813169)	pvm:113813169	rn00130	0	1000	0		1.14.18.1	Metabolism of cofactors and vitamins	N
R02953	S-alkyl-L-cysteine alkylthiol-lyase (deaminating)	C02749[c] + C00001[c] --> C00812[c] + C00014[c] + C00022[c]	(pvm:113829381)	pvm:113829381	rn00010	0	1000	0		4.4.1.13	Carbohydrate metabolism	N
R02957	D-Glucuronolactone:NAD+ oxidoreductase	C02670[c] + C00003[c] + 2 C00001[c] <=> C00818[c] + C00004[c] + C00080[c]	(pvm:113825010) or (pvm:113825013) or (pvm:113826103) or (pvm:113826145) or (pvm:113826151) or (pvm:113826159) or (pvm:113826162) or (pvm:113816548)	pvm:113825010;pvm:113825013;pvm:113826103;pvm:113826145;pvm:113826151;pvm:113826159;pvm:113826162;pvm:113816548	rn00053	-1000	1000	0		1.2.1.3	Carbohydrate metabolism	Y
R02961		C00019[c] + C00821[c] --> C00021[c] + C03391[c]	(pvm:113819409)	pvm:113819409	rn00261	0	1000	0		2.1.1.72	Biosynthesis of other secondary metabolites	N
R02973	(R)-pantetheine amidohydrolase	C00831[c] + C00001[c] --> C00864[c] + C01678[c]	(pvm:113806524) or (pvm:113806269)	pvm:113806524;pvm:113806269	rn00770	0	1000	0		3.5.1.92	Metabolism of cofactors and vitamins	N
R02976	ATP:sphinganine 1-phosphotransferase	C00002[c] + C00836[c] --> C00008[c] + C01120[c]	(pvm:113808336)	pvm:113808336	rn00600	0	1000	0		2.7.1.91	Lipid metabolism	N
R02978	Sphinganine:NADP+ 3-oxidoreductase	C00836[c] + C00006[c] --> C02934[c] + C00005[c] + C00080[c]	(pvm:113803090)	pvm:113803090	rn00600	0	1000	0		1.1.1.102	Lipid metabolism	N
R02984	dTDPglucose 4-epimerase	C00842[c] <=> C02097[c]	(pvm:113817626) or (pvm:113817632) or (pvm:113818729) or (pvm:113819959)	pvm:113817626;pvm:113817632;pvm:113818729;pvm:113819959	rn00521	-1000	1000	0		5.1.3.2	Biosynthesis of other secondary metabolites	Y
R03018	ATP:pantothenate 4'-phosphotransferase	C00002[c] + C00864[c] --> C00008[c] + C03492[c]	(pvm:113802613)	pvm:113802613	rn00770	0	1000	0		2.7.1.33	Metabolism of cofactors and vitamins	N
R03020	tRNA-uridine uracilmutase	C00868[c] <=> C02764[c]	(pvm:113822923)	pvm:113822923	rn01100	-1000	1000	0		5.4.99.12	Global and overview maps	Y
R03026	(S)-3-hydroxybutanoyl-CoA hydro-lyase	C01144[c] <=> C00877[c] + C00001[c]	(pvm:113813772) or (pvm:113813772)	pvm:113813772;pvm:113813772	rn00071	-1000	1000	0		4.2.1.17	Lipid metabolism	Y
R03035	ATP:pantetheine-4'-phosphate adenylyltransferase	C00002[c] + C01134[c] <=> C00013[c] + C00882[c]	(pvm:113828044)	pvm:113828044	rn00770	-1000	1000	0		2.7.7.3	Metabolism of cofactors and vitamins	Y
R03036	Dephospho-CoA nucleotidohydrolase	C00882[c] + C00001[c] <=> C01134[c] + C00020[c]	(pvm:113813587) or (pvm:113814754) or (pvm:113819647) or (pvm:113819647)	pvm:113813587;pvm:113814754;pvm:113819647;pvm:113819647	rn00770	-1000	1000	0		3.6.1.9	Metabolism of cofactors and vitamins	Y
R03038	L-Alanine:tRNA(Ala) ligase (AMP-forming)	C00002[c] + C00041[c] + C01635[c] --> C00020[c] + C00013[c] + C00886[c]	(pvm:113805602) or (pvm:113807935)	pvm:113805602;pvm:113807935	rn00970	0	1000	0		6.1.1.7	Aminoacyl-tRNA biosynthesis	N
R03055	(R)-5,6-dihydrothymine amidohydrolase	C21028[c] + C00001[c] <=> C21029[c]	(pvm:113807691)	pvm:113807691	rn00240	-1000	1000	0		3.5.2.2	Nucleotide metabolism	Y
R03057	(7E,9E,11Z,14Z)-(5S,6S)-5,6-Epoxyicosa-7,9,11,14-tetraenoate hydrolase	C00909[c] + C00001[c] --> C02165[c]	(pvm:113829063)	pvm:113829063	rn00590	0	1000	0		3.3.2.6	Lipid metabolism	N
R03058	arachidonate:oxygen 5-oxidoreductase	C05356[c] --> C00909[c] + C00001[c]	(pvm:113809704)	pvm:113809704	rn00590	0	1000	0		1.13.11.34	Lipid metabolism	N
R03088		C00951[c] + C00080[c] + C00007[c] + C00004[c] --> C05301[c] + C00003[c] + C00001[c]	(pvm:113829697) or (pvm:113801218) or (pvm:113802729) or (pvm:113802766) or (pvm:113803893) or (pvm:113803906) or (pvm:113803903) or (pvm:113803928) or (pvm:113805029) or (pvm:113805029) or (pvm:113805053)	pvm:113829697;pvm:113801218;pvm:113802729;pvm:113802766;pvm:113803893;pvm:113803906;pvm:113803903;pvm:113803928;pvm:113805029;pvm:113805029;pvm:113805053	rn00140	0	1000	0		1.14.14.1	Lipid metabolism	N
R03089		C00951[c] + C00080[c] + C00007[c] + C00005[c] --> C05141[c] + C00006[c] + C00001[c]	(pvm:113829697) or (pvm:113801218) or (pvm:113802729) or (pvm:113802766) or (pvm:113803893) or (pvm:113803906) or (pvm:113803903) or (pvm:113803928) or (pvm:113805029) or (pvm:113805029) or (pvm:113805053)	pvm:113829697;pvm:113801218;pvm:113802729;pvm:113802766;pvm:113803893;pvm:113803906;pvm:113803903;pvm:113803928;pvm:113805029;pvm:113805029;pvm:113805053	rn00140	0	1000	0		1.14.14.1	Lipid metabolism	N
R03090		C00951[c] + C00080[c] + C00007[c] + C00005[c] --> C05301[c] + C00006[c] + C00001[c]	(pvm:113829697) or (pvm:113801218) or (pvm:113802729) or (pvm:113802766) or (pvm:113803893) or (pvm:113803906) or (pvm:113803903) or (pvm:113803928) or (pvm:113805029) or (pvm:113805029) or (pvm:113805053)	pvm:113829697;pvm:113801218;pvm:113802729;pvm:113802766;pvm:113803893;pvm:113803906;pvm:113803903;pvm:113803928;pvm:113805029;pvm:113805029;pvm:113805053	rn00140	0	1000	0		1.14.14.1	Lipid metabolism	N
R03091	UDPglucuronate beta-D-glucuronosyltransferase(acceptor-unspecific)	C00951[c] + C00167[c] --> C05503[c] + C00015[c]	(pvm:113823738) or (pvm:113823745) or (pvm:113823747) or (pvm:113823748) or (pvm:113823750) or (pvm:113823750) or (pvm:113823785) or (pvm:113823789) or (pvm:113823789) or (pvm:113823792) or (pvm:113823795)	pvm:113823738;pvm:113823745;pvm:113823747;pvm:113823748;pvm:113823750;pvm:113823750;pvm:113823785;pvm:113823789;pvm:113823789;pvm:113823792;pvm:113823795	rn00140	0	1000	0		2.4.1.17	Lipid metabolism	N
R03102	L-2-aminoadipate-6-semialdehyde:NAD+ 6-oxidoreductase	C04076[c] + C00003[c] + C00001[c] --> C00956[c] + C00004[c] + C00080[c]	(pvm:113816547)	pvm:113816547	rn00310	0	1000	0		1.2.1.31	Amino acid metabolism	N
R03103	L-2-aminoadipate-6-semialdehyde:NADP+ 6-oxidoreductase	C04076[c] + C00006[c] + C00001[c] --> C00956[c] + C00005[c] + C00080[c]	(pvm:113816547)	pvm:113816547	rn00310	0	1000	0		1.2.1.31	Amino acid metabolism	N
R03104	3-Mercaptolactate:NAD+ oxidoreductase	C05823[c] + C00003[c] --> C00957[c] + C00004[c] + C00080[c]	(pvm:113805256)	pvm:113805256	rn00270	0	1000	0		1.1.1.27	Amino acid metabolism	N
R03107	Plasmenylcholine 2-acylhydrolase	C00958[c] + C00001[c] --> C04517[c] + C00162[c]	(pvm:113800992) or (pvm:113800996) or (pvm:113801002) or (pvm:113801003) or (pvm:113801004) or (pvm:113801005) or (pvm:113801006)	pvm:113800992;pvm:113800996;pvm:113801002;pvm:113801003;pvm:113801004;pvm:113801005;pvm:113801006	rn00565	0	1000	0		3.1.1.4	Lipid metabolism	N
R03150	ATP:myosin-light-chain O-phosphotransferase	C00002[c] + C01003[c] --> C00008[c] + C03875[c]	(pvm:113812444)	pvm:113812444	rn00230	0	1000	0		2.7.11.18	Nucleotide metabolism	N
R03158		C01013[c] + C00010[c] <=> C05668[c] + C00001[c]	(pvm:113800812) or (pvm:113800830)	pvm:113800812;pvm:113800830	rn00410	-1000	1000	0		3.1.2.4	Metabolism of other amino acids	Y
R03161	ATP:6-deoxy-L-galactose 1-phosphotransferase	C00002[c] + C01019[c] --> C00008[c] + C02985[c]	(pvm:113803762)	pvm:113803762	rn00051	0	1000	0		2.7.1.52	Carbohydrate metabolism	N
R03162	alpha-L-fucoside fucohydrolase	C02475[c] + C00001[c] --> C00069[c] + C01019[c]	(pvm:113828909) or (pvm:113828908) or (pvm:113828917) or (pvm:113823293) or (pvm:113823296) or (pvm:113823303)	pvm:113828909;pvm:113828908;pvm:113828917;pvm:113823293;pvm:113823296;pvm:113823303	rn01100	0	1000	0		3.2.1.51	Global and overview maps	N
R03165	Hydroxymethylbilane hydro-lyase(cyclizing)	C01024[c] --> C01051[c] + C00001[c]	(pvm:113826776)	pvm:113826776	rn00860	0	1000	0		4.2.1.75	Metabolism of cofactors and vitamins	N
R03167	glutathione:lipid-hydroperoxide oxidoreductase	C01025[c] + 2 C00051[c] --> C01356[c] + C00127[c] + 2 C00001[c]	(pvm:113801176)	pvm:113801176	rn00480	0	1000	0		1.11.1.12	Metabolism of other amino acids	N
R03173	2-Methylbutanoyl-CoA:(acceptor) oxidoreductase	C01033[c] + C00028[c] --> C03345[c] + C00030[c]	(pvm:113829565)	pvm:113829565	rn00280	0	1000	0		1.3.99.12	Amino acid metabolism	N
R03174	(S)-2-methylbutanoyl-CoA:enzyme N6-(dihydrolipoyl)lysine S-(2-methylbutanoyl)transferase	C15980[c] + C15973[c] --> C00010[c] + C15979[c]	(pvm:113825174)	pvm:113825174	rn00280	0	1000	0		2.3.1.168	Amino acid metabolism	N
R03176	3beta-Hydroxy-delta5-steroid:NAD+ 3-oxidoreductase	C03836[c] + C00003[c] --> C01034[c] + C00004[c] + C00080[c]	(pvm:113823950)	pvm:113823950	rn00730	0	1000	0		1.1.1.145	Metabolism of cofactors and vitamins	N
R03181	4-Maleylacetoacetate cis-trans-isomerase	C01036[c] --> C01061[c]	(pvm:113819999)	pvm:113819999	rn00350	0	1000	0		5.2.1.2	Amino acid metabolism	N
R03189	5-Formyltetrahydrofolate:L-glutamate N-formiminotransferase	C03479[c] + C00025[c] --> C00101[c] + C01045[c]	(pvm:113821713)	pvm:113821713	rn00670	0	1000	0		2.1.2.5	Metabolism of cofactors and vitamins	N
R03197	Uroporphyrinogen-III carboxy-lyase	C01051[c] --> C03263[c] + 4 C00011[c]	(pvm:113815290)	pvm:113815290	rn00860	0	1000	0		4.1.1.37	Metabolism of cofactors and vitamins	N
R03218	Procollagen-L-proline,2-oxoglutarate:oxygen oxidoreductase (3-hydroxylating)	C01078[c] + C00026[c] + C00007[c] --> C04397[c] + C00042[c] + C00011[c]	(pvm:113828572)	pvm:113828572	rn01100	0	1000	0		1.14.11.7	Global and overview maps	N
R03219	Procollagen-L-proline,2-oxoglutarate:oxygen oxidoreductase (4-hydroxylating)	C01078[c] + C00026[c] + C00007[c] --> C04398[c] + C00042[c] + C00011[c]	(pvm:113821642) or (pvm:113821646) or (pvm:113821654) or (pvm:113821654) or (pvm:113821659) or (pvm:113821659) or (pvm:113821671) or (pvm:113821674) or (pvm:113822868)	pvm:113821642;pvm:113821646;pvm:113821654;pvm:113821654;pvm:113821659;pvm:113821659;pvm:113821671;pvm:113821674;pvm:113822868	rn01100	0	1000	0		1.14.11.2	Global and overview maps	N
R03220	Coproporphyrinogen:oxygen oxidoreductase(decarboxylating)	C03263[c] + C00007[c] --> C01079[c] + 2 C00011[c] + 2 C00001[c]	(pvm:113823676)	pvm:113823676	rn00860	0	1000	0		1.3.3.3	Metabolism of cofactors and vitamins	N
R03222	protoporphyrinogen-IX:oxygen oxidoreductase	C01079[c] + 3 C00007[c] --> C02191[c] + 3 C00027[c]	(pvm:113823683)	pvm:113823683	rn00860	0	1000	0		1.3.3.4	Metabolism of cofactors and vitamins	N
R03224	(3R)-3-Hydroxyacyl-CoA hydro-lyase	C01086[c] --> C01122[c] + C00001[c]	(pvm:113813772) or (pvm:113813772)	pvm:113813772;pvm:113813772	rn01100	0	1000	0		4.2.1.17	Global and overview maps	N
R03225	(S)-3-Hydroxybutanoate:2-oxoglutarate oxidoreductase	C03197[c] + C00026[c] --> C00164[c] + C01087[c]	(pvm:113800062) or (pvm:113800061)	pvm:113800062;pvm:113800061	rn00020	0	1000	0		1.1.99.24	Carbohydrate metabolism	N
R03237	CTP:D-tagatose 6-phosphate 1-phosphotransferase	C00063[c] + C01097[c] <=> C00112[c] + C03785[c]	(pvm:113815914) or (pvm:113815919)	pvm:113815914;pvm:113815919	rn00052	-1000	1000	0		2.7.1.11	Carbohydrate metabolism	Y
R03238	UTP:D-tagatose 6-phosphate 1-phosphotransferase	C00075[c] + C01097[c] <=> C00015[c] + C03785[c]	(pvm:113815914) or (pvm:113815919)	pvm:113815914;pvm:113815919	rn00052	-1000	1000	0		2.7.1.11	Carbohydrate metabolism	Y
R03239	ITP:D-tagatose 6-phosphate 1-phosphotransferase	C00081[c] + C01097[c] <=> C00104[c] + C03785[c]	(pvm:113815914) or (pvm:113815919)	pvm:113815914;pvm:113815919	rn00052	-1000	1000	0		2.7.1.11	Carbohydrate metabolism	Y
R03259	3',5'-Cyclic-nucleotide 5'-nucleotidohydrolase	C04212[c] + C00001[c] --> C01117[c]	(pvm:113823440) or (pvm:113823443) or (pvm:113823448) or (pvm:113823456) or (pvm:113823457)	pvm:113823440;pvm:113823443;pvm:113823448;pvm:113823456;pvm:113823457	rn01100	0	1000	0		3.1.4.17	Global and overview maps	N
R03269	N-[(R)-4'-Phosphopantothenoyl]-L-cysteine carboxy-lyase	C04352[c] --> C01134[c] + C00011[c]	(pvm:113815289)	pvm:113815289	rn00770	0	1000	0		4.1.1.36	Metabolism of cofactors and vitamins	N
R03270		C05125[c] + C15972[c] --> C16255[c] + C00068[c]	(pvm:113817772) or (pvm:113817781) or (pvm:113815366)	pvm:113817772;pvm:113817781;pvm:113815366	rn00010	0	1000	0		1.2.4.1	Carbohydrate metabolism	N
R03274	ATP:beta-adrenergic-receptor phosphotransferase	C00002[c] + C01141[c] --> C00008[c] + C04141[c]	(pvm:113811350)	pvm:113811350	rn00230	0	1000	0		2.7.11.15	Nucleotide metabolism	N
R03291	trans-4-Hydroxy-L-proline:NAD+ 5-oxidoreductase	C01157[c] + C00003[c] --> C04281[c] + C00004[c] + C00080[c]	(pvm:113820086) or (pvm:113820089)	pvm:113820086;pvm:113820089	rn00330	0	1000	0		1.5.1.2	Amino acid metabolism	N
R03293	trans-4-Hydroxy-L-proline:NADP+ 5-oxidoreductase	C01157[c] + C00006[c] --> C04281[c] + C00005[c] + C00080[c]	(pvm:113820086) or (pvm:113820089)	pvm:113820086;pvm:113820089	rn00330	0	1000	0		1.5.1.2	Amino acid metabolism	N
R03295	trans-4-hydroxy-L-proline:quinone oxidoreductase	C01157[c] + C15602[c] --> C04281[c] + C15603[c]	(pvm:113829252)	pvm:113829252	rn00330	0	1000	0		1.5.5.3	Amino acid metabolism	N
R03313	L-glutamate-5-semialdehyde:NADP+ 5-oxidoreductase (phosphorylating)	C01165[c] + C00009[c] + C00006[c] --> C03287[c] + C00005[c] + C00080[c]	(pvm:113816604)	pvm:113816604	rn00330	0	1000	0		1.2.1.41	Amino acid metabolism	N
R03315	ATP:pseudouridine 5'-phosphotransferase	C00002[c] + C02067[c] --> C00008[c] + C01168[c]	(pvm:113808316) or (pvm:113808329)	pvm:113808316;pvm:113808329	rn00240	0	1000	0		2.7.1.83	Nucleotide metabolism	N
R03316		C05381[c] + C15972[c] --> C16254[c] + C00068[c]	(pvm:113815367) or (pvm:113815379)	pvm:113815367;pvm:113815379	rn00020	0	1000	0		1.2.4.2	Carbohydrate metabolism	N
R03319	alpha-D-Hexose 1-phosphate 1,6-phosphomutase	C01171[c] <=> C03735[c]	(pvm:113826315) or (pvm:113826321) or (pvm:113805335) or (pvm:113814599)	pvm:113826315;pvm:113826321;pvm:113805335;pvm:113814599	rn01100	-1000	1000	0		5.4.2.2	Global and overview maps	Y
R03321	beta-D-Glucose 6-phosphate ketol-isomerase	C01172[c] <=> C05345[c]	(pvm:113813181)	pvm:113813181	rn00010	-1000	1000	0		5.3.1.9	Carbohydrate metabolism	Y
R03330	D-myo-Inositol-1,3-bisphosphate 3-phosphohydrolase	C04062[c] + C00001[c] --> C01177[c] + C00009[c]	(pvm:113815009) or (pvm:113815008) or (pvm:113816260) or (pvm:113816277)	pvm:113815009;pvm:113815008;pvm:113816260;pvm:113816277	rn00562	0	1000	0		3.1.3.64	Carbohydrate metabolism	N
R03342	3-(4-Hydroxyphenyl)pyruvate keto-enol-isomerase	C01179[c] <=> C05350[c]	(pvm:113814324) or (pvm:113814324)	pvm:113814324;pvm:113814324	rn00350	-1000	1000	0		5.3.2.1	Amino acid metabolism	Y
R03347	ATP:beta-D-ribosylnicotinate 5-phosphotransferase	C01185[c] + C00008[c] --> C05841[c] + C00002[c]	(pvm:113802472) or (pvm:113802497)	pvm:113802472;pvm:113802497	rn00760	0	1000	0		2.7.1.173	Metabolism of cofactors and vitamins	N
R03352	3-Hydroxy-2-methylpropanoyl-CoA hydrolase	C04047[c] + C00001[c] --> C01188[c] + C00010[c]	(pvm:113800812) or (pvm:113800830)	pvm:113800812;pvm:113800830	rn01100	0	1000	0		3.1.2.4	Global and overview maps	N
R03355	beta-D-Galactosyl-1,4-beta-D-glucosylceramide galactohydrolase	C01290[c] + C00001[c] --> C01190[c] + C00124[c]	(pvm:113823164)	pvm:113823164	rn00600	0	1000	0		3.2.1.23	Lipid metabolism	N
R03361	ATP:1-Phosphatidyl-1D-myo-inositol 4-phosphotransferase	C00002[c] + C01194[c] --> C00008[c] + C01277[c]	(pvm:113804891) or (pvm:113805976) or (pvm:113805992)	pvm:113804891;pvm:113805976;pvm:113805992	rn00562	0	1000	0		2.7.1.67	Carbohydrate metabolism	N
R03376	[procollagen]-L-lysine,2-oxoglutarate:oxygen oxidoreductase (5-hydroxylating)	C02188[c] + C00026[c] + C00007[c] --> C01211[c] + C00042[c] + C00011[c]	(pvm:113823999)	pvm:113823999	rn00310	0	1000	0		1.14.11.4	Amino acid metabolism	N
R03378	GTP:5-hydroxy-L-lysine O-phosphotransferase	C00044[c] + C16741[c] --> C00035[c] + C03366[c]	(pvm:113807145)	pvm:113807145	rn00310	0	1000	0		2.7.1.81	Amino acid metabolism	N
R03380	UDP-alpha-D-galactose:procollagen-5-hydroxy-L-lysine D-galactosyltransferase	C00052[c] + C01211[c] --> C00015[c] + C04487[c]	(pvm:113829295)	pvm:113829295	rn00310	0	1000	0		2.4.1.50	Amino acid metabolism	N
R03393	D-myo-Inositol-1,4-bisphosphate 1-phosphohydrolase	C01220[c] + C00001[c] --> C03546[c] + C00009[c]	(pvm:113812677)	pvm:113812677	rn00562	0	1000	0		3.1.3.57	Carbohydrate metabolism	N
R03394	D-myo-Inositol-1,4,5-trisphosphate 5-phosphohydrolase	C01245[c] + C00001[c] --> C01220[c] + C00009[c]	(pvm:113811538)	pvm:113811538	rn00562	0	1000	0		3.1.3.56	Carbohydrate metabolism	N
R03416	1-Acyl-sn-glycero-3-phosphoethanolamine aldehydohydrolase	C04438[c] + C00001[c] --> C00162[c] + C01233[c]	(pvm:113802580) or (pvm:113803646) or (pvm:113803653) or (pvm:113803690)	pvm:113802580;pvm:113803646;pvm:113803653;pvm:113803690	rn00564	0	1000	0		3.1.1.5	Lipid metabolism	N
R03417	L-2-Lysophosphatidylethanolamine aldehydohydrolase	C05973[c] + C00001[c] --> C00162[c] + C01233[c]	(pvm:113802580) or (pvm:113803646) or (pvm:113803653) or (pvm:113803690)	pvm:113802580;pvm:113803646;pvm:113803653;pvm:113803690	rn00564	0	1000	0		3.1.1.5	Lipid metabolism	N
R03421	N4-(beta-N-Acetyl-D-glucosaminyl)-L-asparagine amidohydrolase	C04540[c] + C00001[c] --> C01239[c] + C00049[c]	(pvm:113826345) or (pvm:113826345)	pvm:113826345;pvm:113826345	rn00220	0	1000	0		3.5.1.26	Amino acid metabolism	N
R03425	glycine:lipoylprotein oxidoreductase (decarboxylating and acceptor-aminomethylating)	C00037[c] + C02051[c] --> C01242[c] + C00011[c]	(pvm:113820072)	pvm:113820072	rn00260	0	1000	0		1.4.4.2	Amino acid metabolism	N
R03427	D-myo-Inositol 1,3,4-trisphosphate 1-phosphohydrolase	C01243[c] + C00001[c] --> C04063[c] + C00009[c]	(pvm:113812677)	pvm:113812677	rn00562	0	1000	0		3.1.3.57	Carbohydrate metabolism	N
R03428	ATP:1D-myo-inositol-1,3,4-trisphosphate 5-phosphotransferase	C00002[c] + C01243[c] --> C00008[c] + C01272[c]	(pvm:113820662)	pvm:113820662	rn00562	0	1000	0		2.7.1.159	Carbohydrate metabolism	N
R03429	ATP:1D-myo-inositol-1,3,4-trisphosphate 6-phosphotransferase	C00002[c] + C01243[c] --> C00008[c] + C04477[c]	(pvm:113820662)	pvm:113820662	rn00562	0	1000	0		2.7.1.159	Carbohydrate metabolism	N
R03430	D-myo-Inositol 1,3,4,5-tetrakisphosphate 5-phosphohydrolase	C01272[c] + C00001[c] --> C01243[c] + C00009[c]	(pvm:113811538)	pvm:113811538	rn00562	0	1000	0		3.1.3.56	Carbohydrate metabolism	N
R03433	ATP:1D-myo-inositol-1,4,5-trisphosphate 3-phosphotransferase	C00002[c] + C01245[c] --> C00008[c] + C01272[c]	(pvm:113815919) or (pvm:113815919) or (pvm:113817163) or (pvm:113817177)	pvm:113815919;pvm:113815919;pvm:113817163;pvm:113817177	rn00562	0	1000	0		2.7.1.127	Carbohydrate metabolism	N
R03434	D-myo-Inositol 1,3,4,5-tetrakisphosphate 3-phosphohydrolase	C01272[c] + C00001[c] --> C01245[c] + C00009[c]	(pvm:113812681) or (pvm:113812701) or (pvm:113812701) or (pvm:113813801) or (pvm:113814985) or (pvm:113815005) or (pvm:113815006)	pvm:113812681;pvm:113812701;pvm:113812701;pvm:113813801;pvm:113814985;pvm:113815005;pvm:113815006	rn00562	0	1000	0		3.1.3.62	Carbohydrate metabolism	N
R03435	1-Phosphatidyl-1D-myo-inositol-4,5-bisphosphate inositoltrisphosphohydrolase	C04637[c] + C00001[c] --> C01245[c] + C00641[c]	(pvm:113821042) or (pvm:113821045) or (pvm:113821046) or (pvm:113821051) or (pvm:113821065)	pvm:113821042;pvm:113821045;pvm:113821046;pvm:113821051;pvm:113821065	rn00562	0	1000	0		3.1.4.11	Carbohydrate metabolism	N
R03437	Acetyl-CoA:1-alkyl-sn-glycero-3-phosphocholine 2-O-acetyltransferase	C00024[c] + C04317[c] --> C00010[c] + C04598[c]	(pvm:113826359)	pvm:113826359	rn00565	0	1000	0		2.3.1.67	Lipid metabolism	N
R03450	[Pyruvate dehydrogenase (lipoamide)]-phosphate phosphohydrolase	C01293[c] + C00001[c] --> C01256[c] + C00009[c]	(pvm:113806787)	pvm:113806787	rn01100	0	1000	0		3.1.3.43	Global and overview maps	N
R03451	N6,N6,N6-Trimethyl-L-lysine,2-oxoglutarate:oxygen oxidoreductase (3-hydroxylating)	C03793[c] + C00026[c] + C00007[c] + C00080[c] --> C01259[c] + C00042[c] + C00011[c]	(pvm:113828573)	pvm:113828573	rn00310	0	1000	0		1.14.11.8	Amino acid metabolism	N
R03469	ATP:1-phosphatidyl-1D-myo-inositol-4-phosphate 5-phosphotransferase	C00002[c] + C01277[c] --> C00008[c] + C04637[c]	(pvm:113805993) or (pvm:113806002)	pvm:113805993;pvm:113806002	rn00562	0	1000	0		2.7.1.68	Carbohydrate metabolism	N
R03479	ATP:1D-myo-inositol-3,4,5,6-tetrakisphosphate 1-phosphotransferase	C00002[c] + C04520[c] <=> C00008[c] + C01284[c]	(pvm:113817185)	pvm:113817185	rn00562	-1000	1000	0		2.7.1.134	Carbohydrate metabolism	Y
R03482	N-Acetyl-D-glucosaminylphosphatidylinositol acetyhydrolase	C01288[c] + C00001[c] --> C04248[c] + C00033[c]	(pvm:113805444)	pvm:113805444	rn01100	0	1000	0		3.5.1.89	Global and overview maps	N
R03486	UDP-alpha-D-galactose:beta-D-galactosyl-(1->4)-D-glucosyl-(1<->1)-ceramide 4II-alpha-D-galactosyltransferase	C00052[c] + C01290[c] --> C00015[c] + C04737[c]	(pvm:113830596) or (pvm:113830619) or (pvm:113800507) or (pvm:113800518) or (pvm:113800518) or (pvm:113800521) or (pvm:113800528) or (pvm:113800540) or (pvm:113800548) or (pvm:113800549)	pvm:113830596;pvm:113830619;pvm:113800507;pvm:113800518;pvm:113800518;pvm:113800521;pvm:113800528;pvm:113800540;pvm:113800548;pvm:113800549	rn01100	0	1000	0		2.4.1.228	Global and overview maps	N
R03492	beta-D-Galactosyl-1,4-beta-D-glucosylceramide N-acetylhexosaminohydrolase	C06135[c] + C00001[c] --> C01290[c] + C01132[c]	(pvm:113823303) or (pvm:113823305) or (pvm:113823305) or (pvm:113823306) or (pvm:113823306) or (pvm:113823307) or (pvm:113823307) or (pvm:113823330) or (pvm:113823358) or (pvm:113824451) or (pvm:113824467)	pvm:113823303;pvm:113823305;pvm:113823305;pvm:113823306;pvm:113823306;pvm:113823307;pvm:113823307;pvm:113823330;pvm:113823358;pvm:113824451;pvm:113824467	rn00052	0	1000	0		3.2.1.52	Carbohydrate metabolism	N
R03511	phylloquinone:oxidized-dithiothreitol oxidoreductase	C02059[c] + C01119[c] + C00001[c] --> C05849[c] + C00265[c]	(pvm:113821554)	pvm:113821554	rn00130	0	1000	0		1.17.4.4	Metabolism of cofactors and vitamins	N
R03513	UDP-N-acetyl-D-glucosamine:O-glycosyl-glycoprotein (N-acetyl-D-glucosamine to N-acetyl-D-galactosaminyl-R) beta-1,3-N-acetyl-D-glucosaminyltransferase	C00043[c] + C04387[c] --> C00015[c] + C01306[c]	(pvm:113822635)	pvm:113822635	rn00240	0	1000	0		2.4.1.147	Nucleotide metabolism	N
R03516	ATP:[3-methyl-2-oxobutanoate dehydrogenase (lipoamide)] phosphotransferase	C00002[c] + C04726[c] --> C00008[c] + C01308[c]	(pvm:113816223)	pvm:113816223	rn00230	0	1000	0		2.7.11.4	Nucleotide metabolism	N
R03522	RX:glutathione R-transferase	C01322[c] + C00051[c] --> C00462[c] + C02320[c]	(pvm:113825341) or (pvm:113825373) or (pvm:113825371) or (pvm:113826467) or (pvm:113826491) or (pvm:113826502) or (pvm:113827639) or (pvm:113827639) or (pvm:113827638) or (pvm:113827647) or (pvm:113827664) or (pvm:113827708) or (pvm:113827712) or (pvm:113827714) or (pvm:113828804) or (pvm:113828804) or (pvm:113828822) or (pvm:113829890) or (pvm:113829896) or (pvm:113829903) or (pvm:113829904) or …	pvm:113825341;pvm:113825373;pvm:113825371;pvm:113826467;pvm:113826491;pvm:113826502;pvm:113827639;pvm:113827639;pvm:113827638;pvm:113827647;pvm:113827664;pvm:113827708;pvm:113827712;pvm:113827714;pvm:113828804;pvm:113828804;pvm:113828822;pvm:113829890;pvm:113829896;pvm:113829903;pvm:113829904;pvm:113829943;pvm:113829946	rn00480	0	1000	0		2.5.1.18	Metabolism of other amino acids	N
R03528	L-cysteine-S-conjugate aryl-thiol-lyase (deaminating; pyruvate-forming)	C02882[c] + C00001[c] --> C01336[c] + C00014[c] + C00022[c]	(pvm:113829381)	pvm:113829381	rn00010	0	1000	0		4.4.1.13	Carbohydrate metabolism	N
R03530	ATP:dIDP phosphotransferase	C00002[c] + C01344[c] <=> C00008[c] + C01345[c]	(pvm:113821087) or (pvm:113821105) or (pvm:113821107)	pvm:113821087;pvm:113821105;pvm:113821107	rn00230	-1000	1000	0		2.7.4.6	Nucleotide metabolism	Y
R03552	Acetyl-CoA:histone acetyltransferase	C00024[c] + C02415[c] --> C00010[c] + C01997[c]	(pvm:113817004) or (pvm:113817009) or (pvm:113818076) or (pvm:113818097) or (pvm:113818131) or (pvm:113818131) or (pvm:113819227) or (pvm:113819229) or (pvm:113819277) or (pvm:113819302) or (pvm:113819303) or (pvm:113819303) or (pvm:113819304)	pvm:113817004;pvm:113817009;pvm:113818076;pvm:113818097;pvm:113818131;pvm:113818131;pvm:113819227;pvm:113819229;pvm:113819277;pvm:113819302;pvm:113819303;pvm:113819303;pvm:113819304	rn00010	0	1000	0		2.3.1.48	Carbohydrate metabolism	N
R03553	3'-Phosphoadenylylsulfate:keratan 6'-sulfotransferase	C00053[c] + C00573[c] --> C00054[c] + C00573[c]	(pvm:113825529)	pvm:113825529	rn01120	0	1000	0		2.8.2.21	Global and overview maps	N
R03557	Secondary alcohol:NADP+ oxidoreductase	C01612[c] + C00006[c] --> C01450[c] + C00005[c] + C00080[c]	(pvm:113816181) or (pvm:113822075) or (pvm:113802409)	pvm:113816181;pvm:113822075;pvm:113802409	rn00480	0	1000	0		1.1.1.184	Metabolism of other amino acids	N
R03595	ATP:selenide, water phosphotransferase	C00002[c] + C01528[c] + C00001[c] --> C00020[c] + C05172[c] + C00009[c]	(pvm:113819858) or (pvm:113820947)	pvm:113819858;pvm:113820947	rn00450	0	1000	0		2.7.9.3	Metabolism of other amino acids	N
R03596	hydrogen selenide:NADP+ oxidoreductase	C01528[c] + 3 C00006[c] + 3 C00001[c] --> C05684[c] + 3 C00005[c] + 5 C00080[c]	(pvm:113830545)	pvm:113830545	rn00450	0	1000	0		1.8.1.9	Metabolism of other amino acids	N
R03599	L-selenocysteine selenide-lyase (L-alanine-forming)	C05688[c] + C00030[c] --> C01528[c] + C00041[c] + C00028[c]	(pvm:113829384)	pvm:113829384	rn00450	0	1000	0		4.4.1.16	Metabolism of other amino acids	N
R03613	diphthine:ammonia ligase (AMP-forming)	C00002[c] + C01573[c] + C00014[c] + C00080[c] --> C00020[c] + C00013[c] + C02872[c]	(pvm:113825742)	pvm:113825742	rn01100	0	1000	0		6.3.1.14	Global and overview maps	N
R03629	melatonin,NADPH---hemoprotein reductase:oxygen oxidoreductase	C01598[c] + C03024[c] + C00007[c] --> C05643[c] + C03161[c] + C00001[c]	(pvm:113829697) or (pvm:113801218) or (pvm:113802729) or (pvm:113802766) or (pvm:113803893) or (pvm:113803906) or (pvm:113803903) or (pvm:113803928) or (pvm:113805029) or (pvm:113805029) or (pvm:113805053)	pvm:113829697;pvm:113801218;pvm:113802729;pvm:113802766;pvm:113803893;pvm:113803906;pvm:113803903;pvm:113803928;pvm:113805029;pvm:113805029;pvm:113805053	rn00380	0	1000	0		1.14.14.1	Amino acid metabolism	N
R03632	ATP:protamine O-phosphotransferase	C00002[c] + C01609[c] --> C00008[c] + C02729[c]	(pvm:113804714) or (pvm:113804731) or (pvm:113805822) or (pvm:113805822) or (pvm:113805833) or (pvm:113805853) or (pvm:113805876) or (pvm:113807020) or (pvm:113807041) or (pvm:113807043) or (pvm:113807048) or (pvm:113807049) or (pvm:113807057) or (pvm:113807059) or (pvm:113807059) or (pvm:113807067) or (pvm:113808173) or (pvm:113808174) or (pvm:113808205) or (pvm:113810366) or (pvm:113810372) or …	pvm:113804714;pvm:113804731;pvm:113805822;pvm:113805822;pvm:113805833;pvm:113805853;pvm:113805876;pvm:113807020;pvm:113807041;pvm:113807043;pvm:113807048;pvm:113807049;pvm:113807057;pvm:113807059;pvm:113807059;pvm:113807067;pvm:113808173;pvm:113808174;pvm:113808205;pvm:113810366;pvm:113810372;pvm:113810378;pvm:113811598;pvm:113811604;pvm:113811621;pvm:113811623;pvm:113811632;pvm:113812763;pvm:113…	rn00230	0	1000	0		2.7.11.1	Nucleotide metabolism	N
R03646	L-Arginine:tRNA(Arg) ligase (AMP-forming)	C00002[c] + C00062[c] + C01636[c] --> C00020[c] + C00013[c] + C02163[c]	(pvm:113800583) or (pvm:113805587)	pvm:113800583;pvm:113805587	rn00970	0	1000	0		6.1.1.19	Aminoacyl-tRNA biosynthesis	N
R03648	L-Asparagine:tRNA(Asn) ligase (AMP-forming)	C00002[c] + C00152[c] + C01637[c] --> C00020[c] + C00013[c] + C03402[c]	(pvm:113820784) or (pvm:113821989)	pvm:113820784;pvm:113821989	rn00970	0	1000	0		6.1.1.22	Aminoacyl-tRNA biosynthesis	N
R03650	L-Cysteine:tRNA(Cys) ligase (AMP-forming)	C00002[c] + C00097[c] + C01639[c] --> C00020[c] + C00013[c] + C03125[c]	(pvm:113823033) or (pvm:113823035)	pvm:113823033;pvm:113823035	rn00970	0	1000	0		6.1.1.16	Aminoacyl-tRNA biosynthesis	N
R03652	L-Glutamine:tRNA(Gln) ligase (AMP-forming)	C00002[c] + C00064[c] + C01640[c] --> C00020[c] + C00013[c] + C02282[c]	(pvm:5333216) or (pvm:5333211)	pvm:5333216;pvm:5333211	rn00970	0	1000	0		6.1.1.18	Aminoacyl-tRNA biosynthesis	N
R03654	glycine:tRNA(Gly) ligase (AMP-forming)	C00002[c] + C00037[c] + C01642[c] --> C00020[c] + C00013[c] + C02412[c]	(pvm:113802159) or (pvm:113817282)	pvm:113802159;pvm:113817282	rn00970	0	1000	0		6.1.1.14	Aminoacyl-tRNA biosynthesis	N
R03655	L-Histidine:tRNA(His) ligase (AMP-forming)	C00002[c] + C00135[c] + C01643[c] --> C00020[c] + C00013[c] + C02988[c]	(pvm:113819716)	pvm:113819716	rn00970	0	1000	0		6.1.1.21	Aminoacyl-tRNA biosynthesis	N
R03656	L-Isoleucine:tRNA(Ile) ligase (AMP-forming)	C00002[c] + C00407[c] + C01644[c] --> C00020[c] + C00013[c] + C03127[c]	(pvm:113805599) or (pvm:113805600) or (pvm:113805600)	pvm:113805599;pvm:113805600;pvm:113805600	rn00970	0	1000	0		6.1.1.5	Aminoacyl-tRNA biosynthesis	N
R03657	L-Leucine:tRNA(Leu) ligase (AMP-forming)	C00002[c] + C00123[c] + C01645[c] --> C00020[c] + C00013[c] + C02047[c]	(pvm:113803371) or (pvm:113805599)	pvm:113803371;pvm:113805599	rn00970	0	1000	0		6.1.1.4	Aminoacyl-tRNA biosynthesis	N
R03658	L-lysine:tRNALys ligase (AMP-forming)	C00002[c] + C00047[c] + C01646[c] --> C00020[c] + C00013[c] + C01931[c]	(pvm:113805602)	pvm:113805602	rn00970	0	1000	0		6.1.1.6	Aminoacyl-tRNA biosynthesis	N
R03659	L-Methionine:tRNAMet ligase (AMP-forming)	C00002[c] + C00073[c] + C01647[c] --> C00020[c] + C00013[c] + C02430[c]	(pvm:113815924) or (pvm:113819544)	pvm:113815924;pvm:113819544	rn00970	0	1000	0		6.1.1.10	Aminoacyl-tRNA biosynthesis	N
R03660	L-Phenylalanine:tRNA(Ala) ligase (AMP-forming)	C00002[c] + C00079[c] + C01648[c] --> C00020[c] + C00013[c] + C03511[c]	(pvm:113805595) or (pvm:113807853) or (pvm:113810111) or (pvm:113817360)	pvm:113805595;pvm:113807853;pvm:113810111;pvm:113817360	rn00970	0	1000	0		6.1.1.20	Aminoacyl-tRNA biosynthesis	N
R03661	L-proline:tRNA(Pro) ligase (AMP-forming)	C00002[c] + C00148[c] + C01649[c] --> C00020[c] + C00013[c] + C02702[c]	(pvm:113821846) or (pvm:113821891) or (pvm:113821891)	pvm:113821846;pvm:113821891;pvm:113821891	rn00970	0	1000	0		6.1.1.15	Aminoacyl-tRNA biosynthesis	N
R03662	L-Serine:tRNA(Ser) ligase (AMP-forming)	C00002[c] + C00065[c] + C01650[c] --> C00020[c] + C00013[c] + C02553[c]	(pvm:113824102) or (pvm:113826435) or (pvm:113826450) or (pvm:113829840)	pvm:113824102;pvm:113826435;pvm:113826450;pvm:113829840	rn00970	0	1000	0		6.1.1.11	Aminoacyl-tRNA biosynthesis	N
R03663	L-Threonine:tRNA(Thr) ligase (AMP-forming)	C00002[c] + C00188[c] + C01651[c] --> C00020[c] + C00013[c] + C02992[c]	(pvm:113803370)	pvm:113803370	rn00970	0	1000	0		6.1.1.3	Aminoacyl-tRNA biosynthesis	N
R03664	L-Tryptophan -tRNA(Trp) ligase (AMP-forming)	C00002[c] + C00078[c] + C01652[c] --> C00020[c] + C00013[c] + C03512[c]	(pvm:113805587)	pvm:113805587	rn00970	0	1000	0		6.1.1.2	Aminoacyl-tRNA biosynthesis	N
R03665	L-Valine:tRNAVal ligase (AMP-forming)	C00002[c] + C00183[c] + C01653[c] --> C00020[c] + C00013[c] + C02554[c]	(pvm:113809101) or (pvm:113814830)	pvm:113809101;pvm:113814830	rn00970	0	1000	0		6.1.1.9	Aminoacyl-tRNA biosynthesis	N
R03681	UDP-alpha-D-glucose:glycogenin alpha-D-glucosyltransferase	C00029[c] + C01702[c] --> C00015[c] + C02687[c]	(pvm:113826096)	pvm:113826096	rn01100	0	1000	0		2.4.1.186	Global and overview maps	N
R03688	L-fuconate hydro-lyase	C01720[c] --> C03827[c] + C00001[c]	(pvm:113824454)	pvm:113824454	rn00051	0	1000	0		4.2.1.68	Carbohydrate metabolism	N
R03689	lanosterol delta24-reductase	C01724[c] + C00005[c] + C00080[c] <=> C05109[c] + C00006[c]	(pvm:113820205) or (pvm:113820218)	pvm:113820205;pvm:113820218	rn00100	-1000	1000	0		1.3.1.72	Lipid metabolism	Y
R03697		C01516[c] + C03161[c] + C00067[c] + C00001[c] --> C06174[c] + C03024[c] + C00007[c]	(pvm:113829697) or (pvm:113801218) or (pvm:113802729) or (pvm:113802766) or (pvm:113803893) or (pvm:113803906) or (pvm:113803903) or (pvm:113803928) or (pvm:113805029) or (pvm:113805029) or (pvm:113805053)	pvm:113829697;pvm:113801218;pvm:113802729;pvm:113802766;pvm:113803893;pvm:113803906;pvm:113803903;pvm:113803928;pvm:113805029;pvm:113805029;pvm:113805053	rn00982	0	1000	0		1.14.14.1	Xenobiotics biodegradation and metabolism	N
R03701	S-Adenosyl-L-methionine:thiopurine S-methyltransferase	C00019[c] + C01756[c] --> C00021[c] + C16614[c]	(pvm:113818230) or (pvm:113818244)	pvm:113818230;pvm:113818244	rn00261	0	1000	0		2.1.1.67	Biosynthesis of other secondary metabolites	N
R03719	3alpha,7alpha,12alpha-trihydroxy-5beta-cholanoyl-CoA:propanoyl-CoA C-acyltransferase;	C00100[c] + C01794[c] --> C00010[c] + C05467[c]	(pvm:113825199)	pvm:113825199	rn00120	0	1000	0		2.3.1.176	Lipid metabolism	N
R03734	3,3',5-triiodo-L-thyronine,iodide:acceptor oxidoreductase (iodinating)	C01829[c] + C00030[c] --> C02465[c] + C00708[c] + C00028[c] + C00080[c]	(pvm:113816732) or (pvm:113817897)	pvm:113816732;pvm:113817897	rn00350	0	1000	0		1.21.99.4	Amino acid metabolism	N
R03744	ATP:tau-protein O-phosphotransferase	C00002[c] + C01867[c] --> C00008[c] + C03157[c]	(pvm:113813709) or (pvm:113813722)	pvm:113813709;pvm:113813722	rn00230	0	1000	0		2.7.11.26	Nucleotide metabolism	N
R03754	ATP:acylglycerol 3-phosphotransferase	C00002[c] + C15590[c] --> C00008[c] + C03849[c]	(pvm:113808337)	pvm:113808337	rn00230	0	1000	0		2.7.1.94	Nucleotide metabolism	N
R03755	acyl-CoA:2-acylglycerol O-acyltransferase	C00040[c] + C01885[c] --> C00010[c] + C00641[c]	(pvm:113802825)	pvm:113802825	rn00561	0	1000	0		2.3.1.22	Lipid metabolism	N
R03778	Octanoyl-CoA:acetyl-CoA C-acyltransferase	C01944[c] + C00024[c] <=> C00010[c] + C05265[c]	(pvm:113825167) or (pvm:113825170)	pvm:113825167;pvm:113825170	rn00071	-1000	1000	0		2.3.1.16	Lipid metabolism	Y
R03779	Octanoyl-CoA:L-carnitine O-octanoyltransferase	C01944[c] + C00318[c] --> C00010[c] + C02838[c]	(pvm:113824021)	pvm:113824021	rn00062	0	1000	0		2.3.1.137	Lipid metabolism	N
R03789	tRNA-guanosine34:queuine tRNA-D-ribosyltransferase	C01977[c] + C01449[c] <=> C01978[c] + C00242[c]	(pvm:113812422) or (pvm:113812421)	pvm:113812422;pvm:113812421	rn00230	-1000	1000	0		2.4.2.29	Nucleotide metabolism	Y
R03804	Monoamide of a dicarboxylic acid amidohydrolase	C04131[c] + C00001[c] --> C02028[c] + C00014[c]	(pvm:113827471)	pvm:113827471	rn01100	0	1000	0		3.5.1.3	Global and overview maps	N
R03805	S-adenosyl-L-methionine:mRNA (guanine-N7-)-methyltransferase	C00019[c] + C02031[c] + C00080[c] <=> C00021[c] + C02339[c]	(pvm:113817116)	pvm:113817116	rn00261	-1000	1000	0		2.1.1.56	Biosynthesis of other secondary metabolites	Y
R03815	dihydrolipoylprotein:NAD+ oxidoreductase	C02972[c] + C00003[c] --> C02051[c] + C00004[c] + C00080[c]	(pvm:113829387) or (pvm:113829410)	pvm:113829387;pvm:113829410	rn00260	0	1000	0		1.8.1.4	Amino acid metabolism	N
R03819	ATP:sedoheptulose 1-phosphotransferase	C00002[c] + C02076[c] --> C00008[c] + C06222[c]	(pvm:113801069) or (pvm:113801069)	pvm:113801069;pvm:113801069	rn00710	0	1000	0		2.7.1.3	Energy metabolism	N
R03840	ATP:5'-dephosphopolynucleotide 5'-phosphotransferase	C00002[c] + C02374[c] --> C00008[c] + C02128[c]	(pvm:113806003) or (pvm:113806008)	pvm:113806003;pvm:113806008	rn00230	0	1000	0		2.7.1.78	Nucleotide metabolism	N
R03858	Lauroyl-CoA:acetyl-CoA C-acyltransferase	C01832[c] + C00024[c] <=> C00010[c] + C05261[c]	(pvm:113825167) or (pvm:113825170)	pvm:113825167;pvm:113825170	rn00071	-1000	1000	0		2.3.1.16	Lipid metabolism	Y
R03867	(5-Glutamyl)-peptide:amino-acid 5-glutamyltransferase	C02166[c] + C00045[c] --> C05951[c] + C03363[c]	(pvm:113801114) or (pvm:113801149)	pvm:113801114;pvm:113801149	rn00590	0	1000	0		2.3.2.2	Lipid metabolism	N
R03869	(S)-Methylmalonate semialdehyde:NAD+ oxidoreductase	C06002[c] + C00003[c] + C00001[c] --> C02170[c] + C00004[c] + C00080[c]	(pvm:113825010) or (pvm:113825013) or (pvm:113826103) or (pvm:113826145) or (pvm:113826151) or (pvm:113826159) or (pvm:113826162) or (pvm:113816548)	pvm:113825010;pvm:113825013;pvm:113826103;pvm:113826145;pvm:113826151;pvm:113826159;pvm:113826162;pvm:113816548	rn00280	0	1000	0		1.2.1.3	Amino acid metabolism	N
R03874	[peptide]-(2S)-2-hydroxyglycine peptidyl-amide-lyase (glyoxylate-forming)	C03303[c] --> C02179[c] + C00048[c]	(pvm:113821369) or (pvm:113821378) or (pvm:113821378)	pvm:113821369;pvm:113821378;pvm:113821378	rn00230	0	1000	0		4.3.2.5	Nucleotide metabolism	N
R03889	2-Aminomuconate semialdehyde:NAD+ 6-oxidoreductase	C03824[c] + C00003[c] + C00001[c] --> C02220[c] + C00080[c] + C00004[c]	(pvm:113816554) or (pvm:113816555)	pvm:113816554;pvm:113816555	rn00380	0	1000	0		1.2.1.32	Amino acid metabolism	N
R03905	Glu-tRNA(Gln):L-glutamine amido-ligase(ADP-forming)	C02282[c] + C00025[c] + C00009[c] + C00008[c] --> C06112[c] + C00064[c] + C00002[c] + C00001[c]	(pvm:113816900) or (pvm:113820346) or (pvm:113828446)	pvm:113816900;pvm:113820346;pvm:113828446	rn00970	0	1000	0		6.3.5.7	Aminoacyl-tRNA biosynthesis	N
R03912	[peptide]-glycine,ascorbate:oxygen oxidoreductase (2-hydroxylating)	C02303[c] + 2 C00072[c] + C00007[c] --> C03303[c] + 2 C01041[c] + C00001[c]	(pvm:113813153) or (pvm:113813162)	pvm:113813153;pvm:113813162	rn01100	0	1000	0		1.14.17.3	Global and overview maps	N
R03913	protein-dithiol:NAD+ oxidoreductase;	C02315[c] + C00003[c] --> C02582[c] + C00004[c] + C00080[c]	(pvm:113830533) or (pvm:113830537)	pvm:113830533;pvm:113830537	rn00730	0	1000	0		1.8.1.8	Metabolism of cofactors and vitamins	N
R03914	protein-dithiol:NADP+ oxidoreductase;	C02315[c] + C00006[c] --> C02582[c] + C00005[c] + C00080[c]	(pvm:113830533) or (pvm:113830537)	pvm:113830533;pvm:113830537	rn00480	0	1000	0		1.8.1.8	Metabolism of other amino acids	N
R03915	glutathione:protein-disulfide oxidoreductase	C02315[c] + C00127[c] --> C02582[c] + 2 C00051[c]	(pvm:113802029)	pvm:113802029	rn00480	0	1000	0		1.8.4.2	Metabolism of other amino acids	N
R03916	(5-glutamyl)-peptide:amino-acid 5-glutamyltransferase	C02320[c] + C00001[c] --> C05729[c] + C00025[c]	(pvm:113801114) or (pvm:113801149)	pvm:113801114;pvm:113801149	rn00480	0	1000	0		2.3.2.2	Metabolism of other amino acids	N
R03922	S-adenosyl-L-methionine:5-(N7-methyl 5-triphosphoguanosine)-(purine-ribonucleotide)-[mRNA] 2-O-methyltransferase	C00019[c] + C02339[c] --> C00021[c] + C04802[c]	(pvm:113818201) or (pvm:113818203)	pvm:113818201;pvm:113818203	rn01100	0	1000	0		2.1.1.57	Global and overview maps	N
R03936	Formylkynurenine hydrolase	C02700[c] + C00001[c] --> C05653[c] + C00041[c]	(pvm:113799986)	pvm:113799986	rn00380	0	1000	0		3.7.1.3	Amino acid metabolism	N
R03940	10-Formyltetrahydrofolate:L-methionyl-tRNA N-formyltransferase	C02430[c] + C00234[c] --> C00101[c] + C03294[c]	(pvm:113821722)	pvm:113821722	rn00970	0	1000	0		2.1.2.9	Aminoacyl-tRNA biosynthesis	N
R03970	(5-glutamyl)-peptide:amino-acid 5-glutamyltransferase	C02512[c] + C00025[c] --> C05711[c] + C00001[c]	(pvm:113801114) or (pvm:113801149)	pvm:113801114;pvm:113801149	rn00460	0	1000	0		2.3.2.2	Metabolism of other amino acids	N
R03971	gamma-glutamyl-beta-aminopropiononitrile amidohydrolase	C05670[c] + C00025[c] --> C06114[c] + C00001[c]	(pvm:113801114) or (pvm:113801149)	pvm:113801114;pvm:113801149	rn00460	0	1000	0		2.3.2.2	Metabolism of other amino acids	N
R03983	Protein-glutamine:amine gamma-glutamyltransferase	C02583[c] + C01664[c] --> C03636[c] + C00014[c]	(pvm:113829798) or (pvm:113829804) or (pvm:113799956) or (pvm:113799959) or (pvm:113799967) or (pvm:113799977)	pvm:113829798;pvm:113829804;pvm:113799956;pvm:113799959;pvm:113799967;pvm:113799977	rn01100	0	1000	0		2.3.2.13	Global and overview maps	N
R03984	pyrimidodiazepine:glutathione-disulfide oxidoreductase (ring-opening, cyclizing)	C02587[c] + C00127[c] + C00001[c] <=> C03684[c] + 2 C00051[c]	(pvm:113828161) or (pvm:113828202)	pvm:113828161;pvm:113828202	rn00480	-1000	1000	0		1.5.4.1	Metabolism of other amino acids	Y
R03986	UDP-sugar sugarphosphohydrolase	C05227[c] + C00001[c] --> C00105[c] + C00991[c]	(pvm:113820749)	pvm:113820749	rn00240	0	1000	0		3.6.1.45	Nucleotide metabolism	N
R03992	Tetradecanoyl-CoA:glycylpeptide N-tetradecanoyltransferase	C02593[c] + C02038[c] --> C00010[c] + C03881[c]	(pvm:113829789)	pvm:113829789	rn00062	0	1000	0		2.3.1.97	Lipid metabolism	N
R04017	3'-Phosphoadenylylsulfate:galactosylceramide 3'-sulfotransferase	C00053[c] + C02686[c] <=> C00054[c] + C06125[c]	(pvm:113823251) or (pvm:113824400) or (pvm:113824408) or (pvm:113824411) or (pvm:113824411) or (pvm:113824415) or (pvm:113824423) or (pvm:113824427)	pvm:113823251;pvm:113824400;pvm:113824408;pvm:113824411;pvm:113824411;pvm:113824415;pvm:113824423;pvm:113824427	rn00600	-1000	1000	0		2.8.2.11	Lipid metabolism	Y
R04025	N-Acetylputrescine:oxygen oxidoreductase(deaminating)(flavin-containing)	C02714[c] + C00001[c] + C00007[c] --> C05936[c] + C00014[c] + C00027[c]	(pvm:113818908)	pvm:113818908	rn00330	0	1000	0		1.4.3.4	Amino acid metabolism	N
R04058	L-Glutaminyl-peptide gamma-gluramyltransferase (cyclizing)	C02986[c] --> C02805[c] + C00014[c]	(pvm:113811849)	pvm:113811849	rn01100	0	1000	0		2.3.2.5	Global and overview maps	N
R04062	S-Adenosyl-L-methionine:calmodulin-L-lysine N6-methyltransferase	C00019[c] + C02816[c] --> C00021[c] + C03941[c]	(pvm:113818226)	pvm:113818226	rn00261	0	1000	0		2.1.1.60	Biosynthesis of other secondary metabolites	N
R04065	Imidazole acetaldehyde:NAD+ oxidoreductase	C05130[c] + C00003[c] + C00001[c] --> C02835[c] + C00004[c] + C00080[c]	(pvm:113825010) or (pvm:113825013) or (pvm:113826103) or (pvm:113826145) or (pvm:113826151) or (pvm:113826159) or (pvm:113826162) or (pvm:113816548)	pvm:113825010;pvm:113825013;pvm:113826103;pvm:113826145;pvm:113826151;pvm:113826159;pvm:113826162;pvm:113816548	rn00340	0	1000	0		1.2.1.3	Amino acid metabolism	N
R04072	dolichyl-beta-D-mannosyl-phosphate:protein-serine O-D-mannosyltransferase	C03862[c] + C02189[c] --> C00110[c] + C02863[c]	(pvm:113814026) or (pvm:113814059) or (pvm:113814070) or (pvm:113814079) or (pvm:113814081)	pvm:113814026;pvm:113814059;pvm:113814070;pvm:113814079;pvm:113814081	rn00512	0	1000	0		2.4.1.109	Glycan biosynthesis and metabolism	N
R04073	Peptide-L-aspartate,2-oxoglutarate:oxygen oxidoreductase (3-hydroxylating)	C02871[c] + C00026[c] + C00007[c] --> C03957[c] + C00042[c] + C00011[c]	(pvm:113820574)	pvm:113820574	rn01100	0	1000	0		1.14.11.16	Global and overview maps	N
R04081	GDP-L-fucose:beta-D-galactosyl-R 2-fucosyltransferase	C00325[c] + C02900[c] --> C00035[c] + C04648[c]	(pvm:113806643) or (pvm:113806645) or (pvm:113806645) or (pvm:113806668) or (pvm:113806669)	pvm:113806643;pvm:113806645;pvm:113806645;pvm:113806668;pvm:113806669	rn00051	0	1000	0		2.4.1.69	Carbohydrate metabolism	N
R04090	S-(2-Hydroxyacyl)glutathione hydrolase	C03899[c] + C00001[c] --> C00051[c] + C02929[c]	(pvm:113800847)	pvm:113800847	rn01100	0	1000	0		3.1.2.6	Global and overview maps	N
R04096	3-Methylbutanoyl-CoA:(acceptor) oxidoreductase	C02939[c] + C04253[c] --> C03069[c] + C04570[c]	(pvm:113827164)	pvm:113827164	rn00280	0	1000	0		1.3.8.4	Amino acid metabolism	N
R04097	3-methylbutanoyl-CoA:enzyme N6-(dihydrolipoyl)lysine S-(3-methylbutanoyl)transferase	C02939[c] + C15973[c] --> C00010[c] + C15975[c]	(pvm:113825174)	pvm:113825174	rn00280	0	1000	0		2.3.1.168	Amino acid metabolism	N
R04100	3-cis-Dodecenoyl-CoA delta3-cis-delta2-trans-isomerase	C02944[c] <=> C03221[c]	(pvm:113819216) or (pvm:113820342) or (pvm:113824967) or (pvm:113829507)	pvm:113819216;pvm:113820342;pvm:113824967;pvm:113829507	rn01100	-1000	1000	0		5.3.3.8	Global and overview maps	Y
R04120	peptide-L-methionine:thioredoxin-disulfide S-oxidoreductase [L-methionine (S)-S-oxide-forming]	C03023[c] + C00343[c] + C00001[c] --> C03895[c] + C00342[c]	(pvm:113800412)	pvm:113800412	rn01100	0	1000	0		1.8.4.11	Global and overview maps	N
R04121	fatty acid,reduced-flaboprotein:oxygen oxidoreductase (RH-hydroxylating or -epoxidizing)	C03024[c] + C00162[c] + C00007[c] --> C05102[c] + C03161[c] + C00001[c]	(pvm:113829697) or (pvm:113801218) or (pvm:113802729) or (pvm:113802766) or (pvm:113803893) or (pvm:113803906) or (pvm:113803903) or (pvm:113803928) or (pvm:113805029) or (pvm:113805029) or (pvm:113805053)	pvm:113829697;pvm:113801218;pvm:113802729;pvm:113802766;pvm:113803893;pvm:113803906;pvm:113803903;pvm:113803928;pvm:113805029;pvm:113805029;pvm:113805053	rn00071	0	1000	0		1.14.14.1	Lipid metabolism	N
R04122	alkane,reduced-flavoprotein:oxygen oxidoreductase (RH-hydroxylating)	C03024[c] + C01371[c] + C00007[c] --> C03161[c] + C01335[c] + C00001[c]	(pvm:113829697) or (pvm:113801218) or (pvm:113802729) or (pvm:113802766) or (pvm:113803893) or (pvm:113803906) or (pvm:113803903) or (pvm:113803928) or (pvm:113805029) or (pvm:113805029) or (pvm:113805053)	pvm:113829697;pvm:113801218;pvm:113802729;pvm:113802766;pvm:113803893;pvm:113803906;pvm:113803903;pvm:113803928;pvm:113805029;pvm:113805029;pvm:113805053	rn00071	0	1000	0		1.14.14.1	Lipid metabolism	N
R04125	[protein]-S8-aminomethyldihydrolipoyllysine:tetrahydrofolate aminomethyltransferase (ammonia-forming)	C01242[c] + C00101[c] --> C02972[c] + C00143[c] + C00014[c]	(pvm:113820606)	pvm:113820606	rn00260	0	1000	0		2.1.2.10	Amino acid metabolism	N
R04137	3-hydroxyisovaleryl-CoA hydro-lyase	C05998[c] <=> C03069[c] + C00001[c]	(pvm:113813772) or (pvm:113813772)	pvm:113813772;pvm:113813772	rn00280	-1000	1000	0		4.2.1.17	Amino acid metabolism	Y
R04138	3-Methylcrotonoyl-CoA:carbon-dioxide ligase (ADP-forming)	C00002[c] + C03069[c] + C00288[c] + C00080[c] --> C00008[c] + C00009[c] + C03231[c]	(pvm:113803001) or (pvm:113808707) or (pvm:113825148)	pvm:113803001;pvm:113808707;pvm:113825148	rn00280	0	1000	0		6.4.1.4	Amino acid metabolism	N
R04141	4-Methylumbelliferyl-acetate acylhydrolase	C03837[c] + C00001[c] --> C03081[c] + C00033[c]	(pvm:113803694) or (pvm:113803695)	pvm:113803694;pvm:113803695	rn00010	0	1000	0		3.1.1.56	Carbohydrate metabolism	N
R04144	5-Phospho-D-ribosylamine:glycine ligase (ADP-forming)	C00002[c] + C03090[c] + C00037[c] --> C00008[c] + C00009[c] + C03838[c]	(pvm:113811742)	pvm:113811742	rn00230	0	1000	0		6.3.4.13	Nucleotide metabolism	N
R04159	(5-L-glutamyl)-peptide:amino-acid 5-glutamyltransferase	C03193[c] + C00045[c] --> C00012[c] + C03363[c]	(pvm:113801114) or (pvm:113801149)	pvm:113801114;pvm:113801149	rn00330	0	1000	0		2.3.2.2	Amino acid metabolism	N
R04162	1-Alkyl-2-acyl-sn-glycero-3-phosphate phosphohydrolase	C05977[c] + C00001[c] --> C03201[c] + C00009[c]	(pvm:113806755) or (pvm:113806765) or (pvm:113806775) or (pvm:113806775)	pvm:113806755;pvm:113806765;pvm:113806775;pvm:113806775	rn00565	0	1000	0		3.1.3.4	Lipid metabolism	N
R04171	3-Hydroxy-L-kynurenine:2-oxoglutarate aminotransferase	C03227[c] + C00026[c] --> C05645[c] + C00025[c]	(pvm:113812331) or (pvm:113812334) or (pvm:113813400) or (pvm:113813400) or (pvm:113813421) or (pvm:113813424) or (pvm:113813427) or (pvm:113813430) or (pvm:113813433)	pvm:113812331;pvm:113812334;pvm:113813400;pvm:113813400;pvm:113813421;pvm:113813424;pvm:113813427;pvm:113813430;pvm:113813433	rn00380	0	1000	0		2.6.1.7	Amino acid metabolism	N
R04173	3-Phosphoserine:2-oxoglutarate aminotransferase	C01005[c] + C00026[c] <=> C03232[c] + C00025[c]	(pvm:113811237)	pvm:113811237	rn00260	-1000	1000	0		2.6.1.52	Amino acid metabolism	Y
R04176	NAD+:poly(adenosine diphosphate D-ribose)ADP-D-ribosyltransferase	C00003[c] + C03245[c] --> C00153[c] + C03245[c] + C00080[c]	(pvm:113813472) or (pvm:113813478) or (pvm:113813481) or (pvm:113813493) or (pvm:113814688) or (pvm:113814709) or (pvm:113814727) or (pvm:113814743) or (pvm:113815938) or (pvm:113815957) or (pvm:113815990) or (pvm:113816012) or (pvm:113817247) or (pvm:113817257) or (pvm:113817258) or (pvm:113817259) or (pvm:113817260) or (pvm:113817261) or (pvm:113817262) or (pvm:113817277)	pvm:113813472;pvm:113813478;pvm:113813481;pvm:113813493;pvm:113814688;pvm:113814709;pvm:113814727;pvm:113814743;pvm:113815938;pvm:113815957;pvm:113815990;pvm:113816012;pvm:113817247;pvm:113817257;pvm:113817258;pvm:113817259;pvm:113817260;pvm:113817261;pvm:113817262;pvm:113817277	rn00730	0	1000	0		2.4.2.30	Metabolism of cofactors and vitamins	N
R04178	coproporphyrinogen-III:oxygen oxidoreductase (coproporphyrin-forming)	C03263[c] + 3 C00007[c] --> C05770[c] + 3 C00027[c]	(pvm:113823675)	pvm:113823675	rn00860	0	1000	0		1.3.3.15	Metabolism of cofactors and vitamins	N
R04183	alpha-N-Acetyl-D-galactosaminide N-acetylgalactosaminohydrolase	C03272[c] + C01132[c] --> C04925[c] + C00001[c]	(pvm:113827826) or (pvm:113827838)	pvm:113827826;pvm:113827838	rn00052	0	1000	0		3.2.1.49	Carbohydrate metabolism	N
R04184	Trihexosylceramide N-acetylhexosaminohydrolase	C04737[c] + C01132[c] --> C03272[c] + C00001[c]	(pvm:113823303) or (pvm:113823305) or (pvm:113823305) or (pvm:113823306) or (pvm:113823306) or (pvm:113823307) or (pvm:113823307) or (pvm:113823330) or (pvm:113823358) or (pvm:113824451) or (pvm:113824467)	pvm:113823303;pvm:113823305;pvm:113823305;pvm:113823306;pvm:113823306;pvm:113823307;pvm:113823307;pvm:113823330;pvm:113823358;pvm:113824451;pvm:113824467	rn00052	0	1000	0		3.2.1.52	Carbohydrate metabolism	N
R04188	L-3-amino-isobutanoate:2-oxoglutarate aminotransferase	C03284[c] + C00026[c] <=> C06002[c] + C00025[c]	(pvm:113801965) or (pvm:113803028)	pvm:113801965;pvm:113803028	rn00280	-1000	1000	0		2.6.1.22	Amino acid metabolism	Y
R04190	S-Adenosyl-L-methionine:protein-L-isoaspartate O-methyltransferase	C00019[c] + C03306[c] --> C00021[c] + C04311[c]	(pvm:113819456)	pvm:113819456	rn00261	0	1000	0		2.1.1.77	Biosynthesis of other secondary metabolites	N
R04192	Acetyl-CoA:alpha-tubulin-L-lysine N(epsilon)-acetyltransferase	C00024[c] + C03318[c] --> C00010[c] + C04149[c]	(pvm:113822921)	pvm:113822921	rn00010	0	1000	0		2.3.1.108	Carbohydrate metabolism	N
R04204	(2S,3S)-3-Hydroxy-2-methylbutanoyl-CoA hydro-liase	C04405[c] --> C03345[c] + C00001[c]	(pvm:113813772) or (pvm:113813772)	pvm:113813772;pvm:113813772	rn00280	0	1000	0		4.2.1.17	Amino acid metabolism	N
R04208	2-(Formamido)-N1-(5-phosphoribosyl)acetamidine cyclo-ligase (ADP-forming)	C00002[c] + C04640[c] --> C00008[c] + C00009[c] + C03373[c]	(pvm:113808323)	pvm:113808323	rn00230	0	1000	0		6.3.3.1	Nucleotide metabolism	N
R04209	1-(5-phospho-D-ribosyl)-5-amino-4-imidazolecarboxylate carboxy-lyase	C04751[c] <=> C03373[c] + C00011[c]	(pvm:113811782) or (pvm:113812931)	pvm:113811782;pvm:113812931	rn00230	-1000	1000	0		4.1.1.21	Nucleotide metabolism	Y
R04212	Asp-tRNA(Asn):L-glutamine amido-ligase (ADP-forming)	C03402[c] + C00025[c] + C00009[c] + C00008[c] --> C06113[c] + C00064[c] + C00002[c] + C00001[c]	(pvm:113828353) or (pvm:113828361) or (pvm:113808616)	pvm:113828353;pvm:113828361;pvm:113808616	rn00970	0	1000	0		6.3.5.6	Aminoacyl-tRNA biosynthesis	N
R04215	CTP:N-glycoloylneuraminate cytidylyltransferase	C00063[c] + C03410[c] <=> C00013[c] + C03691[c]	(pvm:113829124)	pvm:113829124	rn00520	-1000	1000	0		2.7.7.43	Carbohydrate metabolism	Y
R04216	dolichyl-diphosphooligosaccharide:protein-L-asparagine oligopolysaccharidotransferase	C04213[c] + C03021[c] --> C00621[c] + C11572[c]	(pvm:113820737) or (pvm:113820745) or (pvm:113820748)	pvm:113820737;pvm:113820745;pvm:113820748	rn00510	0	1000	0		2.4.99.18	Glycan biosynthesis and metabolism	N
R04221	cis-4-Hydroxy-D-proline:oxygen oxidoreductase (deaminating)	C03440[c] + C00007[c] --> C04282[c] + C00027[c]	(pvm:113818896)	pvm:113818896	rn00330	0	1000	0		1.4.3.3	Amino acid metabolism	N
R04224	(S)-3-Hydroxyisobutyryl-CoA hydro-lyase	C03460[c] + C00001[c] --> C06000[c]	(pvm:113813772) or (pvm:113813772)	pvm:113813772;pvm:113813772	rn00280	0	1000	0		4.2.1.17	Amino acid metabolism	N
R04225	(S)-3-Methyl-2-oxopentanoate:[dihydrolipoyllysine-residue (2-methylpropanoyl)transferase] lipoyllysine 2-oxidoreductase (decarboxylating, acceptor-2-methylpropanoylating)	C00671[c] + C15972[c] <=> C15979[c] + C00011[c]	(pvm:113815389) or (pvm:113816682)	pvm:113815389;pvm:113816682	rn01100	-1000	1000	0		1.2.4.4	Global and overview maps	Y
R04230	(R)-4'-phosphopantothenate:L-cysteine ligase (ATP-utilizing)	C00002[c] + C03492[c] + C00097[c] --> C00020[c] + C00013[c] + C04352[c]	(pvm:113825804)	pvm:113825804	rn00770	0	1000	0		6.3.2.51	Metabolism of cofactors and vitamins	N
R04238	Aminoacyl-tRNA aminoacylhydrolase	C03880[c] + C00001[c] --> C03523[c] + C00066[c]	(pvm:113800933) or (pvm:113800962) or (pvm:113800962) or (pvm:113800965)	pvm:113800933;pvm:113800962;pvm:113800962;pvm:113800965	rn01100	0	1000	0		3.1.1.29	Global and overview maps	N
R04247	CTP:ethanolamine-phosphate cytidylyltransferase	C00063[c] + C03557[c] --> C00013[c] + C05673[c]	(pvm:113826839)	pvm:113826839	rn00440	0	1000	0		2.7.7.14	Metabolism of other amino acids	N
R04268	N-Formyl-L-methionylaminoacyl-tRNA amidohydrolase	C04258[c] + C00001[c] --> C00058[c] + C03617[c]	(pvm:113802076)	pvm:113802076	rn01100	0	1000	0		3.5.1.88	Global and overview maps	N
R04273	Peptidylproline cis-trans-isomerase	C03798[c] <=> C03633[c]	(pvm:113825691) or (pvm:113826882) or (pvm:113827997) or (pvm:113828004) or (pvm:113829160) or (pvm:113830246) or (pvm:113813306) or (pvm:113820210) or (pvm:113830372) or (pvm:113822424) or (pvm:113823532) or (pvm:113829235) or (pvm:113802720) or (pvm:113802720) or (pvm:113802720) or (pvm:113802726) or (pvm:113804907) or (pvm:113804907) or (pvm:113809501) or (pvm:113809501) or (pvm:113810670) or …	pvm:113825691;pvm:113826882;pvm:113827997;pvm:113828004;pvm:113829160;pvm:113830246;pvm:113813306;pvm:113820210;pvm:113830372;pvm:113822424;pvm:113823532;pvm:113829235;pvm:113802720;pvm:113802720;pvm:113802720;pvm:113802726;pvm:113804907;pvm:113804907;pvm:113809501;pvm:113809501;pvm:113810670;pvm:113812942;pvm:113818967;pvm:113818976;pvm:113820154	rn01100	-1000	1000	0		5.2.1.8	Global and overview maps	Y
R04274	RNA-3'-phosphate:RNA ligase (cyclizing, AMP-forming)	C00002[c] + C03638[c] --> C00020[c] + C00013[c] + C04312[c]	(pvm:113827503)	pvm:113827503	rn01100	0	1000	0		6.5.1.4	Global and overview maps	N
R04286	2-amino-4-hydroxy-6-(erythro-1,2,3-trihydroxypropyl) dihydropteridine triphosphate lyase	C04895[c] --> C03684[c] + C00536[c]	(pvm:113827918)	pvm:113827918	rn00790	0	1000	0		4.2.3.12	Metabolism of cofactors and vitamins	N
R04291	UDP-N-acetyl-D-glucosamine:lysosomal-enzyme N-acetylglucosaminephosphotransferase	C00043[c] + C03706[c] --> C00105[c] + C04789[c]	(pvm:113825393)	pvm:113825393	rn00240	0	1000	0		2.7.8.17	Nucleotide metabolism	N
R04294	2'-Deoxyribonucleoside diphosphate:oxidized-thioredoxin 2'-oxidoreductase	C04232[c] + C00343[c] + C00001[c] --> C03723[c] + C00342[c]	(pvm:113821498)	pvm:113821498	rn01100	0	1000	0		1.17.4.1	Global and overview maps	N
R04311	1-Acyl-glycerone-3-phosphate:long-chain-alcohol O-3-phospho-2-oxopropanyltransferase	C03372[c] + C00339[c] --> C03715[c] + C03129[c]	(pvm:5333213)	pvm:5333213	rn00565	0	1000	0		2.5.1.26	Lipid metabolism	N
R04314	DNA-6-O-methylguanine:protein-L-cysteine S-methyltransferase	C04250[c] + C02743[c] --> C03800[c] + C11475[c]	(pvm:113818229)	pvm:113818229	rn01100	0	1000	0		2.1.1.63	Global and overview maps	N
R04321	CDP-choline:1-alkyl-2-acetylglycerol cholinephosphotransferase	C00307[c] + C03820[c] + C00080[c] --> C00055[c] + C04598[c]	(pvm:113825401)	pvm:113825401	rn00565	0	1000	0		2.7.8.2	Lipid metabolism	N
R04322	UDP-alpha-D-galactose:2-(2-hydroxyacyl)sphingosine 1-beta-D-galactosyltransferase	C00052[c] + C03823[c] --> C00015[c] + C04708[c]	(pvm:113828240)	pvm:113828240	rn00052	0	1000	0		2.4.1.47	Carbohydrate metabolism	N
R04325	10-formyltetrahydrofolate:5'-phosphoribosylglycinamide formyltransferase	C00234[c] + C03838[c] --> C00101[c] + C04376[c]	(pvm:113820625)	pvm:113820625	rn00230	0	1000	0		2.1.2.2	Nucleotide metabolism	N
R04326		C03838[c] + C00445[c] + C00001[c] --> C04376[c] + C00101[c] + C00080[c]	(pvm:113820625)	pvm:113820625	rn00670	0	1000	0		2.1.2.2	Metabolism of cofactors and vitamins	N
R04339	thiomorpholine-3-carboxylate:NAD+ 5,6-oxidoreductase	C03901[c] + C00003[c] --> C04445[c] + C00004[c] + C00080[c]	(pvm:113820123)	pvm:113820123	rn00730	0	1000	0		1.5.1.25	Metabolism of cofactors and vitamins	N
R04340	thiomorpholine-3-carboxylate:NADP+ 5,6-oxidoreductase	C03901[c] + C00006[c] --> C04445[c] + C00005[c] + C00080[c]	(pvm:113820123)	pvm:113820123	rn00480	0	1000	0		1.5.1.25	Metabolism of other amino acids	N
R04352	UDPglucuronate beta-D-glucuronosyltransferase(acceptor-unspecific)	C04373[c] + C00167[c] --> C11136[c] + C00015[c]	(pvm:113823738) or (pvm:113823745) or (pvm:113823747) or (pvm:113823748) or (pvm:113823750) or (pvm:113823750) or (pvm:113823785) or (pvm:113823789) or (pvm:113823789) or (pvm:113823792) or (pvm:113823795)	pvm:113823738;pvm:113823745;pvm:113823747;pvm:113823748;pvm:113823750;pvm:113823750;pvm:113823785;pvm:113823789;pvm:113823789;pvm:113823792;pvm:113823795	rn00140	0	1000	0		2.4.1.17	Lipid metabolism	N
R04353	UDPglucuronate beta-D-glucuronosyltransferase(acceptor-unspecific)	C05299[c] + C00167[c] --> C11132[c] + C00015[c]	(pvm:113823738) or (pvm:113823745) or (pvm:113823747) or (pvm:113823748) or (pvm:113823750) or (pvm:113823750) or (pvm:113823785) or (pvm:113823789) or (pvm:113823789) or (pvm:113823792) or (pvm:113823795)	pvm:113823738;pvm:113823745;pvm:113823747;pvm:113823748;pvm:113823750;pvm:113823750;pvm:113823785;pvm:113823789;pvm:113823789;pvm:113823792;pvm:113823795	rn00140	0	1000	0		2.4.1.17	Lipid metabolism	N
R04354	UDPglucuronate beta-D-glucuronosyltransferase(acceptor-unspecific)	C05302[c] + C00167[c] --> C11131[c] + C00015[c]	(pvm:113823738) or (pvm:113823745) or (pvm:113823747) or (pvm:113823748) or (pvm:113823750) or (pvm:113823750) or (pvm:113823785) or (pvm:113823789) or (pvm:113823789) or (pvm:113823792) or (pvm:113823795)	pvm:113823738;pvm:113823745;pvm:113823747;pvm:113823748;pvm:113823750;pvm:113823750;pvm:113823785;pvm:113823789;pvm:113823789;pvm:113823792;pvm:113823795	rn00140	0	1000	0		2.4.1.17	Lipid metabolism	N
R04358	ATP:[DNA-directed RNA polymerase] phosphotransferase	C00002[c] + C03959[c] --> C00008[c] + C04395[c]	(pvm:113809155) or (pvm:113810205) or (pvm:113810216) or (pvm:113810228) or (pvm:113810241) or (pvm:113810265)	pvm:113809155;pvm:113810205;pvm:113810216;pvm:113810228;pvm:113810241;pvm:113810265	rn00230	0	1000	0		2.7.11.23	Nucleotide metabolism	N
R04362	1-Alkyl-sn-glycero-3-phosphoethanolamine ethanolaminehydrolase	C04476[c] + C00001[c] --> C03968[c] + C00189[c]	(pvm:113823507)	pvm:113823507	rn00564	0	1000	0		3.1.4.39	Lipid metabolism	N
R04368	m7G5'ppp5'X m7GMP phosphohydrolase	C04696[c] + C00001[c] --> C03998[c] + C16669[c]	(pvm:113827645)	pvm:113827645	rn01100	0	1000	0		3.6.1.59	Global and overview maps	N
R04378	1-(5'-Phosphoribosyl)-5-amino-4-imidazolecarboxamide:pyrophosphate phosphoribosyltransferase	C04677[c] + C00013[c] <=> C04051[c] + C00119[c]	(pvm:113818333)	pvm:113818333	rn00230	-1000	1000	0		2.4.2.7	Nucleotide metabolism	Y
R04386	carboxybiotin-carboxyl-carrier-protein:acetyl-CoA carboxytransferase	C00024[c] + C04419[c] + C00080[c] --> C00083[c] + C06250[c]	(pvm:113821730)	pvm:113821730	rn00780	0	1000	0		2.1.3.15	Metabolism of cofactors and vitamins	N
R04389	Heparosan-N-sulfate D-glucuronate glucurono-5-epimerase	C04196[c] <=> C04073[c]	(pvm:113816366)	pvm:113816366	rn01100	-1000	1000	0		5.1.3.17	Global and overview maps	Y
R04391	ATP:pantothenate 4'-phosphotransferase	C00002[c] + C04079[c] --> C00008[c] + C04352[c]	(pvm:113802613)	pvm:113802613	rn00770	0	1000	0		2.7.1.33	Metabolism of cofactors and vitamins	N
R04404	Phosphatidyl-myo-inositol-4,5-bisphosphate 4-phosphohydrolase	C04637[c] + C00001[c] --> C01277[c] + C00009[c]	(pvm:113804554) or (pvm:113804556) or (pvm:113805647) or (pvm:113805649)	pvm:113804554;pvm:113804556;pvm:113805647;pvm:113805649	rn00562	0	1000	0		3.1.3.36	Carbohydrate metabolism	N
R04420	5-methylthio-5-deoxy-D-ribose-1-phosphate ketol-isomerase	C04188[c] --> C04582[c]	(pvm:113829485)	pvm:113829485	rn00270	0	1000	0		5.3.1.23	Amino acid metabolism	N
R04432	propanoyl-CoA:electron-transfer flavoprotein 2,3-oxidoreductase	C04253[c] + C00100[c] <=> C04570[c] + C00894[c]	(pvm:113827158)	pvm:113827158	rn00410	-1000	1000	0		1.3.8.1	Metabolism of other amino acids	Y
R04433	Electron-transferring-flavoprotein:ubiquinone oxidoreductase	C04570[c] + C00399[c] --> C04253[c] + C00390[c]	(pvm:113828203) or (pvm:113829236)	pvm:113828203;pvm:113829236	rn00130	0	1000	0		1.5.5.1	Metabolism of cofactors and vitamins	N
R04437	protein N6-(4-Aminobutyl)-L-lysine, hydrogen-donor:oxygen oxidoreductase (2-hydroxylating)	C07282[c] + C00030[c] + C00007[c] --> C04679[c] + C00028[c] + C00001[c]	(pvm:113815549)	pvm:113815549	rn01100	0	1000	0		1.14.99.29	Global and overview maps	N
R04444	L-1-pyrroline-3-hydroxy-5-carboxylate:NAD+ oxidoreductase	C04281[c] + C00003[c] + 2 C00001[c] --> C05947[c] + C00004[c] + C00080[c]	(pvm:113817770)	pvm:113817770	rn00330	0	1000	0		1.2.1.88	Amino acid metabolism	N
R04445	L-1-pyrroline-3-hydroxy-5-carboxylate:NADP+ oxidoreductase	C04281[c] + C00006[c] + 2 C00001[c] --> C05947[c] + C00005[c] + C00080[c]	(pvm:113817770)	pvm:113817770	rn00330	0	1000	0		1.2.1.88	Amino acid metabolism	N
R04452	1-Alkyl-2-acetyl-sn-glycero-3-phosphocholine acetohydrolase	C04598[c] + C00001[c] --> C04317[c] + C00033[c]	(pvm:113802528) or (pvm:113802542) or (pvm:113802550) or (pvm:113802551)	pvm:113802528;pvm:113802542;pvm:113802550;pvm:113802551	rn00565	0	1000	0		3.1.1.47	Lipid metabolism	N
R04463	5'-Phosphoribosylformylglycinamide:L-glutamine amido-ligase (ADP-forming)	C00002[c] + C04376[c] + C00064[c] + C00001[c] --> C00008[c] + C00009[c] + C04640[c] + C00025[c]	(pvm:113816845)	pvm:113816845	rn00230	0	1000	0		6.3.5.3	Nucleotide metabolism	N
R04466	Acetyl-CoA:heparan-alpha-D-glucosaminide N-acetyltransferase	C00024[c] + C04384[c] --> C00010[c] + C04649[c]	(pvm:113827487) or (pvm:113827514)	pvm:113827487;pvm:113827514	rn00010	0	1000	0		2.3.1.78	Carbohydrate metabolism	N
R04480	Acyl-CoA:1-acyl-sn-glycero-3-phosphoethanolamine O-acyltransferase	C00350[c] + C00010[c] --> C04438[c] + C00040[c]	(pvm:113806206) or (pvm:113806207)	pvm:113806206;pvm:113806207	rn00564	0	1000	0		2.3.1.23	Lipid metabolism	N
R04494	UDP-N-acetyl-D-glucosamine:N-acetyl-D-glucosaminyl diphosphodolichol N-acetyl-D-glucosaminyltransferase	C00043[c] + C04500[c] --> C00015[c] + C04537[c]	(pvm:113822429) or (pvm:113822429) or (pvm:113821440)	pvm:113822429;pvm:113822429;pvm:113821440	rn00240	0	1000	0		2.4.1.141	Nucleotide metabolism	N
R04495	UDP-alpha-D-galactose:N-acetyl-beta-D-glucosaminylglycopeptide 4-beta-galactosyltransferase	C00052[c] + C04502[c] --> C00015[c] + C04818[c]	(pvm:113823591) or (pvm:113823596) or (pvm:113823598) or (pvm:113823599) or (pvm:113823603) or (pvm:113823604)	pvm:113823591;pvm:113823596;pvm:113823598;pvm:113823599;pvm:113823603;pvm:113823604	rn00052	0	1000	0		2.4.1.38	Carbohydrate metabolism	N
R04496	S-Adenosyl-L-methionine:protein-C-terminal-S-farnesyl-L-cysteine O-methyltransferase	C00019[c] + C04506[c] --> C00021[c] + C04748[c]	(pvm:113803114)	pvm:113803114	rn00900	0	1000	0		2.1.1.100	Metabolism of terpenoids and polyketides	N
R04502	GDPmannose:chitobiosyldiphosphodolichol beta-D-mannosyltransferase	C00096[c] + C04537[c] --> C00035[c] + C05860[c]	(pvm:113821442)	pvm:113821442	rn00051	0	1000	0		2.4.1.142	Carbohydrate metabolism	N
R04506	3alpha,7alpha-Dihydroxy-5beta-cholestan-26-al:NAD+ oxidoreductase	C05445[c] + C00003[c] + C00001[c] --> C04554[c] + C00004[c] + C00080[c]	(pvm:113825010) or (pvm:113825013) or (pvm:113826103) or (pvm:113826145) or (pvm:113826151) or (pvm:113826159) or (pvm:113826162) or (pvm:113816548)	pvm:113825010;pvm:113825013;pvm:113826103;pvm:113826145;pvm:113826151;pvm:113826159;pvm:113826162;pvm:113816548	rn00120	0	1000	0		1.2.1.3	Lipid metabolism	N
R04513	Phosphatidylinositol-3,4,5-trisphosphate 3-phosphohydrolase	C05981[c] + C00001[c] --> C04637[c] + C00009[c]	(pvm:113817499)	pvm:113817499	rn00562	0	1000	0		3.1.3.67	Carbohydrate metabolism	N
R04545	ATP:1-phosphatidyl-1D-myo-inositol-4,5-bisphosphate 3-phosphotransferase	C00002[c] + C04637[c] --> C00008[c] + C05981[c]	(pvm:113819478) or (pvm:113819483)	pvm:113819478;pvm:113819483	rn00562	0	1000	0		2.7.1.153	Carbohydrate metabolism	N
R04552	(13E)-(15S)-11alpha,15-dihydroxy-9-oxoprost-13-enoate:NADP+ 15-oxidoreductase	C04741[c] + C00006[c] --> C04654[c] + C00005[c] + C00080[c]	(pvm:113813960) or (pvm:113807731) or (pvm:113800629)	pvm:113813960;pvm:113807731;pvm:113800629	rn00480	0	1000	0		1.1.1.197	Metabolism of other amino acids	N
R04556	(5Z)-(15S)-11alpha-hydroxy-9,15-dioxoprostanoate:NAD+ delta13-oxidoreductase	C04671[c] + C00003[c] --> C04707[c] + C00004[c] + C00080[c]	(pvm:113819046) or (pvm:113819050) or (pvm:113819053) or (pvm:113819055) or (pvm:113819071) or (pvm:113819076)	pvm:113819046;pvm:113819050;pvm:113819053;pvm:113819055;pvm:113819071;pvm:113819076	rn00730	0	1000	0		1.3.1.48	Metabolism of cofactors and vitamins	N
R04557	(5Z)-(15S)-11alpha-hydroxy-9,15-dioxoprostanoate:NADP+ delta13-oxidoreductase	C04671[c] + C00006[c] --> C04707[c] + C00005[c] + C00080[c]	(pvm:113819046) or (pvm:113819050) or (pvm:113819053) or (pvm:113819055) or (pvm:113819071) or (pvm:113819076)	pvm:113819046;pvm:113819050;pvm:113819053;pvm:113819055;pvm:113819071;pvm:113819076	rn00480	0	1000	0		1.3.1.48	Metabolism of other amino acids	N
R04559	1-(5'-Phosphoribosyl)-5-amino-4-(N-succinocarboxamide)-imidazole AMP-lyase	C04823[c] <=> C00122[c] + C04677[c]	(pvm:113820224)	pvm:113820224	rn00230	-1000	1000	0		4.3.2.2	Nucleotide metabolism	Y
R04560	10-Formyltetrahydrofolate:5'-phosphoribosyl-5-amino-4-imidazolecarboxamide formyltransferase	C00234[c] + C04677[c] <=> C00101[c] + C04734[c]	(pvm:113821701) or (pvm:113821710)	pvm:113821701;pvm:113821710	rn00670	-1000	1000	0		2.1.2.3	Metabolism of cofactors and vitamins	Y
R04562	Biotin:apo-[acetyl-CoA:carbondioxide ligase (ADP-forming)] ligase (AMP-forming)	C00002[c] + C00120[c] + C04735[c] --> C00020[c] + C00013[c] + C04681[c]	(pvm:113815272)	pvm:113815272	rn00780	0	1000	0		6.3.4.15	Metabolism of cofactors and vitamins	N
R04563	Biotin:apo[methylmalonyl-CoA:pyruvate carboxyltransferase] ligase (AMP-forming)	C00002[c] + C00120[c] + C04736[c] --> C00020[c] + C00013[c] + C04682[c]	(pvm:113803894)	pvm:113803894	rn00780	0	1000	0		6.3.4.9	Metabolism of cofactors and vitamins	N
R04571	plasmanylethanolamine,ferrocytochrome b5:oxygen oxidoreductase (plasmenylethanolamine-forming)	C04475[c] + 2 C00999[c] + C00007[c] + 2 C00080[c] --> C04756[c] + 2 C00996[c] + 2 C00001[c]	(pvm:113814341) or (pvm:113814344)	pvm:113814341;pvm:113814344	rn00565	0	1000	0		1.14.19.77	Lipid metabolism	N
R04582	Biotin:apo-[propionyl-CoA:carbon-dioxide ligase (ADP-forming)]	C00002[c] + C00120[c] + C04763[c] --> C00020[c] + C00013[c] + C04727[c]	(pvm:113809384)	pvm:113809384	rn00780	0	1000	0		6.3.4.10	Metabolism of cofactors and vitamins	N
R04586	N-Acetyl-D-galactosaminyl-(N-acetylneuraminyl)-D-galactosyl-D- glucosylceramide N-acetylhexosaminohydrolase	C04884[c] + C00001[c] --> C04730[c] + C01132[c]	(pvm:113823303) or (pvm:113823305) or (pvm:113823305) or (pvm:113823306) or (pvm:113823306) or (pvm:113823307) or (pvm:113823307) or (pvm:113823330) or (pvm:113823358) or (pvm:113824451) or (pvm:113824467)	pvm:113823303;pvm:113823305;pvm:113823305;pvm:113823306;pvm:113823306;pvm:113823307;pvm:113823307;pvm:113823330;pvm:113823358;pvm:113824451;pvm:113824467	rn00052	0	1000	0		3.2.1.52	Carbohydrate metabolism	N
R04591	1-(5-Phosphoribosyl)-5-amino-4-carboxyimidazole:L-aspartate ligase (ADP-forming)	C00002[c] + C04751[c] + C00049[c] <=> C00008[c] + C00009[c] + C04823[c]	(pvm:113828072) or (pvm:113803769)	pvm:113828072;pvm:113803769	rn00230	-1000	1000	0		6.3.2.6	Nucleotide metabolism	Y
R04603	UDP-N-acetyl-D-galactosamine:D-glucuronyl-N-acetyl-1,3-beta-D-galactosaminylproteoglycan beta-1,4-N-acetylgalactosaminyltransferase	C00203[c] + C04800[c] --> C00015[c] + C04913[c]	(pvm:113824940) or (pvm:113826038) or (pvm:113826043) or (pvm:113826061) or (pvm:113826064)	pvm:113824940;pvm:113826038;pvm:113826043;pvm:113826061;pvm:113826064	rn01100	0	1000	0		2.4.1.175	Global and overview maps	N
R04604	Biotin:apo-[3-methylcrotonoyl-CoA:carbon-dioxide ligase (ADP-forming)] ligase (AMP-forming)	C00002[c] + C00120[c] + C04827[c] --> C00020[c] + C00013[c] + C04801[c]	(pvm:113811726)	pvm:113811726	rn00780	0	1000	0		6.3.4.11	Metabolism of cofactors and vitamins	N
R04607	UDPglucuronate:3-beta-D-galactosyl-4-beta-D-galactosyl-O-beta-D-xylosylprotein D-glucuronosyltransferase	C00167[c] + C04825[c] --> C00015[c] + C04903[c]	(pvm:113820163) or (pvm:113820190) or (pvm:113820191) or (pvm:113820194) or (pvm:113821292) or (pvm:113821294) or (pvm:113821298) or (pvm:113821321) or (pvm:113821324)	pvm:113820163;pvm:113820190;pvm:113820191;pvm:113820194;pvm:113821292;pvm:113821294;pvm:113821298;pvm:113821321;pvm:113821324	rn00040	0	1000	0		2.4.1.135	Carbohydrate metabolism	N
R04610	UDPgalactose:N-acetyl-D-glucosaminyl-1,3-D-galactosyl-1,4-D-glucosylceramide beta-D-galactosyltransferase	C00052[c] + C04845[c] --> C00015[c] + C04910[c]	(pvm:113807833) or (pvm:113807841) or (pvm:113807841) or (pvm:113807843) or (pvm:113807852) or (pvm:113808891) or (pvm:113808915) or (pvm:113808955) or (pvm:113808966)	pvm:113807833;pvm:113807841;pvm:113807841;pvm:113807843;pvm:113807852;pvm:113808891;pvm:113808915;pvm:113808955;pvm:113808966	rn00052	0	1000	0		2.4.1.86	Carbohydrate metabolism	N
R04620	7,8-dihydroneopterin-3'-triphosphate phosphohydrolase (alkaline optimum)	C04895[c] + 3 C00001[c] --> C04874[c] + 3 C00009[c]	(pvm:113804641) or (pvm:113804694) or (pvm:113804702) or (pvm:113805774) or (pvm:113805778) or (pvm:113805786) or (pvm:113805787)	pvm:113804641;pvm:113804694;pvm:113804702;pvm:113805774;pvm:113805778;pvm:113805786;pvm:113805787	rn00790	0	1000	0		3.1.3.1	Metabolism of cofactors and vitamins	N
R04631	UDPgalactose:N-acetyl-D-galactosaminyl-(N-acetylneuraminyl)-D-galactosyl-D-glucosyl-N-acylsphingosine beta-1,3-D-galactosyltransferase	C00052[c] + C04884[c] --> C00015[c] + C04911[c]	(pvm:113829323)	pvm:113829323	rn00240	0	1000	0		2.4.1.62	Nucleotide metabolism	N
R04633	D-Galactosyl-N-acetyl-D-galactosaminyl-(N-acetylneuraminyl)-D- galactosyl-D-glucosylceramide galactohydrolase	C04911[c] + C00001[c] --> C04884[c] + C00124[c]	(pvm:113823164)	pvm:113823164	rn01100	0	1000	0		3.2.1.23	Global and overview maps	N
R04639	2-amino-4-hydroxy-6-(erythro-1,2,3-trihydroxypropyl) dihydropteridine triphosphate hydrolase	C04895[c] + C00001[c] --> C06148[c]	(pvm:113814667) or (pvm:113815860) or (pvm:113817190)	pvm:113814667;pvm:113815860;pvm:113817190	rn00790	0	1000	0		3.5.4.16	Metabolism of cofactors and vitamins	N
R04653	UDP-N-acetyl-D-glucosamine:glycoprotein (N-acetyl-D-glucosamine to alpha-D-mannosyl-1,6-(R1)-beta-D-mannosyl-R2) beta-1,2-N-acetyl-D-glucosaminyltransferase	C00043[c] + C04914[c] --> C00015[c] + C04937[c]	(pvm:113821444) or (pvm:113821452)	pvm:113821444;pvm:113821452	rn00240	0	1000	0		2.4.1.143	Nucleotide metabolism	N
R04662	UDP-N-acetyl-D-glucosamine:3-[2-(N-acetyl-beta-D-glucosaminyl)-alpha-D-mannosyl]-glycoprotein 4-beta-N-acetyl-D-glucosaminyltransferase	C00043[c] + C04880[c] --> C00015[c] + C04943[c]	(pvm:113822625)	pvm:113822625	rn00240	0	1000	0		2.4.1.145	Nucleotide metabolism	N
R04666	(R)-3-ureidoisobutyrate amidohydrolase	C21029[c] + C00001[c] --> C01205[c] + C00011[c] + C00014[c]	(pvm:113828695)	pvm:113828695	rn00240	0	1000	0		3.5.1.6	Nucleotide metabolism	N
R04681	Estriol:NAD+ 17-oxidoreductase	C05141[c] + C00003[c] <=> C05300[c] + C00004[c] + C00080[c]	(pvm:113821791) or (pvm:113821820) or (pvm:113822943) or (pvm:113822949) or (pvm:113822950) or (pvm:113822957) or (pvm:113822972) or (pvm:113822976) or (pvm:113822977) or (pvm:113822977) or (pvm:113822979) or (pvm:113824088) or (pvm:113824094)	pvm:113821791;pvm:113821820;pvm:113822943;pvm:113822949;pvm:113822950;pvm:113822957;pvm:113822972;pvm:113822976;pvm:113822977;pvm:113822977;pvm:113822979;pvm:113824088;pvm:113824094	rn00140	-1000	1000	0		1.1.1.62	Lipid metabolism	Y
R04682	Estriol:NADP+ 17-oxidoreductase	C05141[c] + C00006[c] <=> C05300[c] + C00005[c] + C00080[c]	(pvm:113821791) or (pvm:113821820) or (pvm:113822943) or (pvm:113822949) or (pvm:113822950) or (pvm:113822957) or (pvm:113822972) or (pvm:113822976) or (pvm:113822977) or (pvm:113822977) or (pvm:113822979) or (pvm:113824088) or (pvm:113824094)	pvm:113821791;pvm:113821820;pvm:113822943;pvm:113822949;pvm:113822950;pvm:113822957;pvm:113822972;pvm:113822976;pvm:113822977;pvm:113822977;pvm:113822979;pvm:113824088;pvm:113824094	rn00140	-1000	1000	0		1.1.1.62	Lipid metabolism	Y
R04683	UDPglucuronate beta-D-glucuronosyltransferase(acceptor-unspecific)	C00167[c] + C05141[c] --> C00015[c] + C05504[c]	(pvm:113823738) or (pvm:113823745) or (pvm:113823747) or (pvm:113823748) or (pvm:113823750) or (pvm:113823750) or (pvm:113823785) or (pvm:113823789) or (pvm:113823789) or (pvm:113823792) or (pvm:113823795)	pvm:113823738;pvm:113823745;pvm:113823747;pvm:113823748;pvm:113823750;pvm:113823750;pvm:113823785;pvm:113823789;pvm:113823789;pvm:113823792;pvm:113823795	rn00140	0	1000	0		2.4.1.17	Lipid metabolism	N
R04693	Monophenol,L-dopa:oxygen oxidoreductase	C05176[c] + C00007[c] + C00030[c] --> C05202[c] + C00001[c] + C00028[c]	(pvm:113813169)	pvm:113813169	rn00950	0	1000	0		1.14.18.1	Biosynthesis of other secondary metabolites	N
R04734	4a-hydroxytetrahydrobiopterin hydro-lyase	C15522[c] --> C00268[c] + C00001[c]	(pvm:113827918)	pvm:113827918	rn00790	0	1000	0		4.2.1.96	Metabolism of cofactors and vitamins	N
R04742	Decanoyl-CoA:acetyl-CoA C-acyltransferase	C05274[c] + C00024[c] --> C00010[c] + C05263[c]	(pvm:113825167) or (pvm:113825170)	pvm:113825167;pvm:113825170	rn00062	0	1000	0		2.3.1.16	Lipid metabolism	N
R04747	Hexanoyl-CoA:acetyl-CoA C-acyltransferase	C05270[c] + C00024[c] --> C00010[c] + C05267[c]	(pvm:113825167) or (pvm:113825170)	pvm:113825167;pvm:113825170	rn00062	0	1000	0		2.3.1.16	Lipid metabolism	N
R04756	cis,cis-3,6-Dodecadienoyl-CoA delta3-cis-delta2-trans-isomerase	C05280[c] <=> C05279[c]	(pvm:113819216) or (pvm:113820342) or (pvm:113824967) or (pvm:113829507)	pvm:113819216;pvm:113820342;pvm:113824967;pvm:113829507	rn00071	-1000	1000	0		5.3.3.8	Lipid metabolism	Y
R04771	ATP:L-selenomethione S-adenosyltransferase	C00002[c] + C05335[c] + C00001[c] --> C00009[c] + C00013[c] + C05691[c]	(pvm:113802104) or (pvm:113802125)	pvm:113802104;pvm:113802125	rn00450	0	1000	0		2.5.1.6	Metabolism of other amino acids	N
R04773	Selenomethionine:tRNAMet ligase (AMP-forming)	C00002[c] + C05335[c] + C01647[c] --> C00020[c] + C00013[c] + C05336[c]	(pvm:113815924) or (pvm:113819544)	pvm:113815924;pvm:113819544	rn00450	0	1000	0		6.1.1.10	Metabolism of other amino acids	N
R04780	beta-D-Fructose 1,6-bisphosphate 1-phosphohydrolase	C05378[c] + C00001[c] --> C05345[c] + C00009[c]	(pvm:113806992)	pvm:113806992	rn00010	0	1000	0		3.1.3.11	Carbohydrate metabolism	N
R04783	3-Ketolactose galactohydrolase	C05403[c] + C00001[c] --> C05394[c] + C00221[c]	(pvm:113823164)	pvm:113823164	rn00010	0	1000	0		3.2.1.23	Carbohydrate metabolism	N
R04785	L-Dehydroascorbate lactonohydrolase	C05422[c] + C00001[c] --> C04575[c]	(pvm:113828884) or (pvm:113828906) or (pvm:113830003) or (pvm:113830010) or (pvm:113830013) or (pvm:113830017) or (pvm:113830026)	pvm:113828884;pvm:113828906;pvm:113830003;pvm:113830010;pvm:113830013;pvm:113830017;pvm:113830026	rn00053	0	1000	0		3.1.1.17	Carbohydrate metabolism	N
R04805		C05444[c] + C00003[c] --> C05445[c] + C00004[c] + C00080[c]	(pvm:113824313) or (pvm:113806470)	pvm:113824313;pvm:113806470	rn00730	0	1000	0		1.1.1.1	Metabolism of cofactors and vitamins	N
R04811	Propanoyl-CoA:acetyl-CoA C-acyltransferase;	C00100[c] + C05337[c] --> C00010[c] + C05449[c]	(pvm:113825199)	pvm:113825199	rn00120	0	1000	0		2.3.1.176	Lipid metabolism	N
R04858	S-adenosyl-L-methionine:DNA (cytosine-5-)-methyltransferase	C00019[c] + C00856[c] --> C00021[c] + C02967[c]	(pvm:113817093)	pvm:113817093	rn00270	0	1000	0		2.1.1.37	Amino acid metabolism	N
R04880	3,4-dihydroxyphenylethyleneglycol:NAD+ oxidoreductase	C05576[c] + C00003[c] <=> C05577[c] + C00004[c] + C00080[c]	(pvm:113824313) or (pvm:113806470)	pvm:113824313;pvm:113806470	rn00350	-1000	1000	0		1.1.1.1	Amino acid metabolism	Y
R04884	5,6-dihydroxyindole:oxygen oxidoreductase	2 C05578[c] + C00007[c] --> 2 C05579[c] + 2 C00001[c]	(pvm:113813169)	pvm:113813169	rn00350	0	1000	0		1.14.18.1	Amino acid metabolism	N
R04890	3-Methoxytyramine:oxygen oxidoreductase (deaminating) (copper-containing)	C05587[c] + C00001[c] + C00007[c] --> C05581[c] + C00027[c] + C00014[c]	(pvm:113818908)	pvm:113818908	rn00350	0	1000	0		1.4.3.4	Amino acid metabolism	N
R04893	L-Normetanephrine:oxygen oxidoreductase (deaminating) (copper-containing)	C05589[c] + C00001[c] + C00007[c] --> C05583[c] + C00014[c] + C00027[c]	(pvm:113818908)	pvm:113818908	rn00350	0	1000	0		1.4.3.4	Amino acid metabolism	N
R04894	L-Metanephrine:oxygen oxidoreductase (deaminating) (flavin-containing)	C05588[c] + C00001[c] + C00007[c] --> C05583[c] + C00027[c] + C00218[c]	(pvm:113818908)	pvm:113818908	rn00350	0	1000	0		1.4.3.4	Amino acid metabolism	N
R04903	5-Hydroxyindoleacetaldehyde:NAD+ oxidoreductase	C05634[c] + C00003[c] + C00001[c] --> C05635[c] + C00080[c] + C00004[c]	(pvm:113825010) or (pvm:113825013) or (pvm:113826103) or (pvm:113826145) or (pvm:113826151) or (pvm:113826159) or (pvm:113826162) or (pvm:113816548)	pvm:113825010;pvm:113825013;pvm:113826103;pvm:113826145;pvm:113826151;pvm:113826159;pvm:113826162;pvm:113816548	rn00380	0	1000	0		1.2.1.3	Amino acid metabolism	N
R04907	3-Hydroxykynurenamine:oxygen oxidoreductase(deaminating)(flavin-containing)	C05636[c] + C00007[c] --> C05637[c] + C00014[c] + C00027[c]	(pvm:113818908)	pvm:113818908	rn00380	0	1000	0		1.4.3.4	Amino acid metabolism	N
R04908	5-Hydroxykynurenamine:oxygen oxidoreductase(deaminating)(flavin-containing)	C05638[c] + C00001[c] + C00007[c] --> C05639[c] + C00014[c] + C00027[c] + C00001[c]	(pvm:113818908)	pvm:113818908	rn00380	0	1000	0		1.4.3.4	Amino acid metabolism	N
R04909	5-Hydroxykynurenamine decarboxy-lyase	C05638[c] + C00011[c] --> C05651[c]	(pvm:113812953)	pvm:113812953	rn00380	0	1000	0		4.1.1.28	Amino acid metabolism	N
R04920	CMP-2-aminoethylphosphonate:1,2-diacylglycerol (2-aminoethylphosphonyl)transferase	C05673[c] + C00641[c] --> C00055[c] + C05675[c]	(pvm:113824240) or (pvm:113824240) or (pvm:113824281)	pvm:113824240;pvm:113824240;pvm:113824281	rn00440	0	1000	0		2.7.8.1	Metabolism of other amino acids	N
R04922	CMP-N-trimethyl-2-aminoethylphosphonate:1,2-diacylglycerol (N-trimethyl-2-aminoethylphosphonyl)transferase	C05674[c] + C00641[c] --> C00055[c] + C05676[c]	(pvm:113825401)	pvm:113825401	rn00440	0	1000	0		2.7.8.2	Metabolism of other amino acids	N
R04928	ATP:adenylylsulfate 3'-phosphotransferase	C00002[c] + C05686[c] --> C00008[c] + C05696[c]	(pvm:113801064)	pvm:113801064	rn00450	0	1000	0		2.7.1.25	Metabolism of other amino acids	N
R04929	ATP:selenate adenylyltransferase	C00002[c] + C05697[c] --> C00013[c] + C05686[c]	(pvm:113829107)	pvm:113829107	rn00450	0	1000	0		2.7.7.4	Metabolism of other amino acids	N
R04930	Selenocystathionine Lysteine-lyase (deaminating)	C05699[c] + C00001[c] --> C05688[c] + C00014[c] + C00109[c]	(pvm:113829361)	pvm:113829361	rn00450	0	1000	0		4.4.1.1	Metabolism of other amino acids	N
R04935	(5-L-glutamyl)-peptide:Se-Methylselenocysteine 5-glutamyltransferase	C03193[c] + C05689[c] --> C00012[c] + C05695[c]	(pvm:113801114) or (pvm:113801149)	pvm:113801114;pvm:113801149	rn00450	0	1000	0		2.3.2.2	Metabolism of other amino acids	N
R04936	Se-Adenosylselenohomocysteine hydrolase	C05692[c] + C00001[c] --> C00212[c] + C05698[c]	(pvm:113829050) or (pvm:113829057)	pvm:113829050;pvm:113829057	rn01100	0	1000	0		3.3.1.1	Global and overview maps	N
R04941	Selenocystathionine L-homocysteine-lyase (deaminating)	C05699[c] + C00001[c] --> C05698[c] + C00014[c] + C00022[c]	(pvm:113829381)	pvm:113829381	rn00450	0	1000	0		4.4.1.13	Metabolism of other amino acids	N
R04942	L-Serine hydro-lyase (adding homocysteine)	C00065[c] + C05698[c] --> C05699[c] + C00001[c]	(pvm:113818694)	pvm:113818694	rn00260	0	1000	0		4.2.1.22	Amino acid metabolism	N
R04972	Uroporphyrinogen I carboxy-lyase	C05766[c] --> C05768[c] + 4 C00011[c]	(pvm:113815290)	pvm:113815290	rn00860	0	1000	0		4.1.1.37	Metabolism of cofactors and vitamins	N
R04983		C05803[c] + C00019[c] --> C05804[c] + C00021[c]	(pvm:113805339)	pvm:113805339	rn00130	0	1000	0		2.1.1.201	Metabolism of cofactors and vitamins	N
R04984	2-hexaprenyl-3-methyl-6-methoxy-1,4-benzoquinone,acceptor:oxygen oxidoreductase (5-hydroxylating)	C05804[c] + C00030[c] + C00007[c] --> C05805[c] + C00028[c] + C00001[c]	(pvm:113815555) or (pvm:113815556)	pvm:113815555;pvm:113815556	rn00130	0	1000	0		1.14.99.60	Metabolism of cofactors and vitamins	N
R04990	UDP-L-rhamnose:flavonol-3-O-D-glucoside L-rhamnosyltransferase	C05813[c] + C00019[c] --> C05814[c] + C00021[c]	(pvm:113805339)	pvm:113805339	rn00130	0	1000	0		2.1.1.201	Metabolism of cofactors and vitamins	N
R05002	GDPmannose:glycolipid 1,3-alpha-D-mannosyltransferase	C00096[c] + C05860[c] --> C00035[c] + C05861[c]	(pvm:113818983)	pvm:113818983	rn00051	0	1000	0		2.4.1.132	Carbohydrate metabolism	N
R05046	formamidopyrimidine nucleoside triphosphate amidohydrolase	C05922[c] + C00001[c] --> C05923[c] + C00058[c]	(pvm:113814667) or (pvm:113815860) or (pvm:113817190)	pvm:113814667;pvm:113815860;pvm:113817190	rn00790	0	1000	0		3.5.4.16	Metabolism of cofactors and vitamins	N
R05048	2,5-diaminopyrimidine nucleoside triphosphate mutase	C05923[c] --> C06148[c]	(pvm:113814667) or (pvm:113815860) or (pvm:113817190)	pvm:113814667;pvm:113815860;pvm:113817190	rn00790	0	1000	0		3.5.4.16	Metabolism of cofactors and vitamins	N
R05050	N4-Acetylaminobutanal:NAD+ oxidoreductase	C05936[c] + C00003[c] + C00001[c] --> C02946[c] + C00004[c] + C00080[c]	(pvm:113825010) or (pvm:113825013) or (pvm:113826103) or (pvm:113826145) or (pvm:113826151) or (pvm:113826159) or (pvm:113826162) or (pvm:113816548)	pvm:113825010;pvm:113825013;pvm:113826103;pvm:113826145;pvm:113826151;pvm:113826159;pvm:113826162;pvm:113816548	rn00330	0	1000	0		1.2.1.3	Amino acid metabolism	N
R05051	L-erythro-4-Hydroxyglutamate:NAD+ oxidoreductase	C05947[c] + C00004[c] + C00080[c] --> C05938[c] + C00003[c] + C00001[c]	(pvm:113817770)	pvm:113817770	rn00330	0	1000	0		1.2.1.88	Amino acid metabolism	N
R05064	(S)-3-Hydroxyisobutyryl-CoA hydrolase	C06000[c] + C00001[c] --> C00010[c] + C06001[c]	(pvm:113800812) or (pvm:113800830)	pvm:113800812;pvm:113800830	rn00280	0	1000	0		3.1.2.4	Amino acid metabolism	N
R05085	O-Phospho-4-hydroxy-L-threonine:2-oxoglutarate aminotransferase	C06055[c] + C00026[c] <=> C06054[c] + C00025[c]	(pvm:113811237)	pvm:113811237	rn00750	-1000	1000	0		2.6.1.52	Metabolism of cofactors and vitamins	Y
R05102	NADPH:cytochrome-P-450 oxidoreductase	C06109[c] + C00005[c] --> C06110[c] + C00006[c] + C00080[c]	(pvm:113827174)	pvm:113827174	rn00480	0	1000	0		1.6.2.4	Metabolism of other amino acids	N
R05105	3'-Phosphoadenylylsulfate:digalactosylceramide 3'-sulfotransferase	C00053[c] + C06126[c] --> C00054[c] + C06127[c]	(pvm:113823251) or (pvm:113824400) or (pvm:113824408) or (pvm:113824411) or (pvm:113824411) or (pvm:113824415) or (pvm:113824423) or (pvm:113824427)	pvm:113823251;pvm:113824400;pvm:113824408;pvm:113824411;pvm:113824411;pvm:113824415;pvm:113824423;pvm:113824427	rn00600	0	1000	0		2.8.2.11	Lipid metabolism	N
R05110		C00052[c] + C06134[c] --> C00015[c] + C06141[c]	(pvm:113829323)	pvm:113829323	rn00240	0	1000	0		2.4.1.62	Nucleotide metabolism	N
R05111		C00052[c] + C06135[c] --> C00015[c] + C06136[c]	(pvm:113829323)	pvm:113829323	rn00240	0	1000	0		2.4.1.62	Nucleotide metabolism	N
R05112	Gal-beta1->3GalNAc-beta1->4Gal-beta1->4Glc-beta1->1'Cer galactohydrolase	C06136[c] + C00001[c] --> C06135[c] + C00124[c]	(pvm:113823164)	pvm:113823164	rn00052	0	1000	0		3.2.1.23	Carbohydrate metabolism	N
R05144	peptidyl-glutamate 4-carboxylase (2-methyl-3-phytyl-1,4-naphthoquinone-epoxidizing)	C06246[c] + C05849[c] + C00001[c] --> C06247[c] + C03313[c] + C00011[c] + C00007[c]	(pvm:113820150)	pvm:113820150	rn00130	0	1000	0		4.1.1.90	Metabolism of cofactors and vitamins	N
R05168	N-acetyl-D-galactosamine 6-phosphate amidohydrolase	C06376[c] + C00001[c] --> C06377[c] + C00033[c]	(pvm:113825233)	pvm:113825233	rn00052	0	1000	0		3.5.1.25	Carbohydrate metabolism	N
R05182	[methionine synthase]-methylcob(I)alamin,S-adenosylhomocysteine:NADP+ oxidoreductase	2 C00019[c] + 2 C06409[c] + C00005[c] + C00080[c] --> 2 C06410[c] + 2 C00021[c] + C00006[c]	(pvm:113816903)	pvm:113816903	rn00480	0	1000	0		1.16.1.8	Metabolism of other amino acids	N
R05220	ATP:cob(I)yrinic acid-a,c-diamide Cobeta-adenosyltransferase	C06505[c] + C00002[c] + C00080[c] --> C06506[c] + C00536[c]	(pvm:113825319)	pvm:113825319	rn00860	0	1000	0		2.5.1.17	Metabolism of cofactors and vitamins	N
R05231	6-Hydroxyhexanoate:NADP+ oxidoreductase	C06103[c] + C00006[c] --> C06102[c] + C00005[c] + C00080[c]	(pvm:113814757) or (pvm:113807228) or (pvm:113802019) or (pvm:113815250) or (pvm:113800163)	pvm:113814757;pvm:113807228;pvm:113802019;pvm:113815250;pvm:113800163	rn00930	0	1000	0		1.1.1.2	Xenobiotics biodegradation and metabolism	N
R05233	trans-3-Chloro-2-propene-1-ol:NAD+ oxidoreductase	C06611[c] + C00003[c] --> C06613[c] + C00004[c] + C00080[c]	(pvm:113824313) or (pvm:113806470)	pvm:113824313;pvm:113806470	rn00625	0	1000	0		1.1.1.1	Xenobiotics biodegradation and metabolism	N
R05234	cis-3-chloro-2-propene-1-ol:NAD+ oxidoreductase	C06612[c] + C00003[c] --> C16348[c] + C00004[c] + C00080[c]	(pvm:113824313) or (pvm:113806470)	pvm:113824313;pvm:113806470	rn00625	0	1000	0		1.1.1.1	Xenobiotics biodegradation and metabolism	N
R05237		C06613[c] + C00001[c] --> C06614[c] + 2 C00080[c]	(pvm:113825010) or (pvm:113825013) or (pvm:113826103) or (pvm:113826145) or (pvm:113826151) or (pvm:113826159) or (pvm:113826162) or (pvm:113816548)	pvm:113825010;pvm:113825013;pvm:113826103;pvm:113826145;pvm:113826151;pvm:113826159;pvm:113826162;pvm:113816548	rn00625	0	1000	0		1.2.1.3	Xenobiotics biodegradation and metabolism	N
R05238		C16348[c] + C00001[c] --> C06615[c] + 2 C00080[c]	(pvm:113825010) or (pvm:113825013) or (pvm:113826103) or (pvm:113826145) or (pvm:113826151) or (pvm:113826159) or (pvm:113826162) or (pvm:113816548)	pvm:113825010;pvm:113825013;pvm:113826103;pvm:113826145;pvm:113826151;pvm:113826159;pvm:113826162;pvm:113816548	rn00625	0	1000	0		1.2.1.3	Xenobiotics biodegradation and metabolism	N
R05259	parathion,NADPH---hemoprotein reductase:oxygen oxidoreductase (paraoxon-forming)	C06604[c] + C03024[c] + C00007[c] --> C06606[c] + C03161[c] + C00087[c] + C00001[c]	(pvm:113829697) or (pvm:113801218) or (pvm:113802729) or (pvm:113802766) or (pvm:113803893) or (pvm:113803906) or (pvm:113803903) or (pvm:113803928) or (pvm:113805029) or (pvm:113805029) or (pvm:113805053)	pvm:113829697;pvm:113801218;pvm:113802729;pvm:113802766;pvm:113803893;pvm:113803906;pvm:113803903;pvm:113803928;pvm:113805029;pvm:113805029;pvm:113805053	rn00627	0	1000	0		1.14.14.1	Xenobiotics biodegradation and metabolism	N
R05286	Chloroacetaldehyde:NAD+ oxidoreductase	C06754[c] + C00003[c] + C00001[c] --> C06755[c] + C00004[c] + C00080[c]	(pvm:113825010) or (pvm:113825013) or (pvm:113826103) or (pvm:113826145) or (pvm:113826151) or (pvm:113826159) or (pvm:113826162) or (pvm:113816548)	pvm:113825010;pvm:113825013;pvm:113826103;pvm:113826145;pvm:113826151;pvm:113826159;pvm:113826162;pvm:113816548	rn00625	0	1000	0		1.2.1.3	Xenobiotics biodegradation and metabolism	N
R05329	Spermidine:eIF5A-lysine 4-aminobutyltransferase (propane-1,3-diamine-forming)	C07281[c] + C00315[c] --> C07282[c] + C00986[c]	(pvm:113800480)	pvm:113800480	rn00330	0	1000	0		2.5.1.46	Amino acid metabolism	N
R05330	4,8,12-trimethyltridecanoyl-CoA:propanoyl-CoA C2-4,8,12-trimethyltridecanoyltransferase	C07296[c] + C00100[c] --> C07297[c] + C00010[c]	(pvm:113825199)	pvm:113825199	rn00071	0	1000	0		2.3.1.176	Lipid metabolism	N
R05373	methylmalonyl-CoA carboxy-lyase	C02557[c] --> C00100[c] + C00011[c]	(pvm:113817850)	pvm:113817850	rn00280	0	1000	0		4.1.1.9	Amino acid metabolism	N
R05575	(3S)-3-Hydroxyacyl-CoA:NAD+ oxidoreductase	C09819[c] + C00003[c] --> C09820[c] + C00004[c] + C00080[c]	(pvm:113813321) or (pvm:113814456)	pvm:113813321;pvm:113814456	rn00623	0	1000	0		1.1.1.35	Xenobiotics biodegradation and metabolism	N
R05586		C06715[c] + C00010[c] --> C00527[c] + C00024[c]	(pvm:113825167) or (pvm:113825170)	pvm:113825167;pvm:113825170	rn00362	0	1000	0		2.3.1.16	Xenobiotics biodegradation and metabolism	N
R05595		C00877[c] + C00001[c] --> C05116[c]	(pvm:113813772) or (pvm:113813772)	pvm:113813772;pvm:113813772	rn00071	0	1000	0		4.2.1.17	Lipid metabolism	N
R05615	all-trans-octaprenyl-diphosphate:4-hydroxybenzoate 3-octaprenyltransferase	C04146[c] + C00156[c] --> C05809[c] + C00013[c]	(pvm:5333210) or (pvm:113800453)	pvm:5333210;pvm:113800453	rn00130	0	1000	0		2.5.1.39	Metabolism of cofactors and vitamins	N
R05616	all-trans-hexaprenyl diphosphate:4-hydroxybenzoate hexaprenyltransferase	C01230[c] + C00156[c] --> C13425[c] + C00013[c]	(pvm:5333210) or (pvm:113800453)	pvm:5333210;pvm:113800453	rn00130	0	1000	0		2.5.1.39	Metabolism of cofactors and vitamins	N
R05618	chlorophyll chlorophyllidohydrolase	C05306[c] + C00001[c] --> C02139[c] + C01389[c]	(pvm:113828882)	pvm:113828882	rn00860	0	1000	0		3.1.1.14	Metabolism of cofactors and vitamins	N
R05635	Formyl-L-methionyl peptide amidohydrolase	C11439[c] + C00001[c] --> C11440[c] + C00058[c]	(pvm:113802076)	pvm:113802076	rn01100	0	1000	0		3.5.1.88	Global and overview maps	N
R05639	4,4-dimethyl-5a-cholesta-8,24-dien-3b-ol:NADP+ D14-oxidoreductase	C05108[c] + C00006[c] --> C11455[c] + C00005[c] + C00080[c]	(pvm:113819078)	pvm:113819078	rn00100	0	1000	0		1.3.1.70	Lipid metabolism	N
R05691	lophenol:NADP+ 3-oxidoreductase	C08825[c] + C00006[c] --> C04453[c] + C00005[c] + C00080[c]	(pvm:113805268) or (pvm:113805292)	pvm:113805268;pvm:113805292	rn00480	0	1000	0		1.1.1.270	Metabolism of other amino acids	N
R05692	GDP-L-fucose:NADP+ 4-oxidoreductase (3,5-epimerizing)	C00325[c] + C00006[c] <=> C01222[c] + C00005[c] + C00080[c]	(pvm:113805306)	pvm:113805306	rn00051	-1000	1000	0		1.1.1.271	Carbohydrate metabolism	Y
R05703	lanosterol D24-reductase	C01189[c] + C00006[c] <=> C05439[c] + C00005[c] + C00080[c]	(pvm:113820205) or (pvm:113820218)	pvm:113820205;pvm:113820218	rn00100	-1000	1000	0		1.3.1.72	Lipid metabolism	Y
R05722	phytanoyl-CoA, 2-oxoglutarate:oxygen oxidoreductase (2-hydroxylating)	C02060[c] + C00026[c] + C00007[c] --> C07343[c] + C00042[c] + C00011[c]	(pvm:113820584) or (pvm:113820582)	pvm:113820584;pvm:113820582	rn01100	0	1000	0		1.14.11.18	Global and overview maps	N
R05777	diphospho-myo-inositol-polyphosphate diphosphohydrolase	C11524[c] + C00001[c] --> C11525[c] + C00009[c]	(pvm:113821879) or (pvm:113823026)	pvm:113821879;pvm:113823026	rn01100	0	1000	0		3.6.1.52	Global and overview maps	N
R05779	5-Diphosphoinositol pentakisphosphate diphosphohydrolase	C11526[c] + C00001[c] --> C01204[c] + C00009[c]	(pvm:113821879) or (pvm:113823026)	pvm:113821879;pvm:113823026	rn00562	0	1000	0		3.6.1.52	Carbohydrate metabolism	N
R05795	ATP:1-phosphatidyl-1D-myo-inositol-4-phosphate 3-phosphotransferase	C00002[c] + C01277[c] --> C00008[c] + C11554[c]	(pvm:113820657)	pvm:113820657	rn00562	0	1000	0		2.7.1.154	Carbohydrate metabolism	N
R05799	ATP:1D-myo-inositol-hexakisphosphate phosphotransferase	C00002[c] + C01204[c] --> C00008[c] + C11174[c]	(pvm:113819943) or (pvm:113819961)	pvm:113819943;pvm:113819961	rn04070	0	1000	0		2.7.4.24		N
R05802	ATP:1-phosphatidyl-1D-myo-inositol-3-phosphate 5-phosphotransferase	C00002[c] + C04549[c] --> C00008[c] + C11556[c]	(pvm:113818305)	pvm:113818305	rn00562	0	1000	0		2.7.1.150	Carbohydrate metabolism	N
R05803	ATP:1-phosphatidyl-1D-myo-inositol-5-phosphate 4-phosphotransferase	C00002[c] + C11557[c] --> C00008[c] + C04637[c]	(pvm:113818300)	pvm:113818300	rn00562	0	1000	0		2.7.1.149	Carbohydrate metabolism	N
R05806	ATP:deoxynucleoside 5'-phosphotransferase	C00002[c] + C02269[c] --> C00008[c] + C00676[c]	(pvm:113817198) or (pvm:113817203)	pvm:113817198;pvm:113817203	rn00230	0	1000	0		2.7.1.145	Nucleotide metabolism	N
R05907		G10611[c] + C02189[c] --> G10619[c] + G00023[c]	(pvm:113823577) or (pvm:113823632) or (pvm:113824789) or (pvm:113825898) or (pvm:113825904) or (pvm:113825910) or (pvm:113825929) or (pvm:113825942) or (pvm:113825947) or (pvm:113825944) or (pvm:113825951) or (pvm:113828236)	pvm:113823577;pvm:113823632;pvm:113824789;pvm:113825898;pvm:113825904;pvm:113825910;pvm:113825929;pvm:113825942;pvm:113825947;pvm:113825944;pvm:113825951;pvm:113828236	rn00512	0	1000	0		2.4.1.41	Glycan biosynthesis and metabolism	N
R05908		G10609[c] + G00023[c] --> G10619[c] + G00024[c]	(pvm:113815341) or (pvm:113815342) or (pvm:113816616) or (pvm:113816625) or (pvm:113816633) or (pvm:113816640) or (pvm:113816662) or (pvm:113817809) or (pvm:113817819) or (pvm:113817827) or (pvm:113817837) or (pvm:113818941) or (pvm:113818950) or (pvm:113818954) or (pvm:113818957)	pvm:113815341;pvm:113815342;pvm:113816616;pvm:113816625;pvm:113816633;pvm:113816640;pvm:113816662;pvm:113817809;pvm:113817819;pvm:113817827;pvm:113817837;pvm:113818941;pvm:113818950;pvm:113818954;pvm:113818957	rn00512	0	1000	0		2.4.1.122	Glycan biosynthesis and metabolism	N
R05909		G10610[c] + G00023[c] --> G10619[c] + G00028[c]	(pvm:113822635)	pvm:113822635	rn00512	0	1000	0		2.4.1.147	Glycan biosynthesis and metabolism	N
R05916		G10610[c] + C01194[c] --> G10619[c] + G00143[c]	(pvm:113826097)	pvm:113826097	rn00563	0	1000	0		2.4.1.198	Glycan biosynthesis and metabolism	N
R05917		G00143[c] + C00001[c] --> G00144[c] + C00033[c]	(pvm:113805444)	pvm:113805444	rn00563	0	1000	0		3.5.1.89	Glycan biosynthesis and metabolism	N
R05926		G10609[c] + G00154[c] --> G10619[c] + G00155[c]	(pvm:113820149)	pvm:113820149	rn00532	0	1000	0		2.4.1.133	Glycan biosynthesis and metabolism	N
R05927		G10609[c] + G00155[c] --> G10619[c] + G00156[c]	(pvm:113820159) or (pvm:113820162)	pvm:113820159;pvm:113820162	rn00532	0	1000	0		2.4.1.134	Glycan biosynthesis and metabolism	N
R05928		G10612[c] + G00156[c] --> G10619[c] + G00157[c]	(pvm:113820163) or (pvm:113820190) or (pvm:113820191) or (pvm:113820194) or (pvm:113821292) or (pvm:113821294) or (pvm:113821298) or (pvm:113821321) or (pvm:113821324)	pvm:113820163;pvm:113820190;pvm:113820191;pvm:113820194;pvm:113821292;pvm:113821294;pvm:113821298;pvm:113821321;pvm:113821324	rn00532	0	1000	0		2.4.1.135	Glycan biosynthesis and metabolism	N
R05929		G10611[c] + G00157[c] --> G10619[c] + G00158[c]	(pvm:113824913) or (pvm:113824921) or (pvm:113824926) or (pvm:113824924)	pvm:113824913;pvm:113824921;pvm:113824926;pvm:113824924	rn00532	0	1000	0		2.4.1.174	Glycan biosynthesis and metabolism	N
R05930		G10610[c] + G00157[c] --> G10619[c] + G00162[c]	(pvm:113828399)	pvm:113828399	rn00534	0	1000	0		2.4.1.223	Glycan biosynthesis and metabolism	N
R05931		G10612[c] + G00158[c] --> G10619[c] + G00159[c]	(pvm:113830594)	pvm:113830594	rn00532	0	1000	0		2.4.1.226	Glycan biosynthesis and metabolism	N
R05932		G10611[c] + G00159[c] --> G10619[c] + G00160[c]	(pvm:113824940) or (pvm:113826038) or (pvm:113826043) or (pvm:113826061) or (pvm:113826064)	pvm:113824940;pvm:113826038;pvm:113826043;pvm:113826061;pvm:113826064	rn00532	0	1000	0		2.4.1.175	Glycan biosynthesis and metabolism	N
R05933		G10612[c] + G00160[c] --> G10619[c] + G00180[c]	(pvm:113830594)	pvm:113830594	rn01100	0	1000	0		2.4.1.226	Global and overview maps	N
R05934		G10611[c] + G00180[c] --> G10619[c] + G00161[c]	(pvm:113824940) or (pvm:113826038) or (pvm:113826043) or (pvm:113826061) or (pvm:113826064)	pvm:113824940;pvm:113826038;pvm:113826043;pvm:113826061;pvm:113826064	rn01100	0	1000	0		2.4.1.175	Global and overview maps	N
R05935		G10612[c] + G00162[c] --> G10619[c] + G00163[c]	(pvm:113829491) or (pvm:113829491) or (pvm:113829491)	pvm:113829491;pvm:113829491;pvm:113829491	rn00534	0	1000	0		2.4.1.225	Glycan biosynthesis and metabolism	N
R05936		G10610[c] + G00163[c] --> G10619[c] + G00164[c]	(pvm:113829446) or (pvm:113829448) or (pvm:113829459) or (pvm:113829479)	pvm:113829446;pvm:113829448;pvm:113829459;pvm:113829479	rn00534	0	1000	0		2.4.1.224	Glycan biosynthesis and metabolism	N
R05941		G10609[c] + G00109[c] --> G10619[c] + G00110[c]	(pvm:113829323)	pvm:113829323	rn00604	0	1000	0		2.4.1.62	Glycan biosynthesis and metabolism	N
R05948		G10609[c] + G00114[c] --> G10619[c] + G00115[c]	(pvm:113829323)	pvm:113829323	rn00604	0	1000	0		2.4.1.62	Glycan biosynthesis and metabolism	N
R05953		G10609[c] + G00119[c] --> G10619[c] + G00120[c]	(pvm:113829323)	pvm:113829323	rn00604	0	1000	0		2.4.1.62	Glycan biosynthesis and metabolism	N
R05956		G10609[c] + G00123[c] --> G10619[c] + G00124[c]	(pvm:113829323)	pvm:113829323	rn00604	0	1000	0		2.4.1.62	Glycan biosynthesis and metabolism	N
R05960		G10609[c] + G00092[c] <=> G10619[c] + G00093[c]	(pvm:113830596) or (pvm:113830619) or (pvm:113800507) or (pvm:113800518) or (pvm:113800518) or (pvm:113800521) or (pvm:113800528) or (pvm:113800540) or (pvm:113800548) or (pvm:113800549)	pvm:113830596;pvm:113830619;pvm:113800507;pvm:113800518;pvm:113800518;pvm:113800521;pvm:113800528;pvm:113800540;pvm:113800548;pvm:113800549	rn00603	-1000	1000	0		2.4.1.228	Glycan biosynthesis and metabolism	Y
R05963		C00001[c] + G00094[c] <=> C01132[c] + G00093[c]	(pvm:113823303) or (pvm:113823305) or (pvm:113823305) or (pvm:113823306) or (pvm:113823306) or (pvm:113823307) or (pvm:113823307) or (pvm:113823330) or (pvm:113823358) or (pvm:113824451) or (pvm:113824467)	pvm:113823303;pvm:113823305;pvm:113823305;pvm:113823306;pvm:113823306;pvm:113823307;pvm:113823307;pvm:113823330;pvm:113823358;pvm:113824451;pvm:113824467	rn00603	-1000	1000	0		3.2.1.52	Glycan biosynthesis and metabolism	Y
R05966		C00001[c] + G00095[c] <=> C01132[c] + G00094[c]	(pvm:113827826) or (pvm:113827838)	pvm:113827826;pvm:113827838	rn00603	-1000	1000	0		3.2.1.49	Glycan biosynthesis and metabolism	Y
R05968		G10615[c] + G00097[c] <=> G10620[c] + G00099[c]	(pvm:113806643) or (pvm:113806645) or (pvm:113806645) or (pvm:113806668) or (pvm:113806669)	pvm:113806643;pvm:113806645;pvm:113806645;pvm:113806668;pvm:113806669	rn00603	-1000	1000	0		2.4.1.69	Glycan biosynthesis and metabolism	Y
R05969	UDP-N-acetyl-D-glucosamine:dolichyl-phosphate N-acetyl-D-glucosamine phosphotransferase	C00043[c] + C00110[c] --> C00105[c] + G00001[c]	(pvm:113824291)	pvm:113824291	rn00510	0	1000	0		2.7.8.15	Glycan biosynthesis and metabolism	N
R05970		G10610[c] + G00001[c] --> G10619[c] + G00002[c]	(pvm:113822429) or (pvm:113822429) or (pvm:113821440)	pvm:113822429;pvm:113822429;pvm:113821440	rn00510	0	1000	0		2.4.1.141	Glycan biosynthesis and metabolism	N
R05972		G10614[c] + G00002[c] --> G10620[c] + G00003[c]	(pvm:113821442)	pvm:113821442	rn00510	0	1000	0		2.4.1.142	Glycan biosynthesis and metabolism	N
R05973		G10614[c] + G00003[c] --> G10620[c] + G00004[c]	(pvm:113818983)	pvm:113818983	rn00510	0	1000	0		2.4.1.132	Glycan biosynthesis and metabolism	N
R05976		C03021[c] + G00008[c] --> C00621[c] + G00009[c]	(pvm:113820737) or (pvm:113820745) or (pvm:113820748)	pvm:113820737;pvm:113820745;pvm:113820748	rn00510	0	1000	0		2.4.99.18	Glycan biosynthesis and metabolism	N
R05979		C00001[c] + G00009[c] --> C00221[c] + G00171[c]	(pvm:113829195)	pvm:113829195	rn00510	0	1000	0		3.2.1.106	Glycan biosynthesis and metabolism	N
R05980	Glc2Man9GlcNAc2-[protein] 3-alpha-glucohydrolase (configuration-inverting)	C00001[c] + G00171[c] --> C00267[c] + G00010[c]	(pvm:113822055)	pvm:113822055	rn00510	0	1000	0		3.2.1.207	Glycan biosynthesis and metabolism	N
R05981	GlcMan9GlcNAc2-[protein] 3-alpha-glucohydrolase (configuration-inverting)	C00001[c] + G00010[c] --> C00267[c] + G00011[c]	(pvm:113822055)	pvm:113822055	rn00510	0	1000	0		3.2.1.207	Glycan biosynthesis and metabolism	N
R05983		G10610[c] + G00012[c] --> G10619[c] + G00013[c]	(pvm:113812980) or (pvm:113812983)	pvm:113812980;pvm:113812983	rn00510	0	1000	0		2.4.1.101	Glycan biosynthesis and metabolism	N
R05984		G00013[c] + 2 C00001[c] --> G00014[c] + 2 C00936[c]	(pvm:113829221)	pvm:113829221	rn00510	0	1000	0		3.2.1.114	Glycan biosynthesis and metabolism	N
R05985		G10610[c] + G00014[c] --> G10619[c] + G00015[c]	(pvm:113821444) or (pvm:113821452)	pvm:113821444;pvm:113821452	rn00510	0	1000	0		2.4.1.143	Glycan biosynthesis and metabolism	N
R05986		G10610[c] + G00015[c] --> G10619[c] + G00019[c]	(pvm:113821467) or (pvm:113822604)	pvm:113821467;pvm:113822604	rn00510	0	1000	0		2.4.1.144	Glycan biosynthesis and metabolism	N
R05987		G10610[c] + G00015[c] --> G10619[c] + G00020[c]	(pvm:113822625)	pvm:113822625	rn00510	0	1000	0		2.4.1.145	Glycan biosynthesis and metabolism	N
R05988		G10615[c] + G00015[c] --> G10620[c] + G00016[c]	(pvm:113829327) or (pvm:113829328) or (pvm:113830463) or (pvm:113830466) or (pvm:113830466) or (pvm:113803268) or (pvm:113803273) or (pvm:113804373) or (pvm:113804383) or (pvm:113804403) or (pvm:113805464) or (pvm:113805477) or (pvm:113805489) or (pvm:113805490) or (pvm:113805507)	pvm:113829327;pvm:113829328;pvm:113830463;pvm:113830466;pvm:113830466;pvm:113803268;pvm:113803273;pvm:113804373;pvm:113804383;pvm:113804403;pvm:113805464;pvm:113805477;pvm:113805489;pvm:113805490;pvm:113805507	rn00510	0	1000	0		2.4.1.68	Glycan biosynthesis and metabolism	N
R05989	UDP-galactose:N-acetyl-beta-D-glucosaminylglycopeptide beta-1,4-galactosyltransferase	2 G10609[c] + G00016[c] --> 2 G10619[c] + G00017[c]	(pvm:113823591) or (pvm:113823596) or (pvm:113823598) or (pvm:113823599) or (pvm:113823603) or (pvm:113823604)	pvm:113823591;pvm:113823596;pvm:113823598;pvm:113823599;pvm:113823603;pvm:113823604	rn00510	0	1000	0		2.4.1.38	Glycan biosynthesis and metabolism	N
R05994		G00124[c] + C00001[c] --> G00123[c] + C00124[c]	(pvm:113823164)	pvm:113823164	rn00052	0	1000	0		3.2.1.23	Carbohydrate metabolism	N
R06001		G00123[c] + C00001[c] --> G00092[c] + C01132[c]	(pvm:113823303) or (pvm:113823305) or (pvm:113823305) or (pvm:113823306) or (pvm:113823306) or (pvm:113823307) or (pvm:113823307) or (pvm:113823330) or (pvm:113823358) or (pvm:113824451) or (pvm:113824467)	pvm:113823303;pvm:113823305;pvm:113823305;pvm:113823306;pvm:113823306;pvm:113823307;pvm:113823307;pvm:113823330;pvm:113823358;pvm:113824451;pvm:113824467	rn00052	0	1000	0		3.2.1.52	Carbohydrate metabolism	N
R06004		G00109[c] + C00001[c] --> G00108[c] + C01132[c]	(pvm:113823303) or (pvm:113823305) or (pvm:113823305) or (pvm:113823306) or (pvm:113823306) or (pvm:113823307) or (pvm:113823307) or (pvm:113823330) or (pvm:113823358) or (pvm:113824451) or (pvm:113824467)	pvm:113823303;pvm:113823305;pvm:113823305;pvm:113823306;pvm:113823306;pvm:113823307;pvm:113823307;pvm:113823330;pvm:113823358;pvm:113824451;pvm:113824467	rn00604	0	1000	0		3.2.1.52	Glycan biosynthesis and metabolism	N
R06006		G10609[c] + G00036[c] --> G10619[c] + G00037[c]	(pvm:113807833) or (pvm:113807841) or (pvm:113807841) or (pvm:113807843) or (pvm:113807852) or (pvm:113808891) or (pvm:113808915) or (pvm:113808955) or (pvm:113808966)	pvm:113807833;pvm:113807841;pvm:113807841;pvm:113807843;pvm:113807852;pvm:113808891;pvm:113808915;pvm:113808955;pvm:113808966	rn00601	0	1000	0		2.4.1.86	Glycan biosynthesis and metabolism	N
R06010		G00110[c] + C00001[c] --> G00109[c] + C00124[c]	(pvm:113823164)	pvm:113823164	rn00604	0	1000	0		3.2.1.23	Glycan biosynthesis and metabolism	N
R06015		G10615[c] + G00015[c] --> G10620[c] + G00178[c]	(pvm:113826070) or (pvm:113827196) or (pvm:113827199) or (pvm:113827210)	pvm:113826070;pvm:113827196;pvm:113827199;pvm:113827210	rn01100	0	1000	0		2.4.1.214	Global and overview maps	N
R06024		G10615[c] + G00050[c] --> G10620[c] + G00055[c]	(pvm:113806643) or (pvm:113806645) or (pvm:113806645) or (pvm:113806668) or (pvm:113806669)	pvm:113806643;pvm:113806645;pvm:113806645;pvm:113806668;pvm:113806669	rn00601	0	1000	0		2.4.1.69	Glycan biosynthesis and metabolism	N
R06031		G10615[c] + G00057[c] --> G10620[c] + G00058[c]	(pvm:113806643) or (pvm:113806645) or (pvm:113806645) or (pvm:113806668) or (pvm:113806669)	pvm:113806643;pvm:113806645;pvm:113806645;pvm:113806668;pvm:113806669	rn00601	0	1000	0		2.4.1.69	Glycan biosynthesis and metabolism	N
R06035		G10615[c] + G00067[c] --> G10620[c] + G00071[c]	(pvm:113806643) or (pvm:113806645) or (pvm:113806645) or (pvm:113806668) or (pvm:113806669)	pvm:113806643;pvm:113806645;pvm:113806645;pvm:113806668;pvm:113806669	rn00601	0	1000	0		2.4.1.69	Glycan biosynthesis and metabolism	N
R06041		G10615[c] + G00073[c] --> G10620[c] + G00074[c]	(pvm:113806643) or (pvm:113806645) or (pvm:113806645) or (pvm:113806668) or (pvm:113806669)	pvm:113806643;pvm:113806645;pvm:113806645;pvm:113806668;pvm:113806669	rn00601	0	1000	0		2.4.1.69	Glycan biosynthesis and metabolism	N
R06085		G10615[c] + G00078[c] --> G10620[c] + G04561[c]	(pvm:113806643) or (pvm:113806645) or (pvm:113806645) or (pvm:113806668) or (pvm:113806669)	pvm:113806643;pvm:113806645;pvm:113806645;pvm:113806668;pvm:113806669	rn00601	0	1000	0		2.4.1.69	Glycan biosynthesis and metabolism	N
R06086		G10615[c] + G04561[c] --> G10620[c] + G00079[c]	(pvm:113806643) or (pvm:113806645) or (pvm:113806645) or (pvm:113806668) or (pvm:113806669)	pvm:113806643;pvm:113806645;pvm:113806645;pvm:113806668;pvm:113806669	rn00601	0	1000	0		2.4.1.69	Glycan biosynthesis and metabolism	N
R06089		G10615[c] + G00078[c] --> G10620[c] + G10511[c]	(pvm:113806643) or (pvm:113806645) or (pvm:113806645) or (pvm:113806668) or (pvm:113806669)	pvm:113806643;pvm:113806645;pvm:113806645;pvm:113806668;pvm:113806669	rn00601	0	1000	0		2.4.1.69	Glycan biosynthesis and metabolism	N
R06090		G10615[c] + G10511[c] --> G10620[c] + G00079[c]	(pvm:113806643) or (pvm:113806645) or (pvm:113806645) or (pvm:113806668) or (pvm:113806669)	pvm:113806643;pvm:113806645;pvm:113806645;pvm:113806668;pvm:113806669	rn00601	0	1000	0		2.4.1.69	Glycan biosynthesis and metabolism	N
R06099		G00092[c] + C00001[c] --> G10238[c] + C00124[c]	(pvm:113823164)	pvm:113823164	rn00052	0	1000	0		3.2.1.23	Carbohydrate metabolism	N
R06127	GDP-mannose:glycolipid 1,2-alpha-D-mannosyltransferase	G00005[c] + G10614[c] --> G10526[c] + G10620[c]	(pvm:113818958)	pvm:113818958	rn00510	0	1000	0		2.4.1.131	Glycan biosynthesis and metabolism	N
R06128	GDP-mannose:glycolipid 1,2-alpha-D-mannosyltransferase	G10526[c] + G10614[c] --> G00006[c] + G10620[c]	(pvm:113818958)	pvm:113818958	rn00510	0	1000	0		2.4.1.131	Glycan biosynthesis and metabolism	N
R06141		G10336[c] + C00001[c] --> 2 C00140[c]	(pvm:113823303) or (pvm:113823305) or (pvm:113823305) or (pvm:113823306) or (pvm:113823306) or (pvm:113823307) or (pvm:113823307) or (pvm:113823330) or (pvm:113823358) or (pvm:113824451) or (pvm:113824467)	pvm:113823303;pvm:113823305;pvm:113823305;pvm:113823306;pvm:113823306;pvm:113823307;pvm:113823307;pvm:113823330;pvm:113823358;pvm:113824451;pvm:113824467	rn01100	0	1000	0		3.2.1.52	Global and overview maps	N
R06144		G10531[c] + C00001[c] --> C05394[c] + C00221[c]	(pvm:113823164)	pvm:113823164	rn00010	0	1000	0		3.2.1.23	Carbohydrate metabolism	N
R06146	2-octaprenyl-3-methyl-6-methoxy-1,4-benzoquinone,acceptor:oxygen oxidoreductase (5-hydroxylating)	C05814[c] + C00030[c] + C00007[c] --> C05815[c] + C00028[c] + C00001[c]	(pvm:113815555) or (pvm:113815556)	pvm:113815555;pvm:113815556	rn00130	0	1000	0		1.14.99.60	Metabolism of cofactors and vitamins	N
R06156		G10615[c] + G00037[c] --> G10620[c] + G00044[c]	(pvm:113806643) or (pvm:113806645) or (pvm:113806645) or (pvm:113806668) or (pvm:113806669)	pvm:113806643;pvm:113806645;pvm:113806645;pvm:113806668;pvm:113806669	rn00601	0	1000	0		2.4.1.69	Glycan biosynthesis and metabolism	N
R06170	Galactoside alpha-1,2-L-fucosyltransferase	G10615[c] + G00038[c] --> G10620[c] + G00039[c]	(pvm:113806643) or (pvm:113806645) or (pvm:113806645) or (pvm:113806668) or (pvm:113806669)	pvm:113806643;pvm:113806645;pvm:113806645;pvm:113806668;pvm:113806669	rn00601	0	1000	0		2.4.1.69	Glycan biosynthesis and metabolism	N
R06238	GDP-D-mannose:D-Man-alpha-(1->3)-D-Man-beta-(1->4)-D-GlcNAc-beta-(1->4)-D-GlcNAc-diphosphodolichol alpha-6-mannosyltransferase	G10614[c] + G00004[c] --> G10620[c] + G00005[c]	(pvm:113802162)	pvm:113802162	rn00510	0	1000	0		2.4.1.257	Glycan biosynthesis and metabolism	N
R06258		G10617[c] + G00006[c] --> G10622[c] + G10595[c]	(pvm:113802168)	pvm:113802168	rn00510	0	1000	0		2.4.1.258	Glycan biosynthesis and metabolism	N
R06259		G10617[c] + G10595[c] --> G10622[c] + G10596[c]	(pvm:113802178)	pvm:113802178	rn00510	0	1000	0		2.4.1.259	Glycan biosynthesis and metabolism	N
R06260		G10617[c] + G10596[c] --> G10622[c] + G10597[c]	(pvm:113802188) or (pvm:113802188)	pvm:113802188;pvm:113802188	rn00510	0	1000	0		2.4.1.260	Glycan biosynthesis and metabolism	N
R06261		G10617[c] + G10597[c] --> G10622[c] + G00007[c]	(pvm:113803224)	pvm:113803224	rn00510	0	1000	0		2.4.1.261	Glycan biosynthesis and metabolism	N
R06262	dolichyl beta-D-glucosyl phosphate:D-Man-alpha-(1->2)-D-Man-alpha-(1->2)-D-Man-alpha-(1->3)-[D-Man-alpha-(1->2)-D-Man-alpha-(1->3)-[D-Man-alpha-(1->2)-D-Man-alpha-(1->6)]-D-Man-alpha-(1->6)]-D-Man-beta-(1->4)-D-GlcNAc-beta-(1->4)-D-GlcNAc-diphosphodolichol alpha-1,3-glucosyltransferase	G10618[c] + G00007[c] --> G10622[c] + G10598[c]	(pvm:113803235)	pvm:113803235	rn00510	0	1000	0		2.4.1.267	Glycan biosynthesis and metabolism	N
R06263	dolichyl beta-D-glucosyl phosphate:D-Glc-alpha-(1->3)-D-Man-alpha-(1->2)-D-Man-alpha-(1->2)-D-Man-alpha-(1->3)-[D-Man-alpha-(1->2)-D-Man-alpha-(1->3)-[D-Man-alpha-(1->2)-D-Man-alpha-(1->6)]-D-Man-alpha-(1->6)]-D-Man-beta-(1->4)-D-GlcNAc-beta-(1->4)-D-GlcNAc-diphosphodolichol alpha-1,3-glucosyltransferase	G10618[c] + G10598[c] --> G10622[c] + G10599[c]	(pvm:113803235)	pvm:113803235	rn00510	0	1000	0		2.4.1.265	Glycan biosynthesis and metabolism	N
R06277		G10609[c] + C00195[c] --> G10619[c] + G11121[c]	(pvm:113828240)	pvm:113828240	rn00600	0	1000	0		2.4.1.47	Lipid metabolism	N
R06364	CDPethanolamine:1-alkyl-2-acylglycerol ethanolaminephosphotransferase	C00570[c] + C03201[c] --> C00055[c] + C04475[c]	(pvm:113824240) or (pvm:113824240) or (pvm:113824281)	pvm:113824240;pvm:113824240;pvm:113824281	rn00565	0	1000	0		2.7.8.1	Lipid metabolism	N
R06366	Aldehyde:NAD+ oxidoreductase	C02576[c] + C00001[c] + C00003[c] --> C11924[c] + C00004[c] + C00080[c]	(pvm:113825010) or (pvm:113825013) or (pvm:113826103) or (pvm:113826145) or (pvm:113826151) or (pvm:113826159) or (pvm:113826162) or (pvm:113816548)	pvm:113825010;pvm:113825013;pvm:113826103;pvm:113826145;pvm:113826151;pvm:113826159;pvm:113826162;pvm:113816548	rn00903	0	1000	0		1.2.1.3	Metabolism of terpenoids and polyketides	N
R06411	3-hydroxy-2,6-dimethyl-5-methylene-heptanoyl-CoA hydro-lyase	C11946[c] + C00001[c] --> C11947[c]	(pvm:113813772) or (pvm:113813772)	pvm:113813772;pvm:113813772	rn00903	0	1000	0		4.2.1.17	Metabolism of terpenoids and polyketides	N
R06412	trans-2-Methyl-5-isopropylhexa-2,5-dienoyl-CoA hydro-lyase	C11945[c] + C00001[c] --> C11947[c]	(pvm:113813772) or (pvm:113813772)	pvm:113813772;pvm:113813772	rn00903	0	1000	0		4.2.1.17	Metabolism of terpenoids and polyketides	N
R06518	N-acylsphingosine amidohydrolase	C12126[c] + C00001[c] --> C00162[c] + C00836[c]	(pvm:113822940) or (pvm:113822940) or (pvm:113824066) or (pvm:113825207)	pvm:113822940;pvm:113822940;pvm:113824066;pvm:113825207	rn00600	0	1000	0		3.5.1.23	Lipid metabolism	N
R06519	dihydroceramide,ferrocytochrome b5:oxygen oxidoreductase (4,5-dehydrogenating)	C12126[c] + 2 C00999[c] + C00007[c] + 2 C00080[c] --> C00195[c] + 2 C00996[c] + 2 C00001[c]	(pvm:113813195)	pvm:113813195	rn00600	0	1000	0		1.14.19.17	Lipid metabolism	N
R06525	sphinganine,ferrocytochrome b5:oxygen oxidoreductase (C4-hydroxylating)	C00836[c] + 2 C00999[c] + C00007[c] + 2 C00080[c] --> C12144[c] + 2 C00996[c] + C00001[c]	(pvm:113813170)	pvm:113813170	rn00600	0	1000	0		1.14.18.5	Lipid metabolism	N
R06526	dihydroceramide,ferrocytochrome b5:oxygen oxidoreductase (C4-hydroxylating)	C12126[c] + 2 C00999[c] + C00007[c] + 2 C00080[c] --> C12145[c] + 2 C00996[c] + C00001[c]	(pvm:113813170)	pvm:113813170	rn00600	0	1000	0		1.14.18.5	Lipid metabolism	N
R06528	Phytoceramide amidohydrolase	C12145[c] + C00001[c] --> C00162[c] + C12144[c]	(pvm:113822940) or (pvm:113822940) or (pvm:113824066) or (pvm:113825207)	pvm:113822940;pvm:113822940;pvm:113824066;pvm:113825207	rn00600	0	1000	0		3.5.1.23	Lipid metabolism	N
R06583	4-coumarate:CoA ligase (AMP-forming)	C05619[c] + C00010[c] + C00002[c] --> C12203[c] + C00020[c] + C00013[c]	(pvm:113816148) or (pvm:113823190) or (pvm:113824334) or (pvm:113830072) or (pvm:113830090) or (pvm:113803418) or (pvm:113804620) or (pvm:113804621) or (pvm:113808051) or (pvm:113808051) or (pvm:113814950)	pvm:113816148;pvm:113823190;pvm:113824334;pvm:113830072;pvm:113830090;pvm:113803418;pvm:113804620;pvm:113804621;pvm:113808051;pvm:113808051;pvm:113814950	rn00940	0	1000	0		6.2.1.12	Biosynthesis of other secondary metabolites	N
R06590	sedoheptulose-7-phosphate:D-glyceraldehyde-3-phosphate glycolaldehydetransferase;	C12214[c] + C00117[c] --> C12215[c] + C05382[c]	(pvm:113822883)	pvm:113822883	rn01051	0	1000	0		2.2.1.1	Metabolism of terpenoids and polyketides	N
R06601	5-hydroxyisourate amidohydrolase	C11821[c] + C00001[c] --> C12248[c]	(pvm:113807691)	pvm:113807691	rn00230	0	1000	0		3.5.2.17	Nucleotide metabolism	N
R06604	5-hydroxy-2-oxo-4-ureido-2,5-dihydro-1H-imidazole-5-carboxylate carboxy-lyase [(S)-allantoin-forming]	C12248[c] --> C02350[c] + C00011[c]	(pvm:113820160)	pvm:113820160	rn00230	0	1000	0		4.1.1.97	Nucleotide metabolism	N
R06722	alpha 1,2-mannosyloligosaccharide alpha-D-mannohydrolase	C00001[c] + G00011[c] --> C00159[c] + G10694[c]	(pvm:113823159)	pvm:113823159	rn00510	0	1000	0		3.2.1.209	Glycan biosynthesis and metabolism	N
R06863	D-sedoheptulose-7-phosphate:thiamin diphosphate glycolaldehydetransferase	C05382[c] + C00068[c] --> C13378[c] + C00117[c]	(pvm:113822883)	pvm:113822883	rn00010	0	1000	0		2.2.1.1	Carbohydrate metabolism	N
R06868	S-Adenosyl-L-methionine:methylethanolamine phosphate N-methyltransferase	C00019[c] + C01210[c] --> C00021[c] + C13482[c]	(pvm:113803116) or (pvm:113803123) or (pvm:113803123) or (pvm:113803137) or (pvm:113804220) or (pvm:113804228)	pvm:113803116;pvm:113803123;pvm:113803123;pvm:113803137;pvm:113804220;pvm:113804228	rn00564	0	1000	0		2.1.1.103	Lipid metabolism	N
R06869	S-Adenosyl-L-methionine:phosphodimethylethanolamine N-methyltransferase	C00019[c] + C13482[c] + C00080[c] --> C00021[c] + C00588[c]	(pvm:113803116) or (pvm:113803123) or (pvm:113803123) or (pvm:113803137) or (pvm:113804220) or (pvm:113804228)	pvm:113803116;pvm:113803123;pvm:113803123;pvm:113803137;pvm:113804220;pvm:113804228	rn00564	0	1000	0		2.1.1.103	Lipid metabolism	N
R06875	1-Phosphatidyl-1D-myo-inositol 3,4-bisphosphate 3-phosphohydrolase	C11554[c] + C00001[c] --> C01277[c] + C00009[c]	(pvm:113815009) or (pvm:113815008) or (pvm:113816260) or (pvm:113816277)	pvm:113815009;pvm:113815008;pvm:113816260;pvm:113816277	rn04070	0	1000	0		3.1.3.64		N
R06917	1-hydroxymethylnaphthalene:NAD+ oxidoreductase	C14089[c] + C00003[c] --> C14090[c] + C00004[c] + C00080[c]	(pvm:113824313) or (pvm:113806470)	pvm:113824313;pvm:113806470	rn00626	0	1000	0		1.1.1.1	Xenobiotics biodegradation and metabolism	N
R06927	(2-naphthyl)methanol:NAD+ oxidoreductase	C02909[c] + C00003[c] --> C14099[c] + C00004[c] + C00080[c]	(pvm:113824313) or (pvm:113806470)	pvm:113824313;pvm:113806470	rn00626	0	1000	0		1.1.1.1	Xenobiotics biodegradation and metabolism	N
R06942	(3S)-3-hydroxyacyl-CoA hydro-lyase	C14144[c] + C00001[c] --> C14145[c]	(pvm:113813772) or (pvm:113813772)	pvm:113813772;pvm:113813772	rn00360	0	1000	0		4.2.1.17	Amino acid metabolism	N
R06983	S-(hydroxymethyl)glutathione dehydrogenase	C14180[c] + C00003[c] --> C01031[c] + C00004[c] + C00080[c]	(pvm:113805306) or (pvm:113806381)	pvm:113805306;pvm:113806381	rn00680	0	1000	0		1.1.1.284	Energy metabolism	N
R07002	(1R)-hydroxy-(2R)-glutathionyl-1,2-dihydronaphthalene glutathione-lyase (epoxide-forming)	C14786[c] + C00051[c] --> C14791[c]	(pvm:113825341) or (pvm:113825373) or (pvm:113825371) or (pvm:113826467) or (pvm:113826491) or (pvm:113826502) or (pvm:113827639) or (pvm:113827639) or (pvm:113827638) or (pvm:113827647) or (pvm:113827664) or (pvm:113827708) or (pvm:113827712) or (pvm:113827714) or (pvm:113828804) or (pvm:113828804) or (pvm:113828822) or (pvm:113829890) or (pvm:113829896) or (pvm:113829903) or (pvm:113829904) or …	pvm:113825341;pvm:113825373;pvm:113825371;pvm:113826467;pvm:113826491;pvm:113826502;pvm:113827639;pvm:113827639;pvm:113827638;pvm:113827647;pvm:113827664;pvm:113827708;pvm:113827712;pvm:113827714;pvm:113828804;pvm:113828804;pvm:113828822;pvm:113829890;pvm:113829896;pvm:113829903;pvm:113829904;pvm:113829943;pvm:113829946	rn00980	0	1000	0		2.5.1.18	Xenobiotics biodegradation and metabolism	N
R07003	(1R)-glutathionyl-(2R)-hydroxy-1,2-dihydronaphthalene glutathione-lyase (epoxide-forming)	C14787[c] + C00051[c] --> C14793[c]	(pvm:113825341) or (pvm:113825373) or (pvm:113825371) or (pvm:113826467) or (pvm:113826491) or (pvm:113826502) or (pvm:113827639) or (pvm:113827639) or (pvm:113827638) or (pvm:113827647) or (pvm:113827664) or (pvm:113827708) or (pvm:113827712) or (pvm:113827714) or (pvm:113828804) or (pvm:113828804) or (pvm:113828822) or (pvm:113829890) or (pvm:113829896) or (pvm:113829903) or (pvm:113829904) or …	pvm:113825341;pvm:113825373;pvm:113825371;pvm:113826467;pvm:113826491;pvm:113826502;pvm:113827639;pvm:113827639;pvm:113827638;pvm:113827647;pvm:113827664;pvm:113827708;pvm:113827712;pvm:113827714;pvm:113828804;pvm:113828804;pvm:113828822;pvm:113829890;pvm:113829896;pvm:113829903;pvm:113829904;pvm:113829943;pvm:113829946	rn00980	0	1000	0		2.5.1.18	Xenobiotics biodegradation and metabolism	N
R07004	(1S)-hydroxy-(2S)-glutathionyl-1,2-dihydronaphthalene glutathione-lyase (epoxide-forming)	C14787[c] + C00051[c] --> C14792[c]	(pvm:113825341) or (pvm:113825373) or (pvm:113825371) or (pvm:113826467) or (pvm:113826491) or (pvm:113826502) or (pvm:113827639) or (pvm:113827639) or (pvm:113827638) or (pvm:113827647) or (pvm:113827664) or (pvm:113827708) or (pvm:113827712) or (pvm:113827714) or (pvm:113828804) or (pvm:113828804) or (pvm:113828822) or (pvm:113829890) or (pvm:113829896) or (pvm:113829903) or (pvm:113829904) or …	pvm:113825341;pvm:113825373;pvm:113825371;pvm:113826467;pvm:113826491;pvm:113826502;pvm:113827639;pvm:113827639;pvm:113827638;pvm:113827647;pvm:113827664;pvm:113827708;pvm:113827712;pvm:113827714;pvm:113828804;pvm:113828804;pvm:113828822;pvm:113829890;pvm:113829896;pvm:113829903;pvm:113829904;pvm:113829943;pvm:113829946	rn00980	0	1000	0		2.5.1.18	Xenobiotics biodegradation and metabolism	N
R07013	(1R,2S)-naphthalene 1,2-oxide hydrolase	C14786[c] + C00001[c] --> C06205[c]	(pvm:113829078)	pvm:113829078	rn00980	0	1000	0		3.3.2.9	Xenobiotics biodegradation and metabolism	N
R07014	(1S,2R)-naphthalene 1,2-oxide hydrolase	C14787[c] + C00001[c] --> C06205[c]	(pvm:113829078)	pvm:113829078	rn00980	0	1000	0		3.3.2.9	Xenobiotics biodegradation and metabolism	N
R07015	1,2-Dihydronaphthalene-1,2-diol dehydrogenase	C06205[c] + C00006[c] --> C03012[c] + C00005[c] + C00080[c]	(pvm:113817902) or (pvm:113817903)	pvm:113817902;pvm:113817903	rn00980	0	1000	0		1.3.1.20	Xenobiotics biodegradation and metabolism	N
R07023	1-nitro-7-hydroxy-8-glutathionyl-7,8-dihydronaphthalene glutathione-lyase (epoxide-forming)	C14802[c] + C00051[c] --> C14803[c]	(pvm:113825341) or (pvm:113825373) or (pvm:113825371) or (pvm:113826467) or (pvm:113826491) or (pvm:113826502) or (pvm:113827639) or (pvm:113827639) or (pvm:113827638) or (pvm:113827647) or (pvm:113827664) or (pvm:113827708) or (pvm:113827712) or (pvm:113827714) or (pvm:113828804) or (pvm:113828804) or (pvm:113828822) or (pvm:113829890) or (pvm:113829896) or (pvm:113829903) or (pvm:113829904) or …	pvm:113825341;pvm:113825373;pvm:113825371;pvm:113826467;pvm:113826491;pvm:113826502;pvm:113827639;pvm:113827639;pvm:113827638;pvm:113827647;pvm:113827664;pvm:113827708;pvm:113827712;pvm:113827714;pvm:113828804;pvm:113828804;pvm:113828822;pvm:113829890;pvm:113829896;pvm:113829903;pvm:113829904;pvm:113829943;pvm:113829946	rn00980	0	1000	0		2.5.1.18	Xenobiotics biodegradation and metabolism	N
R07024	1-nitro-7-glutathionyl-8-hydroxy-7,8-dihydronaphthalene glutathione-lyase (epoxide-forming)	C14802[c] + C00051[c] --> C14804[c]	(pvm:113825341) or (pvm:113825373) or (pvm:113825371) or (pvm:113826467) or (pvm:113826491) or (pvm:113826502) or (pvm:113827639) or (pvm:113827639) or (pvm:113827638) or (pvm:113827647) or (pvm:113827664) or (pvm:113827708) or (pvm:113827712) or (pvm:113827714) or (pvm:113828804) or (pvm:113828804) or (pvm:113828822) or (pvm:113829890) or (pvm:113829896) or (pvm:113829903) or (pvm:113829904) or …	pvm:113825341;pvm:113825373;pvm:113825371;pvm:113826467;pvm:113826491;pvm:113826502;pvm:113827639;pvm:113827639;pvm:113827638;pvm:113827647;pvm:113827664;pvm:113827708;pvm:113827712;pvm:113827714;pvm:113828804;pvm:113828804;pvm:113828822;pvm:113829890;pvm:113829896;pvm:113829903;pvm:113829904;pvm:113829943;pvm:113829946	rn00980	0	1000	0		2.5.1.18	Xenobiotics biodegradation and metabolism	N
R07025	1-nitro-5-hydroxy-6-glutathionyl-5,6-dihydronaphthalene glutathione-lyase (epoxide-forming)	C14800[c] + C00051[c] --> C14805[c]	(pvm:113825341) or (pvm:113825373) or (pvm:113825371) or (pvm:113826467) or (pvm:113826491) or (pvm:113826502) or (pvm:113827639) or (pvm:113827639) or (pvm:113827638) or (pvm:113827647) or (pvm:113827664) or (pvm:113827708) or (pvm:113827712) or (pvm:113827714) or (pvm:113828804) or (pvm:113828804) or (pvm:113828822) or (pvm:113829890) or (pvm:113829896) or (pvm:113829903) or (pvm:113829904) or …	pvm:113825341;pvm:113825373;pvm:113825371;pvm:113826467;pvm:113826491;pvm:113826502;pvm:113827639;pvm:113827639;pvm:113827638;pvm:113827647;pvm:113827664;pvm:113827708;pvm:113827712;pvm:113827714;pvm:113828804;pvm:113828804;pvm:113828822;pvm:113829890;pvm:113829896;pvm:113829903;pvm:113829904;pvm:113829943;pvm:113829946	rn00980	0	1000	0		2.5.1.18	Xenobiotics biodegradation and metabolism	N
R07026	1-nitro-5-glutathionyl-6-hydroxy-5,6-dihydronaphthalene glutathione-lyase (epoxide-forming)	C14800[c] + C00051[c] --> C14806[c]	(pvm:113825341) or (pvm:113825373) or (pvm:113825371) or (pvm:113826467) or (pvm:113826491) or (pvm:113826502) or (pvm:113827639) or (pvm:113827639) or (pvm:113827638) or (pvm:113827647) or (pvm:113827664) or (pvm:113827708) or (pvm:113827712) or (pvm:113827714) or (pvm:113828804) or (pvm:113828804) or (pvm:113828822) or (pvm:113829890) or (pvm:113829896) or (pvm:113829903) or (pvm:113829904) or …	pvm:113825341;pvm:113825373;pvm:113825371;pvm:113826467;pvm:113826491;pvm:113826502;pvm:113827639;pvm:113827639;pvm:113827638;pvm:113827647;pvm:113827664;pvm:113827708;pvm:113827712;pvm:113827714;pvm:113828804;pvm:113828804;pvm:113828822;pvm:113829890;pvm:113829896;pvm:113829903;pvm:113829904;pvm:113829943;pvm:113829946	rn00980	0	1000	0		2.5.1.18	Xenobiotics biodegradation and metabolism	N
R07027	1-nitronaphthalene-5,6-oxide hydrolase	C14800[c] + C00001[c] --> C14801[c]	(pvm:113829078)	pvm:113829078	rn00980	0	1000	0		3.3.2.9	Xenobiotics biodegradation and metabolism	N
R07034	Glutathione: 5-HPETE oxidoreductase	2 C00051[c] + C05356[c] --> C00127[c] + C04805[c] + C00001[c]	(pvm:113806294) or (pvm:113806295) or (pvm:113806297) or (pvm:113807425) or (pvm:113807430)	pvm:113806294;pvm:113806295;pvm:113806297;pvm:113807425;pvm:113807430	rn00590	0	1000	0		1.11.1.9	Lipid metabolism	N
R07035	Glutathione: 15-HPETE oxidoreductase	2 C00051[c] + C05966[c] --> C00127[c] + C04742[c] + C00001[c]	(pvm:113806294) or (pvm:113806295) or (pvm:113806297) or (pvm:113807425) or (pvm:113807430)	pvm:113806294;pvm:113806295;pvm:113806297;pvm:113807425;pvm:113807430	rn00590	0	1000	0		1.11.1.9	Lipid metabolism	N
R07042		C05966[c] --> C14781[c]	(pvm:113829697) or (pvm:113801218) or (pvm:113802729) or (pvm:113802766) or (pvm:113803893) or (pvm:113803906) or (pvm:113803903) or (pvm:113803928) or (pvm:113805029) or (pvm:113805029) or (pvm:113805053)	pvm:113829697;pvm:113801218;pvm:113802729;pvm:113802766;pvm:113803893;pvm:113803906;pvm:113803903;pvm:113803928;pvm:113805029;pvm:113805029;pvm:113805053	rn00590	0	1000	0		1.14.14.1	Lipid metabolism	N
R07043		C05966[c] --> C14813[c]	(pvm:113829697) or (pvm:113801218) or (pvm:113802729) or (pvm:113802766) or (pvm:113803893) or (pvm:113803906) or (pvm:113803903) or (pvm:113803928) or (pvm:113805029) or (pvm:113805029) or (pvm:113805053)	pvm:113829697;pvm:113801218;pvm:113802729;pvm:113802766;pvm:113803893;pvm:113803906;pvm:113803903;pvm:113803928;pvm:113805029;pvm:113805029;pvm:113805053	rn00590	0	1000	0		1.14.14.1	Lipid metabolism	N
R07044		C14781[c] + C00001[c] --> C14782[c]	(pvm:113829697) or (pvm:113801218) or (pvm:113802729) or (pvm:113802766) or (pvm:113803893) or (pvm:113803906) or (pvm:113803903) or (pvm:113803928) or (pvm:113805029) or (pvm:113805029) or (pvm:113805053)	pvm:113829697;pvm:113801218;pvm:113802729;pvm:113802766;pvm:113803893;pvm:113803906;pvm:113803903;pvm:113803928;pvm:113805029;pvm:113805029;pvm:113805053	rn00590	0	1000	0		1.14.14.1	Lipid metabolism	N
R07045		C14813[c] + C00001[c] --> C14814[c]	(pvm:113829697) or (pvm:113801218) or (pvm:113802729) or (pvm:113802766) or (pvm:113803893) or (pvm:113803906) or (pvm:113803903) or (pvm:113803928) or (pvm:113805029) or (pvm:113805029) or (pvm:113805053)	pvm:113829697;pvm:113801218;pvm:113802729;pvm:113802766;pvm:113803893;pvm:113803906;pvm:113803903;pvm:113803928;pvm:113805029;pvm:113805029;pvm:113805053	rn00590	0	1000	0		1.14.14.1	Lipid metabolism	N
R07054		C00219[c] + C00007[c] + C00005[c] + C00080[c] --> C14778[c] + C00006[c] + C00001[c]	(pvm:113829697) or (pvm:113801218) or (pvm:113802729) or (pvm:113802766) or (pvm:113803893) or (pvm:113803906) or (pvm:113803903) or (pvm:113803928) or (pvm:113805029) or (pvm:113805029) or (pvm:113805053)	pvm:113829697;pvm:113801218;pvm:113802729;pvm:113802766;pvm:113803893;pvm:113803906;pvm:113803903;pvm:113803928;pvm:113805029;pvm:113805029;pvm:113805053	rn00590	0	1000	0		1.14.14.1	Lipid metabolism	N
R07059		C01222[c] <=> C14830[c]	(pvm:113805306)	pvm:113805306	rn00051	-1000	1000	0		1.1.1.271	Carbohydrate metabolism	Y
R07060		C14830[c] + C00005[c] + C00080[c] --> C00325[c] + C00006[c]	(pvm:113805306)	pvm:113805306	rn00480	0	1000	0		1.1.1.271	Metabolism of other amino acids	N
R07069	3,4-dihydro-3-hydroxy-4-S-glutathionyl bromobenzene glutathione-lyase (epoxide-forming)	C14839[c] + C00051[c] --> C14847[c]	(pvm:113825341) or (pvm:113825373) or (pvm:113825371) or (pvm:113826467) or (pvm:113826491) or (pvm:113826502) or (pvm:113827639) or (pvm:113827639) or (pvm:113827638) or (pvm:113827647) or (pvm:113827664) or (pvm:113827708) or (pvm:113827712) or (pvm:113827714) or (pvm:113828804) or (pvm:113828804) or (pvm:113828822) or (pvm:113829890) or (pvm:113829896) or (pvm:113829903) or (pvm:113829904) or …	pvm:113825341;pvm:113825373;pvm:113825371;pvm:113826467;pvm:113826491;pvm:113826502;pvm:113827639;pvm:113827639;pvm:113827638;pvm:113827647;pvm:113827664;pvm:113827708;pvm:113827712;pvm:113827714;pvm:113828804;pvm:113828804;pvm:113828822;pvm:113829890;pvm:113829896;pvm:113829903;pvm:113829904;pvm:113829943;pvm:113829946	rn00980	0	1000	0		2.5.1.18	Xenobiotics biodegradation and metabolism	N
R07070	2,3-dihydro-2-S-glutathionyl-3-hydroxy bromobenzene glutathione-lyase (epoxide-forming)	C14840[c] + C00051[c] --> C14848[c]	(pvm:113825341) or (pvm:113825373) or (pvm:113825371) or (pvm:113826467) or (pvm:113826491) or (pvm:113826502) or (pvm:113827639) or (pvm:113827639) or (pvm:113827638) or (pvm:113827647) or (pvm:113827664) or (pvm:113827708) or (pvm:113827712) or (pvm:113827714) or (pvm:113828804) or (pvm:113828804) or (pvm:113828822) or (pvm:113829890) or (pvm:113829896) or (pvm:113829903) or (pvm:113829904) or …	pvm:113825341;pvm:113825373;pvm:113825371;pvm:113826467;pvm:113826491;pvm:113826502;pvm:113827639;pvm:113827639;pvm:113827638;pvm:113827647;pvm:113827664;pvm:113827708;pvm:113827712;pvm:113827714;pvm:113828804;pvm:113828804;pvm:113828822;pvm:113829890;pvm:113829896;pvm:113829903;pvm:113829904;pvm:113829943;pvm:113829946	rn00980	0	1000	0		2.5.1.18	Xenobiotics biodegradation and metabolism	N
R07071	bromobenzene-3,4-oxide hydrolase	C14839[c] + C00001[c] --> C14844[c]	(pvm:113829078)	pvm:113829078	rn00980	0	1000	0		3.3.2.9	Xenobiotics biodegradation and metabolism	N
R07072	bromobenzene-2,3-oxide hydrolase	C14840[c] + C00001[c] --> C14842[c]	(pvm:113829078)	pvm:113829078	rn00980	0	1000	0		3.3.2.9	Xenobiotics biodegradation and metabolism	N
R07082	benzo[a]pyrene-7,8-oxide hydrolase	C14850[c] + C00001[c] --> C14852[c]	(pvm:113829078)	pvm:113829078	rn00980	0	1000	0		3.3.2.9	Xenobiotics biodegradation and metabolism	N
R07083	4,5-dihydro-4-hydroxy-5-S-glutathionyl-benzo[a]pyrene glutathione-lyase (epoxide-forming)	C14851[c] + C00051[c] --> C14855[c]	(pvm:113825341) or (pvm:113825373) or (pvm:113825371) or (pvm:113826467) or (pvm:113826491) or (pvm:113826502) or (pvm:113827639) or (pvm:113827639) or (pvm:113827638) or (pvm:113827647) or (pvm:113827664) or (pvm:113827708) or (pvm:113827712) or (pvm:113827714) or (pvm:113828804) or (pvm:113828804) or (pvm:113828822) or (pvm:113829890) or (pvm:113829896) or (pvm:113829903) or (pvm:113829904) or …	pvm:113825341;pvm:113825373;pvm:113825371;pvm:113826467;pvm:113826491;pvm:113826502;pvm:113827639;pvm:113827639;pvm:113827638;pvm:113827647;pvm:113827664;pvm:113827708;pvm:113827712;pvm:113827714;pvm:113828804;pvm:113828804;pvm:113828822;pvm:113829890;pvm:113829896;pvm:113829903;pvm:113829904;pvm:113829943;pvm:113829946	rn00980	0	1000	0		2.5.1.18	Xenobiotics biodegradation and metabolism	N
R07084	7,8-dihydro-7-hydroxy-8-S-glutathionyl-benzo[a]pyrene hydrolase	C14852[c] + C00051[c] --> C14856[c] + C00001[c]	(pvm:113825341) or (pvm:113825373) or (pvm:113825371) or (pvm:113826467) or (pvm:113826491) or (pvm:113826502) or (pvm:113827639) or (pvm:113827639) or (pvm:113827638) or (pvm:113827647) or (pvm:113827664) or (pvm:113827708) or (pvm:113827712) or (pvm:113827714) or (pvm:113828804) or (pvm:113828804) or (pvm:113828822) or (pvm:113829890) or (pvm:113829896) or (pvm:113829903) or (pvm:113829904) or …	pvm:113825341;pvm:113825373;pvm:113825371;pvm:113826467;pvm:113826491;pvm:113826502;pvm:113827639;pvm:113827639;pvm:113827638;pvm:113827647;pvm:113827664;pvm:113827708;pvm:113827712;pvm:113827714;pvm:113828804;pvm:113828804;pvm:113828822;pvm:113829890;pvm:113829896;pvm:113829903;pvm:113829904;pvm:113829943;pvm:113829946	rn00980	0	1000	0		2.5.1.18	Xenobiotics biodegradation and metabolism	N
R07091	S-(2,2-dichloro-1-hydroxy)ethyl-glutathione 2,2-dichloroacetaldehyde-lyase (glutathione-forming)	C14858[c] + C00051[c] --> C14861[c]	(pvm:113825341) or (pvm:113825373) or (pvm:113825371) or (pvm:113826467) or (pvm:113826491) or (pvm:113826502) or (pvm:113827639) or (pvm:113827639) or (pvm:113827638) or (pvm:113827647) or (pvm:113827664) or (pvm:113827708) or (pvm:113827712) or (pvm:113827714) or (pvm:113828804) or (pvm:113828804) or (pvm:113828822) or (pvm:113829890) or (pvm:113829896) or (pvm:113829903) or (pvm:113829904) or …	pvm:113825341;pvm:113825373;pvm:113825371;pvm:113826467;pvm:113826491;pvm:113826502;pvm:113827639;pvm:113827639;pvm:113827638;pvm:113827647;pvm:113827664;pvm:113827708;pvm:113827712;pvm:113827714;pvm:113828804;pvm:113828804;pvm:113828822;pvm:113829890;pvm:113829896;pvm:113829903;pvm:113829904;pvm:113829943;pvm:113829946	rn00980	0	1000	0		2.5.1.18	Xenobiotics biodegradation and metabolism	N
R07092	1,1-dichloroethylene-epoxide:glutathione S-(chloroepoxyethyl)transferase [2-(S-glutathionyl)acetyl-chloride-forming]	C14857[c] + C00051[c] --> C14865[c] + C01327[c]	(pvm:113825341) or (pvm:113825373) or (pvm:113825371) or (pvm:113826467) or (pvm:113826491) or (pvm:113826502) or (pvm:113827639) or (pvm:113827639) or (pvm:113827638) or (pvm:113827647) or (pvm:113827664) or (pvm:113827708) or (pvm:113827712) or (pvm:113827714) or (pvm:113828804) or (pvm:113828804) or (pvm:113828822) or (pvm:113829890) or (pvm:113829896) or (pvm:113829903) or (pvm:113829904) or …	pvm:113825341;pvm:113825373;pvm:113825371;pvm:113826467;pvm:113826491;pvm:113826502;pvm:113827639;pvm:113827639;pvm:113827638;pvm:113827647;pvm:113827664;pvm:113827708;pvm:113827712;pvm:113827714;pvm:113828804;pvm:113828804;pvm:113828822;pvm:113829890;pvm:113829896;pvm:113829903;pvm:113829904;pvm:113829943;pvm:113829946	rn00980	0	1000	0		2.5.1.18	Xenobiotics biodegradation and metabolism	N
R07093	chloroacetyl-chloride:glutathione S-chloroacetyltransferase	C14859[c] + C00051[c] --> C14864[c] + C01327[c]	(pvm:113825341) or (pvm:113825373) or (pvm:113825371) or (pvm:113826467) or (pvm:113826491) or (pvm:113826502) or (pvm:113827639) or (pvm:113827639) or (pvm:113827638) or (pvm:113827647) or (pvm:113827664) or (pvm:113827708) or (pvm:113827712) or (pvm:113827714) or (pvm:113828804) or (pvm:113828804) or (pvm:113828822) or (pvm:113829890) or (pvm:113829896) or (pvm:113829903) or (pvm:113829904) or …	pvm:113825341;pvm:113825373;pvm:113825371;pvm:113826467;pvm:113826491;pvm:113826502;pvm:113827639;pvm:113827639;pvm:113827638;pvm:113827647;pvm:113827664;pvm:113827708;pvm:113827712;pvm:113827714;pvm:113828804;pvm:113828804;pvm:113828822;pvm:113829890;pvm:113829896;pvm:113829903;pvm:113829904;pvm:113829943;pvm:113829946	rn00980	0	1000	0		2.5.1.18	Xenobiotics biodegradation and metabolism	N
R07094	2-(S-glutathionyl)acetyl-chloride:glutathione 2-(S-glutathionyl)acetyltransferase	C14865[c] + C00051[c] --> C14863[c] + C01327[c]	(pvm:113825341) or (pvm:113825373) or (pvm:113825371) or (pvm:113826467) or (pvm:113826491) or (pvm:113826502) or (pvm:113827639) or (pvm:113827639) or (pvm:113827638) or (pvm:113827647) or (pvm:113827664) or (pvm:113827708) or (pvm:113827712) or (pvm:113827714) or (pvm:113828804) or (pvm:113828804) or (pvm:113828822) or (pvm:113829890) or (pvm:113829896) or (pvm:113829903) or (pvm:113829904) or …	pvm:113825341;pvm:113825373;pvm:113825371;pvm:113826467;pvm:113826491;pvm:113826502;pvm:113827639;pvm:113827639;pvm:113827638;pvm:113827647;pvm:113827664;pvm:113827708;pvm:113827712;pvm:113827714;pvm:113828804;pvm:113828804;pvm:113828822;pvm:113829890;pvm:113829896;pvm:113829903;pvm:113829904;pvm:113829943;pvm:113829946	rn00980	0	1000	0		2.5.1.18	Xenobiotics biodegradation and metabolism	N
R07100	trichloroethene:glutathione S-(1,2-dichlorovinyl)transferase	C06790[c] + C00051[c] --> C14868[c] + C01327[c]	(pvm:113825341) or (pvm:113825373) or (pvm:113825371) or (pvm:113826467) or (pvm:113826491) or (pvm:113826502) or (pvm:113827639) or (pvm:113827639) or (pvm:113827638) or (pvm:113827647) or (pvm:113827664) or (pvm:113827708) or (pvm:113827712) or (pvm:113827714) or (pvm:113828804) or (pvm:113828804) or (pvm:113828822) or (pvm:113829890) or (pvm:113829896) or (pvm:113829903) or (pvm:113829904) or …	pvm:113825341;pvm:113825373;pvm:113825371;pvm:113826467;pvm:113826491;pvm:113826502;pvm:113827639;pvm:113827639;pvm:113827638;pvm:113827647;pvm:113827664;pvm:113827708;pvm:113827712;pvm:113827714;pvm:113828804;pvm:113828804;pvm:113828822;pvm:113829890;pvm:113829896;pvm:113829903;pvm:113829904;pvm:113829943;pvm:113829946	rn00980	0	1000	0		2.5.1.18	Xenobiotics biodegradation and metabolism	N
R07105	trichloroethanol:NAD+ oxidoreductase	C06899[c] + C00004[c] + C00080[c] --> C07490[c] + C00003[c] + C00001[c]	(pvm:113824313) or (pvm:113806470)	pvm:113824313;pvm:113806470	rn00980	0	1000	0		1.1.1.1	Xenobiotics biodegradation and metabolism	N
R07106	UDP-glucuronate beta-D-glucuronosyltransferase	C07490[c] + C00167[c] <=> C14869[c] + C00015[c]	(pvm:113823738) or (pvm:113823745) or (pvm:113823747) or (pvm:113823748) or (pvm:113823750) or (pvm:113823750) or (pvm:113823785) or (pvm:113823789) or (pvm:113823789) or (pvm:113823792) or (pvm:113823795)	pvm:113823738;pvm:113823745;pvm:113823747;pvm:113823748;pvm:113823750;pvm:113823750;pvm:113823785;pvm:113823789;pvm:113823789;pvm:113823792;pvm:113823795	rn00980	-1000	1000	0		2.4.1.17	Xenobiotics biodegradation and metabolism	Y
R07113	1,2-dibromoethane:glutathione ethylenetransferase (episulfonium-forming)	C11088[c] + C00051[c] + C00080[c] --> C14874[c] + 2 C13645[c]	(pvm:113825341) or (pvm:113825373) or (pvm:113825371) or (pvm:113826467) or (pvm:113826491) or (pvm:113826502) or (pvm:113827639) or (pvm:113827639) or (pvm:113827638) or (pvm:113827647) or (pvm:113827664) or (pvm:113827708) or (pvm:113827712) or (pvm:113827714) or (pvm:113828804) or (pvm:113828804) or (pvm:113828822) or (pvm:113829890) or (pvm:113829896) or (pvm:113829903) or (pvm:113829904) or …	pvm:113825341;pvm:113825373;pvm:113825371;pvm:113826467;pvm:113826491;pvm:113826502;pvm:113827639;pvm:113827639;pvm:113827638;pvm:113827647;pvm:113827664;pvm:113827708;pvm:113827712;pvm:113827714;pvm:113828804;pvm:113828804;pvm:113828822;pvm:113829890;pvm:113829896;pvm:113829903;pvm:113829904;pvm:113829943;pvm:113829946	rn00980	0	1000	0		2.5.1.18	Xenobiotics biodegradation and metabolism	N
R07116	2-bromoacetaldehyde:glutathione S-(formylmethyl)transferase	C14870[c] + C00051[c] --> C14871[c] + C13645[c]	(pvm:113825341) or (pvm:113825373) or (pvm:113825371) or (pvm:113826467) or (pvm:113826491) or (pvm:113826502) or (pvm:113827639) or (pvm:113827639) or (pvm:113827638) or (pvm:113827647) or (pvm:113827664) or (pvm:113827708) or (pvm:113827712) or (pvm:113827714) or (pvm:113828804) or (pvm:113828804) or (pvm:113828822) or (pvm:113829890) or (pvm:113829896) or (pvm:113829903) or (pvm:113829904) or …	pvm:113825341;pvm:113825373;pvm:113825371;pvm:113826467;pvm:113826491;pvm:113826502;pvm:113827639;pvm:113827639;pvm:113827638;pvm:113827647;pvm:113827664;pvm:113827708;pvm:113827712;pvm:113827714;pvm:113828804;pvm:113828804;pvm:113828822;pvm:113829890;pvm:113829896;pvm:113829903;pvm:113829904;pvm:113829943;pvm:113829946	rn00980	0	1000	0		2.5.1.18	Xenobiotics biodegradation and metabolism	N
R07140	S-(hydroxymethyl)glutathione:NADP+ oxidoreductase	C14180[c] + C00006[c] --> C01031[c] + C00005[c] + C00080[c]	(pvm:113805306) or (pvm:113806381)	pvm:113805306;pvm:113806381	rn00480	0	1000	0		1.1.1.284	Metabolism of other amino acids	N
R07145	L-iditol:NAD+ 2-oxidoreductase	C01507[c] + C00003[c] --> C00247[c] + C00004[c] + C00080[c]	(pvm:113811960) or (pvm:113823751) or (pvm:113800032) or (pvm:113821546)	pvm:113811960;pvm:113823751;pvm:113800032;pvm:113821546	rn00730	0	1000	0		1.1.1.14	Metabolism of cofactors and vitamins	N
R07163	all-trans-13,14-dihydroretinol:acceptor 13,14-oxidoreductas	C15492[c] + C00028[c] --> C00473[c] + C00030[c]	(pvm:113829568)	pvm:113829568	rn00830	0	1000	0		1.3.99.23	Metabolism of cofactors and vitamins	N
R07164	L-aspartate:NAD+ oxidoreductase (deaminating)	C00049[c] + C00001[c] + C00003[c] --> C00036[c] + C00014[c] + C00004[c] + C00080[c]	(pvm:113818864)	pvm:113818864	rn00730	0	1000	0		1.4.1.21	Metabolism of cofactors and vitamins	N
R07165	L-aspartate:NADP+ oxidoreductase (deaminating)	C00049[c] + C00001[c] + C00006[c] --> C00036[c] + C00014[c] + C00005[c] + C00080[c]	(pvm:113818864)	pvm:113818864	rn00480	0	1000	0		1.4.1.21	Metabolism of other amino acids	N
R07168	5-methyltetrahydrofolate:NAD+ oxidoreductase	C00440[c] + C00003[c] --> C00143[c] + C00004[c] + C00080[c]	(pvm:113820096)	pvm:113820096	rn00670	0	1000	0		1.5.1.20	Metabolism of cofactors and vitamins	N
R07172	NADPH:oxygen oxidoreductase	C00005[c] + C00080[c] + C00007[c] --> C00006[c] + C00027[c]	(pvm:113827175) or (pvm:113827175)	pvm:113827175;pvm:113827175	rn00480	0	1000	0		1.6.3.1	Metabolism of other amino acids	N
R07211	L-phenylalanine,tetrahydrobiopterin:oxygen oxidoreductase(4-hydroxylating)	C00079[c] + C00272[c] + C00007[c] --> C00082[c] + C15522[c]	(pvm:113813041)	pvm:113813041	rn00790	0	1000	0		1.14.16.1	Metabolism of cofactors and vitamins	N
R07212	L-tyrosine,tetrahydrobiopterin:oxygen oxidoreductase(3-hydroxylating)	C00082[c] + C00272[c] + C00007[c] --> C00355[c] + C15522[c]	(pvm:113813041)	pvm:113813041	rn00790	0	1000	0		1.14.16.2	Metabolism of cofactors and vitamins	N
R07213	L-tryptophan,tetrahydrobiopterin:oxygen oxidoreductase(5-hydroxylating)	C00078[c] + C00272[c] + C00007[c] --> C00643[c] + C15522[c]	(pvm:113813054)	pvm:113813054	rn00790	0	1000	0		1.14.16.4	Metabolism of cofactors and vitamins	N
R07215	lathosterol,ferrocytochrome b5:oxygen oxidoreductase 5,6-dehydrogenating	C01189[c] + 2 C00999[c] + C00007[c] + 2 C00080[c] --> C01164[c] + 2 C00996[c] + 2 C00001[c]	(pvm:113814287)	pvm:113814287	rn00100	0	1000	0		1.14.19.20	Lipid metabolism	N
R07258	UDP-N-acetyl-D-glucosamine:6-(alpha-D-mannosyl)-beta-D-mannosyl-glycoprotein 2-beta-N-acetyl-D-glucosaminyltransferase	C00043[c] + C15543[c] --> C00015[c] + C04944[c]	(pvm:113821444) or (pvm:113821452)	pvm:113821444;pvm:113821452	rn00240	0	1000	0		2.4.1.143	Nucleotide metabolism	N
R07259	UDP-N-acetyl-D-glucosamine:beta-D-mannosyl-glycoprotein 4-beta-N-acetyl-D-glucosaminyltransferase	C00043[c] + C04942[c] --> C00015[c] + C15544[c]	(pvm:113821467) or (pvm:113822604)	pvm:113821467;pvm:113822604	rn00240	0	1000	0		2.4.1.144	Nucleotide metabolism	N
R07268	ATP:cobinamide Cobeta-adenosyltransferase	C00002[c] + C05774[c] + C00080[c] --> C00536[c] + C06508[c]	(pvm:113825319)	pvm:113825319	rn00860	0	1000	0		2.5.1.17	Metabolism of cofactors and vitamins	N
R07273	solanesyl-diphosphate:4-hydroxybenzoate nonaprenyltransferase	C04145[c] + C00156[c] --> C00013[c] + C03885[c]	(pvm:5333210) or (pvm:113800453)	pvm:5333210;pvm:113800453	rn00130	0	1000	0		2.5.1.39	Metabolism of cofactors and vitamins	N
R07288	3'-phosphoadenylyl-sulfate:dermatan 6'-sulfotransferase	C00053[c] + C01490[c] --> C00054[c] + C15558[c]	(pvm:113825517) or (pvm:113825518) or (pvm:113825543) or (pvm:113825544) or (pvm:113825545)	pvm:113825517;pvm:113825518;pvm:113825543;pvm:113825544;pvm:113825545	rn00230	0	1000	0		2.8.2.17	Nucleotide metabolism	N
R07291	2-lysophosphatidylcholine acylhydrolase	C04230[c] + C00001[c] --> C00670[c] + C00060[c] + C00080[c]	(pvm:113802580) or (pvm:113803646) or (pvm:113803653) or (pvm:113803690)	pvm:113802580;pvm:113803646;pvm:113803653;pvm:113803690	rn01100	0	1000	0		3.1.1.5	Global and overview maps	N
R07293	monoacylglycerol acylhydrolase	C01885[c] + C00001[c] --> C00116[c] + C00060[c] + C00080[c]	(pvm:113804808) or (pvm:113805920)	pvm:113804808;pvm:113805920	rn00561	0	1000	0		3.1.1.79	Lipid metabolism	N
R07313	D-dopachrome carboxy-lyase	C15566[c] --> C05578[c] + C00011[c]	(pvm:113815297)	pvm:113815297	rn01100	0	1000	0		4.1.1.84	Global and overview maps	N
R07314	(3S)-3-hydroxyacyl-CoA hydro-lyase	C00640[c] + C01438[c] --> C05067[c] + C00001[c] + 2 C00080[c] + 2 C05359 [c]	(pvm:113813772) or (pvm:113813772)	pvm:113813772;pvm:113813772	rn00062	0	1000	0		4.2.1.17	Lipid metabolism	N
R07334	UDP-N-acetyl-D-glucosamine:beta-D-glucuronosyl-(1->4)-N-acetyl-alpha-D-glucosaminyl-proteoglycan 4-alpha-N-acetylglucosaminyltransferase	C15573[c] + C00043[c] --> C00015[c] + C15574[c]	(pvm:113829446) or (pvm:113829448) or (pvm:113829459) or (pvm:113829479)	pvm:113829446;pvm:113829448;pvm:113829459;pvm:113829479	rn00240	0	1000	0		2.4.1.224	Nucleotide metabolism	N
R07335	UDP-alpha-D-glucuronate:N-acetyl-alpha-D-glucosaminyl-(1->4)-beta-D-glucuronosyl-proteoglycan 4-beta-glucuronosyltransferase	C00167[c] + C15575[c] --> C00015[c] + C15576[c]	(pvm:113829491) or (pvm:113829491) or (pvm:113829491)	pvm:113829491;pvm:113829491;pvm:113829491	rn00040	0	1000	0		2.4.1.225	Carbohydrate metabolism	N
R07336	alpha-D-glucuronate:N-acetyl-beta-D-galactosaminyl-(1->4)-beta-D-glucuronosyl-proteoglycan 3-beta-glucuronosyltransferase	C00167[c] + C15577[c] --> C00015[c] + C15578[c]	(pvm:113830594)	pvm:113830594	rn01100	0	1000	0		2.4.1.226	Global and overview maps	N
R07343	myo-inositol-phosphate phosphohydrolase	C15585[c] + C00001[c] --> C00137[c] + C00009[c]	(pvm:113820052)	pvm:113820052	rn01100	0	1000	0		3.1.3.25	Global and overview maps	N
R07349	n-alkanal:NAD+ 2-oxidoreductase	C15596[c] + C00003[c] --> C15597[c] + C00004[c] + C00080[c]	(pvm:113820221) or (pvm:113820225) or (pvm:113821370) or (pvm:113821370) or (pvm:113821389) or (pvm:113821395)	pvm:113820221;pvm:113820225;pvm:113821370;pvm:113821370;pvm:113821389;pvm:113821395	rn00730	0	1000	0		1.3.1.74	Metabolism of cofactors and vitamins	N
R07354	5,6,7,8-tetrahydropteridine:NAD+ oxidoreductase	C05650[c] + C00003[c] --> C05649[c] + C00004[c] + C00080[c]	(pvm:113821236)	pvm:113821236	rn00730	0	1000	0		1.5.1.34	Metabolism of cofactors and vitamins	N
R07355	5,6,7,8-tetrahydropteridine:NADP+ oxidoreductase	C05650[c] + C00006[c] --> C05649[c] + C00005[c] + C00080[c]	(pvm:113821236)	pvm:113821236	rn00480	0	1000	0		1.5.1.34	Metabolism of other amino acids	N
R07360	S-prenyl-L-cysteine:oxygen oxidoreductase	C06751[c] + C00007[c] + C00001[c] --> C15604[c] + C00097[c] + C00027[c]	(pvm:113800373)	pvm:113800373	rn01100	0	1000	0		1.8.3.5	Global and overview maps	N
R07363	1,2-dihydroxy-5-(methylthio)pent-1-en-3-one:oxygen oxidoreductase (formate- and CO-forming)	C15606[c] + C00007[c] --> C08276[c] + C00058[c] + C00237[c]	(pvm:113810892) or (pvm:113810892)	pvm:113810892;pvm:113810892	rn00270	0	1000	0		1.13.11.53	Amino acid metabolism	N
R07364	1,2-dihydroxy-5-(methylthio)pent-1-en-3-one:oxygen oxidoreductase (formate-forming)	C15606[c] + C00007[c] --> C01180[c] + C00058[c]	(pvm:113810897) or (pvm:113812015)	pvm:113810897;pvm:113812015	rn00270	0	1000	0		1.13.11.54	Amino acid metabolism	N
R07376	L-1-phosphatidylethanolamine:L-serine phosphatidyltransferase	C00350[c] + C00065[c] --> C02737[c] + C00189[c]	(pvm:113825415)	pvm:113825415	rn00564	0	1000	0		2.7.8.29	Lipid metabolism	N
R07379	plasmenylethanolamine 2-acylhydrolase	C04756[c] + C00001[c] --> C04635[c] + C00060[c] + C00080[c]	(pvm:113800992) or (pvm:113800996) or (pvm:113801002) or (pvm:113801003) or (pvm:113801004) or (pvm:113801005) or (pvm:113801006)	pvm:113800992;pvm:113800996;pvm:113801002;pvm:113801003;pvm:113801004;pvm:113801005;pvm:113801006	rn00565	0	1000	0		3.1.1.4	Lipid metabolism	N
R07384		C04756[c] + C00055[c] <=> C03454[c] + C00570[c]	(pvm:113824240) or (pvm:113824240) or (pvm:113824281)	pvm:113824240;pvm:113824240;pvm:113824281	rn00565	-1000	1000	0		2.7.8.1	Lipid metabolism	Y
R07385		C04756[c] + C00001[c] --> C15647[c] + C00189[c]	(pvm:113824601) or (pvm:113824614) or (pvm:113824615) or (pvm:113824616) or (pvm:113824636) or (pvm:113824661) or (pvm:113825750) or (pvm:113825759) or (pvm:113825768) or (pvm:113825776)	pvm:113824601;pvm:113824614;pvm:113824615;pvm:113824616;pvm:113824636;pvm:113824661;pvm:113825750;pvm:113825759;pvm:113825768;pvm:113825776	rn00565	0	1000	0		3.1.4.4	Lipid metabolism	N
R07387	plasmanylcholine 2-acylhydrolase	C05212[c] + C00001[c] --> C04317[c] + C00060[c] + C00080[c]	(pvm:113800992) or (pvm:113800996) or (pvm:113801002) or (pvm:113801003) or (pvm:113801004) or (pvm:113801005) or (pvm:113801006)	pvm:113800992;pvm:113800996;pvm:113801002;pvm:113801003;pvm:113801004;pvm:113801005;pvm:113801006	rn00565	0	1000	0		3.1.1.4	Lipid metabolism	N
R07388	1-(1-Alkenyl)-sn-glycero-3-phosphoethanolamine ethanolaminehydrolase	C04635[c] + C00001[c] --> C15646[c] + C00189[c]	(pvm:113823507)	pvm:113823507	rn00565	0	1000	0		3.1.4.39	Lipid metabolism	N
R07389		C03201[c] + C00307[c] + C00080[c] --> C05212[c] + C00055[c]	(pvm:113825401)	pvm:113825401	rn00565	0	1000	0		2.7.8.2	Lipid metabolism	N
R07392	S-methyl-5-thio-D-ribulose-1-phosphate hydro-lyase	C04582[c] --> C15650[c] + C00001[c]	(pvm:113811566)	pvm:113811566	rn00270	0	1000	0		4.2.1.109	Amino acid metabolism	N
R07397	UDP-N-acetyl-D-glucosamine:beta-D-glucuronosyl-(1->3)-beta-D-galactosyl-(1->3)-beta-D-galactosyl-(1->4)-beta-D-xylosyl-proteoglycan;	C00043[c] + C04903[c] --> C00015[c] + C15656[c]	(pvm:113828399)	pvm:113828399	rn00240	0	1000	0		2.4.1.223	Nucleotide metabolism	N
R07400	cephalosporin C:oxygen oxidoreductase (deaminating)	C00916[c] + C00001[c] + C00007[c] --> C04712[c] + C00014[c] + C00027[c]	(pvm:113818896)	pvm:113818896	rn00311	0	1000	0		1.4.3.3	Biosynthesis of other secondary metabolites	N
R07407	L-aspartate:NADP+ oxidoreductase (deaminating)	C00049[c] + C00006[c] --> C05840[c] + C00005[c] + C00080[c]	(pvm:113818864)	pvm:113818864	rn00760	0	1000	0		1.4.1.21	Metabolism of cofactors and vitamins	N
R07410	L-aspartate:NAD+ oxidoreductase (deaminating)	C00049[c] + C00003[c] --> C05840[c] + C00004[c] + C00080[c]	(pvm:113818864)	pvm:113818864	rn00760	0	1000	0		1.4.1.21	Metabolism of cofactors and vitamins	N
R07411	(2E,6E)-farnesyl-diphosphate:protoheme IX farnesyltranstransferase	C00032[c] + C00001[c] + C00448[c] --> C15672[c] + C00013[c]	(pvm:113824173)	pvm:113824173	rn00860	0	1000	0		2.5.1.141	Metabolism of cofactors and vitamins	N
R07429	5alpha-campestan-3-one:NADP+ delta4-oxidoreductase	C15785[c] + C00005[c] + C00080[c] --> C15786[c] + C00006[c]	(pvm:113818992) or (pvm:113818994) or (pvm:113819003)	pvm:113818992;pvm:113818994;pvm:113819003	rn00905	0	1000	0		1.3.1.22	Metabolism of terpenoids and polyketides	N
R07447	22alpha-hydroxy-5alpha-campestan-3-one:NADP+ delta4-oxidoreductase	C15796[c] + C00005[c] + C00080[c] --> C15797[c] + C00006[c]	(pvm:113818992) or (pvm:113818994) or (pvm:113819003)	pvm:113818992;pvm:113818994;pvm:113819003	rn00905	0	1000	0		1.3.1.22	Metabolism of terpenoids and polyketides	N
R07460	L-cysteine:[enzyme]-cysteine sulfurtransferase	C15811[c] + C00097[c] --> C15812[c] + C00041[c]	(pvm:113823240)	pvm:113823240	rn00730	0	1000	0		2.8.1.7	Metabolism of cofactors and vitamins	N
R07477	spermidine:NAD+ oxidoreductase	C00315[c] + C00003[c] --> C15853[c] + C00004[c] + C00080[c]	(pvm:113800480)	pvm:113800480	rn00330	0	1000	0		2.5.1.46	Amino acid metabolism	N
R07478	[eIF5A-precursor]-deoxyhypusine:NAD+ oxidoreductase	C15854[c] + C00004[c] + C00080[c] --> C07282[c] + C00003[c]	(pvm:113800480)	pvm:113800480	rn01100	0	1000	0		2.5.1.46	Global and overview maps	N
R07479	dehydrospermidine:[enzyme]-lysine N-4-aminobutylidenetransferase	C15853[c] + C07281[c] --> C15854[c] + C00986[c]	(pvm:113800480)	pvm:113800480	rn01100	0	1000	0		2.5.1.46	Global and overview maps	N
R07480	N-(4-aminobutylidene)-[enzyme]-lysine:[eIF5A-precursor]-lysine N-4-aminobutylidenetransferase	C15854[c] + C07281[c] --> C15854[c] + C07281[c]	(pvm:113800480)	pvm:113800480	rn01100	0	1000	0		2.5.1.46	Global and overview maps	N
R07483		C11508[c] + C00005[c] + C00080[c] --> C15776[c] + C00006[c]	(pvm:113819078)	pvm:113819078	rn00100	0	1000	0		1.3.1.70	Lipid metabolism	N
R07486	delta7-avenasterol,ferrocytochrome b5:oxygen oxidoreductase 5,6-dehydrogenating	C15782[c] + 2 C00999[c] + C00007[c] + 2 C00080[c] --> C15783[c] + 2 C00996[c] + 2 C00001[c]	(pvm:113814287)	pvm:113814287	rn00100	0	1000	0		1.14.19.20	Lipid metabolism	N
R07487		C15783[c] + C00282[c] --> C08821[c]	(pvm:113817922)	pvm:113817922	rn00100	0	1000	0		1.3.1.21	Lipid metabolism	N
R07491	episterol,ferrocytochrome b5:oxygen oxidoreductase 5,6-dehydrogenating	C15777[c] + 2 C00999[c] + C00007[c] + 2 C00080[c] --> C15780[c] + 2 C00996[c] + 2 C00001[c]	(pvm:113814287)	pvm:113814287	rn00100	0	1000	0		1.14.19.20	Lipid metabolism	N
R07492		C15780[c] + C00282[c] --> C15781[c]	(pvm:113817922)	pvm:113817922	rn00100	0	1000	0		1.3.1.21	Lipid metabolism	N
R07495	4alpha-methylzymosterol:NADP+ 3-oxidoreductase	C15816[c] + C00005[c] + C00080[c] --> C05103[c] + C00006[c]	(pvm:113805268) or (pvm:113805292)	pvm:113805268;pvm:113805292	rn00100	0	1000	0		1.1.1.270	Lipid metabolism	N
R07498		C05437[c] + C00005[c] + C00080[c] <=> C03845[c] + C00006[c]	(pvm:113820205) or (pvm:113820218)	pvm:113820205;pvm:113820218	rn00100	-1000	1000	0		1.3.1.72	Lipid metabolism	Y
R07499		C05108[c] + C00005[c] + C00080[c] <=> C15915[c] + C00006[c]	(pvm:113820205) or (pvm:113820218)	pvm:113820205;pvm:113820218	rn00100	-1000	1000	0		1.3.1.72	Lipid metabolism	Y
R07505	episterol,ferrocytochrome b5:oxygen oxidoreductase 5,6-dehydrogenating	C15777[c] + 2 C00999[c] + C00007[c] + 2 C00080[c] --> C15778[c] + 2 C00996[c] + 2 C00001[c]	(pvm:113814287)	pvm:113814287	rn00100	0	1000	0		1.14.19.20	Lipid metabolism	N
R07507		C05107[c] + C00005[c] + C00080[c] <=> C01164[c] + C00006[c]	(pvm:113820205) or (pvm:113820218)	pvm:113820205;pvm:113820218	rn00100	-1000	1000	0		1.3.1.72	Lipid metabolism	Y
R07584	myo-inositol-hexakisphosphate 5-phosphohydrolase	C01204[c] + C00001[c] --> C15991[c] + C00009[c]	(pvm:113812681) or (pvm:113812701) or (pvm:113812701) or (pvm:113813801) or (pvm:113814985) or (pvm:113815005) or (pvm:113815006)	pvm:113812681;pvm:113812701;pvm:113812701;pvm:113813801;pvm:113814985;pvm:113815005;pvm:113815006	rn00562	0	1000	0		3.1.3.62	Carbohydrate metabolism	N
R07599		C00141[c] + C00068[c] --> C15976[c] + C00011[c]	(pvm:113815389) or (pvm:113816682)	pvm:113815389;pvm:113816682	rn00280	0	1000	0		1.2.4.4	Amino acid metabolism	N
R07600		C15976[c] + C15972[c] --> C15977[c] + C00068[c]	(pvm:113815389) or (pvm:113816682)	pvm:113815389;pvm:113816682	rn00280	0	1000	0		1.2.4.4	Amino acid metabolism	N
R07601		C00233[c] + C00068[c] --> C15974[c] + C00011[c]	(pvm:113815389) or (pvm:113816682)	pvm:113815389;pvm:113816682	rn00280	0	1000	0		1.2.4.4	Amino acid metabolism	N
R07602		C15974[c] + C15972[c] --> C15975[c] + C00068[c]	(pvm:113815389) or (pvm:113816682)	pvm:113815389;pvm:113816682	rn00280	0	1000	0		1.2.4.4	Amino acid metabolism	N
R07603		C00671[c] + C00068[c] --> C15978[c] + C00011[c]	(pvm:113815389) or (pvm:113816682)	pvm:113815389;pvm:113816682	rn00280	0	1000	0		1.2.4.4	Amino acid metabolism	N
R07604		C15978[c] + C15972[c] --> C15979[c] + C00068[c]	(pvm:113815389) or (pvm:113816682)	pvm:113815389;pvm:113816682	rn00280	0	1000	0		1.2.4.4	Amino acid metabolism	N
R07607	peptide-methionine:thioredoxin-disulfide S-oxidoreductase	C03023[c] + C00343[c] + C00001[c] --> C15653[c] + C00342[c]	(pvm:113801971) or (pvm:113801982) or (pvm:113801983) or (pvm:113802034)	pvm:113801971;pvm:113801982;pvm:113801983;pvm:113802034	rn01100	0	1000	0		1.8.4.12	Global and overview maps	N
R07618	enzyme N6-(dihydrolipoyl)lysine:NAD+ oxidoreductase	C15973[c] + C00003[c] <=> C15972[c] + C00004[c] + C00080[c]	(pvm:113829387) or (pvm:113829410)	pvm:113829387;pvm:113829410	rn00010	-1000	1000	0		1.8.1.4	Carbohydrate metabolism	Y
R07620		G10617[c] + C02189[c] --> G10622[c] + G13027[c]	(pvm:113814026) or (pvm:113814059) or (pvm:113814070) or (pvm:113814079) or (pvm:113814081)	pvm:113814026;pvm:113814059;pvm:113814070;pvm:113814079;pvm:113814081	rn00514	0	1000	0		2.4.1.109		N
R07627	cis-stilbene-oxide hydrolase	C16014[c] + C00001[c] --> C16015[c]	(pvm:113829078)	pvm:113829078	rn01100	0	1000	0		3.3.2.9	Global and overview maps	N
R07641		2 C00002[c] + C00288[c] + C00014[c] + C00080[c] --> 2 C00008[c] + C00009[c] + C00169[c]	(pvm:113827202)	pvm:113827202	rn00230	0	1000	0		6.3.5.5	Nucleotide metabolism	N
R07758		C00083[c] + C00154[c] --> C16216[c] + C00010[c] + C00011[c]	(pvm:113800113) or (pvm:113801269) or (pvm:113801272) or (pvm:113801275) or (pvm:113801277)	pvm:113800113;pvm:113801269;pvm:113801272;pvm:113801275;pvm:113801277	rn01040	0	1000	0		2.3.1.199	Lipid metabolism	N
R07759	3-hydroxyoctadecanoyl-CoA:NADP+ oxidoreductase	C16216[c] + C00005[c] + C00080[c] --> C16217[c] + C00006[c]	(pvm:113812189) or (pvm:113812201) or (pvm:113812212) or (pvm:113812217) or (pvm:113812226) or (pvm:113812227)	pvm:113812189;pvm:113812201;pvm:113812212;pvm:113812217;pvm:113812226;pvm:113812227	rn01040	0	1000	0		1.1.1.330	Lipid metabolism	N
R07760		C16217[c] --> C16218[c] + C00001[c]	(pvm:113812644) or (pvm:113813772)	pvm:113812644;pvm:113813772	rn01040	0	1000	0		4.2.1.134	Lipid metabolism	N
R07761	octadecanoyl-CoA:NADP+ trans-2-oxidoreductase	C16218[c] + C00005[c] + C00080[c] --> C00412[c] + C00006[c]	(pvm:113823674)	pvm:113823674	rn01040	0	1000	0		1.3.1.93	Lipid metabolism	N
R07806	N-acetyl-D-galactosamine 6-sulfate 6-sulfohydrolase	G01945[c] + C00001[c] --> G01977[c] + C00059[c]	(pvm:113828091)	pvm:113828091	rn00531	0	1000	0		3.1.6.4	Glycan biosynthesis and metabolism	N
R07807		G01977[c] + C00001[c] --> G13073[c] + C00124[c]	(pvm:113823164)	pvm:113823164	rn00531	0	1000	0		3.2.1.23	Glycan biosynthesis and metabolism	N
R07808	N-acetyl-D-glucosamine-6-sulfate 6-sulfohydrolase	G13073[c] + C00001[c] --> G13074[c] + C00059[c]	(pvm:113828090)	pvm:113828090	rn00531	0	1000	0		3.1.6.14	Glycan biosynthesis and metabolism	N
R07809		G13074[c] + C00001[c] --> G01391[c] + C00140[c]	(pvm:113823303) or (pvm:113823305) or (pvm:113823305) or (pvm:113823306) or (pvm:113823306) or (pvm:113823307) or (pvm:113823307) or (pvm:113823330) or (pvm:113823358) or (pvm:113824451) or (pvm:113824467)	pvm:113823303;pvm:113823305;pvm:113823305;pvm:113823306;pvm:113823306;pvm:113823307;pvm:113823307;pvm:113823330;pvm:113823358;pvm:113824451;pvm:113824467	rn00531	0	1000	0		3.2.1.52	Glycan biosynthesis and metabolism	N
R07810		G13073[c] + C00001[c] --> G01391[c] + C04132[c]	(pvm:113823303) or (pvm:113823305) or (pvm:113823305) or (pvm:113823306) or (pvm:113823306) or (pvm:113823307) or (pvm:113823307) or (pvm:113823330) or (pvm:113823358) or (pvm:113824451) or (pvm:113824467)	pvm:113823303;pvm:113823305;pvm:113823305;pvm:113823306;pvm:113823306;pvm:113823307;pvm:113823307;pvm:113823330;pvm:113823358;pvm:113824451;pvm:113824467	rn00531	0	1000	0		3.2.1.52	Glycan biosynthesis and metabolism	N
R07812	L-iduronate-2-sulfate 2-sulfohydrolase	G13034[c] + C00001[c] --> G13035[c] + C00059[c]	(pvm:113828085)	pvm:113828085	rn00531	0	1000	0		3.1.6.13	Glycan biosynthesis and metabolism	N
R07813		G13035[c] + C00001[c] --> G13036[c] + C06472[c]	(pvm:113824467)	pvm:113824467	rn00531	0	1000	0		3.2.1.76	Glycan biosynthesis and metabolism	N
R07814		G13036[c] + C00001[c] --> G13037[c] + C00059[c]	(pvm:113829181)	pvm:113829181	rn00531	0	1000	0		3.10.1.1	Glycan biosynthesis and metabolism	N
R07815	acetyl-CoA:heparan-alpha-D-glucosaminide N-acetyltransferase	C00024[c] + G13037[c] --> C00010[c] + G13038[c]	(pvm:113827487) or (pvm:113827514)	pvm:113827487;pvm:113827514	rn00531	0	1000	0		2.3.1.78	Glycan biosynthesis and metabolism	N
R07816		G13038[c] + C00001[c] --> G13039[c] + C00140[c]	(pvm:113828909)	pvm:113828909	rn00531	0	1000	0		3.2.1.50	Glycan biosynthesis and metabolism	N
R07818		G13040[c] + C00001[c] --> G09660[c] + C00191[c]	(pvm:113824311) or (pvm:113824330) or (pvm:113824340)	pvm:113824311;pvm:113824330;pvm:113824340	rn00531	0	1000	0		3.2.1.31	Glycan biosynthesis and metabolism	N
R07819	N-acetyl-D-glucosamine-6-sulfate 6-sulfohydrolase	G09660[c] + C00001[c] --> G02632[c] + C00059[c]	(pvm:113828090)	pvm:113828090	rn00531	0	1000	0		3.1.6.14	Glycan biosynthesis and metabolism	N
R07821	L-iduronate-2-sulfate 2-sulfohydrolase	G13041[c] + C00001[c] --> G13042[c] + C00059[c]	(pvm:113828085)	pvm:113828085	rn00531	0	1000	0		3.1.6.13	Glycan biosynthesis and metabolism	N
R07822		G13042[c] + C00001[c] --> G12336[c] + C06472[c]	(pvm:113824467)	pvm:113824467	rn00531	0	1000	0		3.2.1.76	Glycan biosynthesis and metabolism	N
R07823	N-acetyl-D-galactosamine-4-sulfate 4-sulfohydrolase	G12336[c] + C00001[c] --> G13043[c] + C00059[c]	(pvm:113826926) or (pvm:113826929) or (pvm:113826954) or (pvm:113826969) or (pvm:113828080)	pvm:113826926;pvm:113826929;pvm:113826954;pvm:113826969;pvm:113828080	rn00531	0	1000	0		3.1.6.12	Glycan biosynthesis and metabolism	N
R07824		G13043[c] + C00001[c] --> G00872[c] + C01074[c]	(pvm:113824355)	pvm:113824355	rn00531	0	1000	0		3.2.1.35	Glycan biosynthesis and metabolism	N
R07825		G12336[c] + C00001[c] --> G00872[c] + C16265[c]	(pvm:113824355)	pvm:113824355	rn00531	0	1000	0		3.2.1.35	Glycan biosynthesis and metabolism	N
R07888		C16327[c] + C00016[c] --> C16328[c] + C01352[c]	(pvm:113823684) or (pvm:113823690) or (pvm:113823704) or (pvm:113823712)	pvm:113823684;pvm:113823690;pvm:113823704;pvm:113823712	rn00592	0	1000	0		1.3.3.6	Lipid metabolism	N
R07891		C16331[c] + C00024[c] --> C00010[c] + C16330[c]	(pvm:113825167) or (pvm:113825170)	pvm:113825167;pvm:113825170	rn00592	0	1000	0		2.3.1.16	Lipid metabolism	N
R07892		C16331[c] + C00016[c] --> C16332[c] + C01352[c]	(pvm:113823684) or (pvm:113823690) or (pvm:113823704) or (pvm:113823712)	pvm:113823684;pvm:113823690;pvm:113823704;pvm:113823712	rn00592	0	1000	0		1.3.3.6	Lipid metabolism	N
R07895		C16335[c] + C00024[c] --> C00010[c] + C16334[c]	(pvm:113825167) or (pvm:113825170)	pvm:113825167;pvm:113825170	rn00592	0	1000	0		2.3.1.16	Lipid metabolism	N
R07896		C16335[c] + C00016[c] --> C16336[c] + C01352[c]	(pvm:113823684) or (pvm:113823690) or (pvm:113823704) or (pvm:113823712)	pvm:113823684;pvm:113823690;pvm:113823704;pvm:113823712	rn00592	0	1000	0		1.3.3.6	Lipid metabolism	N
R07899		C16339[c] + C00024[c] --> C00010[c] + C16338[c]	(pvm:113825167) or (pvm:113825170)	pvm:113825167;pvm:113825170	rn00592	0	1000	0		2.3.1.16	Lipid metabolism	N
R07934	(6Z,9Z,12Z,15Z,18Z,21Z)-tetracosahexaenoyl-CoA:oxygen 2-oxidoreductase	C16168[c] + C00007[c] --> C16374[c] + C00027[c]	(pvm:113823684) or (pvm:113823690) or (pvm:113823704) or (pvm:113823712)	pvm:113823684;pvm:113823690;pvm:113823704;pvm:113823712	rn01040	0	1000	0		1.3.3.6	Lipid metabolism	N
R07942	1-methylxanthine:oxygen oxidoreductase	C16358[c] + C00001[c] + C00007[c] --> C16359[c] + C00027[c]	(pvm:113819219) or (pvm:113820335) or (pvm:113820343) or (pvm:113820345) or (pvm:113820345) or (pvm:113820385) or (pvm:113820388) or (pvm:113821490)	pvm:113819219;pvm:113820335;pvm:113820343;pvm:113820345;pvm:113820345;pvm:113820385;pvm:113820388;pvm:113821490	rn00232	0	1000	0		1.17.3.2	Biosynthesis of other secondary metabolites	N
R07943		C13747[c] + 2 C00080[c] + 2 C05359[c] --> C16358[c] + C01438[c]	(pvm:113829697) or (pvm:113801218) or (pvm:113802729) or (pvm:113802766) or (pvm:113803893) or (pvm:113803906) or (pvm:113803903) or (pvm:113803928) or (pvm:113805029) or (pvm:113805029) or (pvm:113805053)	pvm:113829697;pvm:113801218;pvm:113802729;pvm:113802766;pvm:113803893;pvm:113803906;pvm:113803903;pvm:113803928;pvm:113805029;pvm:113805029;pvm:113805053	rn00232	0	1000	0		1.14.14.1	Biosynthesis of other secondary metabolites	N
R07950	(6Z,9Z,12Z,15Z,18Z)-tetracosapentaenoyl-CoA:oxygen 2-oxidoreductase	C16172[c] + C00007[c] --> C16387[c] + C00027[c]	(pvm:113823684) or (pvm:113823690) or (pvm:113823704) or (pvm:113823712)	pvm:113823684;pvm:113823690;pvm:113823704;pvm:113823712	rn01040	0	1000	0		1.3.3.6	Lipid metabolism	N
R07977	1,7-dimethylxanthine:oxygen oxidoreductase	C13747[c] + C00007[c] + C00001[c] --> C16356[c] + C00027[c]	(pvm:113819219) or (pvm:113820335) or (pvm:113820343) or (pvm:113820345) or (pvm:113820345) or (pvm:113820385) or (pvm:113820388) or (pvm:113821490)	pvm:113819219;pvm:113820335;pvm:113820343;pvm:113820345;pvm:113820345;pvm:113820385;pvm:113820388;pvm:113821490	rn00232	0	1000	0		1.17.3.2	Biosynthesis of other secondary metabolites	N
R07978	3,7-dimethylxanthine:oxygen oxidoreductase	C07480[c] + C00001[c] + C00007[c] --> C16360[c] + C00027[c]	(pvm:113819219) or (pvm:113820335) or (pvm:113820343) or (pvm:113820345) or (pvm:113820345) or (pvm:113820385) or (pvm:113820388) or (pvm:113821490)	pvm:113819219;pvm:113820335;pvm:113820343;pvm:113820345;pvm:113820345;pvm:113820385;pvm:113820388;pvm:113821490	rn00232	0	1000	0		1.17.3.2	Biosynthesis of other secondary metabolites	N
R07979	7-methylxanthine:oxygen oxidoreductase	C16353[c] + C00007[c] + C00001[c] --> C16355[c] + C00027[c]	(pvm:113819219) or (pvm:113820335) or (pvm:113820343) or (pvm:113820345) or (pvm:113820345) or (pvm:113820385) or (pvm:113820388) or (pvm:113821490)	pvm:113819219;pvm:113820335;pvm:113820343;pvm:113820345;pvm:113820345;pvm:113820385;pvm:113820388;pvm:113821490	rn00232	0	1000	0		1.17.3.2	Biosynthesis of other secondary metabolites	N
R07981		C16361[c] + C00007[c] + 2 C00001[c] --> C16362[c] + C00011[c] + C00027[c]	(pvm:113828324)	pvm:113828324	rn00232	0	1000	0		1.7.3.3	Biosynthesis of other secondary metabolites	N
R08091	7-methyl-3-oxo-6-octenoyl-CoA:acetyl-CoA C-acyltransferase	C16466[c] + C00010[c] --> C16470[c] + C00024[c]	(pvm:113825167) or (pvm:113825170)	pvm:113825167;pvm:113825170	rn00281	0	1000	0		2.3.1.16	Metabolism of terpenoids and polyketides	N
R08093	3-hydroxy-5-methylhex-4-enoyl-CoA hydro-lyase	C16468[c] + C00001[c] --> C16469[c]	(pvm:113813772) or (pvm:113813772)	pvm:113813772;pvm:113813772	rn00281	0	1000	0		4.2.1.17	Metabolism of terpenoids and polyketides	N
R08094	3-hydroxy-5-methylhex-4-enoyl-CoA:NAD+ oxidoreductase	C16469[c] + C00003[c] --> C16471[c] + C00004[c] + C00080[c]	(pvm:113813321) or (pvm:113814456)	pvm:113813321;pvm:113814456	rn00281	0	1000	0		1.1.1.35	Metabolism of terpenoids and polyketides	N
R08095	3-methylcrotonyl-CoA:acetyl-CoA C-acyltransferase	C16471[c] + C00010[c] --> C03069[c] + C00024[c]	(pvm:113825167) or (pvm:113825170)	pvm:113825167;pvm:113825170	rn00281	0	1000	0		2.3.1.16	Metabolism of terpenoids and polyketides	N
R08127	beta-D-glucuronoside glucuronosohydrolase	C04900[c] + C00001[c] --> C12632[c] + C00191[c]	(pvm:113824311) or (pvm:113824330) or (pvm:113824340)	pvm:113824311;pvm:113824330;pvm:113824340	rn00944	0	1000	0		3.2.1.31	Biosynthesis of other secondary metabolites	N
R08146	farnesal:NAD+ oxidoreductase	C03461[c] + C00003[c] + C00001[c] --> C16502[c] + C00004[c] + C00080[c]	(pvm:113825010) or (pvm:113825013) or (pvm:113826103) or (pvm:113826145) or (pvm:113826151) or (pvm:113826159) or (pvm:113826162) or (pvm:113816548)	pvm:113825010;pvm:113825013;pvm:113826103;pvm:113826145;pvm:113826151;pvm:113826159;pvm:113826162;pvm:113816548	rn00981	0	1000	0		1.2.1.3	Metabolism of terpenoids and polyketides	N
R08147	S-adenosyl-L-methionine:(2E,6E)-farnesoate O-methyltransferase	C16502[c] + C00019[c] --> C16503[c] + C00021[c]	(pvm:113801840)	pvm:113801840	rn00981	0	1000	0		2.1.1.325	Metabolism of terpenoids and polyketides	N
R08148	methyl (2E,6E)-farnesoate,[reduced NADPH---hemoprotein reductase]:oxygen oxidoreductase	C16503[c] + C03024[c] + C00007[c] --> C09694[c] + C03161[c] + C00001[c]	(pvm:113806097) or (pvm:113806104)	pvm:113806097;pvm:113806104	rn00981	0	1000	0		1.14.14.127	Metabolism of terpenoids and polyketides	N
R08151	S-adenosyl-L-methionine:juvenile hormone III acid O-methyltransferase	C16504[c] + C00019[c] --> C09694[c] + C00021[c]	(pvm:113801840)	pvm:113801840	rn00981	0	1000	0		2.1.1.325	Metabolism of terpenoids and polyketides	N
R08174	stearoyl-CoA hydrolase	C00412[c] + C00001[c] --> C00010[c] + C01530[c]	(pvm:113803399) or (pvm:113804504)	pvm:113803399;pvm:113804504	rn01040	0	1000	0		3.1.2.2	Lipid metabolism	N
R08175	Icosanoyl-CoA hydrolase	C02041[c] + C00001[c] --> C00010[c] + C06425[c]	(pvm:113803399) or (pvm:113804504)	pvm:113803399;pvm:113804504	rn01040	0	1000	0		3.1.2.2	Lipid metabolism	N
R08176	oleoyl-CoA hydrolase	C00510[c] + C00001[c] --> C00010[c] + C00712[c]	(pvm:113803399) or (pvm:113804504)	pvm:113803399;pvm:113804504	rn01040	0	1000	0		3.1.2.2	Lipid metabolism	N
R08177	Linoleoyl-CoA hydrolase	C02050[c] + C00001[c] --> C00010[c] + C01595[c]	(pvm:113803399) or (pvm:113804504)	pvm:113803399;pvm:113804504	rn01040	0	1000	0		3.1.2.2	Lipid metabolism	N
R08178		C16162[c] + C00001[c] --> C00010[c] + C06427[c]	(pvm:113803399) or (pvm:113804504)	pvm:113803399;pvm:113804504	rn01040	0	1000	0		3.1.2.2	Lipid metabolism	N
R08179	(5Z,8Z,11Z,14Z,17Z)-icosapentaenoyl-CoA hydrolase	C16165[c] + C00001[c] --> C00010[c] + C06428[c]	(pvm:113803399) or (pvm:113804504)	pvm:113803399;pvm:113804504	rn01040	0	1000	0		3.1.2.2	Lipid metabolism	N
R08180		C16169[c] + C00001[c] --> C00010[c] + C06429[c]	(pvm:113803399) or (pvm:113804504)	pvm:113803399;pvm:113804504	rn01040	0	1000	0		3.1.2.2	Lipid metabolism	N
R08181		C03035[c] + C00001[c] --> C00010[c] + C06426[c]	(pvm:113803399) or (pvm:113804504)	pvm:113803399;pvm:113804504	rn01040	0	1000	0		3.1.2.2	Lipid metabolism	N
R08182		C03595[c] + C00001[c] --> C00010[c] + C03242[c]	(pvm:113803399) or (pvm:113804504)	pvm:113803399;pvm:113804504	rn01040	0	1000	0		3.1.2.2	Lipid metabolism	N
R08183		C02249[c] + C00001[c] --> C00010[c] + C00219[c]	(pvm:113803399) or (pvm:113804504)	pvm:113803399;pvm:113804504	rn01040	0	1000	0		3.1.2.2	Lipid metabolism	N
R08193	N-Acetyl-D-glucosamine 1-phosphate 1,6-phosphomutase	C00357[c] <=> C04501[c]	(pvm:113817096) or (pvm:113820612)	pvm:113817096;pvm:113820612	rn00520	-1000	1000	0		5.4.2.3	Carbohydrate metabolism	Y
R08198		C02630[c] + C00003[c] --> C00026[c] + C00004[c] + C00080[c]	(pvm:113827588)	pvm:113827588	rn00730	0	1000	0		1.1.1.95	Metabolism of cofactors and vitamins	N
R08208	tetrahydrobiopterin:NADP+ oxidoreductase (6-pyruvoyltetrahydropterin-forming)	C00272[c] + 2 C00006[c] --> C03684[c] + 2 C00005[c] + 2 C00080[c]	(pvm:113811172)	pvm:113811172	rn00790	0	1000	0		1.1.1.153	Metabolism of cofactors and vitamins	N
R08218	L-serine:tRNASec ligase (AMP-forming)	C00002[c] + C00065[c] + C16636[c] --> C00020[c] + C00013[c] + C06481[c]	(pvm:113824102) or (pvm:113826435) or (pvm:113826450) or (pvm:113829840)	pvm:113824102;pvm:113826435;pvm:113826450;pvm:113829840	rn00970	0	1000	0		6.1.1.11	Aminoacyl-tRNA biosynthesis	N
R08220	capecitabine hydrolase	C12650[c] + C00001[c] --> C16635[c] + C16834[c] + C00011[c]	(pvm:113827729) or (pvm:113827743)	pvm:113827729;pvm:113827743	rn00983	0	1000	0		3.1.1.1	Xenobiotics biodegradation and metabolism	N
R08221	5'-deoxy-5-fluorocytidine aminohydrolase	C16635[c] + C00001[c] --> C12739[c] + C00014[c]	(pvm:113827551)	pvm:113827551	rn00983	0	1000	0		3.5.4.5	Xenobiotics biodegradation and metabolism	N
R08222	5'-deoxy-5-fluorouridine:phosphate deoxy-alpha-D-ribosyltransferase	C12739[c] + C00009[c] --> C07649[c] + C16637[c]	(pvm:113817275) or (pvm:113817275)	pvm:113817275;pvm:113817275	rn00983	0	1000	0		2.4.2.4	Xenobiotics biodegradation and metabolism	N
R08223	L-seryl-tRNA(Sec) kinase	C06481[c] + C00002[c] --> C16638[c] + C00008[c]	(pvm:113820667)	pvm:113820667	rn00450	0	1000	0		2.7.1.164	Metabolism of other amino acids	N
R08224	selenophosphate:O-phospho-L-seryl-tRNA(Sec) selenium transferase	C16638[c] + C05172[c] + C00001[c] --> C06482[c] + 2 C00009[c]	(pvm:113827715) or (pvm:113827726)	pvm:113827715;pvm:113827726	rn00450	0	1000	0		2.9.1.2	Metabolism of other amino acids	N
R08225		C12673[c] + C03024[c] + C00007[c] --> C07649[c] + C16835[c] + C03161[c] + C00001[c]	(pvm:113829697) or (pvm:113801218) or (pvm:113802729) or (pvm:113802766) or (pvm:113803893) or (pvm:113803906) or (pvm:113803903) or (pvm:113803928) or (pvm:113805029) or (pvm:113805029) or (pvm:113805053)	pvm:113829697;pvm:113801218;pvm:113802729;pvm:113802766;pvm:113803893;pvm:113803906;pvm:113803903;pvm:113803928;pvm:113805029;pvm:113805029;pvm:113805053	rn00983	0	1000	0		1.14.14.1	Xenobiotics biodegradation and metabolism	N
R08226	5,6-dihydro-5-fluorouracil:NADP+ 5-oxidoreductase	C07649[c] + C00005[c] + C00080[c] --> C16630[c] + C00006[c]	(pvm:113817899)	pvm:113817899	rn00983	0	1000	0		1.3.1.2	Xenobiotics biodegradation and metabolism	N
R08227	5,6-dihydro-5-fluorouracil amidohydrolase	C16630[c] + C00001[c] --> C16631[c]	(pvm:113807691)	pvm:113807691	rn00983	0	1000	0		3.5.2.2	Xenobiotics biodegradation and metabolism	N
R08228	alpha-fluoro-beta-ureidopropionic acid amidohydrolase	C16631[c] + C00001[c] --> C16632[c] + C00011[c] + C00014[c]	(pvm:113828695)	pvm:113828695	rn00983	0	1000	0		3.5.1.6	Xenobiotics biodegradation and metabolism	N
R08229	5-fluorouridine:phosphate alpha-D-ribosyltransferase	C07649[c] + C00620[c] <=> C16633[c] + C00009[c]	(pvm:113813471)	pvm:113813471	rn00983	-1000	1000	0		2.4.2.3	Xenobiotics biodegradation and metabolism	Y
R08230	5-fluorodeoxyuridine:phosphate deoxy-alpha-D-ribosyltransferase	C07649[c] + C00672[c] <=> C11736[c] + C00009[c]	(pvm:113817275) or (pvm:113817275)	pvm:113817275;pvm:113817275	rn00983	-1000	1000	0		2.4.2.4	Xenobiotics biodegradation and metabolism	Y
R08231	5-fluorouridine monophosphate:diphosphate phospho-alpha-D-ribosyl-transferase	C07649[c] + C00119[c] --> C16634[c] + C00013[c]	(pvm:113811244)	pvm:113811244	rn00983	0	1000	0		2.4.2.10	Xenobiotics biodegradation and metabolism	N
R08232	ATP:5-fluorouridine 5'-phosphotransferase	C16633[c] + C00002[c] --> C16634[c] + C00008[c]	(pvm:113803732) or (pvm:113803763)	pvm:113803732;pvm:113803763	rn00983	0	1000	0		2.7.1.48	Xenobiotics biodegradation and metabolism	N
R08233	ATP:5-fluorodeoxyuridine 5'-phosphotransferase	C11736[c] + C00002[c] --> C04242[c] + C00008[c]	(pvm:113799947)	pvm:113799947	rn00983	0	1000	0		2.7.1.21	Xenobiotics biodegradation and metabolism	N
R08235	6-mercaptopurin:oxygen oxidoreductase	C02380[c] + 2 C00001[c] + 2 C00007[c] --> C16613[c] + 2 C00027[c]	(pvm:113819219) or (pvm:113820335) or (pvm:113820343) or (pvm:113820345) or (pvm:113820345) or (pvm:113820385) or (pvm:113820388) or (pvm:113821490)	pvm:113819219;pvm:113820335;pvm:113820343;pvm:113820345;pvm:113820345;pvm:113820385;pvm:113820388;pvm:113821490	rn00983	0	1000	0		1.17.3.2	Xenobiotics biodegradation and metabolism	N
R08236	S-adenosyl-L-methionine:6-mercaptopurin S-methyltransferase	C02380[c] + C00019[c] --> C16614[c] + C00021[c]	(pvm:113818230) or (pvm:113818244)	pvm:113818230;pvm:113818244	rn00983	0	1000	0		2.1.1.67	Xenobiotics biodegradation and metabolism	N
R08237	6-thioinosine 5'-monophosphate:diphosphate phospho-D-ribosyltransferase	C02380[c] + C00119[c] --> C04646[c] + C00013[c]	(pvm:113818431) or (pvm:113819550)	pvm:113818431;pvm:113819550	rn00983	0	1000	0		2.4.2.8	Xenobiotics biodegradation and metabolism	N
R08238	6-methylthiopurine 5'-monophosphate ribonucleotide:diphosphate phospho-D-ribosyltransferase	C16614[c] + C00119[c] --> C16615[c] + C00013[c]	(pvm:113818431) or (pvm:113819550)	pvm:113818431;pvm:113819550	rn00983	0	1000	0		2.4.2.8	Xenobiotics biodegradation and metabolism	N
R08239	S-adenosyl-L-methionine:6-thioinosine 5'-monophosphate S-methyltransferase	C04646[c] + C00019[c] --> C16615[c] + C00021[c]	(pvm:113818230) or (pvm:113818244)	pvm:113818230;pvm:113818244	rn00983	0	1000	0		2.1.1.67	Xenobiotics biodegradation and metabolism	N
R08240	6-thioinosine 5'-monophosphate:NAD+ oxidoreductase	C04646[c] + C00003[c] + C00001[c] --> C16618[c] + C00004[c] + C00080[c]	(pvm:113800167)	pvm:113800167	rn00983	0	1000	0		1.1.1.205	Xenobiotics biodegradation and metabolism	N
R08244	6-thioxanthine 5'-monophosphate:L-glutamine amido-ligase (AMP-forming)	C16618[c] + C00002[c] + C00064[c] + C00001[c] --> C16619[c] + C00020[c] + C00013[c] + C00025[c]	(pvm:113805059)	pvm:113805059	rn00983	0	1000	0		6.3.5.2	Xenobiotics biodegradation and metabolism	N
R08245	6-thioguanosine monophosphate:diphosphate phospho-D-ribosyltransferase	C07648[c] + C00119[c] --> C16619[c] + C00013[c]	(pvm:113818431) or (pvm:113819550)	pvm:113818431;pvm:113819550	rn00983	0	1000	0		2.4.2.8	Xenobiotics biodegradation and metabolism	N
R08246	S-adenosyl-L-methionine:6-thioguanosine monophosphate S-methyltransferase	C16619[c] + C00019[c] --> C16620[c] + C00021[c]	(pvm:113818230) or (pvm:113818244)	pvm:113818230;pvm:113818244	rn00983	0	1000	0		2.1.1.67	Xenobiotics biodegradation and metabolism	N
R08255		C16641[c] + C00001[c] --> C11173[c] + C16836[c]	(pvm:113827729) or (pvm:113827743)	pvm:113827729;pvm:113827743	rn00983	0	1000	0		3.1.1.1	Xenobiotics biodegradation and metabolism	N
R08258		C16543[c] + C00001[c] --> C11173[c] + C16837[c]	(pvm:113827729) or (pvm:113827743)	pvm:113827729;pvm:113827743	rn00983	0	1000	0		3.1.1.1	Xenobiotics biodegradation and metabolism	N
R08259		C11173[c] + C00167[c] --> C11376[c] + C00015[c]	(pvm:113823738) or (pvm:113823745) or (pvm:113823747) or (pvm:113823748) or (pvm:113823750) or (pvm:113823750) or (pvm:113823785) or (pvm:113823789) or (pvm:113823789) or (pvm:113823792) or (pvm:113823795)	pvm:113823738;pvm:113823745;pvm:113823747;pvm:113823748;pvm:113823750;pvm:113823750;pvm:113823785;pvm:113823789;pvm:113823789;pvm:113823792;pvm:113823795	rn00983	0	1000	0		2.4.1.17	Xenobiotics biodegradation and metabolism	N
R08260	SN38 glucuronide glucuronosohydrolase	C11376[c] + C00001[c] --> C11173[c] + C00191[c]	(pvm:113824311) or (pvm:113824330) or (pvm:113824340)	pvm:113824311;pvm:113824330;pvm:113824340	rn00983	0	1000	0		3.2.1.31	Xenobiotics biodegradation and metabolism	N
R08261		C00167[c] + C06174[c] --> C00015[c] + C16577[c]	(pvm:113823738) or (pvm:113823745) or (pvm:113823747) or (pvm:113823748) or (pvm:113823750) or (pvm:113823750) or (pvm:113823785) or (pvm:113823789) or (pvm:113823789) or (pvm:113823792) or (pvm:113823795)	pvm:113823738;pvm:113823745;pvm:113823747;pvm:113823748;pvm:113823750;pvm:113823750;pvm:113823785;pvm:113823789;pvm:113823789;pvm:113823792;pvm:113823795	rn00982	0	1000	0		2.4.1.17	Xenobiotics biodegradation and metabolism	N
R08262		C01516[c] + C00167[c] --> C16643[c] + C00015[c]	(pvm:113823738) or (pvm:113823745) or (pvm:113823747) or (pvm:113823748) or (pvm:113823750) or (pvm:113823750) or (pvm:113823785) or (pvm:113823789) or (pvm:113823789) or (pvm:113823792) or (pvm:113823795)	pvm:113823738;pvm:113823745;pvm:113823747;pvm:113823748;pvm:113823750;pvm:113823750;pvm:113823785;pvm:113823789;pvm:113823789;pvm:113823792;pvm:113823795	rn00982	0	1000	0		2.4.1.17	Xenobiotics biodegradation and metabolism	N
R08263		C01516[c] + C00167[c] --> C16578[c] + C00015[c]	(pvm:113823738) or (pvm:113823745) or (pvm:113823747) or (pvm:113823748) or (pvm:113823750) or (pvm:113823750) or (pvm:113823785) or (pvm:113823789) or (pvm:113823789) or (pvm:113823792) or (pvm:113823795)	pvm:113823738;pvm:113823745;pvm:113823747;pvm:113823748;pvm:113823750;pvm:113823750;pvm:113823785;pvm:113823789;pvm:113823789;pvm:113823792;pvm:113823795	rn00982	0	1000	0		2.4.1.17	Xenobiotics biodegradation and metabolism	N
R08265		C01516[c] + C03024[c] + C00007[c] --> C11785[c] + C00067[c] + C03161[c] + C00001[c]	(pvm:113829697) or (pvm:113801218) or (pvm:113802729) or (pvm:113802766) or (pvm:113803893) or (pvm:113803906) or (pvm:113803903) or (pvm:113803928) or (pvm:113805029) or (pvm:113805029) or (pvm:113805053)	pvm:113829697;pvm:113801218;pvm:113802729;pvm:113802766;pvm:113803893;pvm:113803906;pvm:113803903;pvm:113803928;pvm:113805029;pvm:113805029;pvm:113805053	rn00982	0	1000	0		1.14.14.1	Xenobiotics biodegradation and metabolism	N
R08270		C16546[c] + C00005[c] + C00007[c] + C00080[c] --> C16547[c] + C00006[c] + C00001[c]	(pvm:113829697) or (pvm:113801218) or (pvm:113802729) or (pvm:113802766) or (pvm:113803893) or (pvm:113803906) or (pvm:113803903) or (pvm:113803928) or (pvm:113805029) or (pvm:113805029) or (pvm:113805053)	pvm:113829697;pvm:113801218;pvm:113802729;pvm:113802766;pvm:113803893;pvm:113803906;pvm:113803903;pvm:113803928;pvm:113805029;pvm:113805029;pvm:113805053	rn00982	0	1000	0		1.14.14.1	Xenobiotics biodegradation and metabolism	N
R08280	4-glutathionyl cyclophosphamide hydrolase	C07645[c] + C00051[c] --> C11583[c] + C00001[c]	(pvm:113825341) or (pvm:113825373) or (pvm:113825371) or (pvm:113826467) or (pvm:113826491) or (pvm:113826502) or (pvm:113827639) or (pvm:113827639) or (pvm:113827638) or (pvm:113827647) or (pvm:113827664) or (pvm:113827708) or (pvm:113827712) or (pvm:113827714) or (pvm:113828804) or (pvm:113828804) or (pvm:113828822) or (pvm:113829890) or (pvm:113829896) or (pvm:113829903) or (pvm:113829904) or …	pvm:113825341;pvm:113825373;pvm:113825371;pvm:113826467;pvm:113826491;pvm:113826502;pvm:113827639;pvm:113827639;pvm:113827638;pvm:113827647;pvm:113827664;pvm:113827708;pvm:113827712;pvm:113827714;pvm:113828804;pvm:113828804;pvm:113828822;pvm:113829890;pvm:113829896;pvm:113829903;pvm:113829904;pvm:113829943;pvm:113829946	rn00982	0	1000	0		2.5.1.18	Xenobiotics biodegradation and metabolism	N
R08281	alcophosphamide:NAD+ oxidoreductase	C07645[c] + C00004[c] + C00080[c] --> C16551[c] + C00003[c]	(pvm:113824313) or (pvm:113806470)	pvm:113824313;pvm:113806470	rn00982	0	1000	0		1.1.1.1	Xenobiotics biodegradation and metabolism	N
R08295	Monoethylglycinexylidide amidohydrolase	C16561[c] + C00001[c] --> C11004[c] + C11735[c]	(pvm:113827729) or (pvm:113827743)	pvm:113827729;pvm:113827743	rn00982	0	1000	0		3.1.1.1	Xenobiotics biodegradation and metabolism	N
R08300	Lidocaine amidohydrolase	C07073[c] + C00001[c] --> C11004[c] + C16647[c]	(pvm:113827729) or (pvm:113827743)	pvm:113827729;pvm:113827743	rn00982	0	1000	0		3.1.1.1	Xenobiotics biodegradation and metabolism	N
R08306	2-phenyl-1,3-propanediol monocarbamate:NAD+ oxidoreductase	C16586[c] + C00003[c] --> C16587[c] + C00004[c] + C00080[c]	(pvm:113824313) or (pvm:113806470)	pvm:113824313;pvm:113806470	rn00982	0	1000	0		1.1.1.1	Xenobiotics biodegradation and metabolism	N
R08310	4-hydroxy-5-phenyltetrahydro-1,3-oxazin-2-one:NAD+ oxidoreductase	C16595[c] + C00003[c] --> C16596[c] + C00004[c] + C00080[c]	(pvm:113824313) or (pvm:113806470)	pvm:113824313;pvm:113806470	rn00982	0	1000	0		1.1.1.1	Xenobiotics biodegradation and metabolism	N
R08344		C07572[c] + C00001[c] --> C16607[c] + 2 C00080[c] + 2 C05359[c]	(pvm:113829697) or (pvm:113801218) or (pvm:113802729) or (pvm:113802766) or (pvm:113803893) or (pvm:113803906) or (pvm:113803903) or (pvm:113803928) or (pvm:113805029) or (pvm:113805029) or (pvm:113805053)	pvm:113829697;pvm:113801218;pvm:113802729;pvm:113802766;pvm:113803893;pvm:113803906;pvm:113803903;pvm:113803928;pvm:113805029;pvm:113805029;pvm:113805053	rn00982	0	1000	0		1.14.14.1	Xenobiotics biodegradation and metabolism	N
R08345		C16608[c] + 2 C00080[c] + 2 C05359[c] --> C16609[c] + C01438[c]	(pvm:113829697) or (pvm:113801218) or (pvm:113802729) or (pvm:113802766) or (pvm:113803893) or (pvm:113803906) or (pvm:113803903) or (pvm:113803928) or (pvm:113805029) or (pvm:113805029) or (pvm:113805053)	pvm:113829697;pvm:113801218;pvm:113802729;pvm:113802766;pvm:113803893;pvm:113803906;pvm:113803903;pvm:113803928;pvm:113805029;pvm:113805029;pvm:113805053	rn00982	0	1000	0		1.14.14.1	Xenobiotics biodegradation and metabolism	N
R08346	Citalopram:oxygen oxidoreductase(deaminating)(flavin-containing)	C07572[c] + C00007[c] + C00001[c] --> C16612[c] + C00543[c] + C00027[c]	(pvm:113818908)	pvm:113818908	rn00982	0	1000	0		1.4.3.4	Xenobiotics biodegradation and metabolism	N
R08347	Demethylcitalopram:oxygen oxidoreductase(deaminating)(flavin-containing)	C16608[c] + C00007[c] + C00001[c] --> C16612[c] + C00218[c] + C00027[c]	(pvm:113818908)	pvm:113818908	rn00982	0	1000	0		1.4.3.4	Xenobiotics biodegradation and metabolism	N
R08348	didemethylcitalopram:oxygen oxidoreductase(deaminating)(flavin-containing)	C16609[c] + C00001[c] + C00007[c] --> C16612[c] + C00014[c] + C00027[c]	(pvm:113818908)	pvm:113818908	rn00982	0	1000	0		1.4.3.4	Xenobiotics biodegradation and metabolism	N
R08359	S-adenosylmethioninamine:cadaverine 3-aminopropyltransferase	C01137[c] + C01672[c] --> C00170[c] + C16565[c] + C00080[c]	(pvm:113824173)	pvm:113824173	rn00480	0	1000	0		2.5.1.16	Metabolism of other amino acids	N
R08363	2'-deoxyribonucleoside-diphosphate:tryparedoxin-disulfide 2'-oxidoreductase	C04232[c] + C16664[c] + C00001[c] --> C03723[c] + C16663[c]	(pvm:113821498)	pvm:113821498	rn00480	0	1000	0		1.17.4.1	Metabolism of other amino acids	N
R08364	2'-deoxyribonucleoside-diphosphate:trypanothione-disulfide 2'-oxidoreductase	C04232[c] + C03170[c] + C00001[c] --> C03723[c] + C02090[c]	(pvm:113821498)	pvm:113821498	rn00480	0	1000	0		1.17.4.1	Metabolism of other amino acids	N
R08381	Palmitoyl-CoA:retinol O-acyltransferase	C00154[c] + C00899[c] --> C00010[c] + C03455[c]	(pvm:113827476)	pvm:113827476	rn00830	0	1000	0		2.3.1.76	Metabolism of cofactors and vitamins	N
R08511	R-nitrile:glutathione R-transferase	C00726[c] + C00051[c] --> C01326[c] + C02320[c]	(pvm:113825341) or (pvm:113825373) or (pvm:113825371) or (pvm:113826467) or (pvm:113826491) or (pvm:113826502) or (pvm:113827639) or (pvm:113827639) or (pvm:113827638) or (pvm:113827647) or (pvm:113827664) or (pvm:113827708) or (pvm:113827712) or (pvm:113827714) or (pvm:113828804) or (pvm:113828804) or (pvm:113828822) or (pvm:113829890) or (pvm:113829896) or (pvm:113829903) or (pvm:113829904) or …	pvm:113825341;pvm:113825373;pvm:113825371;pvm:113826467;pvm:113826491;pvm:113826502;pvm:113827639;pvm:113827639;pvm:113827638;pvm:113827647;pvm:113827664;pvm:113827708;pvm:113827712;pvm:113827714;pvm:113828804;pvm:113828804;pvm:113828822;pvm:113829890;pvm:113829896;pvm:113829903;pvm:113829904;pvm:113829943;pvm:113829946	rn00270	0	1000	0		2.5.1.18	Amino acid metabolism	N
R08512	R-sulfate-ester:glutathione R-transferase	C16738[c] + C00051[c] --> C00059[c] + C02320[c]	(pvm:113825341) or (pvm:113825373) or (pvm:113825371) or (pvm:113826467) or (pvm:113826491) or (pvm:113826502) or (pvm:113827639) or (pvm:113827639) or (pvm:113827638) or (pvm:113827647) or (pvm:113827664) or (pvm:113827708) or (pvm:113827712) or (pvm:113827714) or (pvm:113828804) or (pvm:113828804) or (pvm:113828822) or (pvm:113829890) or (pvm:113829896) or (pvm:113829903) or (pvm:113829904) or …	pvm:113825341;pvm:113825373;pvm:113825371;pvm:113826467;pvm:113826491;pvm:113826502;pvm:113827639;pvm:113827639;pvm:113827638;pvm:113827647;pvm:113827664;pvm:113827708;pvm:113827712;pvm:113827714;pvm:113828804;pvm:113828804;pvm:113828822;pvm:113829890;pvm:113829896;pvm:113829903;pvm:113829904;pvm:113829943;pvm:113829946	rn00270	0	1000	0		2.5.1.18	Amino acid metabolism	N
R08527	Arachidonate 5-lipoxygenase	C00219[c] + C00007[c] --> C00909[c] + C00001[c]	(pvm:113809704)	pvm:113809704	rn00590	0	1000	0		1.13.11.34	Lipid metabolism	N
R08539	NADPH:ferricytochrome-b5 oxidoreductase	C00005[c] + 2 C00996[c] --> C00006[c] + 2 C00999[c]	(pvm:113827174)	pvm:113827174	rn00480	0	1000	0		1.6.2.4	Metabolism of other amino acids	N
R08550	protein N6-(dihydrolipoyl)lysine:NAD+ oxidoreductase	C16832[c] + C00003[c] --> C16237[c] + C00004[c] + C00080[c]	(pvm:113829387) or (pvm:113829410)	pvm:113829387;pvm:113829410	rn00730	0	1000	0		1.8.1.4	Metabolism of cofactors and vitamins	N
R08551	cytochrome P-450 reductase	C03161[c] + C00005[c] + C00080[c] --> C03024[c] + C00006[c]	(pvm:113827174)	pvm:113827174	rn00480	0	1000	0		1.6.2.4	Metabolism of other amino acids	N
R08557		C00114[c] + C00003[c] --> C00576[c] + C00004[c] + C00080[c]	(pvm:113824313) or (pvm:113806470)	pvm:113824313;pvm:113806470	rn00260	0	1000	0		1.1.1.1	Amino acid metabolism	N
R08558		C00114[c] + C00006[c] --> C00576[c] + C00005[c] + C00080[c]	(pvm:113824313) or (pvm:113806470)	pvm:113824313;pvm:113806470	rn00260	0	1000	0		1.1.1.1	Amino acid metabolism	N
R08572	ATP:(R)-glycerate 2-phosphotransferase	C00258[c] + C00002[c] --> C00631[c] + C00008[c]	(pvm:113800855) or (pvm:113800896)	pvm:113800855;pvm:113800896	rn00030	0	1000	0		2.7.1.165	Carbohydrate metabolism	N
R08602	S-palmitoylprotein hydrolase	C17202[c] + C00001[c] --> C00249[c] + C02743[c]	(pvm:113800811) or (pvm:113800811) or (pvm:113800812)	pvm:113800811;pvm:113800811;pvm:113800812	rn01100	0	1000	0		3.1.2.22	Global and overview maps	N
R08613	beta-D-mannoside mannohydrolase	C02478[c] + C00001[c] --> C01335[c] + C00159[c]	(pvm:113823188)	pvm:113823188	rn00052	0	1000	0		3.2.1.25	Carbohydrate metabolism	N
R08615	UDP-glucuronate glucuronohydrolase	C00167[c] + C00001[c] --> C00015[c] + C00191[c]	(pvm:113823738) or (pvm:113823745) or (pvm:113823747) or (pvm:113823748) or (pvm:113823750) or (pvm:113823750) or (pvm:113823785) or (pvm:113823789) or (pvm:113823789) or (pvm:113823792) or (pvm:113823795)	pvm:113823738;pvm:113823745;pvm:113823747;pvm:113823748;pvm:113823750;pvm:113823750;pvm:113823785;pvm:113823789;pvm:113823789;pvm:113823792;pvm:113823795	rn00053	0	1000	0		2.4.1.17	Carbohydrate metabolism	N
R08632	L-cystathionine cysteine-lyase	C02291[c] --> C00097[c] + C17234[c]	(pvm:113829361)	pvm:113829361	rn00260	0	1000	0		4.4.1.1	Amino acid metabolism	N
R08657	sn-glycerol 3-phosphate:ubiquinone oxidoreductase	C00093[c] + C00399[c] --> C00111[c] + C00390[c]	(pvm:113827608) or (pvm:113827616)	pvm:113827608;pvm:113827616	rn00010	0	1000	0		1.1.5.3	Carbohydrate metabolism	N
R08678	S-sulfanylglutathione:oxygen oxidoreductase	C17267[c] + C00007[c] + C00001[c] --> C00051[c] + C00094[c]	(pvm:113807453) or (pvm:113808559)	pvm:113807453;pvm:113808559	rn00920	0	1000	0		1.13.11.18	Energy metabolism	N
R08707	N-linked-glycopeptide-(N-acetyl-beta-D-glucosaminyl)-L-asparagine amidohydrolase	C04375[c] + C00001[c] --> C01239[c] + C02871[c]	(pvm:113828689)	pvm:113828689	rn01100	0	1000	0		3.5.1.52	Global and overview maps	N
R08717		G00309[c] + C00001[c] --> G00319[c] + C00159[c]	(pvm:113823163) or (pvm:113823180) or (pvm:113823180) or (pvm:113823181) or (pvm:113823188)	pvm:113823163;pvm:113823180;pvm:113823180;pvm:113823181;pvm:113823188	rn01100	0	1000	0		3.2.1.24	Global and overview maps	N
R08718		G00595[c] + C00001[c] --> G00971[c] + C00159[c]	(pvm:113823163) or (pvm:113823180) or (pvm:113823180) or (pvm:113823181) or (pvm:113823188)	pvm:113823163;pvm:113823180;pvm:113823180;pvm:113823181;pvm:113823188	rn01100	0	1000	0		3.2.1.24	Global and overview maps	N
R08765	deoxyribocyclobutadithymine thymine-lyase	C17509[c] <=> C17510[c]	(pvm:113805809) or (pvm:113806957) or (pvm:113806982)	pvm:113805809;pvm:113806957;pvm:113806982	rn01100	-1000	1000	0		4.1.99.3	Global and overview maps	Y
R08924	butanoyl-CoA:carbon-dioxide ligase (ADP-forming)	C00002[c] + C00288[c] + C00136[c] + C00080[c] --> C00008[c] + C00009[c] + C18026[c]	(pvm:113804087) or (pvm:113808626) or (pvm:113818123)	pvm:113804087;pvm:113808626;pvm:113818123	rn00230	0	1000	0		6.4.1.3	Nucleotide metabolism	N
R08945	11beta,17beta-dihydroxy-4-androsten-3-one:NAD+ 17-oxidoreductase	C18075[c] + C00003[c] --> C05284[c] + C00004[c] + C00080[c]	(pvm:113821791) or (pvm:113821820) or (pvm:113822943) or (pvm:113822949) or (pvm:113822950) or (pvm:113822957) or (pvm:113822972) or (pvm:113822976) or (pvm:113822977) or (pvm:113822977) or (pvm:113822979) or (pvm:113824088) or (pvm:113824094)	pvm:113821791;pvm:113821820;pvm:113822943;pvm:113822949;pvm:113822950;pvm:113822957;pvm:113822972;pvm:113822976;pvm:113822977;pvm:113822977;pvm:113822979;pvm:113824088;pvm:113824094	rn00140	0	1000	0		1.1.1.62	Lipid metabolism	N
R08954	5alpha-dihydrodeoxycorticosterone:NADP+ delta4-oxidoreductase	C03205[c] + C00005[c] + C00080[c] --> C18040[c] + C00006[c]	(pvm:113818992) or (pvm:113818994) or (pvm:113819003)	pvm:113818992;pvm:113818994;pvm:113819003	rn00140	0	1000	0		1.3.1.22	Lipid metabolism	N
R08964	ATP:1D-myo-inositol-5-diphosphate-pentakisphosphate phosphotransferase	C00002[c] + C11526[c] --> C00008[c] + C20690[c]	(pvm:113819943) or (pvm:113819961)	pvm:113819943;pvm:113819961	rn04070	0	1000	0		2.7.4.24		N
R08969	ceramide:phosphatidylcholine cholinephosphotransferase	C00195[c] + C00157[c] + C00080[c] <=> C00550[c] + C00641[c]	(pvm:113825378)	pvm:113825378	rn00600	-1000	1000	0		2.7.8.27	Lipid metabolism	Y
R08980	11beta,17beta-dihydroxy-4-androsten-3-one:NADP+ 17-oxidoreductase	C18075[c] + C00006[c] --> C05284[c] + C00005[c] + C00080[c]	(pvm:113821791) or (pvm:113821820) or (pvm:113822943) or (pvm:113822949) or (pvm:113822950) or (pvm:113822957) or (pvm:113822972) or (pvm:113822976) or (pvm:113822977) or (pvm:113822977) or (pvm:113822979) or (pvm:113824088) or (pvm:113824094)	pvm:113821791;pvm:113821820;pvm:113822943;pvm:113822949;pvm:113822950;pvm:113822957;pvm:113822972;pvm:113822976;pvm:113822977;pvm:113822977;pvm:113822979;pvm:113824088;pvm:113824094	rn00140	0	1000	0		1.1.1.62	Lipid metabolism	N
R08981	1-phosphatidyl-1D-myo-inositol-4,5-bisphosphate 4-phosphohydrolase	C04637[c] + C00001[c] --> C11557[c] + C00009[c]	(pvm:113817572) or (pvm:113817581)	pvm:113817572;pvm:113817581	rn04070	0	1000	0		3.1.3.78		N
R09030	D-allose-6-phosphate aldose-ketose-isomerase	C02962[c] --> C18096[c]	(pvm:113813149)	pvm:113813149	rn00051	0	1000	0		5.3.1.6	Carbohydrate metabolism	N
R09068	chlorophyll chlorophyllidohydrolase	C05307[c] + C00001[c] --> C16541[c] + C01389[c]	(pvm:113828882)	pvm:113828882	rn00860	0	1000	0		3.1.1.14	Metabolism of cofactors and vitamins	N
R09087	ATP:1D-myo-inositol-hexakisphosphate 5-phosphotransferase	C00002[c] + C01204[c] --> C00008[c] + C11526[c]	(pvm:113819933) or (pvm:113819942)	pvm:113819933;pvm:113819942	rn04070	0	1000	0		2.7.4.21		N
R09099	5,10-methylenetetrahydromethanopterin:glycine hydroxymethyltransferase	C00065[c] + C01217[c] --> C04377[c] + C00037[c] + C00001[c]	(pvm:113820593) or (pvm:113820596)	pvm:113820593;pvm:113820596	rn00680	0	1000	0		2.1.2.1	Energy metabolism	N
R09249	(2E,6E)-farnesyl-diphosphate:isopentenyl-diphosphate farnesyltranstransferase (adding 7 isopentenyl units)	C00448[c] + 7 C00129[c] --> C17432[c] + 7 C00013[c]	(pvm:113805409)	pvm:113805409	rn00900	0	1000	0		2.5.1.91	Metabolism of terpenoids and polyketides	N
R09295	GDP-beta-L-fucose:polypeptide O-alpha-L-fucosyltransferase	G10615[c] + C02189[c] --> G10620[c] + G13052[c]	(pvm:113828387) or (pvm:113828392)	pvm:113828387;pvm:113828392	rn00514	0	1000	0		2.4.1.221	Glycan biosynthesis and metabolism	N
R09296	UDP-D-GlcNAc:O-L-fucosylpeptide 3-beta-N-acetyl-D-glucosaminyltransferase	G10610[c] + G13052[c] --> G10619[c] + G13053[c]	(pvm:113828393)	pvm:113828393	rn00514	0	1000	0		2.4.1.222	Glycan biosynthesis and metabolism	N
R09304		G10610[c] + C02189[c] --> G10619[c] + G12573[c]	(pvm:113802141) or (pvm:113802152)	pvm:113802141;pvm:113802152	rn00514	0	1000	0		2.4.1.255	Glycan biosynthesis and metabolism	N
R09315		G10608[c] + C02189[c] --> G10619[c] + G13051[c]	(pvm:113823588)	pvm:113823588	rn00514	0	1000	0		2.4.1.376	Glycan biosynthesis and metabolism	N
R09318		G10615[c] + G00179[c] --> G10620[c] + G13056[c]	(pvm:113826070) or (pvm:113827196) or (pvm:113827199) or (pvm:113827210)	pvm:113826070;pvm:113827196;pvm:113827199;pvm:113827210	rn00513	0	1000	0		2.4.1.214	Glycan biosynthesis and metabolism	N
R09319		G10615[c] + G00014[c] --> G10620[c] + G10770[c]	(pvm:113829327) or (pvm:113829328) or (pvm:113830463) or (pvm:113830466) or (pvm:113830466) or (pvm:113803268) or (pvm:113803273) or (pvm:113804373) or (pvm:113804383) or (pvm:113804403) or (pvm:113805464) or (pvm:113805477) or (pvm:113805489) or (pvm:113805490) or (pvm:113805507)	pvm:113829327;pvm:113829328;pvm:113830463;pvm:113830466;pvm:113830466;pvm:113803268;pvm:113803273;pvm:113804373;pvm:113804383;pvm:113804403;pvm:113805464;pvm:113805477;pvm:113805489;pvm:113805490;pvm:113805507	rn00513	0	1000	0		2.4.1.68	Glycan biosynthesis and metabolism	N
R09323		G13057[c] + C00001[c] --> C00140[c] + G13058[c]	(pvm:113823303) or (pvm:113823305) or (pvm:113823305) or (pvm:113823306) or (pvm:113823306) or (pvm:113823307) or (pvm:113823307) or (pvm:113823330) or (pvm:113823358) or (pvm:113824451) or (pvm:113824467)	pvm:113823303;pvm:113823305;pvm:113823305;pvm:113823306;pvm:113823306;pvm:113823307;pvm:113823307;pvm:113823330;pvm:113823358;pvm:113824451;pvm:113824467	rn00513	0	1000	0		3.2.1.52	Glycan biosynthesis and metabolism	N
R09372	methaneselenol:NADP+ oxidoreductase	2 C00005[c] + 2 C00080[c] + C18902[c] --> 2 C00006[c] + 2 C00001[c] + C05703[c]	(pvm:113830545)	pvm:113830545	rn00450	0	1000	0		1.8.1.9	Metabolism of other amino acids	N
R09382	CTP,CTP,ATP:tRNA cytidylyl,cytidylyl,adenylyltransferase	C02211[c] + 2 C00063[c] + C00002[c] --> C19085[c] + 3 C00013[c]	(pvm:113820845)	pvm:113820845	rn01100	0	1000	0		2.7.7.72	Global and overview maps	N
R09395	thiocarboxylated molybdopterin synthase:cyclic pyranopterin phosphate sulfurtransferase	C18239[c] + 2 C15814[c] --> C05924[c] + 2 C15810[c]	(pvm:113820989) or (pvm:113822123)	pvm:113820989;pvm:113822123	rn00790	0	1000	0		2.8.1.12	Metabolism of cofactors and vitamins	N
R09405		C06800[c] + C00007[c] + C00005[c] + C00080[c] --> C16756[c] + C00001[c] + C00006[c]	(pvm:113829697) or (pvm:113801218) or (pvm:113802729) or (pvm:113802766) or (pvm:113803893) or (pvm:113803906) or (pvm:113803903) or (pvm:113803928) or (pvm:113805029) or (pvm:113805029) or (pvm:113805053)	pvm:113829697;pvm:113801218;pvm:113802729;pvm:113802766;pvm:113803893;pvm:113803906;pvm:113803903;pvm:113803928;pvm:113805029;pvm:113805029;pvm:113805053	rn00980	0	1000	0		1.14.14.1	Xenobiotics biodegradation and metabolism	N
R09406		C16756[c] + C00007[c] + C00005[c] + C00080[c] --> C19594[c] + C00001[c] + C00006[c]	(pvm:113829697) or (pvm:113801218) or (pvm:113802729) or (pvm:113802766) or (pvm:113803893) or (pvm:113803906) or (pvm:113803903) or (pvm:113803928) or (pvm:113805029) or (pvm:113805029) or (pvm:113805053)	pvm:113829697;pvm:113801218;pvm:113802729;pvm:113802766;pvm:113803893;pvm:113803906;pvm:113803903;pvm:113803928;pvm:113805029;pvm:113805029;pvm:113805053	rn00980	0	1000	0		1.14.14.1	Xenobiotics biodegradation and metabolism	N
R09407		C06800[c] + C00007[c] + C00005[c] + C00080[c] --> C19595[c] + C00001[c] + C00006[c]	(pvm:113829697) or (pvm:113801218) or (pvm:113802729) or (pvm:113802766) or (pvm:113803893) or (pvm:113803906) or (pvm:113803903) or (pvm:113803928) or (pvm:113805029) or (pvm:113805029) or (pvm:113805053)	pvm:113829697;pvm:113801218;pvm:113802729;pvm:113802766;pvm:113803893;pvm:113803906;pvm:113803903;pvm:113803928;pvm:113805029;pvm:113805029;pvm:113805053	rn00980	0	1000	0		1.14.14.1	Xenobiotics biodegradation and metabolism	N
R09409	glutathione-S-transferase	C19586[c] + C00051[c] --> C11278[c]	(pvm:113825341) or (pvm:113825373) or (pvm:113825371) or (pvm:113826467) or (pvm:113826491) or (pvm:113826502) or (pvm:113827639) or (pvm:113827639) or (pvm:113827638) or (pvm:113827647) or (pvm:113827664) or (pvm:113827708) or (pvm:113827712) or (pvm:113827714) or (pvm:113828804) or (pvm:113828804) or (pvm:113828822) or (pvm:113829890) or (pvm:113829896) or (pvm:113829903) or (pvm:113829904) or …	pvm:113825341;pvm:113825373;pvm:113825371;pvm:113826467;pvm:113826491;pvm:113826502;pvm:113827639;pvm:113827639;pvm:113827638;pvm:113827647;pvm:113827664;pvm:113827708;pvm:113827712;pvm:113827714;pvm:113828804;pvm:113828804;pvm:113828822;pvm:113829890;pvm:113829896;pvm:113829903;pvm:113829904;pvm:113829943;pvm:113829946	rn00980	0	1000	0		2.5.1.18	Xenobiotics biodegradation and metabolism	N
R09410	epoxide hydrolase	C19586[c] + C00001[c] --> C19588[c]	(pvm:113829078)	pvm:113829078	rn00980	0	1000	0		3.3.2.9	Xenobiotics biodegradation and metabolism	N
R09416		C19488[c] + C00007[c] + C00005[c] + C00080[c] --> C19489[c] + C00001[c] + C00006[c]	(pvm:113829697) or (pvm:113801218) or (pvm:113802729) or (pvm:113802766) or (pvm:113803893) or (pvm:113803906) or (pvm:113803903) or (pvm:113803928) or (pvm:113805029) or (pvm:113805029) or (pvm:113805053)	pvm:113829697;pvm:113801218;pvm:113802729;pvm:113802766;pvm:113803893;pvm:113803906;pvm:113803903;pvm:113803928;pvm:113805029;pvm:113805029;pvm:113805053	rn00980	0	1000	0		1.14.14.1	Xenobiotics biodegradation and metabolism	N
R09417	microsomal epoxide hydrolase	C19489[c] + C00001[c] --> C19490[c]	(pvm:113829078)	pvm:113829078	rn00980	0	1000	0		3.3.2.9	Xenobiotics biodegradation and metabolism	N
R09418		C19490[c] + C00007[c] + C00005[c] + C00080[c] --> C19559[c] + C00001[c] + C00006[c]	(pvm:113829697) or (pvm:113801218) or (pvm:113802729) or (pvm:113802766) or (pvm:113803893) or (pvm:113803906) or (pvm:113803903) or (pvm:113803928) or (pvm:113805029) or (pvm:113805029) or (pvm:113805053)	pvm:113829697;pvm:113801218;pvm:113802729;pvm:113802766;pvm:113803893;pvm:113803906;pvm:113803903;pvm:113803928;pvm:113805029;pvm:113805029;pvm:113805053	rn00980	0	1000	0		1.14.14.1	Xenobiotics biodegradation and metabolism	N
R09419	acyl-CoA:malonyl-CoA C-acyltransferase (decarboxylating)	C00083[c] + C00040[c] --> C00264[c] + C00010[c] + C00011[c]	(pvm:113800113) or (pvm:113801269) or (pvm:113801272) or (pvm:113801275) or (pvm:113801277)	pvm:113800113;pvm:113801269;pvm:113801272;pvm:113801275;pvm:113801277	rn00061	0	1000	0		2.3.1.199	Lipid metabolism	N
R09426		C19574[c] + C00167[c] --> C19605[c] + C00015[c]	(pvm:113823738) or (pvm:113823745) or (pvm:113823747) or (pvm:113823748) or (pvm:113823750) or (pvm:113823750) or (pvm:113823785) or (pvm:113823789) or (pvm:113823789) or (pvm:113823792) or (pvm:113823795)	pvm:113823738;pvm:113823745;pvm:113823747;pvm:113823748;pvm:113823750;pvm:113823750;pvm:113823785;pvm:113823789;pvm:113823789;pvm:113823792;pvm:113823795	rn00980	0	1000	0		2.4.1.17	Xenobiotics biodegradation and metabolism	N
R09427		C19574[c] + C00167[c] --> C19606[c] + C00015[c]	(pvm:113823738) or (pvm:113823745) or (pvm:113823747) or (pvm:113823748) or (pvm:113823750) or (pvm:113823750) or (pvm:113823785) or (pvm:113823789) or (pvm:113823789) or (pvm:113823792) or (pvm:113823795)	pvm:113823738;pvm:113823745;pvm:113823747;pvm:113823748;pvm:113823750;pvm:113823750;pvm:113823785;pvm:113823789;pvm:113823789;pvm:113823792;pvm:113823795	rn00980	0	1000	0		2.4.1.17	Xenobiotics biodegradation and metabolism	N
R09428	UDPglucuronate beta-D-glucuronosyltransferase (acceptor-unspecific)	C00167[c] + C19645[c] --> C00015[c] + C19646[c]	(pvm:113823738) or (pvm:113823745) or (pvm:113823747) or (pvm:113823748) or (pvm:113823750) or (pvm:113823750) or (pvm:113823785) or (pvm:113823789) or (pvm:113823789) or (pvm:113823792) or (pvm:113823795)	pvm:113823738;pvm:113823745;pvm:113823747;pvm:113823748;pvm:113823750;pvm:113823750;pvm:113823785;pvm:113823789;pvm:113823789;pvm:113823792;pvm:113823795	rn01100	0	1000	0		2.4.1.17	Global and overview maps	N
R09442		C19488[c] + C00007[c] + C00005[c] + C00080[c] --> C19604[c] + C00001[c] + C00006[c]	(pvm:113829697) or (pvm:113801218) or (pvm:113802729) or (pvm:113802766) or (pvm:113803893) or (pvm:113803906) or (pvm:113803903) or (pvm:113803928) or (pvm:113805029) or (pvm:113805029) or (pvm:113805053)	pvm:113829697;pvm:113801218;pvm:113802729;pvm:113802766;pvm:113803893;pvm:113803906;pvm:113803903;pvm:113803928;pvm:113805029;pvm:113805029;pvm:113805053	rn00980	0	1000	0		1.14.14.1	Xenobiotics biodegradation and metabolism	N
R09443	microsomal epoxide hydrolase	C19604[c] + C00001[c] --> C19607[c]	(pvm:113829078)	pvm:113829078	rn00980	0	1000	0		3.3.2.9	Xenobiotics biodegradation and metabolism	N
R09449	very-long-chain acyl-CoA:NADP+ oxidoreductase	C00658[c] + C00005[c] + C00080[c] --> C02843[c] + C00006[c]	(pvm:113823674)	pvm:113823674	rn00062	0	1000	0		1.3.1.93	Lipid metabolism	N
R09450	long-chain fatty-acyl-CoA hydrolase	C02843[c] + C00001[c] --> C00638[c] + C00010[c]	(pvm:113803399) or (pvm:113804504)	pvm:113803399;pvm:113804504	rn00062	0	1000	0		3.1.2.2	Lipid metabolism	N
R09470	long-chain-primary-alcohol:NADP+ oxidoreductase (CoA-acylating)	C02843[c] + 2 C00005[c] + 2 C00080[c] --> C00226[c] + 2 C00006[c] + C00010[c]	(pvm:113817756)	pvm:113817756	rn00073	0	1000	0		1.2.1.84	Lipid metabolism	N
R09474		C02843[c] --> C01629[c]	(pvm:113801308)	pvm:113801308	rn00073	0	1000	0		2.3.1.20	Lipid metabolism	N
R09506	thioredoxin:(5Z,9alpha,11alpha,13E,15S)-9,11-epidioxy-15-hydroxy-prosta-5,13-dienoate oxidoreductase	C00342[c] + C00427[c] --> C00343[c] + C00639[c]	(pvm:113801179)	pvm:113801179	rn00590	0	1000	0		1.11.1.20	Lipid metabolism	N
R09521	L-tyrosine,iodide:NADP+ oxidoreductase (iodinating)	C00082[c] + C00006[c] + C00708[c] --> C02515[c] + C00005[c]	(pvm:113816684) or (pvm:113816693)	pvm:113816684;pvm:113816693	rn00480	0	1000	0		1.21.1.1	Metabolism of other amino acids	N
R09522	L-tyrosine,iodide:NADP+ oxidoreductase (iodinating)	C02515[c] + C00006[c] + C00708[c] --> C01060[c] + C00005[c]	(pvm:113816684) or (pvm:113816693)	pvm:113816684;pvm:113816693	rn00480	0	1000	0		1.21.1.1	Metabolism of other amino acids	N
R09532	2,3-bisphospho-D-glycerate 3-phosphohydrolase	C01159[c] + C00001[c] --> C00631[c] + C00009[c]	(pvm:113817593) or (pvm:113818669) or (pvm:113818688) or (pvm:113818693) or (pvm:113818693) or (pvm:113818699) or (pvm:113818701)	pvm:113817593;pvm:113818669;pvm:113818688;pvm:113818693;pvm:113818693;pvm:113818699;pvm:113818701	rn00010	0	1000	0		3.1.3.80	Carbohydrate metabolism	N
R09536	fatty acylamide amidohydrolase	C11695[c] + C00001[c] --> C00219[c] + C00189[c]	(pvm:113807690) or (pvm:113807690) or (pvm:113807691) or (pvm:113807691)	pvm:113807690;pvm:113807690;pvm:113807691;pvm:113807691	rn00590	0	1000	0		3.5.1.99	Lipid metabolism	N
R09537	fatty acylamide amidohydrolase	C19670[c] + C00001[c] --> C00712[c] + C00014[c]	(pvm:113807690) or (pvm:113807690) or (pvm:113807691) or (pvm:113807691)	pvm:113807690;pvm:113807690;pvm:113807691;pvm:113807691	rn00061	0	1000	0		3.5.1.99	Lipid metabolism	N
R09672	[protein]-3-O-(N-acetyl-D-glucosaminyl)-L-serine N-acetylglucosaminyl hydrolase	C19802[c] + C00001[c] --> C02189[c] + C00140[c]	(pvm:113820860) or (pvm:113820881)	pvm:113820860;pvm:113820881	rn01100	0	1000	0		3.2.1.169	Global and overview maps	N
R09673	[protein]-3-O-(N-acetyl-D-glucosaminyl)-L-threonine N-acetylglucosaminyl hydrolase	C19804[c] + C00001[c] --> C19803[c] + C00140[c]	(pvm:113820860) or (pvm:113820881)	pvm:113820860;pvm:113820881	rn01100	0	1000	0		3.2.1.169	Global and overview maps	N
R09676	UDP-N-acetyl-D-glucosamine:protein-O-beta-N-acetyl-D-glucosaminyl transferase	C00043[c] + C02189[c] --> C00015[c] + C19802[c]	(pvm:113802141) or (pvm:113802152)	pvm:113802141;pvm:113802152	rn00512	0	1000	0		2.4.1.255	Glycan biosynthesis and metabolism	N
R09677	UDP-N-acetyl-D-glucosamine:protein-O-beta-N-acetyl-D-glucosaminyl transferase	C00043[c] + C19803[c] --> C00015[c] + C19804[c]	(pvm:113802141) or (pvm:113802152)	pvm:113802141;pvm:113802152	rn00240	0	1000	0		2.4.1.255	Nucleotide metabolism	N
R09726	ATP:molybdopterin adenylyltransferase	C00002[c] + C05924[c] --> C00013[c] + C19848[c]	(pvm:113821931)	pvm:113821931	rn00790	0	1000	0		2.7.7.75	Metabolism of cofactors and vitamins	N
R09735	adenylyl-molybdopterin:molybdate molybdate transferase (AMP-forming)	C19848[c] + C06232[c] --> C18237[c] + C00020[c] + C00001[c]	(pvm:113822883)	pvm:113822883	rn00790	0	1000	0		2.10.1.1	Metabolism of cofactors and vitamins	N
R09737	S-adenosyl-L-methionine:2-methoxy-6-all-trans-polyprenyl-1,4-benzoquinol 5-C-methyltransferase	C00019[c] + C19858[c] --> C00021[c] + C19859[c]	(pvm:113805339)	pvm:113805339	rn00261	0	1000	0		2.1.1.201	Biosynthesis of other secondary metabolites	N
R09752	GDP:alpha-D-glucose 1-phosphate guanylyltransferase	C00394[c] + C00009[c] --> C00103[c] + C00035[c]	(pvm:113821931)	pvm:113821931	rn00010	0	1000	0		2.7.7.78	Carbohydrate metabolism	N
R09832	8-oxo-dGTP diphosphohydrolase	C19967[c] + C00001[c] --> C19968[c] + C00013[c]	(pvm:113823028)	pvm:113823028	rn01100	0	1000	0		3.6.1.55	Global and overview maps	N
R09833	2-hydroxy-dATP diphosphohydrolase	C19969[c] + C00001[c] --> C19970[c] + C00013[c]	(pvm:113823031)	pvm:113823031	rn01100	0	1000	0		3.6.1.56	Global and overview maps	N
R09844	farnesyl-diphosphate:protein-cysteine farnesyltransferase	C00448[c] + C20119[c] --> C20120[c] + C00013[c]	(pvm:113802091)	pvm:113802091	rn00900	0	1000	0		2.5.1.58	Metabolism of terpenoids and polyketides	N
R09875	leukotriene-C4 hydrolase	C02166[c] + C00001[c] --> C05951[c] + C00025[c]	(pvm:113811705) or (pvm:113812825)	pvm:113811705;pvm:113812825	rn00590	0	1000	0		3.4.19.14	Lipid metabolism	N
R09877	8-oxo-dGDP phosphohydrolase	C20176[c] + C00001[c] --> C19968[c] + C00009[c]	(pvm:113824154) or (pvm:113825349)	pvm:113824154;pvm:113825349	rn01100	0	1000	0		3.6.1.58	Global and overview maps	N
R09955	5-androstene-3,17-dione delta5-delta4-isomerase	C20252[c] --> C00280[c]	(pvm:113815560)	pvm:113815560	rn00984	0	1000	0		5.3.3.1	Xenobiotics biodegradation and metabolism	N
R09958	(S)-ethylmalonyl-CoA carboxy-lyase (butanoyl-CoA-forming)	C18026[c] --> C00136[c] + C00011[c]	(pvm:113820160)	pvm:113820160	rn00062	0	1000	0		4.1.1.94	Lipid metabolism	N
R09959	7,8-dihydroneopterin 3'-triphosphate acetaldehyde-lyase (6-carboxy-5,6,7,8-tetrahydropterin and triphosphate-forming)	C04895[c] + C00001[c] --> C20239[c] + C00084[c] + C00536[c]	(pvm:113803537)	pvm:113803537	rn00790	0	1000	0		4.1.2.50	Metabolism of cofactors and vitamins	N
R09979	(2S)-ethylmalonyl-CoA epimerase	C18026[c] --> C20238[c]	(pvm:113819971)	pvm:113819971	rn00630	0	1000	0		5.1.99.1	Carbohydrate metabolism	N
R09991	peptidyl-glutamate 4-carboxylase (menaquinone-epoxidizing)	C20265[c] + C06246[c] + C00001[c] --> C05819[c] + C06247[c] + C00011[c] + C00007[c]	(pvm:113820150)	pvm:113820150	rn00130	0	1000	0		4.1.1.90	Metabolism of cofactors and vitamins	N
R09992	menaquinone:oxidized-dithiothreitol oxidoreductase	C20265[c] + C00265[c] --> C00828[c] + C01119[c] + C00001[c]	(pvm:113821554)	pvm:113821554	rn00130	0	1000	0		1.17.4.4	Metabolism of cofactors and vitamins	N
R10059	L-tyrosine,iodide:NADP+ oxidoreductase (iodinating)	C00082[c] + 2 C00006[c] + 2 C00708[c] --> C01060[c] + 2 C00005[c]	(pvm:113816684) or (pvm:113816693)	pvm:113816684;pvm:113816693	rn00130	0	1000	0		1.21.1.1	Metabolism of cofactors and vitamins	N
R10074	glutaryl-CoA:electron-transfer flavoprotein 2,3-oxidoreductase	C00527[c] + C04253[c] --> C02411[c] + C04570[c]	(pvm:113827258)	pvm:113827258	rn00071	0	1000	0		1.3.8.6	Lipid metabolism	N
R10092	carbonate hydro-lyase (carbon-dioxide-forming)	C00288[c] + C00080[c] --> C00011[c] + C00001[c]	(pvm:113806982) or (pvm:113806994) or (pvm:113806994) or (pvm:113808119) or (pvm:113809236) or (pvm:113810338) or (pvm:113811565)	pvm:113806982;pvm:113806994;pvm:113806994;pvm:113808119;pvm:113809236;pvm:113810338;pvm:113811565	rn00910	0	1000	0		4.2.1.1	Energy metabolism	N
R10134	mycophenolic acid O-acyl-glucuronide-ester hydrolase	C20383[c] + C00001[c] --> C20380[c] + C00191[c]	(pvm:113807124)	pvm:113807124	rn00040	0	1000	0		3.1.1.93	Carbohydrate metabolism	N
R10138		G00164[c] + G10612[c] --> G00165[c] + G10619[c]	(pvm:113829491) or (pvm:113829491) or (pvm:113829491)	pvm:113829491;pvm:113829491;pvm:113829491	rn00534	0	1000	0		2.4.1.225	Glycan biosynthesis and metabolism	N
R10139		G00165[c] + G10610[c] --> G13062[c] + G10619[c]	(pvm:113829446) or (pvm:113829448) or (pvm:113829459) or (pvm:113829479)	pvm:113829446;pvm:113829448;pvm:113829459;pvm:113829479	rn00534	0	1000	0		2.4.1.224	Glycan biosynthesis and metabolism	N
R10183	UTP:N-acetyl-alpha-D-galactosamine-1-phosphate uridylyltransferase	C00075[c] + C18060[c] --> C00013[c] + C00203[c]	(pvm:113823086)	pvm:113823086	rn01100	0	1000	0		2.7.7.83	Global and overview maps	N
R10192	zeaxanthin:oxygen 15,15'-oxidoreductase (bond-cleaving, cis-isomerizing)	C06098[c] + C00007[c] --> C18195[c] + C18196[c]	(pvm:113812036) or (pvm:113812042) or (pvm:113817072) or (pvm:113817082) or (pvm:113818169)	pvm:113812036;pvm:113812042;pvm:113817072;pvm:113817082;pvm:113818169	rn00906	0	1000	0		1.13.11.65	Metabolism of terpenoids and polyketides	N
R10235	deoxyinosine diphosphate phosphatase	C01344[c] + C00001[c] <=> C06196[c] + C00009[c]	(pvm:113803305)	pvm:113803305	rn00230	-1000	1000	0		3.6.1.64	Nucleotide metabolism	Y
R10242	5alpha-androstane-3,17-dione:NADP+ delta4-oxidoreductase	C00674[c] + C00006[c] --> C00280[c] + C00005[c] + C00080[c]	(pvm:113818992) or (pvm:113818994) or (pvm:113819003)	pvm:113818992;pvm:113818994;pvm:113819003	rn00140	0	1000	0		1.3.1.22	Lipid metabolism	N
R10288	(6S)-6beta-hydroxy-1,4,5,6-tetrahydronicotinamide-adenine-dinucleotide-phosphate hydro-lyase (ATP-hydrolysing; NADPH-forming)	C00002[c] + C04899[c] --> C00008[c] + C00009[c] + C00005[c]	(pvm:113826815)	pvm:113826815	rn00230	0	1000	0		4.2.1.93	Nucleotide metabolism	N
R10436	UDP-alpha-D-galactose:alpha-D-GalNAc-(1->3)-alpha-D-GalNAc-diphospho-ditrans,octacis-undecaprenol beta-1,3-galactosyltransferase	C00052[c] + C20621[c] --> C00015[c] + C20622[c]	(pvm:113815341) or (pvm:113815342) or (pvm:113816616) or (pvm:113816625) or (pvm:113816633) or (pvm:113816640) or (pvm:113816662) or (pvm:113817809) or (pvm:113817819) or (pvm:113817827) or (pvm:113817837) or (pvm:113818941) or (pvm:113818950) or (pvm:113818954) or (pvm:113818957)	pvm:113815341;pvm:113815342;pvm:113816616;pvm:113816625;pvm:113816633;pvm:113816640;pvm:113816662;pvm:113817809;pvm:113817819;pvm:113817827;pvm:113817837;pvm:113818941;pvm:113818950;pvm:113818954;pvm:113818957	rn00052	0	1000	0		2.4.1.122	Carbohydrate metabolism	N
R10442		C00454[c] + C00001[c] --> C01117[c] + C00009[c]	(pvm:113820751)	pvm:113820751	rn01100	0	1000	0		3.6.1.5	Global and overview maps	N
R10443	nucleoside triphosphate phosphohydrolase (nucleoside monophosphoate-forming)	C00201[c] + 2 C00001[c] --> C01117[c] + 2 C00009[c]	(pvm:113820751)	pvm:113820751	rn01100	0	1000	0		3.6.1.5	Global and overview maps	N
R10455	S-adenosyl-L-methionine:L-histidine-[translation elongation factor 2] 2-[(3S)-3-amino-3-carboxypropyl]transferase	C00019[c] + C20663[c] --> C00170[c] + C04441[c]	(pvm:113823046)	pvm:113823046	rn00270	0	1000	0		2.5.1.108	Amino acid metabolism	N
R10484	palmitoyl-CoA:[protein]-L-cysteine S-palmitoyltransferase	C00154[c] + C02743[c] --> C17202[c] + C00010[c]	(pvm:113802827) or (pvm:113803973) or (pvm:113803988) or (pvm:113803990) or (pvm:113805060) or (pvm:113805071) or (pvm:113805075) or (pvm:113805082) or (pvm:113805099) or (pvm:113805106) or (pvm:113806188) or (pvm:113806196) or (pvm:113806196)	pvm:113802827;pvm:113803973;pvm:113803988;pvm:113803990;pvm:113805060;pvm:113805071;pvm:113805075;pvm:113805082;pvm:113805099;pvm:113805106;pvm:113806188;pvm:113806196;pvm:113806196	rn00061	0	1000	0		2.3.1.225	Lipid metabolism	N
R10548	ATP:1D-myo-inositol 1-diphosphate 2,3,4,5,6-pentakisphosphate 5-phosphotransferase	C00002[c] + C11174[c] --> C00008[c] + C20690[c]	(pvm:113819933) or (pvm:113819942)	pvm:113819933;pvm:113819942	rn04070	0	1000	0		2.7.4.21		N
R10559	all-trans-beta-carotene:O2 oxidoreductase (9',10'-cleaving)	C02094[c] + C00007[c] --> C20695[c] + C12287[c]	(pvm:113818172) or (pvm:113818181) or (pvm:113818188)	pvm:113818172;pvm:113818181;pvm:113818188	rn00830	0	1000	0		1.13.11.71	Metabolism of cofactors and vitamins	N
R10575	(R)-2-hydroxyglutarate:acceptor 2-oxidoreductase	C01087[c] + C00028[c] --> C00026[c] + C00030[c]	(pvm:113801174)	pvm:113801174	rn00020	0	1000	0		1.1.99.39	Carbohydrate metabolism	N
R10596	UDP-N-acetyl-alpha-D-glucosamine:alpha-D-mannosyl-threonyl-[protein] 4-beta-N-acetyl-D-glucosaminyltransferase	C00043[c] + C20722[c] --> C00015[c] + C20723[c]	(pvm:113822445)	pvm:113822445	rn00520	0	1000	0		2.4.1.312	Carbohydrate metabolism	N
R10619	D-galactose 1-epimerase;	C00124[c] --> C00984[c]	(pvm:113819971)	pvm:113819971	rn00052	0	1000	0		5.1.3.3	Carbohydrate metabolism	N
R10620	UDP-N-acetyl-alpha-D-galactosamine:N-acetyl-beta-D-glucosaminyl-(1->4)-alpha-D-mannosyl-threonyl-[protein] 3-beta-N-acetyl-D-galactosaminyltransferase	C20723[c] + C00203[c] --> C20734[c] + C00015[c]	(pvm:113822492)	pvm:113822492	rn00240	0	1000	0		2.4.1.313	Nucleotide metabolism	N
R10633		C00003[c] + C01997[c] + C00001[c] --> C00153[c] + C02415[c] + C20658[c] + C00080[c]	(pvm:113810944) or (pvm:113810958) or (pvm:113810962) or (pvm:113810970) or (pvm:113810978) or (pvm:113810984) or (pvm:113810986) or (pvm:113812117)	pvm:113810944;pvm:113810958;pvm:113810962;pvm:113810970;pvm:113810978;pvm:113810984;pvm:113810986;pvm:113812117	rn00760	0	1000	0		2.3.1.286	Metabolism of cofactors and vitamins	N
R10634		C00003[c] + C20743[c] + C00001[c] --> C00153[c] + C02188[c] + C20658[c] + C00080[c]	(pvm:113810944) or (pvm:113810958) or (pvm:113810962) or (pvm:113810970) or (pvm:113810978) or (pvm:113810984) or (pvm:113810986) or (pvm:113812117)	pvm:113810944;pvm:113810958;pvm:113810962;pvm:113810970;pvm:113810978;pvm:113810984;pvm:113810986;pvm:113812117	rn00760	0	1000	0		2.3.1.286	Metabolism of cofactors and vitamins	N
R10635	NADH:oxygen oxidoreductase (H2O2-forming, epimerising)	C20744[c] + C00080[c] + C00007[c] --> C00003[c] + C00027[c]	(pvm:113827177)	pvm:113827177	rn00630	0	1000	0		1.6.3.5	Carbohydrate metabolism	N
R10636	NADPH:oxygen oxidoreductase (H2O2-forming, epimerising)	C20745[c] + C00080[c] + C00007[c] --> C00006[c] + C00027[c]	(pvm:113827177)	pvm:113827177	rn00630	0	1000	0		1.6.3.5	Carbohydrate metabolism	N
R10648	L-threonylcarbamoyladenylate:adenine in tRNA N6-L-threonylcarbamoyltransferase	C20641[c] + C17324[c] --> C00020[c] + C20751[c]	(pvm:113806211) or (pvm:113806211)	pvm:113806211;pvm:113806211	rn00908	0	1000	0		2.3.1.234	Metabolism of terpenoids and polyketides	N
R10649	tRNA (N6-L-threonylcarbamoyladenosine37):sulfur-donor,S-adenosyl-L-methionine C2-methylthiotransferase	C20751[c] + C17023[c] + 2 C00019[c] --> C20752[c] + C00021[c] + C00073[c] + C05198[c]	(pvm:113826605)	pvm:113826605	rn01100	0	1000	0		2.8.4.5	Global and overview maps	N
R10650		C20751[c] + C17023[c] + C00019[c] --> C20754[c] + C00073[c] + C05198[c]	(pvm:113826605)	pvm:113826605	rn00261	0	1000	0		2.8.4.5	Biosynthesis of other secondary metabolites	N
R10651		C20754[c] + C00019[c] --> C20752[c] + C00021[c]	(pvm:113826605)	pvm:113826605	rn00261	0	1000	0		2.8.4.5	Biosynthesis of other secondary metabolites	N
R10687		C12270[c] + C00001[c] --> C01042[c] + C00025[c]	(pvm:113802800) or (pvm:113802802) or (pvm:113802807) or (pvm:113807364) or (pvm:113807374)	pvm:113802800;pvm:113802802;pvm:113802807;pvm:113807364;pvm:113807374	rn00250	0	1000	0		3.4.17.21	Amino acid metabolism	N
R10688		C20776[c] + C00001[c] --> C12270[c] + C00025[c]	(pvm:113802800) or (pvm:113802802) or (pvm:113802807) or (pvm:113807364) or (pvm:113807374)	pvm:113802800;pvm:113802802;pvm:113802807;pvm:113807364;pvm:113807374	rn00250	0	1000	0		3.4.17.21	Amino acid metabolism	N
R10722	2-amino-1-hydroxyethylphosphonate:oxygen 1-oxidoreductase (glycine-forming)	C05678[c] + C00007[c] --> C00037[c] + C00009[c]	(pvm:113818188)	pvm:113818188	rn00440	0	1000	0		1.13.11.78	Metabolism of other amino acids	N
R10764	alpha-L-fucopyranose 1-epimerase	C20835[c] <=> C20836[c]	(pvm:113819960) or (pvm:113819971)	pvm:113819960;pvm:113819971	rn01100	-1000	1000	0		5.1.3.29	Global and overview maps	Y
R10783	3-hexenol:NAD+ oxidoreductase	C16310[c] + C00004[c] + C00080[c] --> C08492[c] + C00003[c]	(pvm:113824313) or (pvm:113806470)	pvm:113824313;pvm:113806470	rn00592	0	1000	0		1.1.1.1	Lipid metabolism	N
R10804	UDP-alpha-D-galactose:1-alkyl-2-acylglycerol 3-beta-D-galactosyl-transferase	C03201[c] + C00052[c] --> C20859[c] + C00015[c]	(pvm:113828240)	pvm:113828240	rn00565	0	1000	0		2.4.1.47	Lipid metabolism	N
R10805	3'-phosphoadenylyl-sulfate:1-alkyl-2-acyl-3-beta-galactosyl-sn-glycerol 3'-sulfotransferase	C00053[c] + C20859[c] --> C00054[c] + C20825[c]	(pvm:113823251) or (pvm:113824400) or (pvm:113824408) or (pvm:113824411) or (pvm:113824411) or (pvm:113824415) or (pvm:113824423) or (pvm:113824427)	pvm:113823251;pvm:113824400;pvm:113824408;pvm:113824411;pvm:113824411;pvm:113824415;pvm:113824423;pvm:113824427	rn00565	0	1000	0		2.8.2.11	Lipid metabolism	N
R10812	S-adenosyl-L-methionine:5'-(N7-methyl 5'-triphosphoguanosine)-(2'-O-methyl-purine-ribonucleotide)-ribonucleotide-[mRNA] 2'-O-methyltransferase	C00019[c] + C04802[c] --> C00021[c] + C20862[c]	(pvm:113807680)	pvm:113807680	rn01100	0	1000	0		2.1.1.296	Global and overview maps	N
R10815	5'-(N7-methylguanosine 5'-triphospho)-[mRNA] N7-methylguanosine-5'-diphosphate phosphohydrolase	C02339[c] + C00001[c] --> C20183[c] + C20863[c]	(pvm:113828784) or (pvm:113803303)	pvm:113828784;pvm:113803303	rn01100	0	1000	0		3.6.1.62	Global and overview maps	N
R10825	very-long-chain acyl-CoA:malonyl-CoA C-acyltransferase (decarboxylating)	C20876[c] + C00083[c] --> C20877[c] + C00011[c] + C00010[c] + C06547[c]	(pvm:113800113) or (pvm:113801269) or (pvm:113801272) or (pvm:113801275) or (pvm:113801277)	pvm:113800113;pvm:113801269;pvm:113801272;pvm:113801275;pvm:113801277	rn00062	0	1000	0		2.3.1.199	Lipid metabolism	N
R10826	very-long-chain-(3R)-3-hydroxyacyl-CoA:NADP+ oxidoreductase	C20878[c] + C00006[c] --> C20877[c] + C00005[c] + C00080[c]	(pvm:113812189) or (pvm:113812201) or (pvm:113812212) or (pvm:113812217) or (pvm:113812226) or (pvm:113812227)	pvm:113812189;pvm:113812201;pvm:113812212;pvm:113812217;pvm:113812226;pvm:113812227	rn00062	0	1000	0		1.1.1.330	Lipid metabolism	N
R10827	very-long-chain (3R)-3-hydroxyacyl-CoA hydro-lyase	C20878[c] --> C20879[c] + C00001[c]	(pvm:113812644) or (pvm:113813772)	pvm:113812644;pvm:113813772	rn00062	0	1000	0		4.2.1.134	Lipid metabolism	N
R10828	very-long-chain acyl-CoA:NADP+ oxidoreductase	C20876[c] + C00006[c] --> C20879[c] + C00005[c] + C00080[c]	(pvm:113823674)	pvm:113823674	rn00062	0	1000	0		1.3.1.93	Lipid metabolism	N
R10830	beta-D-glucuronoside glucuronosohydrolase	G00526[c] + C00001[c] --> G00711[c] + C00191[c]	(pvm:113824311) or (pvm:113824330) or (pvm:113824340)	pvm:113824311;pvm:113824330;pvm:113824340	rn00531	0	1000	0		3.2.1.31	Glycan biosynthesis and metabolism	N
R10831		G00711[c] + C00001[c] <=> G10008[c] + C00140[c]	(pvm:113823303) or (pvm:113823305) or (pvm:113823305) or (pvm:113823306) or (pvm:113823306) or (pvm:113823307) or (pvm:113823307) or (pvm:113823330) or (pvm:113823358) or (pvm:113824451) or (pvm:113824467)	pvm:113823303;pvm:113823305;pvm:113823305;pvm:113823306;pvm:113823306;pvm:113823307;pvm:113823307;pvm:113823330;pvm:113823358;pvm:113824451;pvm:113824467	rn00531	-1000	1000	0		3.2.1.52	Glycan biosynthesis and metabolism	Y
R10868	3'-phospho-5'-adenylyl sulfate:[dermatan]-4-O-sulfo-N-acetyl-D-galactosamine 6-O-sulfotransferase	C00053[c] + C20908[c] --> C00054[c] + C20909[c]	(pvm:113825586)	pvm:113825586	rn01100	0	1000	0		2.8.2.33	Global and overview maps	N
R10869	3'-phospho-5'-adenylyl sulfate:[chondroitin]-4-O-sulfo-N-acetyl-D-galactosamine 6-O-sulfotransferase	C00053[c] + C00634[c] --> C00054[c] + C20907[c]	(pvm:113825586)	pvm:113825586	rn00531	0	1000	0		2.8.2.33	Glycan biosynthesis and metabolism	N
R10905		G10505[c] + C00001[c] --> G10505[c] + G00526[c]	(pvm:113824355)	pvm:113824355	rn00531	0	1000	0		3.2.1.35	Glycan biosynthesis and metabolism	N
R10925	(2E,6E)-farnesoate,[reduced NADPH---hemoprotein reductase]:oxygen oxidoreductase	C16502[c] + C03024[c] + C00007[c] --> C16504[c] + C03161[c] + C00001[c]	(pvm:113806121) or (pvm:113806126)	pvm:113806121;pvm:113806126	rn00981	0	1000	0		1.14.14.128	Metabolism of terpenoids and polyketides	N
R10928	1-phosphatidyl-1D-myo-inositol-3,5-bisphosphate 3-phosphohydrolase	C11556[c] + C00001[c] --> C11557[c] + C00009[c]	(pvm:113819869) or (pvm:113819869) or (pvm:113819869) or (pvm:113819876)	pvm:113819869;pvm:113819869;pvm:113819869;pvm:113819876	rn00562	0	1000	0		3.1.3.95	Carbohydrate metabolism	N
R10948	ATP:HCO3- phosphotransferase	C00002[c] + C00288[c] + C00080[c] --> C00008[c] + C20969[c]	(pvm:113827202)	pvm:113827202	rn00230	0	1000	0		6.3.5.5	Nucleotide metabolism	N
R10949		C00014[c] + C20969[c] --> C01563[c] + C00009[c]	(pvm:113827202)	pvm:113827202	rn00240	0	1000	0		6.3.5.5	Nucleotide metabolism	N
R10951	ATP:1-phosphatidyl-1D-myo-inositol 5-phosphotransferase	C00002[c] + C01194[c] --> C00008[c] + C11557[c]	(pvm:113818305)	pvm:113818305	rn04070	0	1000	0		2.7.1.150		N
R10952	1-phosphatidyl-1D-myo-inositol-4-phosphate inositolbisphosphohydrolase	C01277[c] + C00001[c] --> C01220[c] + C00641[c]	(pvm:113821042) or (pvm:113821045) or (pvm:113821046) or (pvm:113821051) or (pvm:113821065)	pvm:113821042;pvm:113821045;pvm:113821046;pvm:113821051;pvm:113821065	rn04070	0	1000	0		3.1.4.11		N
R10991	2-aminobutanoate:2-oxoglutarate aminotransferase	C02356[c] + C00026[c] <=> C00109[c] + C00025[c]	(pvm:113809964)	pvm:113809964	rn00270	-1000	1000	0		2.6.1.42	Amino acid metabolism	Y
R10992	L-alanine:2-oxobutanoate aminotransferase	C00041[c] + C00109[c] <=> C00022[c] + C02356[c]	(pvm:113809969) or (pvm:113809946)	pvm:113809969;pvm:113809946	rn00270	-1000	1000	0		2.6.1.44	Amino acid metabolism	Y
R10993	L-glutamate:2-aminobutanoate gamma-ligase (ADP-forming)	C00002[c] + C00025[c] + C02356[c] --> C00008[c] + C00009[c] + C21015[c]	(pvm:113817683)	pvm:113817683	rn00270	0	1000	0		6.3.2.2	Amino acid metabolism	N
R10994	gamma-L-glutamyl-L-2-aminobutyrate:glycine ligase (ADP-forming)	C00002[c] + C21015[c] + C00037[c] --> C00008[c] + C00009[c] + C21016[c]	(pvm:113824606) or (pvm:113825764)	pvm:113824606;pvm:113825764	rn00270	0	1000	0		6.3.2.3	Amino acid metabolism	N
R10996		C00109[c] + C00068[c] --> C21017[c] + C00011[c]	(pvm:113815389) or (pvm:113816682)	pvm:113815389;pvm:113816682	rn00640	0	1000	0		1.2.4.4	Carbohydrate metabolism	N
R10997		C21017[c] + C15972[c] --> C21018[c] + C00068[c]	(pvm:113815389) or (pvm:113816682)	pvm:113815389;pvm:113816682	rn00640	0	1000	0		1.2.4.4	Carbohydrate metabolism	N
R10998	propanoyl-CoA:enzyme N6-(dihydrolipoyl)lysine S-propanoyltransferase	C00100[c] + C15973[c] --> C00010[c] + C21018[c]	(pvm:113825174)	pvm:113825174	rn00640	0	1000	0		2.3.1.168	Carbohydrate metabolism	N
R11007	cholesterol,NADH:oxygen oxidoreductase (7,8 dehydrogenating)	C00187[c] + C00007[c] + C00004[c] + C00080[c] --> C01164[c] + C00003[c] + 2 C00001[c]	(pvm:113814294)	pvm:113814294	rn00981	0	1000	0		1.14.19.21	Metabolism of terpenoids and polyketides	N
R11008	cholesterol,NADPH:oxygen oxidoreductase (7,8 dehydrogenating)	C00187[c] + C00007[c] + C00005[c] + C00080[c] --> C01164[c] + C00006[c] + 2 C00001[c]	(pvm:113814294)	pvm:113814294	rn00981	0	1000	0		1.14.19.21	Metabolism of terpenoids and polyketides	N
R11063	S-methyl-L-methionine:L-homocysteine S-methyltransferase	C03172[c] + C00155[c] --> 2 C00073[c] + C00080[c]	(pvm:113803089)	pvm:113803089	rn00270	0	1000	0		2.1.1.10	Amino acid metabolism	N
R11100		C02218[c] <=> C20904[c]	(pvm:113817880)	pvm:113817880	rn00270	-1000	1000	0		4.3.1.17	Amino acid metabolism	Y
R11101		C17234[c] <=> C20905[c]	(pvm:113818996)	pvm:113818996	rn01100	-1000	1000	0		4.3.1.19	Global and overview maps	Y
R11165	S-adenosyl-L-methionine:2-[(3S)-3-carboxy-3-aminopropyl]-L-histidine-[translation elongation factor 2] methyltransferase (diphthine methyl ester-[translation elongation factor 2]-forming)	4 C00019[c] + C04441[c] + C00080[c] <=> 4 C00021[c] + C21151[c]	(pvm:113800219)	pvm:113800219	rn00270	-1000	1000	0		2.1.1.314	Amino acid metabolism	Y
R11166	diphthine methyl ester acylhydrolase	C21151[c] + C00001[c] --> C01573[c] + C00132[c] + C00080[c]	(pvm:113807133)	pvm:113807133	rn01100	0	1000	0		3.1.1.97	Global and overview maps	N
R11180	pseudouridine-5'-phosphate phosphohydrolase	C01168[c] + C00001[c] --> C02067[c] + C00009[c]	(pvm:113819893) or (pvm:113819894)	pvm:113819893;pvm:113819894	rn00240	0	1000	0		3.1.3.96	Nucleotide metabolism	N
R11201	(9Z)-hexadec-9-enoyl-CoA:[Wnt]-L-serine O-hexadecenoyltransferase	C21072[c] + C21172[c] --> C00010[c] + C21171[c]	(pvm:113807359)	pvm:113807359	rn01100	0	1000	0		2.3.1.250	Global and overview maps	N
R11202	[Wnt]-O-(9Z)-hexadec-9-enoyl-L-serine acylhydrolase	C21171[c] + C00001[c] --> C21172[c] + C08362[c]	(pvm:113807137)	pvm:113807137	rn00061	0	1000	0		3.1.1.98	Lipid metabolism	N
R11219	S-adenosyl-L-methionine:[protein]-L-arginine N-methyltransferase ([protein]-N(omega),N(omega)-dimethyl-L-arginine-forming)	2 C00019[c] + C00613[c] --> 2 C00021[c] + C21188[c]	(pvm:113800221) or (pvm:113800223) or (pvm:113800240) or (pvm:113800242) or (pvm:113800250) or (pvm:113800250) or (pvm:113800252)	pvm:113800221;pvm:113800223;pvm:113800240;pvm:113800242;pvm:113800250;pvm:113800250;pvm:113800252	rn01100	0	1000	0		2.1.1.319	Global and overview maps	N
R11220	S-adenosyl-L-methionine:[protein]-L-arginine N-methyltransferase ([protein]-N(omega),N(omega)'-dimethyl-L-arginine-forming)	2 C00019[c] + C00613[c] --> 2 C00021[c] + C21189[c]	(pvm:113800252) or (pvm:113800269) or (pvm:113800270)	pvm:113800252;pvm:113800269;pvm:113800270	rn01100	0	1000	0		2.1.1.320	Global and overview maps	N
R11231		C00450[c] + C00003[c] + 2 C00001[c] --> C00956[c] + C00004[c] + C00080[c]	(pvm:113816547)	pvm:113816547	rn00300	0	1000	0		1.2.1.31	Amino acid metabolism	N
R11232		C00450[c] + C00006[c] + 2 C00001[c] --> C00956[c] + C00005[c] + C00080[c]	(pvm:113816547)	pvm:113816547	rn00300	0	1000	0		1.2.1.31	Amino acid metabolism	N
R11258	[protein]-N-pros-phospho-L-histidine phosphohydrolase	C04261[c] + C00001[c] --> C00615[c] + C00009[c]	(pvm:113804919)	pvm:113804919	rn01100	0	1000	0		3.9.1.3	Global and overview maps	N
R11259	[protein]-N-tele-phospho-L-histidine phosphohydrolase	C04262[c] + C00001[c] --> C00615[c] + C00009[c]	(pvm:113804919)	pvm:113804919	rn01100	0	1000	0		3.9.1.3	Global and overview maps	N
R11307		C00760[c] + C00001[c] --> C00760[c] + C01898[c]	(pvm:113825476)	pvm:113825476	rn00500	0	1000	0		3.2.1.4	Carbohydrate metabolism	N
R11317		G05477[c] + C00001[c] --> G10920[c] + C00140[c]	(pvm:113823303) or (pvm:113823305) or (pvm:113823305) or (pvm:113823306) or (pvm:113823306) or (pvm:113823307) or (pvm:113823307) or (pvm:113823330) or (pvm:113823358) or (pvm:113824451) or (pvm:113824467)	pvm:113823303;pvm:113823305;pvm:113823305;pvm:113823306;pvm:113823306;pvm:113823307;pvm:113823307;pvm:113823330;pvm:113823358;pvm:113824451;pvm:113824467	rn00513	0	1000	0		3.2.1.52	Glycan biosynthesis and metabolism	N
R11318		G10615[c] + G10770[c] --> G10620[c] + G05477[c]	(pvm:113826070) or (pvm:113827196) or (pvm:113827199) or (pvm:113827210)	pvm:113826070;pvm:113827196;pvm:113827199;pvm:113827210	rn00513	0	1000	0		2.4.1.214	Glycan biosynthesis and metabolism	N
R11319	ADP:thiamin-diphosphate phosphotransferase	C00068[c] + C00008[c] --> C03028[c] + C00020[c]	(pvm:113819998) or (pvm:113821070) or (pvm:113821072)	pvm:113819998;pvm:113821070;pvm:113821072	rn00730	0	1000	0		2.7.4.3	Metabolism of cofactors and vitamins	N
R11323	dTTP diphosphohydrolase	C00459[c] + C00001[c] --> C00364[c] + C00013[c]	(pvm:113813587) or (pvm:113814754) or (pvm:113819647) or (pvm:113819647)	pvm:113813587;pvm:113814754;pvm:113819647;pvm:113819647	rn00240	0	1000	0		3.6.1.9	Nucleotide metabolism	N
R11329	Fe-coproporphyrin-III ferro-lyase (coproporphyrin-III-forming)	C21284[c] + 2 C00080[c] --> C05770[c] + C14818[c]	(pvm:113816325)	pvm:113816325	rn00860	0	1000	0		4.99.1.9	Metabolism of cofactors and vitamins	N
R11337	(R)-2-hydroxyglutarate:NAD+ 2-oxidireductase	C01087[c] + C00003[c] --> C00026[c] + C00004[c] + C00080[c]	(pvm:113815714)	pvm:113815714	rn01100	0	1000	0		1.1.1.399	Global and overview maps	N
R11345	DNA-N6-methyladenosine,2-oxoglutarate:oxygen oxidoreductase (formaldehyde-forming)	C03391[c] + C00026[c] + C00007[c] --> C00821[c] + C00067[c] + C00042[c] + C00011[c]	(pvm:113825095) or (pvm:113825142)	pvm:113825095;pvm:113825142	rn01100	0	1000	0		1.14.11.51	Global and overview maps	N
R11375		G10609[c] + G00050[c] <=> G10619[c] + G00428[c]	(pvm:113830596) or (pvm:113830619) or (pvm:113800507) or (pvm:113800518) or (pvm:113800518) or (pvm:113800521) or (pvm:113800528) or (pvm:113800540) or (pvm:113800548) or (pvm:113800549)	pvm:113830596;pvm:113830619;pvm:113800507;pvm:113800518;pvm:113800518;pvm:113800521;pvm:113800528;pvm:113800540;pvm:113800548;pvm:113800549	rn00601	-1000	1000	0		2.4.1.228	Glycan biosynthesis and metabolism	Y
R11376		G10609[c] + G00094[c] <=> G10619[c] + G11492[c]	(pvm:113830596) or (pvm:113830619) or (pvm:113800507) or (pvm:113800518) or (pvm:113800518) or (pvm:113800521) or (pvm:113800528) or (pvm:113800540) or (pvm:113800548) or (pvm:113800549)	pvm:113830596;pvm:113830619;pvm:113800507;pvm:113800518;pvm:113800518;pvm:113800521;pvm:113800528;pvm:113800540;pvm:113800548;pvm:113800549	rn00603	-1000	1000	0		2.4.1.228	Glycan biosynthesis and metabolism	Y
R11377		G10609[c] + G13080[c] <=> G10619[c] + G13081[c]	(pvm:113830596) or (pvm:113830619) or (pvm:113800507) or (pvm:113800518) or (pvm:113800518) or (pvm:113800521) or (pvm:113800528) or (pvm:113800540) or (pvm:113800548) or (pvm:113800549)	pvm:113830596;pvm:113830619;pvm:113800507;pvm:113800518;pvm:113800518;pvm:113800521;pvm:113800528;pvm:113800540;pvm:113800548;pvm:113800549	rn00603	-1000	1000	0		2.4.1.228	Glycan biosynthesis and metabolism	Y
R11399	dolichyl-beta-D-mannosyl-phosphate:protein-threonine O-D-mannosyltransferase	C03862[c] + C19803[c] --> C00110[c] + C20722[c]	(pvm:113814026) or (pvm:113814059) or (pvm:113814070) or (pvm:113814079) or (pvm:113814081)	pvm:113814026;pvm:113814059;pvm:113814070;pvm:113814079;pvm:113814081	rn01100	0	1000	0		2.4.1.109	Global and overview maps	N
R11400	ATP:3-O-[N-acetyl-beta-D-galactosaminyl-(1->3)-N-acetyl-beta-D-glucosaminyl-(1->4)-alpha-D-mannosyl]-L-threonyl-[protein] 6-phosphotransferase	C00002[c] + C20734[c] --> C00008[c] + C21366[c]	(pvm:113802523)	pvm:113802523	rn01100	0	1000	0		2.7.1.183	Global and overview maps	N
R11407		G10610[c] + G13027[c] --> G10619[c] + G13087[c]	(pvm:113822445)	pvm:113822445	rn00515	0	1000	0		2.4.1.312	Glycan biosynthesis and metabolism	N
R11425	[F-actin]-L-methionine,NADPH:O2 S-oxidoreductase	C21377[c] + C00005[c] + C00007[c] + C00080[c] --> C21378[c] + C00006[c] + C00001[c]	(pvm:113828577) or (pvm:113828584)	pvm:113828577;pvm:113828584	rn01100	0	1000	0		1.14.13.225	Global and overview maps	N
R11439	phosphoenolpyruvate:D-mannose-6-phosphate 1-(2-carboxy-2-oxoethyl)transferase	C00074[c] + C00275[c] + C00001[c] --> C21383[c] + C00009[c]	(pvm:113824156)	pvm:113824156	rn00051	0	1000	0		2.5.1.132	Carbohydrate metabolism	N
R11441	CTP:2-keto-3-deoxy-D-glycero-D-galacto-nononate cytidylyltransferase	C00063[c] + C20934[c] --> C00013[c] + C21384[c]	(pvm:113823146)	pvm:113823146	rn01100	0	1000	0		2.7.7.92	Global and overview maps	N
R11504	1,2-dihydro-beta-NAD:oxygen oxidoreductase (H2O2-forming)	C21423[c] + C00080[c] + C00007[c] --> C00003[c] + C00027[c]	(pvm:113827177)	pvm:113827177	rn00730	0	1000	0		1.6.3.5	Metabolism of cofactors and vitamins	N
R11505	1,6-dihydro-beta-NAD:oxygen oxidoreductase (H2O2-forming)	C21424[c] + C00080[c] + C00007[c] --> C00003[c] + C00027[c]	(pvm:113827177)	pvm:113827177	rn00730	0	1000	0		1.6.3.5	Metabolism of cofactors and vitamins	N
R11528	L-cysteine:sulfur-acceptor sulfurtransferase	C00097[c] + C02743[c] --> C00041[c] + C21440[c]	(pvm:113823240)	pvm:113823240	rn00250	0	1000	0		2.8.1.7	Amino acid metabolism	N
R11529	[enzyme]-S-sulfanylcysteine:sulfur-acceptor sulfurtransferase	C15812[c] + C02743[c] --> C15811[c] + C21440[c]	(pvm:113823240)	pvm:113823240	rn00730	0	1000	0		2.8.1.7	Metabolism of cofactors and vitamins	N
R11553	ATP:D-ribose-5-phosphate adenylyltransferase	C00002[c] + C00117[c] --> C00013[c] + C00301[c]	(pvm:113823150)	pvm:113823150	rn00061	0	1000	0		2.7.7.96	Lipid metabolism	N
R11559	protein N-terminal asparagine amidohydrolase	C21465[c] + C00001[c] --> C21458[c] + C00014[c]	(pvm:113818250) or (pvm:113818252)	pvm:113818250;pvm:113818252	rn01100	0	1000	0		3.5.1.121	Global and overview maps	N
R11560	protein N-terminal glutamine amidohydrolase	C02986[c] + C00001[c] --> C21456[c] + C00014[c]	(pvm:113821725)	pvm:113821725	rn01100	0	1000	0		3.5.1.122	Global and overview maps	N
R11562	protein-Nomega-(1-hydroxy-2-oxopropyl)-L-arginine hydrolase	C21466[c] + C00001[c] --> C00613[c] + C01432[c]	(pvm:113821725)	pvm:113821725	rn01100	0	1000	0		3.5.1.124	Global and overview maps	N
R11563	protein-N6-(1-hydroxy-2-oxopropyl)-L-lysine hydrolase	C21467[c] + C00001[c] --> C02188[c] + C01432[c]	(pvm:113821725)	pvm:113821725	rn00310	0	1000	0		3.5.1.124	Amino acid metabolism	N
R11564	protein-S-(1-hydroxy-2-oxopropyl)-L-cysteine hydrolase	C21468[c] + C00001[c] --> C02743[c] + C01432[c]	(pvm:113821725)	pvm:113821725	rn01100	0	1000	0		3.5.1.124	Global and overview maps	N
R11583	L-cysteine:molybdenum cofactor sulfurtransferase	C18237[c] + C00097[c] + C00030[c] + C00080[c] --> C21486[c] + C00041[c] + C00001[c] + C00028[c]	(pvm:113823282) or (pvm:113823282)	pvm:113823282;pvm:113823282	rn00790	0	1000	0		2.8.1.9	Metabolism of cofactors and vitamins	N
R11714	UDP-alpha-D-galactose:N-acetyl-beta-D-glucosaminyl-R 3-beta-D-galactosyltransferase	C00052[c] + C03518[c] --> C00015[c] + C04656[c]	(pvm:113807833) or (pvm:113807841) or (pvm:113807841) or (pvm:113807843) or (pvm:113807852) or (pvm:113808891) or (pvm:113808915) or (pvm:113808955) or (pvm:113808966)	pvm:113807833;pvm:113807841;pvm:113807841;pvm:113807843;pvm:113807852;pvm:113808891;pvm:113808915;pvm:113808955;pvm:113808966	rn01100	0	1000	0		2.4.1.86	Global and overview maps	N
R11762		C04244[c] <=> C21640[c]	(pvm:113811172)	pvm:113811172	rn00790	-1000	1000	0		1.1.1.153	Metabolism of cofactors and vitamins	Y
R11765	tetrahydrobiopterin:NADP+ oxidoreductase (7,8-dihydrobiopterin-forming)	C00272[c] + C00006[c] --> C02953[c] + C00005[c] + C00080[c]	(pvm:113821217)	pvm:113821217	rn00790	0	1000	0		1.5.1.3	Metabolism of cofactors and vitamins	N
R11861	glutathione gamma-glutamyl cyclotransferase (5-oxoproline-forming)	C00051[c] --> C01419[c] + C01879[c]	(pvm:113821378) or (pvm:113824884) or (pvm:113827112)	pvm:113821378;pvm:113824884;pvm:113827112	rn00480	0	1000	0		4.3.2.7	Metabolism of other amino acids	N
R11878	[sulfatase]-L-cysteine:oxygen oxidoreductase (3-oxo-L-alanine-forming)	C21740[c] + C00007[c] + 2 C00145[c] --> C21741[c] + C00283[c] + C15496[c] + C00001[c]	(pvm:113800390)	pvm:113800390	rn01100	0	1000	0		1.8.3.7	Global and overview maps	N
R11891	ATP:5-fluorouridine-monophosphate phosphotransferase	C00002[c] + C16634[c] --> C00008[c] + C21748[c]	(pvm:113819930) or (pvm:113819931)	pvm:113819930;pvm:113819931	rn00983	0	1000	0		2.7.4.14	Xenobiotics biodegradation and metabolism	N
R11892	ATP:5-fluorodeoxyuridine-monophosphate phosphotransferase	C00002[c] + C04242[c] --> C00008[c] + C21750[c]	(pvm:113819930) or (pvm:113819931)	pvm:113819930;pvm:113819931	rn00983	0	1000	0		2.7.4.14	Xenobiotics biodegradation and metabolism	N
R11893	5-fluorodeoxyuridine-diphosphate:thioredoxin-disulfide 2'-oxidoreductase	C21750[c] + C00343[c] + C00001[c] --> C21748[c] + C00342[c]	(pvm:113821498)	pvm:113821498	rn00983	0	1000	0		1.17.4.1	Xenobiotics biodegradation and metabolism	N
R11894	ATP:5-fluorouridine-diphosphate phosphotransferase	C00002[c] + C21748[c] --> C00008[c] + C21749[c]	(pvm:113821087) or (pvm:113821105) or (pvm:113821107)	pvm:113821087;pvm:113821105;pvm:113821107	rn00983	0	1000	0		2.7.4.6	Xenobiotics biodegradation and metabolism	N
R11895	ATP:5-fluorodeoxyuridine-diphosphate phosphotransferase	C00002[c] + C21750[c] --> C00008[c] + C21751[c]	(pvm:113821087) or (pvm:113821105) or (pvm:113821107)	pvm:113821087;pvm:113821105;pvm:113821107	rn00983	0	1000	0		2.7.4.6	Xenobiotics biodegradation and metabolism	N
R11896	5-fluorodeoxyuridine-triphosphate diphosphohydrolase	C21751[c] + C00001[c] --> C04242[c] + C00013[c]	(pvm:113815940)	pvm:113815940	rn00983	0	1000	0		3.6.1.23	Xenobiotics biodegradation and metabolism	N
R11905		C21758[c] + C00051[c] --> C02320[c]	(pvm:113825341) or (pvm:113825373) or (pvm:113825371) or (pvm:113826467) or (pvm:113826491) or (pvm:113826502) or (pvm:113827639) or (pvm:113827639) or (pvm:113827638) or (pvm:113827647) or (pvm:113827664) or (pvm:113827708) or (pvm:113827712) or (pvm:113827714) or (pvm:113828804) or (pvm:113828804) or (pvm:113828822) or (pvm:113829890) or (pvm:113829896) or (pvm:113829903) or (pvm:113829904) or …	pvm:113825341;pvm:113825373;pvm:113825371;pvm:113826467;pvm:113826491;pvm:113826502;pvm:113827639;pvm:113827639;pvm:113827638;pvm:113827647;pvm:113827664;pvm:113827708;pvm:113827712;pvm:113827714;pvm:113828804;pvm:113828804;pvm:113828822;pvm:113829890;pvm:113829896;pvm:113829903;pvm:113829904;pvm:113829943;pvm:113829946	rn00983	0	1000	0		2.5.1.18	Xenobiotics biodegradation and metabolism	N
R11929	sulfide:glutathione,quinone oxidoreductase	C00283[c] + C00051[c] + C15602[c] --> C17267[c] + C15603[c]	(pvm:113803075) or (pvm:113803079)	pvm:113803075;pvm:113803079	rn00920	0	1000	0		1.8.5.8	Energy metabolism	N
R11932	4-hydroxy-L-tryptophan carboxy-lyase	C21777[c] --> C21762[c] + C00011[c]	(pvm:113804944)	pvm:113804944	rn00901	0	1000	0		4.1.1.105	Biosynthesis of other secondary metabolites	N
R11945	NADH:ubiquinone oxidoreductase	C00399[c] + C00004[c] + 6 C00080[c] --> C00390[c] + C00003[c] + 5 C00080[c]	(pvm:113819580) or (pvm:113800564) or (pvm:113800564) or (pvm:113812471) or (pvm:113818481) or (pvm:113820796) or (pvm:113823144) or (pvm:113823145) or (pvm:113802340) or (pvm:113803468) or (pvm:113809135) or (pvm:113814903) or (pvm:113816164) or (pvm:113807007) or (pvm:113807008) or (pvm:113807009) or (pvm:113817587)	pvm:113819580;pvm:113800564;pvm:113800564;pvm:113812471;pvm:113818481;pvm:113820796;pvm:113823144;pvm:113823145;pvm:113802340;pvm:113803468;pvm:113809135;pvm:113814903;pvm:113816164;pvm:113807007;pvm:113807008;pvm:113807009;pvm:113817587	rn00130	0	1000	0		7.1.1.2	Metabolism of cofactors and vitamins	N
R11946		C17267[c] + C00007[c] --> C21787[c]	(pvm:113807453) or (pvm:113808559)	pvm:113807453;pvm:113808559	rn00630	0	1000	0		1.13.11.18	Carbohydrate metabolism	N
R11947		C21787[c] + C00001[c] --> C00051[c] + C00094[c]	(pvm:113807453) or (pvm:113808559)	pvm:113807453;pvm:113808559	rn00270	0	1000	0		1.13.11.18	Amino acid metabolism	N
R11952	all-trans-retinol,reduced adrenodoxin:oxygen 3,4-oxidoreductase	C00473[c] + 2 C00662[c] + 2 C00080[c] + C00007[c] --> C21797[c] + 2 C00667[c] + 2 C00001[c]	(pvm:113814294)	pvm:113814294	rn00830	0	1000	0		1.14.19.53	Metabolism of cofactors and vitamins	N
R11953	S-adenosyl-L-methionine:adenine in U6 snRNA methyltransferase	C00019[c] + C21798[c] --> C00021[c] + C21799[c]	(pvm:113801898) or (pvm:113804078)	pvm:113801898;pvm:113804078	rn00261	0	1000	0		2.1.1.346	Biosynthesis of other secondary metabolites	N
R12011	S-adenosyl-L-methionine:adenine in mRNA methyltransferase	C00019[c] + C21844[c] --> C00021[c] + C21845[c]	(pvm:113804091)	pvm:113804091	rn00261	0	1000	0		2.1.1.348	Biosynthesis of other secondary metabolites	N
R12024	N-(4-oxoglutaryl)-L-cysteinylglycine amidohydrolase	C21858[c] + C00001[c] --> C00026[c] + C01419[c]	(pvm:113821725)	pvm:113821725	rn00480	0	1000	0		3.5.1.128	Metabolism of other amino acids	N
R12067	6-methoxy-3-methyl-2-(all-trans-polyprenyl)-1,4-benzoquinol,acceptor:oxygen oxidoreductase (5-hydroxylating)	C19859[c] + C00030[c] + C00007[c] --> C21860[c] + C00028[c] + C00001[c]	(pvm:113815555) or (pvm:113815556)	pvm:113815555;pvm:113815556	rn01100	0	1000	0		1.14.99.60	Global and overview maps	N
R12068	albendazole,[reduced NADPH---hemoprotein reductase]:oxygen oxidoreductase (sulfoxide-forming)	C01779[c] + C03024[c] + C00007[c] --> C02809[c] + C03161[c] + C00001[c]	(pvm:113806138) or (pvm:113806139) or (pvm:113807294) or (pvm:113807298) or (pvm:113807309) or (pvm:113807310) or (pvm:113807315) or (pvm:113807315) or (pvm:113807323) or (pvm:113807347) or (pvm:113808424)	pvm:113806138;pvm:113806139;pvm:113807294;pvm:113807298;pvm:113807309;pvm:113807310;pvm:113807315;pvm:113807315;pvm:113807323;pvm:113807347;pvm:113808424	rn01100	0	1000	0		1.14.14.73	Global and overview maps	N
R12069	fenbendazole,[reduced NADPH---hemoprotein reductase]:oxygen oxidoreductase (sulfoxide-forming)	C21876[c] + C03024[c] + C00007[c] --> C21882[c] + C03161[c] + C00001[c]	(pvm:113806138) or (pvm:113806139) or (pvm:113807294) or (pvm:113807298) or (pvm:113807309) or (pvm:113807310) or (pvm:113807315) or (pvm:113807315) or (pvm:113807323) or (pvm:113807347) or (pvm:113808424)	pvm:113806138;pvm:113806139;pvm:113807294;pvm:113807298;pvm:113807309;pvm:113807310;pvm:113807315;pvm:113807315;pvm:113807323;pvm:113807347;pvm:113808424	rn01100	0	1000	0		1.14.14.73	Global and overview maps	N
R12070	albendazole,[reduced NADPH---hemoprotein reductase]:oxygen oxidoreductase (hydroxylating)	C01779[c] + C03024[c] + C00007[c] --> C21883[c] + C03161[c] + C00001[c]	(pvm:113808436) or (pvm:113808454) or (pvm:113808465) or (pvm:113808466) or (pvm:113809513) or (pvm:113810730) or (pvm:113810735) or (pvm:113810735) or (pvm:113810744) or (pvm:113810768) or (pvm:113810777)	pvm:113808436;pvm:113808454;pvm:113808465;pvm:113808466;pvm:113809513;pvm:113810730;pvm:113810735;pvm:113810735;pvm:113810744;pvm:113810768;pvm:113810777	rn01100	0	1000	0		1.14.14.74	Global and overview maps	N
R12071	fenbendazole,[reduced NADPH---hemoprotein reductase]:oxygen oxidoreductase (4'-hydroxylating)	C21876[c] + C03024[c] + C00007[c] --> C21884[c] + C03161[c] + C00001[c]	(pvm:113810798) or (pvm:113811859) or (pvm:113811883) or (pvm:113811884) or (pvm:113811885) or (pvm:113811911) or (pvm:113811919) or (pvm:113812988) or (pvm:113813001) or (pvm:113813040) or (pvm:113813040)	pvm:113810798;pvm:113811859;pvm:113811883;pvm:113811884;pvm:113811885;pvm:113811911;pvm:113811919;pvm:113812988;pvm:113813001;pvm:113813040;pvm:113813040	rn01100	0	1000	0		1.14.14.75	Global and overview maps	N
R12173	palmitoyl-CoA,ferrocytochrome-b5:oxygen oxidoreductase (9,10-dehydrogenating)	C00154[c] + 2 C00999[c] + C00007[c] + 2 C00080[c] --> C21072[c] + 2 C00996[c] + 2 C00001[c]	(pvm:113813193)	pvm:113813193	rn01040	0	1000	0		1.14.19.1	Lipid metabolism	N
R12184	ATP:Cob(II)yrinate diamide Cobeta-adenosyltransferase	2 C00002[c] + 2 C06504[c] + C03024[c] --> 2 C00536[c] + 2 C06506[c] + C03161[c]	(pvm:113825319)	pvm:113825319	rn00860	0	1000	0		2.5.1.17	Metabolism of cofactors and vitamins	N
R12188	L-cysteine-S-conjugate thiol-lyase (deaminating; 2-aminoprop-2-enoate-forming)	C02882[c] + C00001[c] --> C00145[c] + C00014[c] + C00022[c]	(pvm:113829381)	pvm:113829381	rn00010	0	1000	0		4.4.1.13	Carbohydrate metabolism	N
R12244	UDP-alpha-D-xylose:3-O-[Rib-ol-P-Rib-ol-P-3-beta-D-GalNAc-(1->3)-beta-D-GlcNAc-(1->4)-O-6-P-alpha-D-Man]-Ser/Thr-[protein] xylosyltransferase	G10613[c] + G13094[c] --> G10619[c] + G13095[c]	(pvm:113817289)	pvm:113817289	rn00515	0	1000	0		2.4.2.61	Glycan biosynthesis and metabolism	N
R12292		G13087[c] + G10611[c] --> G13091[c] + G10619[c]	(pvm:113822492)	pvm:113822492	rn00515	0	1000	0		2.4.1.313	Glycan biosynthesis and metabolism	N
R12293		G13091[c] + C00002[c] --> G13092[c] + G11113[c]	(pvm:113802523)	pvm:113802523	rn00515	0	1000	0		2.7.1.183	Glycan biosynthesis and metabolism	N
R12299	ditrans,polycis-dolichol:NADP+ 2,3-oxidoreductase	C00381[c] + C00006[c] --> C06081[c] + C00005[c] + C00080[c]	(pvm:113823675)	pvm:113823675	rn00510	0	1000	0		1.3.1.94	Glycan biosynthesis and metabolism	N
R12315	[protein]-L-lysine,2-oxoglutarate:oxygen oxidoreductase (3S-hydroxylating)	C02188[c] + C00026[c] + C00007[c] --> C22076[c] + C00042[c] + C00011[c]	(pvm:113825142)	pvm:113825142	rn00310	0	1000	0		1.14.11.63	Amino acid metabolism	N
R12356	propanoyl-CoA:oxygen 2-oxidoreductase	C00100[c] + C00007[c] <=> C00894[c] + C00027[c]	(pvm:113823684) or (pvm:113823690) or (pvm:113823704) or (pvm:113823712)	pvm:113823684;pvm:113823690;pvm:113823704;pvm:113823712	rn00410	-1000	1000	0		1.3.3.6	Metabolism of other amino acids	Y
R12399	cycloeucalenol:NADP+ 3-oxidoreductase	C22121[c] + C00005[c] + C00080[c] --> C02141[c] + C00006[c]	(pvm:113805268) or (pvm:113805292)	pvm:113805268;pvm:113805292	rn00100	0	1000	0		1.1.1.270	Lipid metabolism	N
R12400	episterol:NADP+ 3-oxidoreductase	C22122[c] + C00005[c] + C00080[c] --> C15777[c] + C00006[c]	(pvm:113805268) or (pvm:113805292)	pvm:113805268;pvm:113805292	rn00100	0	1000	0		1.1.1.270	Lipid metabolism	N
R12401	delta7-avenasterol:NADP+ 3-oxidoreductase	C22123[c] + C00005[c] + C00080[c] --> C15782[c] + C00006[c]	(pvm:113805268) or (pvm:113805292)	pvm:113805268;pvm:113805292	rn00100	0	1000	0		1.1.1.270	Lipid metabolism	N
R12402	3beta-hydroxysteroid:NADP+ 3-oxidoreductase	C02945[c] + C00006[c] --> C01876[c] + C00005[c] + C00080[c]	(pvm:113805268) or (pvm:113805292)	pvm:113805268;pvm:113805292	rn01100	0	1000	0		1.1.1.270	Global and overview maps	N
R12405	zymosterol:NADP+ 3-oxidoreductase	C22136[c] + C00005[c] + C00080[c] --> C05437[c] + C00006[c]	(pvm:113805268) or (pvm:113805292)	pvm:113805268;pvm:113805292	rn00100	0	1000	0		1.1.1.270	Lipid metabolism	N
R12423	[lipoyl-carrier protein E2]-N6-(octanoyl)-L-lysine:[Fe-S] cluster scaffold protein carrying a [4Fe-4S]2+ cluster sulfurtransferase	C22160[c] + C22154[c] + 2 C00019[c] + 2 C22150[c] + 8 C00080[c] --> C15973[c] + C22155[c] + 2 C00283[c] + 4 C14818[c] + 2 C00073[c] + 2 C05198[c] + 2 C22151[c]	(pvm:113823248)	pvm:113823248	rn00785	0	1000	0		2.8.1.8	Metabolism of cofactors and vitamins	N
R12424	[glycine cleavage system H]-N6-octanoyl-L-lysine:[Fe-S] cluster scaffold protein carrying a [4Fe-4S]2+ cluster sulfurtransferase	C22159[c] + C22154[c] + 2 C00019[c] + 2 C22150[c] + 8 C00080[c] --> C02972[c] + C22155[c] + 2 C00283[c] + 4 C14818[c] + 2 C00073[c] + 2 C05198[c] + 2 C22151[c]	(pvm:113823248)	pvm:113823248	rn00785	0	1000	0		2.8.1.8	Metabolism of cofactors and vitamins	N
R12427	octanoyl-[acp]:lipoyl-carrier-protein-E2 N-octanoyltransferase	C05752[c] + C22158[c] --> C22160[c] + C00229[c]	(pvm:113825205)	pvm:113825205	rn00785	0	1000	0		2.3.1.181	Metabolism of cofactors and vitamins	N
R12428	octanoyl-[acp]:Glycine-cleavage-system-H N-octanoyltransferase	C05752[c] + C22157[c] --> C22159[c] + C00229[c]	(pvm:113825205)	pvm:113825205	rn00785	0	1000	0		2.3.1.181	Metabolism of cofactors and vitamins	N
R12461	protein N6,N6,N6-trimethyl-L-lysine,2-oxoglutarate:oxygen oxidoreductase	C05546[c] + 3 C00026[c] + 3 C00007[c] --> C02188[c] + 3 C00042[c] + 3 C00067[c] + 3 C00011[c]	(pvm:113826273)	pvm:113826273	rn00310	0	1000	0		1.14.11.67	Amino acid metabolism	N
R12462	protein-N6,N6-dimethyl-L-lysine:acceptor oxidoreductase (demethylating)	C05545[c] + 2 C00028[c] + 2 C00001[c] --> C02188[c] + 2 C00067[c] + 2 C00030[c]	(pvm:113815557)	pvm:113815557	rn00310	0	1000	0		1.14.99.66	Amino acid metabolism	N
R12463	protein-N6,N6-dimethyl-L-lysine:acceptor oxidoreductase (demethylating)	C05545[c] + C00028[c] + C00001[c] --> C05544[c] + C00067[c] + C00030[c]	(pvm:113815557)	pvm:113815557	rn00310	0	1000	0		1.14.99.66	Amino acid metabolism	N
R12464	protein N6-methyl-L-lysine:acceptor oxidoreductase (demethylating)	C05544[c] + C00028[c] + C00001[c] --> C02188[c] + C00067[c] + C00030[c]	(pvm:113815557)	pvm:113815557	rn00310	0	1000	0		1.14.99.66	Amino acid metabolism	N
R12479		G10694[c] + 3 C00001[c] --> G00012[c] + 3 C00159[c]	(pvm:113829221)	pvm:113829221	rn00510	0	1000	0		3.2.1.113	Glycan biosynthesis and metabolism	N
R12496	long-chain acyl-CoA:sterol O-acyltransferase	C02843[c] + C00370[c] --> C00010[c] + C22215[c]	(pvm:113809781)	pvm:113809781	rn00061	0	1000	0		2.3.1.26	Lipid metabolism	N
R12516	3-methylbutyl acetate acetohydrolase	C12296[c] + C00001[c] --> C07328[c] + C00033[c]	(pvm:113827769)	pvm:113827769	rn00010	0	1000	0		3.1.1.112	Carbohydrate metabolism	N
R12540	L-phenylalanine,tetrahydropteridine:oxygen oxidoreductase (4-hydroxylating)	C00079[c] + C05650[c] + C00007[c] --> C00082[c] + C22239[c]	(pvm:113813041)	pvm:113813041	rn00130	0	1000	0		1.14.16.1	Metabolism of cofactors and vitamins	N
R12541	L-tyrosine,tetrahydropteridine:oxygen oxidoreductase (3-hydroxylating)	C00082[c] + C05650[c] + C00007[c] --> C00355[c] + C22239[c]	(pvm:113813041)	pvm:113813041	rn00130	0	1000	0		1.14.16.2	Metabolism of cofactors and vitamins	N
R12542	L-tryptophan,tetrahydropteridine:oxygen oxidoreductase (5-hydroxylating)	C00078[c] + C05650[c] + C00007[c] --> C00643[c] + C22239[c]	(pvm:113813054)	pvm:113813054	rn00260	0	1000	0		1.14.16.4	Amino acid metabolism	N
R12570	thioredoxin:hydroperoxide oxidoreductase	C00342[c] + C15498[c] --> C00343[c] + C00001[c] + C01335[c]	(pvm:113801193) or (pvm:113801211) or (pvm:113801213)	pvm:113801193;pvm:113801211;pvm:113801213	rn01100	0	1000	0		1.11.1.24	Global and overview maps	N
R12578	glutathione:hydroperoxide oxidoreductase	2 C00051[c] + C15498[c] --> C00127[c] + C00001[c] + C01335[c]	(pvm:113800180) or (pvm:113800196)	pvm:113800180;pvm:113800196	rn00480	0	1000	0		1.11.1.27	Metabolism of other amino acids	N
R12587	NADPH 2'-phosphohydrolase	C00005[c] + C00001[c] --> C00004[c] + C00009[c]	(pvm:113806940)	pvm:113806940	rn00480	0	1000	0		3.1.3.108	Metabolism of other amino acids	N
R12595	8-oxo-GDP phosphohydrolase	C22235[c] + C00001[c] --> C22274[c] + C00009[c]	(pvm:113824154) or (pvm:113825349)	pvm:113824154;pvm:113825349	rn01100	0	1000	0		3.6.1.58	Global and overview maps	N
R00014	pyruvate:thiamin diphosphate acetaldehydetransferase (decarboxylating)	C00022[c] + C00068[c] --> C05125[c] + C00011[c]			rn00010	0	1000	0		1.2.4.1;2.2.1.6;4.1.1.1	Carbohydrate metabolism	N
R00658	2-phospho-D-glycerate hydro-lyase (phosphoenolpyruvate-forming)	C00631[c] <=> C00074[c] + C00001[c]			rn00010	-1000	1000	0		4.2.1.11	Carbohydrate metabolism	Y
R01061	D-glyceraldehyde-3-phosphate:NAD+ oxidoreductase (phosphorylating)	C00118[c] + C00009[c] + C00003[c] <=> C00236[c] + C00004[c] + C00080[c]			rn00010	-1000	1000	0		1.2.1.12; 1.2.1.59	Carbohydrate metabolism	Y
R01196	pyruvate:ferredoxin 2-oxidoreductase (CoA-acetylating)	2 C00138[c] + C00024[c] + C00011[c] + 2 C00080[c] <=> 2 C00139[c] + C00022[c] + C00010[c]			rn00010	-1000	1000	0		1.2.7.1;1.2.7.11	Carbohydrate metabolism	Y
R00947	alpha-D-glucose-1-phosphate phosphohydrolase	C00103[c] + C00001[c] --> C00267[c] + C00009[c]			rn00010	0	1000	0		3.1.3.10	Carbohydrate metabolism	N
R00959	alpha-D-Glucose 1-phosphate 1,6-phosphomutase	C00103[c] <=> C00668[c]			rn00010	-1000	1000	0		5.4.2.2;5.4.2.5	Carbohydrate metabolism	Y
R01058	D-glyceraldehyde 3-phosphate:NADP+ oxidoreductase	C00118[c] + C00006[c] + C00001[c] --> C00197[c] + C00005[c] + C00080[c]			rn00010	0	1000	0		1.2.1.9;1.2.1.90	Carbohydrate metabolism	N
R01600	ATP:beta-D-glucose 6-phosphotransferase	C00002[c] + C00221[c] --> C00008[c] + C01172[c]			rn00010	0	1000	0		2.7.1.1;2.7.1.2	Carbohydrate metabolism	N
R02187	Polyphosphate:D-glucose 6-phosphotransferase	C00404[c] + C00221[c] --> C00404[c] + C01172[c]			rn00010	0	1000	0		2.7.1.63	Carbohydrate metabolism	N
R02189	Polyphosphate:D-glucose 6-phosphotransferase	C00404[c] + C00267[c] --> C00404[c] + C00668[c]			rn00010	0	1000	0		2.7.1.63	Carbohydrate metabolism	N
R07159	D-glyceraldehyde-3-phosphate:ferredoxin oxidoreductase	C00118[c] + C00001[c] + 2 C00139[c] --> C00197[c] + 2 C00080[c] + 2 C00138[c]			rn00010	0	1000	0		1.2.7.6	Carbohydrate metabolism	N
R09085	ADP:D-glucose 6-phosphotransferase	C00267[c] + C00008[c] --> C00668[c] + C00020[c]			rn00010	0	1000	0		2.7.1.147	Carbohydrate metabolism	N
R09086	ADP:D-glucose 6-phosphotransferase	C00221[c] + C00008[c] <=> C01172[c] + C00020[c]			rn00010	-1000	1000	0		2.7.1.147	Carbohydrate metabolism	Y
R10860	D-glyceraldehyde-3-phosphate:NAD+ oxidoreductase	C00118[c] + C00003[c] + C00001[c] --> C00197[c] + C00004[c] + C00080[c]			rn00010	0	1000	0		1.2.1.90	Carbohydrate metabolism	N
R01082	(S)-malate hydro-lyase (fumarate-forming)	C00149[c] <=> C00122[c] + C00001[c]			rn00020	-1000	1000	0		4.2.1.2	Carbohydrate metabolism	Y
R00342	(S)-malate:NAD+ oxidoreductase	C00149[c] + C00003[c] <=> C00036[c] + C00004[c] + C00080[c]			rn00020	-1000	1000	0		1.1.1.37; 1.1.1.299	Carbohydrate metabolism	Y
R02164	succinate:quinone oxidoreductase	C15602[c] + C00042[c] <=> C15603[c] + C00122[c]			rn00020	-1000	1000	0		1.3.5.1;1.3.5.4	Carbohydrate metabolism	Y
R00361	(S)-malate:quinone oxidoreductase	C00149[c] + C15602[c] --> C00036[c] + C15603[c]			rn00020	0	1000	0		1.1.5.4	Carbohydrate metabolism	N
R00351	acetyl-CoA:oxaloacetate C-acetyltransferase (thioester-hydrolysing)	C00158[c] + C00010[c] <=> C00024[c] + C00001[c] + C00036[c]			rn00020	-1000	1000	0		2.3.3.1;2.3.3.3;2.3.3.16	Carbohydrate metabolism	Y
R01056	D-ribose-5-phosphate aldose-ketose-isomerase	C00117[c] <=> C00199[c]			rn00030	-1000	1000	0		5.3.1.6	Carbohydrate metabolism	Y
R01737	ATP:D-Gluconate 6-phosphotransferase	C00002[c] + C00257[c] --> C00008[c] + C00345[c]			rn00030	0	1000	0		2.7.1.12	Carbohydrate metabolism	N
R01528	6-phospho-D-gluconate:NADP+ 2-oxidoreductase (decarboxylating)	C00345[c] + C00006[c] --> C00199[c] + C00011[c] + C00005[c] + C00080[c]			rn00030	0	1000	0		1.1.1.44; 1.1.1.351	Carbohydrate metabolism	N
R10221	6-phospho-D-gluconate:NAD+ 2-oxidoreductase (decarboxylating)	C00345[c] + C00003[c] --> C00199[c] + C00011[c] + C00004[c] + C00080[c]			rn00030	0	1000	0		1.1.1.343;1.1.1.351	Carbohydrate metabolism	N
R01432	D-xylose aldose-ketose-isomerase	C00181[c] <=> C00310[c]			rn00040	-1000	1000	0		5.3.1.5	Carbohydrate metabolism	Y
R02640	L-Gulonate:NAD+ 3-oxidoreductase	C00800[c] + C00003[c] <=> C00618[c] + C00004[c] + C00080[c]			rn00040	-1000	1000	0		1.1.1.45	Carbohydrate metabolism	Y
R01905	3-Dehydro-L-gulonate carboxy-lyase	C00618[c] <=> C00312[c] + C00011[c]			rn00040	-1000	1000	0		4.1.1.34	Carbohydrate metabolism	Y
R01526	ATP:D-ribulose 5-phosphotransferase	C00002[c] + C00309[c] <=> C00008[c] + C00199[c]			rn00040	-1000	1000	0		2.7.1.16; 2.7.1.47	Carbohydrate metabolism	Y
[truncated: 795 more rows]

## Sheet: Metabolite List
Abbreviation	Description	Charged formula	Compartment
[truncated: 2,184 more rows]
